# Supplementary material
Source: publisher figshare collection journal article supplement (https://gsajournals.figshare.com/articles/dataset/_/11292143)

**Figure S1. Increased oxidative-stress resistance upon *AKT1* or *KEAP1* knockdown (related to Figure 1)**

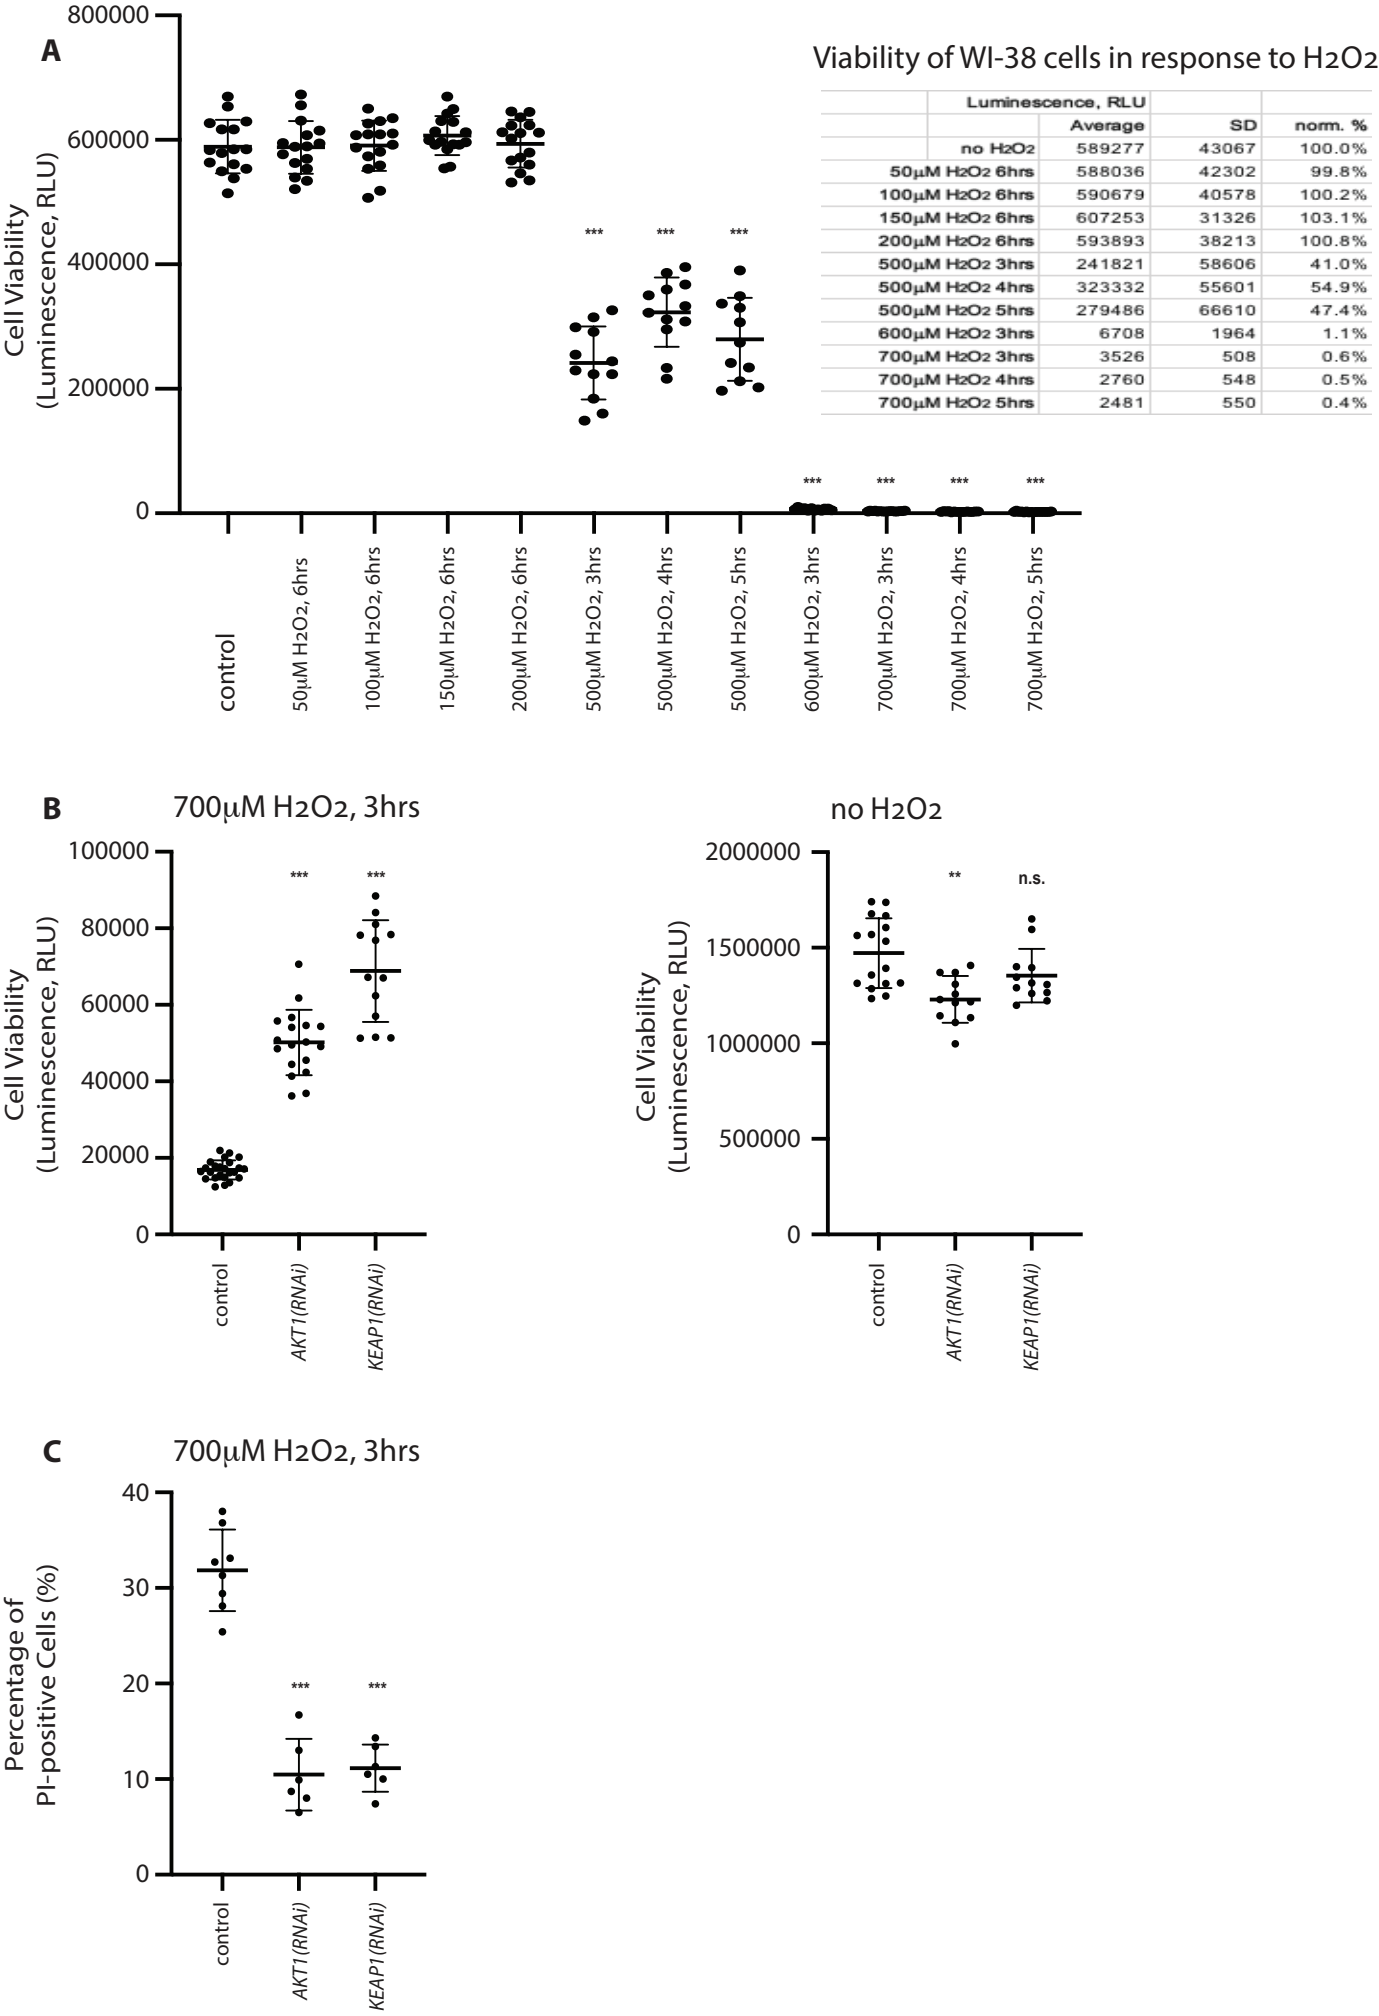

**Figure S2. Z-prime scores across the screen (related to Figure 1)**

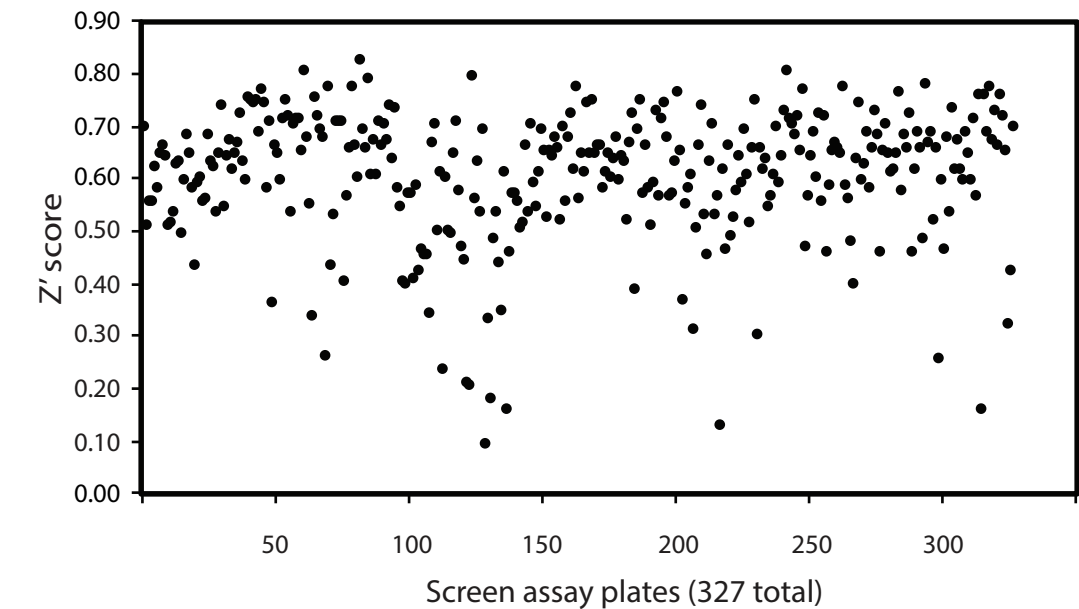

**Figure S3. ROS-scavenging capacity of certain small molecules in the absence of cells (related to Figure 1)**

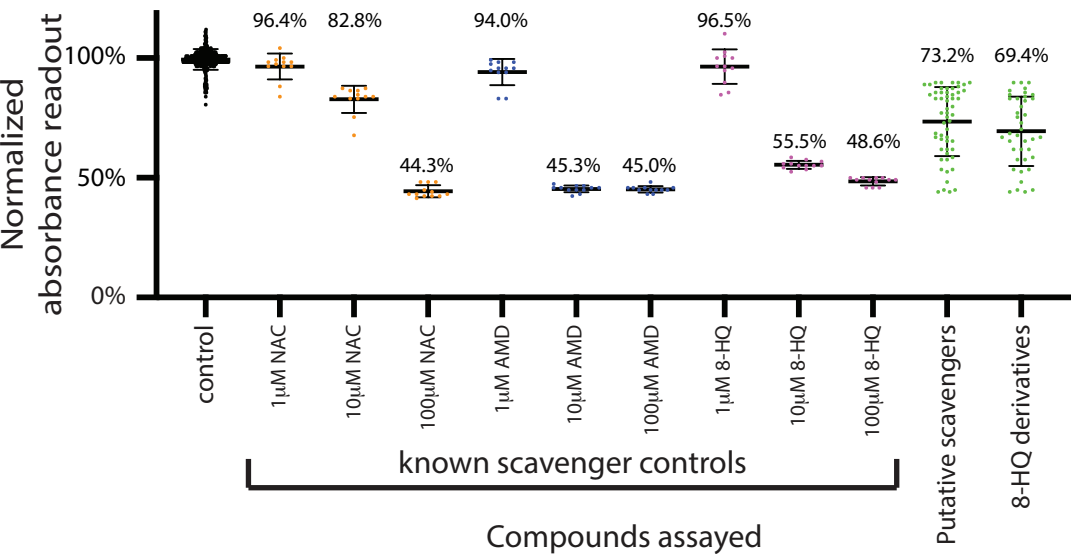

**Figure S4. No H<sub>2</sub>O<sub>2</sub>-quenching effects by small molecules in the absence of cells (related to Figure 2)**

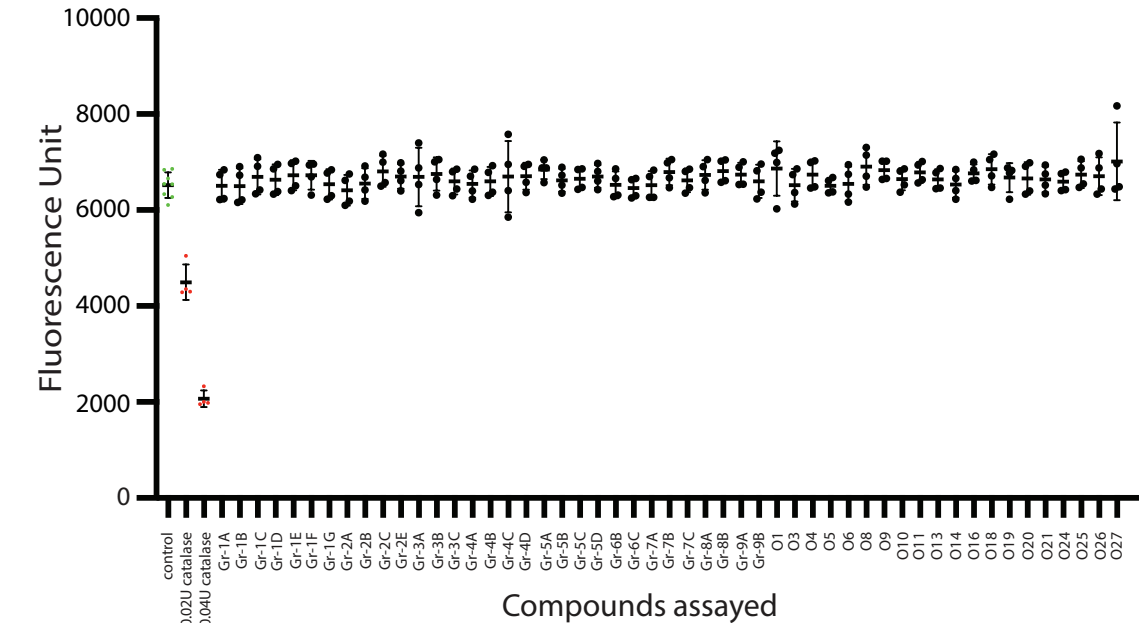

**Figure S5-1. Long-term effects of small molecules on ATP levels (related to Figure 3)**

**A**

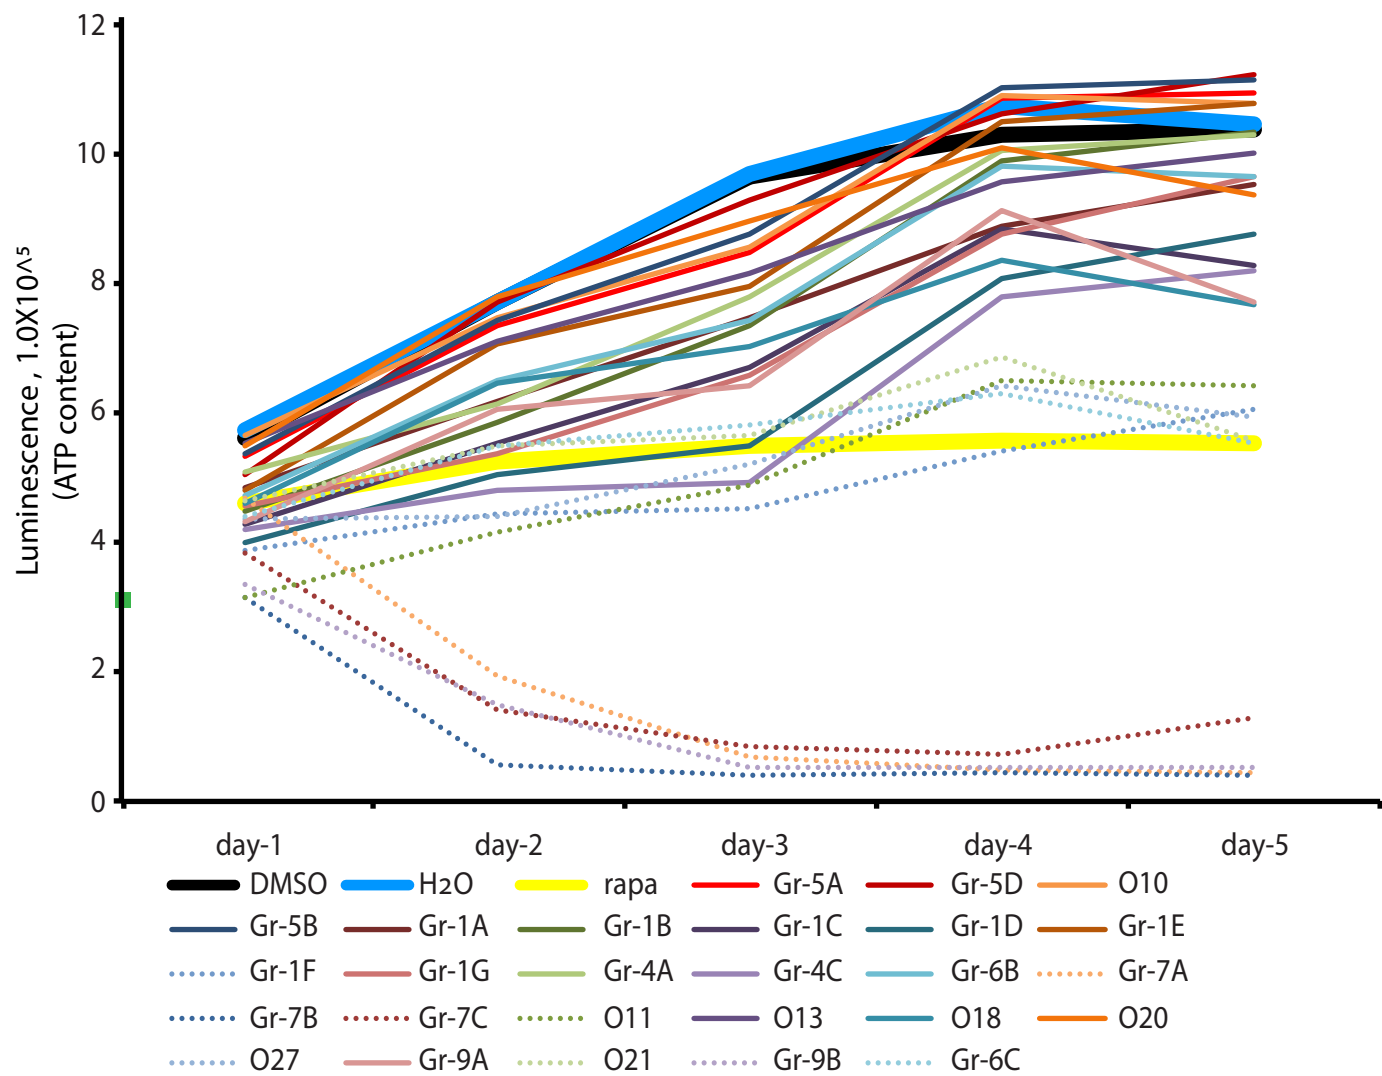

**B**

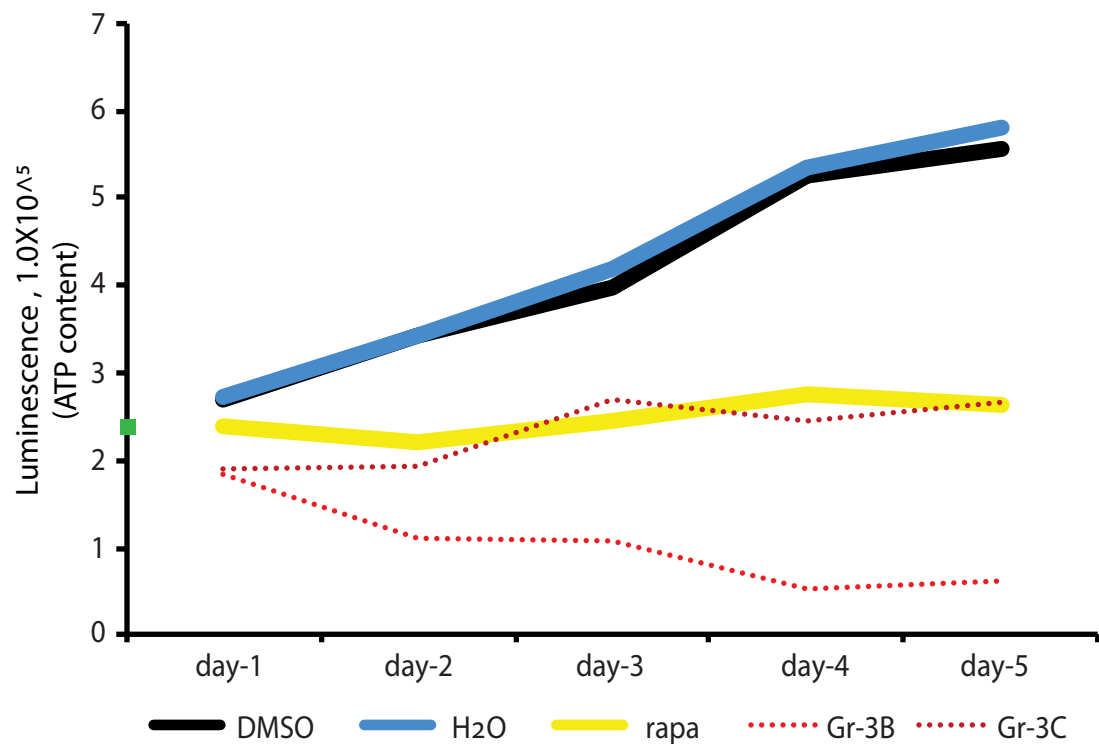

**Figure S5-2. Effects of prolonged small-molecule incubation on WI-38 cell confluency (related to Figure 3)**

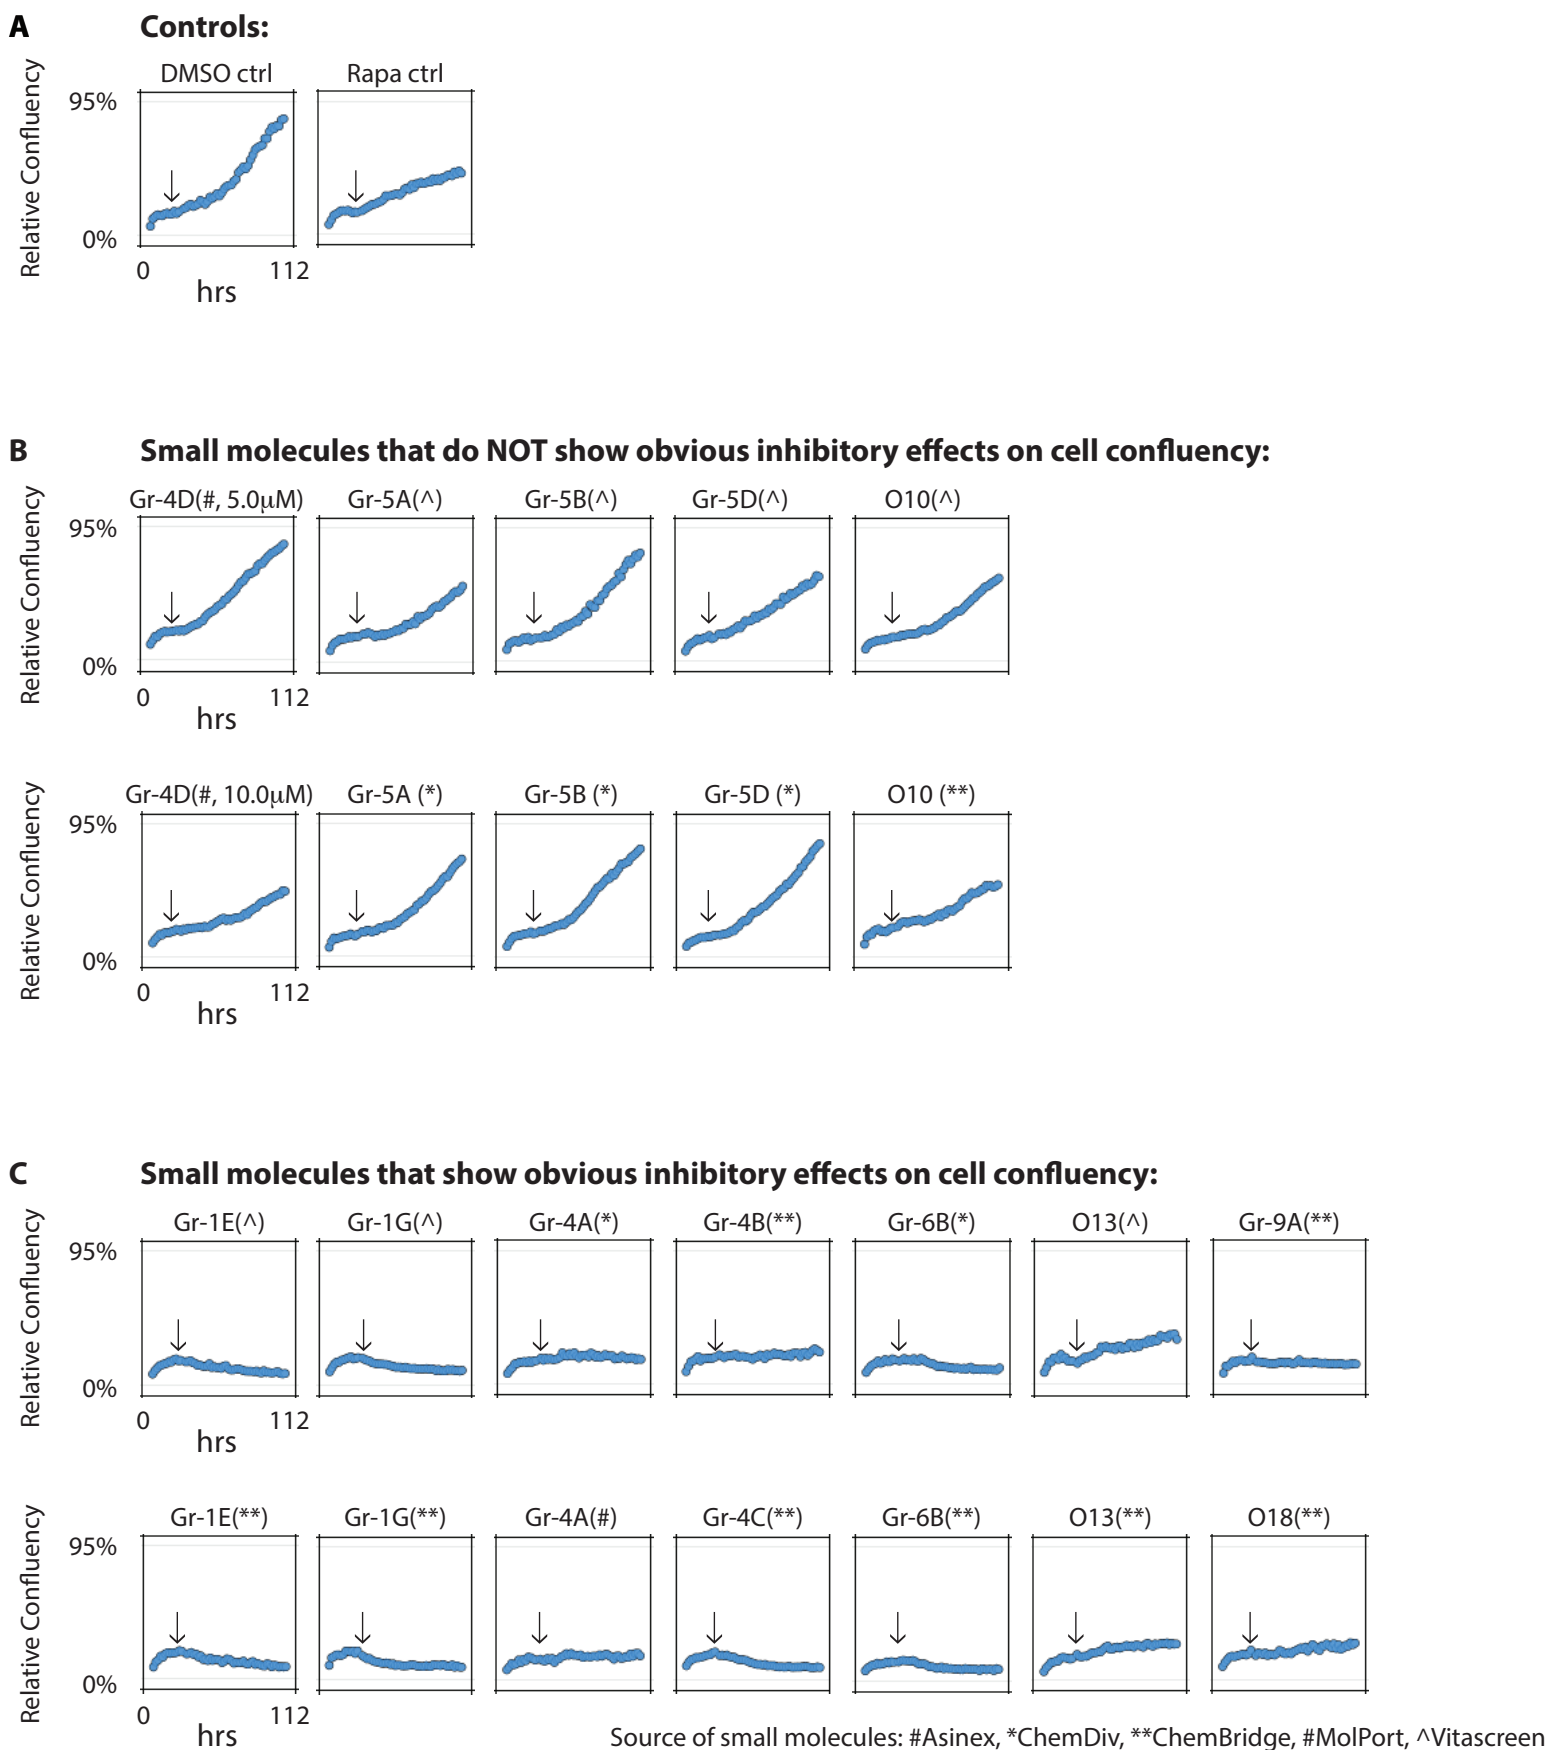



**Figure S6. Increased cells viability upon H<sub>2</sub>O<sub>2</sub> by small molecules (related to Figure 3)**

**A**

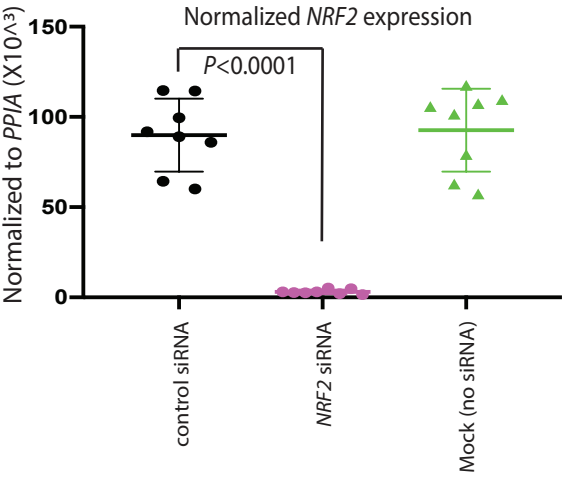

**B**

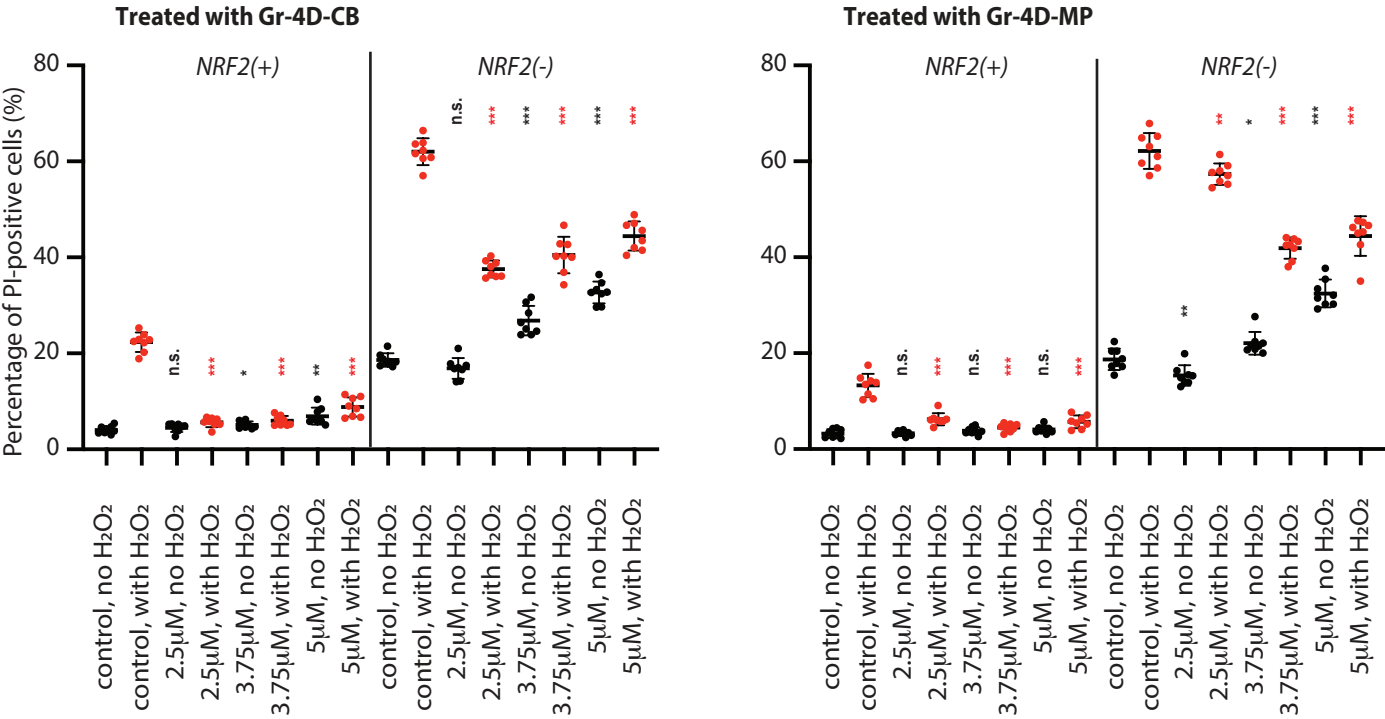

**C**

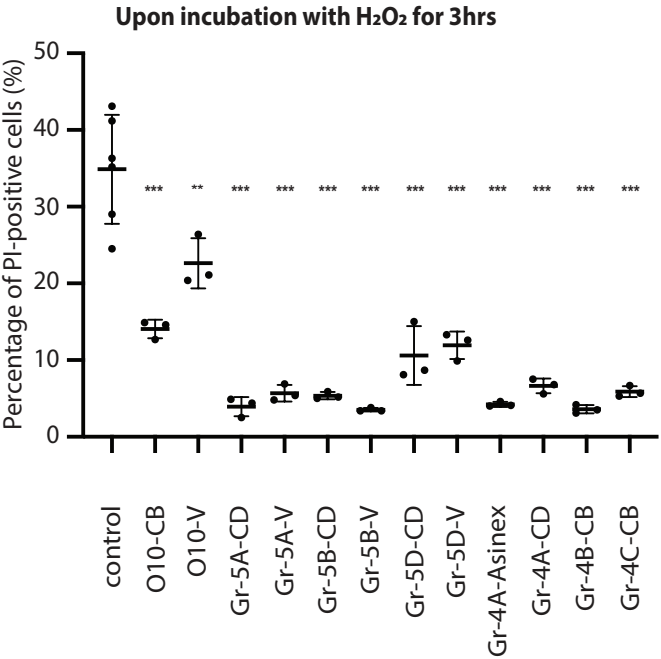

Figure S7. Effects of small molecules on gene expression of WI-38 cells (related to Figure 3)

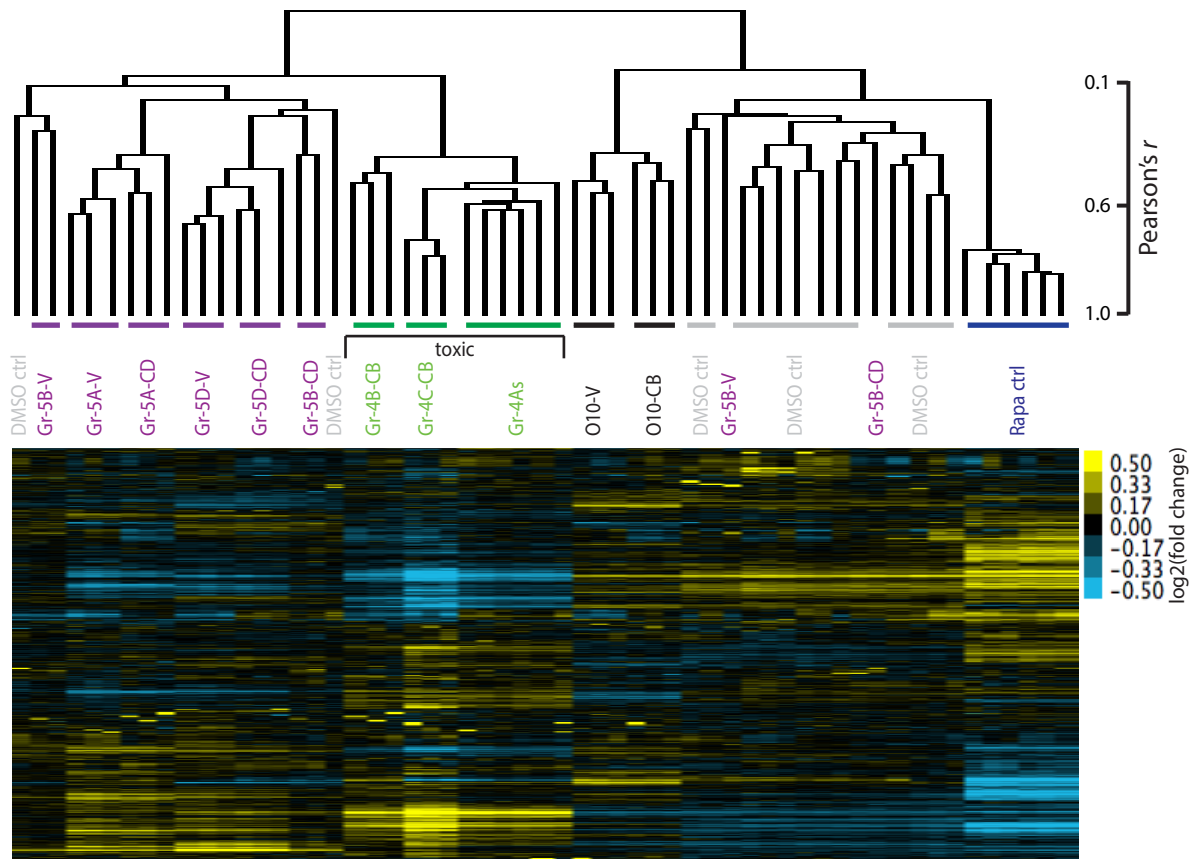

Figure S8. Inhibitory effects of certain small molecules on PARP (related to Figure 2)

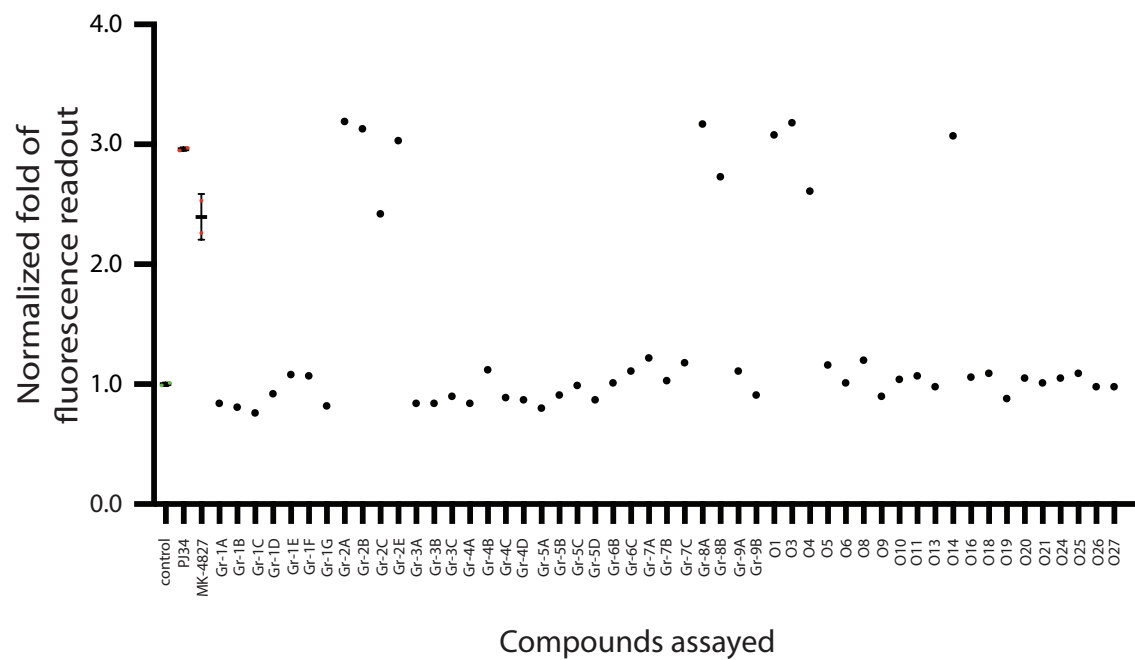

**Figure S9. Protective effects of certain small molecules against poly-Q toxicity (related to Table 1)**

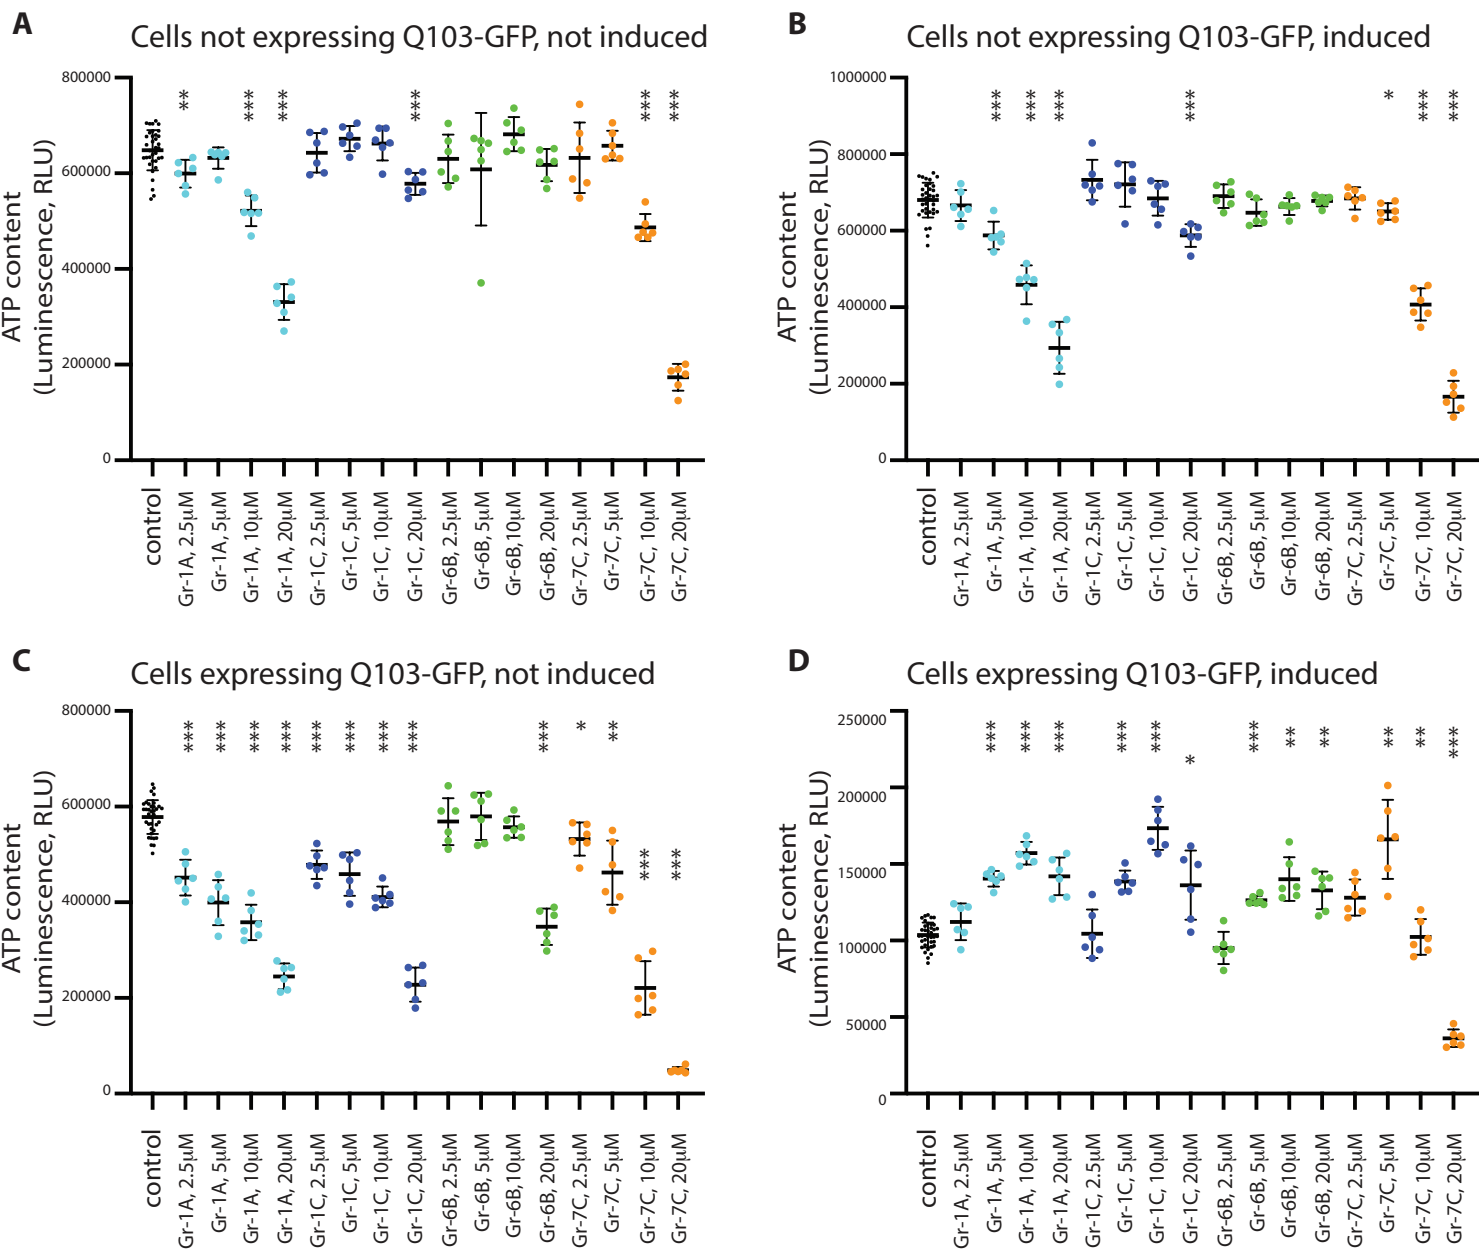

**Figure S10. Effects of Gr-4D on *C. elegans* expressing several pathway reporters & on lifespan of worms treated with *sesn-1(RNAi)* (related to Figure 4)**

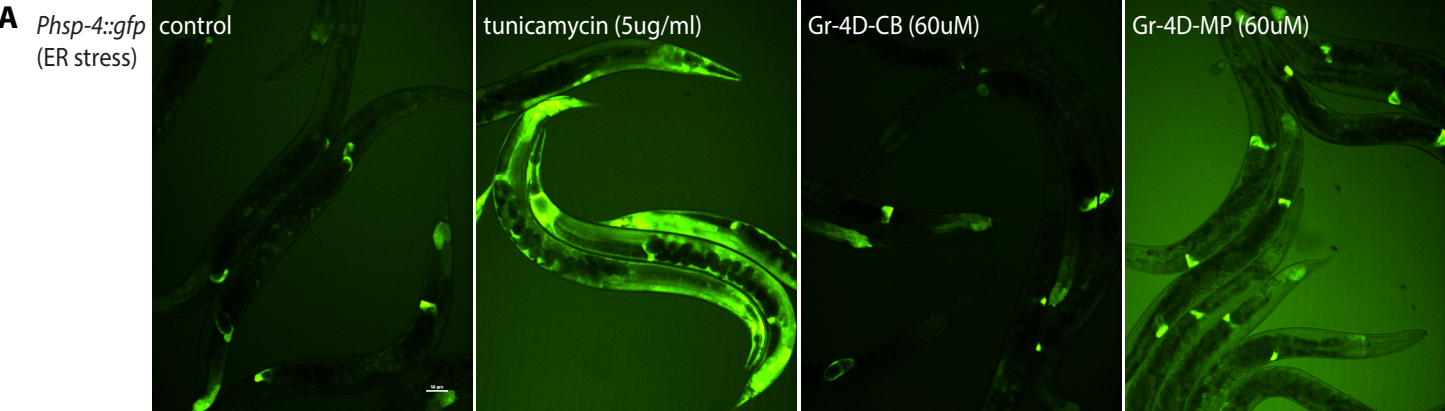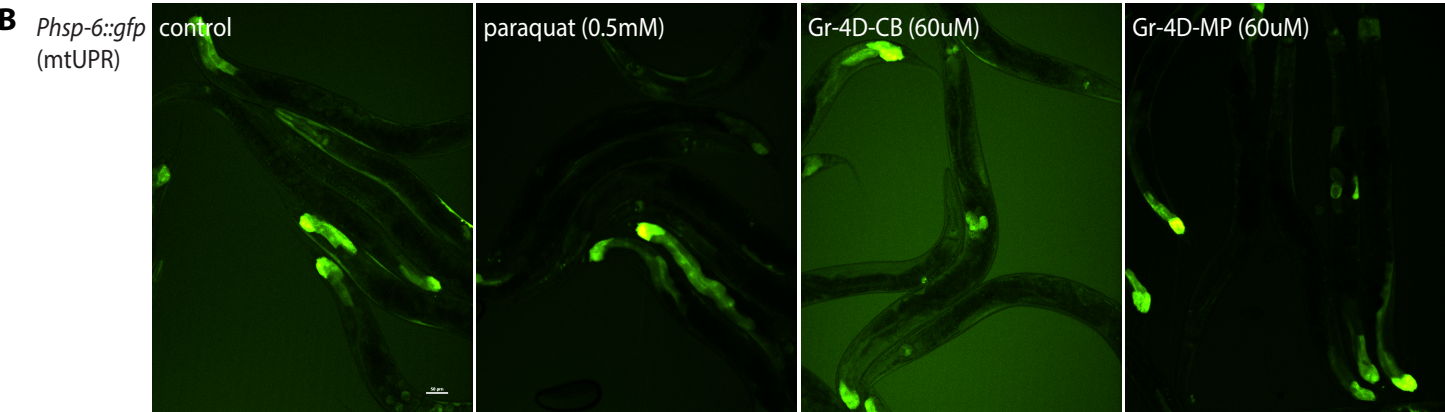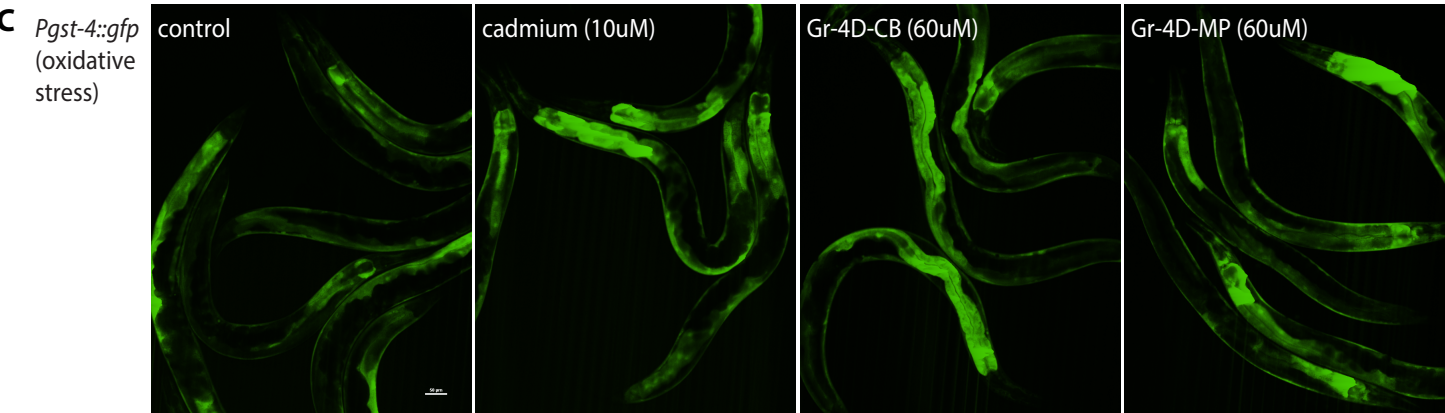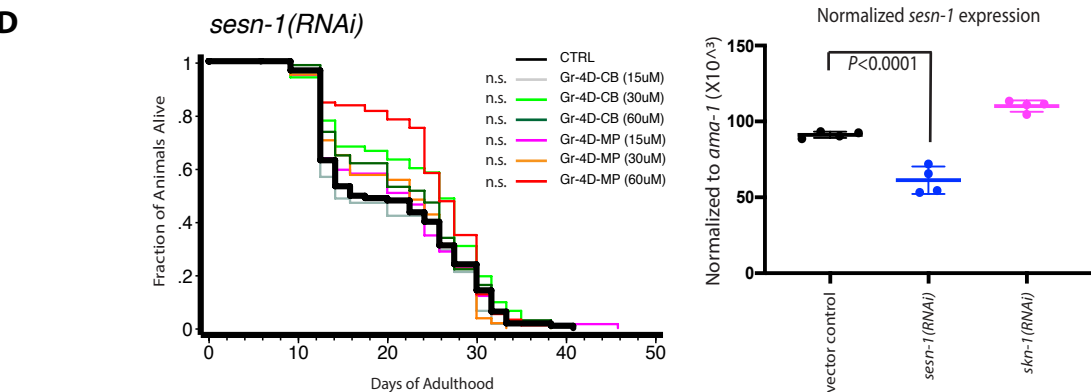

Supplement: Supplementary file 3 [file 2]
