# Supplementary material
Source: publisher figshare collection journal article supplement (https://gsajournals.figshare.com/articles/dataset/_/11292143)
Supplement: Supplementary file 1 [file 2]

## Sheet: Table S5B, Gr-5A-V, non-toxic
Table S5B. List of significant genes identified by microarray for cells treated with others
NCBI RefSeq	Gene Symbol	NBCI RefSeq || Gene Symbol || Gene Description (total # of significant genes: 440; 212 up, 228 down)	Normalized Fold (Unlogged)	q-value (%)
NM_014398	LAMP3	NM_014398 || LAMP3 || Homo sapiens lysosomal-associated membrane protein 3 (LAMP3), mRNA [NM_014398]	5.53451	0
NM_032413	C15orf48	NM_032413 || C15orf48 || Homo sapiens chromosome 15 open reading frame 48 (C15orf48), transcript variant 2, mRNA [NM_032413]	4.83115	5.62662
NM_024875	SYNPO2L	NM_024875 || SYNPO2L || Homo sapiens synaptopodin 2-like (SYNPO2L), transcript variant 2, mRNA [NM_024875]	4.32898	5.70278
NM_001165252	KRTAP2-3	NM_001165252 || KRTAP2-3 || Homo sapiens keratin associated protein 2-3 (KRTAP2-3), mRNA [NM_001165252]	3.92893	5.28675
lnc-HK2-1:1	lnc-HK2-1	lnc-HK2-1:1 || lnc-HK2-1 || LNCipedia lincRNA (lnc-HK2-1), lincRNA [lnc-HK2-1:1]	3.59301	4.75367
ENST00000453951	LINC01293	ENST00000453951 || LINC01293 || long intergenic non-protein coding RNA 1293 [Source:HGNC Symbol;Acc:HGNC:50362] [ENST00000453951]	3.27873	6.5831
NM_004911	PDIA4	NM_004911 || PDIA4 || Homo sapiens protein disulfide isomerase family A, member 4 (PDIA4), mRNA [NM_004911]	2.92819	2.30193
NM_001205288	LIMS3L	NM_001205288 || LIMS3L || Homo sapiens LIM and senescent cell antigen-like domains 3-like (LIMS3L), transcript variant 1, mRNA [NM_001205288]	2.89875	2.7952
ENST00000539116		ENST00000539116 || || Unknown	2.79499	8.70384
NM_003299	HSP90B1	NM_003299 || HSP90B1 || Homo sapiens heat shock protein 90kDa beta (Grp94), member 1 (HSP90B1), mRNA [NM_003299]	2.77699	2.30193
NM_018423	STYK1	NM_018423 || STYK1 || Homo sapiens serine/threonine/tyrosine kinase 1 (STYK1), mRNA [NM_018423]	2.68671	8.02947
NM_000804	FOLR3	NM_000804 || FOLR3 || Homo sapiens folate receptor 3 (gamma) (FOLR3), mRNA [NM_000804]	2.64619	9.80229
NM_021827	CCDC81	NM_021827 || CCDC81 || Homo sapiens coiled-coil domain containing 81 (CCDC81), transcript variant 2, mRNA [NM_021827]	2.60375	9.41364
NM_000916	OXTR	NM_000916 || OXTR || Homo sapiens oxytocin receptor (OXTR), mRNA [NM_000916]	2.59459	4.78873
NM_021013	KRT34	NM_021013 || KRT34 || Homo sapiens keratin 34, type I (KRT34), mRNA [NM_021013]	2.56115	9.03798
NM_001159	AOX1	NM_001159 || AOX1 || Homo sapiens aldehyde oxidase 1 (AOX1), mRNA [NM_001159]	2.5514	6.87155
NR_120367	LINC01583	NR_120367 || LINC01583 || Homo sapiens long intergenic non-protein coding RNA 1583 (LINC01583), long non-coding RNA [NR_120367]	2.47625	8.32941
NR_033752	LOC344887	NR_033752 || LOC344887 || Homo sapiens NmrA-like family domain containing 1 pseudogene (LOC344887), non-coding RNA [NR_033752]	2.46154	8.32941
ENST00000415545		ENST00000415545 || || heat shock protein 90kDa beta (Grp94), member 3, pseudogene [Source:HGNC Symbol;Acc:HGNC:12100] [ENST00000415545]	2.4512	2.17405
NR_125792	LINC01291	NR_125792 || LINC01291 || Homo sapiens long intergenic non-protein coding RNA 1291 (LINC01291), long non-coding RNA [NR_125792]	2.40945	6.12828
NM_019055	ROBO4	NM_019055 || ROBO4 || Homo sapiens roundabout, axon guidance receptor, homolog 4 (Drosophila) (ROBO4), transcript variant 1, mRNA [NM_019055]	2.3895	8.29805
NM_001794	CDH4	NM_001794 || CDH4 || Homo sapiens cadherin 4, type 1, R-cadherin (retinal) (CDH4), transcript variant 1, mRNA [NM_001794]	2.36311	8.92023
NM_024324	CRELD2	NM_024324 || CRELD2 || Homo sapiens cysteine-rich with EGF-like domains 2 (CRELD2), transcript variant 2, mRNA [NM_024324]	2.36046	2.82402
NM_001168399	BEX2	NM_001168399 || BEX2 || Homo sapiens brain expressed X-linked 2 (BEX2), transcript variant 1, mRNA [NM_001168399]	2.35292	2.7952
NM_000379	XDH	NM_000379 || XDH || Homo sapiens xanthine dehydrogenase (XDH), mRNA [NM_000379]	2.34327	6.44003
NR_110429	LINC01540	NR_110429 || LINC01540 || Homo sapiens long intergenic non-protein coding RNA 1540 (LINC01540), transcript variant 1, long non-coding RNA [NR_110429]	2.34007	6.12828
NM_001103161	SH2D5	NM_001103161 || SH2D5 || Homo sapiens SH2 domain containing 5 (SH2D5), transcript variant 1, mRNA [NM_001103161]	2.31774	6.78656
NM_018712	ELMOD1	NM_018712 || ELMOD1 || Homo sapiens ELMO/CED-12 domain containing 1 (ELMOD1), transcript variant 1, mRNA [NM_018712]	2.29807	4.75367
NR_110428	LINC01540	NR_110428 || LINC01540 || Homo sapiens long intergenic non-protein coding RNA 1540 (LINC01540), transcript variant 2, long non-coding RNA [NR_110428]	2.26821	6.27153
ENST00000451149		ENST00000451149 || || Unknown	2.25613	5.00195
lnc-SHPRH-2:8	lnc-SHPRH-2	lnc-SHPRH-2:8 || lnc-SHPRH-2 || LNCipedia lincRNA (lnc-SHPRH-2), lincRNA [lnc-SHPRH-2:8]	2.23027	5.44687
NM_182527	CABP7	NM_182527 || CABP7 || Homo sapiens calcium binding protein 7 (CABP7), mRNA [NM_182527]	2.22073	6.20306
NM_203394	E2F7	NM_203394 || E2F7 || Homo sapiens E2F transcription factor 7 (E2F7), mRNA [NM_203394]	2.21002	2.82888
NM_001423	EMP1	NM_001423 || EMP1 || Homo sapiens epithelial membrane protein 1 (EMP1), mRNA [NM_001423]	2.19115	4.77458
NM_001164460	STEAP1B	NM_001164460 || STEAP1B || Homo sapiens STEAP family member 1B (STEAP1B), transcript variant 1, mRNA [NM_001164460]	2.16197	6.38036
NM_014903	NAV3	NM_014903 || NAV3 || Homo sapiens neuron navigator 3 (NAV3), transcript variant 2, mRNA [NM_014903]	2.15777	5.99551
NM_005314	GRPR	NM_005314 || GRPR || Homo sapiens gastrin-releasing peptide receptor (GRPR), mRNA [NM_005314]	2.15009	7.69337
NM_021226	ARHGAP22	NM_021226 || ARHGAP22 || Homo sapiens Rho GTPase activating protein 22 (ARHGAP22), transcript variant 3, mRNA [NM_021226]	2.14099	4.78873
NM_021724	NR1D1	NM_021724 || NR1D1 || Homo sapiens nuclear receptor subfamily 1, group D, member 1 (NR1D1), mRNA [NM_021724]	2.13919	3.15588
NM_016270	KLF2	NM_016270 || KLF2 || Homo sapiens Kruppel-like factor 2 (KLF2), mRNA [NM_016270]	2.09936	5.70479
NM_001040058	SPP1	NM_001040058 || SPP1 || Homo sapiens secreted phosphoprotein 1 (SPP1), transcript variant 1, mRNA [NM_001040058]	2.079	7.72687
NM_001282431	ARL4C	NM_001282431 || ARL4C || Homo sapiens ADP-ribosylation factor-like 4C (ARL4C), transcript variant 1, mRNA [NM_001282431]	2.04888	2.30193
lnc-CTD-3080F16.3.1-1:1	lnc-CTD-3080F16.3.1-1	lnc-CTD-3080F16.3.1-1:1 || lnc-CTD-3080F16.3.1-1 || LNCipedia lincRNA (lnc-CTD-3080F16.3.1-1), lincRNA [lnc-CTD-3080F16.3.1-1:1]	2.04812	7.48309
lnc-RP11-17M16.1.1-1:1	lnc-RP11-17M16.1.1-1	lnc-RP11-17M16.1.1-1:1 || lnc-RP11-17M16.1.1-1 || PREDICTED: Homo sapiens uncharacterized LOC101927989 (LOC101927989), mRNA [XM_006722594]	2.04446	9.15556
NM_080927	DCBLD2	NM_080927 || DCBLD2 || Homo sapiens discoidin, CUB and LCCL domain containing 2 (DCBLD2), mRNA [NM_080927]	2.04439	5.48592
NM_000758	CSF2	NM_000758 || CSF2 || Homo sapiens colony stimulating factor 2 (granulocyte-macrophage) (CSF2), mRNA [NM_000758]	2.02539	9.33288
NM_033280	SEC11C	NM_033280 || SEC11C || Homo sapiens SEC11 homolog C (S. cerevisiae) (SEC11C), mRNA [NM_033280]	2.01299	3.2164
NM_001003927	EVI2A	NM_001003927 || EVI2A || Homo sapiens ecotropic viral integration site 2A (EVI2A), transcript variant 1, mRNA [NM_001003927]	2.00475	6.66617
A_33_P3317460		A_33_P3317460 || unmapped	2.00309	8.80957
NM_001012761	RGMB	NM_001012761 || RGMB || Homo sapiens repulsive guidance molecule family member b (RGMB), mRNA [NM_001012761]	2.00037	8.15095
NM_004811	LPXN	NM_004811 || LPXN || Homo sapiens leupaxin (LPXN), transcript variant 2, mRNA [NM_004811]	1.99903	5.28675
NM_005613	RGS4	NM_005613 || RGS4 || Homo sapiens regulator of G-protein signaling 4 (RGS4), transcript variant 2, mRNA [NM_005613]	1.98812	8.52918
NM_001277313	FMN1	NM_001277313 || FMN1 || Homo sapiens formin 1 (FMN1), transcript variant 1, mRNA [NM_001277313]	1.98608	7.74997
NM_001287426	UPP1	NM_001287426 || UPP1 || Homo sapiens uridine phosphorylase 1 (UPP1), transcript variant 3, mRNA [NM_001287426]	1.98347	3.4529
lnc-RAB30-1:1	lnc-RAB30-1	lnc-RAB30-1:1 || lnc-RAB30-1 || LNCipedia lincRNA (lnc-RAB30-1), lincRNA [lnc-RAB30-1:1]	1.98335	9.41364
NM_005415	SLC20A1	NM_005415 || SLC20A1 || Homo sapiens solute carrier family 20 (phosphate transporter), member 1 (SLC20A1), mRNA [NM_005415]	1.97944	1.82013
NM_002317	LOX	NM_002317 || LOX || Homo sapiens lysyl oxidase (LOX), transcript variant 1, mRNA [NM_002317]	1.97916	5.3363
ENST00000586949	LOC100130938	ENST00000586949 || LOC100130938 || PREDICTED: Homo sapiens uncharacterized LOC100130938 (LOC100130938), transcript variant X1, ncRNA [XR_110148]	1.97386	5.35914
NM_000960	PTGIR	NM_000960 || PTGIR || Homo sapiens prostaglandin I2 (prostacyclin) receptor (IP) (PTGIR), mRNA [NM_000960]	1.94604	6.5831
lnc-GDF5-1:2	lnc-GDF5-1	lnc-GDF5-1:2 || lnc-GDF5-1 || LNCipedia lincRNA (lnc-GDF5-1), lincRNA [lnc-GDF5-1:2]	1.94511	7.60269
TCONS_l2_00027783	XLOC_l2_014217	TCONS_l2_00027783 || XLOC_l2_014217 || BROAD Institute lincRNA (XLOC_l2_014217), lincRNA [TCONS_l2_00027783]	1.93948	5.31434
NR_034147	APCDD1L-AS1	NR_034147 || APCDD1L-AS1 || Homo sapiens APCDD1L antisense RNA 1 (head to head) (APCDD1L-AS1), long non-coding RNA [NR_034147]	1.93354	8.32941
NM_032181	EVA1A	NM_032181 || EVA1A || Homo sapiens eva-1 homolog A (C. elegans) (EVA1A), transcript variant 2, mRNA [NM_032181]	1.92316	2.30193
NM_002185	IL7R	NM_002185 || IL7R || Homo sapiens interleukin 7 receptor (IL7R), transcript variant 1, mRNA [NM_002185]	1.92239	4.49066
NM_000602	SERPINE1	NM_000602 || SERPINE1 || Homo sapiens serpin peptidase inhibitor, clade E (nexin, plasminogen activator inhibitor type 1), member 1 (SERPINE1), mRNA [NM_000602]	1.92009	4.7656
NM_001291317	MILR1	NM_001291317 || MILR1 || Homo sapiens mast cell immunoglobulin-like receptor 1 (MILR1), transcript variant S2, mRNA [NM_001291317]	1.91283	8.32941
NM_001135032	EVA1A	NM_001135032 || EVA1A || Homo sapiens eva-1 homolog A (C. elegans) (EVA1A), transcript variant 1, mRNA [NM_001135032]	1.90837	5.04475
NM_198465	NRK	NM_198465 || NRK || Homo sapiens Nik related kinase (NRK), mRNA [NM_198465]	1.90324	6.5616
ENST00000554254		ENST00000554254 || || HIF1A antisense RNA 2 [Source:HGNC Symbol;Acc:HGNC:43015] [ENST00000554254]	1.8897	6.87155
NM_003483	HMGA2	NM_003483 || HMGA2 || Homo sapiens high mobility group AT-hook 2 (HMGA2), transcript variant 1, mRNA [NM_003483]	1.86304	8.29805
NM_012242	DKK1	NM_012242 || DKK1 || Homo sapiens dickkopf WNT signaling pathway inhibitor 1 (DKK1), mRNA [NM_012242]	1.85568	7.16556
NM_000700	ANXA1	NM_000700 || ANXA1 || Homo sapiens annexin A1 (ANXA1), mRNA [NM_000700]	1.85461	6.85124
NR_121621	LOC100507420	NR_121621 || LOC100507420 || Homo sapiens uncharacterized LOC100507420 (LOC100507420), transcript variant 2, long non-coding RNA [NR_121621]	1.83269	8.80957
NM_138420	AHNAK2	NM_138420 || AHNAK2 || Homo sapiens AHNAK nucleoprotein 2 (AHNAK2), mRNA [NM_138420]	1.83019	9.7153
ENST00000550766	CRADD	ENST00000550766 || CRADD || CASP2 and RIPK1 domain containing adaptor with death domain [Source:HGNC Symbol;Acc:HGNC:2340] [ENST00000550766]	1.82632	8.22069
NM_181847	AMIGO2	NM_181847 || AMIGO2 || Homo sapiens adhesion molecule with Ig-like domain 2 (AMIGO2), transcript variant 2, mRNA [NM_181847]	1.82449	2.30193
NM_198277	SLC37A2	NM_198277 || SLC37A2 || Homo sapiens solute carrier family 37 (glucose-6-phosphate transporter), member 2 (SLC37A2), transcript variant 1, mRNA [NM_198277]	1.81345	4.75367
A_33_P3277228		A_33_P3277228 || unmapped	1.81247	9.2321
NM_001206673	ABHD12B	NM_001206673 || ABHD12B || Homo sapiens abhydrolase domain containing 12B (ABHD12B), transcript variant 1, mRNA [NM_001206673]	1.81204	6.20445
NM_001885	CRYAB	NM_001885 || CRYAB || Homo sapiens crystallin, alpha B (CRYAB), transcript variant 1, mRNA [NM_001885]	1.80875	9.80229
ENST00000555069	ERO1L	ENST00000555069 || ERO1L || ERO1-like (S. cerevisiae) [Source:HGNC Symbol;Acc:HGNC:13280] [ENST00000555069]	1.80556	6.23857
ENST00000601437		ENST00000601437 || || KIAA1328 [Source:HGNC Symbol;Acc:HGNC:29248] [ENST00000601437]	1.79878	7.16556
lnc-NAP1L3-1:1	lnc-NAP1L3-1	lnc-NAP1L3-1:1 || lnc-NAP1L3-1 || Homo sapiens cDNA FLJ43298 fis, clone NCRRP1000129. [AK125288]	1.7928	7.13727
NM_005450	NOG	NM_005450 || NOG || Homo sapiens noggin (NOG), mRNA [NM_005450]	1.78456	2.69882
NM_033515	ARHGAP18	NM_033515 || ARHGAP18 || Homo sapiens Rho GTPase activating protein 18 (ARHGAP18), mRNA [NM_033515]	1.76937	3.19452
NR_110274	ATP6V1B1-AS1	NR_110274 || ATP6V1B1-AS1 || Homo sapiens ATP6V1B1 antisense RNA 1 (ATP6V1B1-AS1), transcript variant 2, long non-coding RNA [NR_110274]	1.76484	7.60269
NM_016306	DNAJB11	NM_016306 || DNAJB11 || Homo sapiens DnaJ (Hsp40) homolog, subfamily B, member 11 (DNAJB11), mRNA [NM_016306]	1.75869	2.60886
NM_174941	CD163L1	NM_174941 || CD163L1 || Homo sapiens CD163 molecule-like 1 (CD163L1), transcript variant 2, mRNA [NM_174941]	1.75816	6.5831
NM_002575	SERPINB2	NM_002575 || SERPINB2 || Homo sapiens serpin peptidase inhibitor, clade B (ovalbumin), member 2 (SERPINB2), transcript variant 2, mRNA [NM_002575]	1.74799	4.78873
NM_001945	HBEGF	NM_001945 || HBEGF || Homo sapiens heparin-binding EGF-like growth factor (HBEGF), mRNA [NM_001945]	1.74588	5.16605
NM_015364	LY96	NM_015364 || LY96 || Homo sapiens lymphocyte antigen 96 (LY96), transcript variant 1, mRNA [NM_015364]	1.74423	4.84832
lnc-MOGAT1-1:2	lnc-MOGAT1-1	lnc-MOGAT1-1:2 || lnc-MOGAT1-1 || LNCipedia lincRNA (lnc-MOGAT1-1), lincRNA [lnc-MOGAT1-1:2]	1.7442	9.1701
NM_015714	G0S2	NM_015714 || G0S2 || Homo sapiens G0/G1 switch 2 (G0S2), mRNA [NM_015714]	1.73608	6.10722
A_33_P3245126		A_33_P3245126 || unmapped	1.73403	9.10717
NM_005429	VEGFC	NM_005429 || VEGFC || Homo sapiens vascular endothelial growth factor C (VEGFC), mRNA [NM_005429]	1.73165	4.79378
XM_006723786	KCNG1	XM_006723786 || KCNG1 || PREDICTED: Homo sapiens potassium voltage-gated channel, subfamily G, member 1 (KCNG1), transcript variant X2, mRNA [XM_006723786]	1.72616	5.04475
NM_001290065	ROBO2	NM_001290065 || ROBO2 || Homo sapiens roundabout, axon guidance receptor, homolog 2 (Drosophila) (ROBO2), transcript variant 5, mRNA [NM_001290065]	1.72615	9.5093
NM_003749	IRS2	NM_003749 || IRS2 || Homo sapiens insulin receptor substrate 2 (IRS2), mRNA [NM_003749]	1.71681	3.10578
NR_102743	NR2F2-AS1	NR_102743 || NR2F2-AS1 || Homo sapiens NR2F2 antisense RNA 1 (NR2F2-AS1), transcript variant 1, long non-coding RNA [NR_102743]	1.71358	6.97162
NM_033143	FGF5	NM_033143 || FGF5 || Homo sapiens fibroblast growth factor 5 (FGF5), transcript variant 2, mRNA [NM_033143]	1.71211	9.80229
ENST00000585503	JRK	ENST00000585503 || JRK || Jrk homolog (mouse) [Source:HGNC Symbol;Acc:HGNC:6199] [ENST00000585503]	1.7044	5.75053
NM_001287428	UPP1	NM_001287428 || UPP1 || Homo sapiens uridine phosphorylase 1 (UPP1), transcript variant 4, mRNA [NM_001287428]	1.69653	4.86172
NM_019050	USP53	NM_019050 || USP53 || Homo sapiens ubiquitin specific peptidase 53 (USP53), mRNA [NM_019050]	1.69579	4.9525
NM_001167915	VEPH1	NM_001167915 || VEPH1 || Homo sapiens ventricular zone expressed PH domain-containing 1 (VEPH1), transcript variant 4, mRNA [NM_001167915]	1.69502	8.02947
NM_052867	NALCN	NM_052867 || NALCN || Homo sapiens sodium leak channel, non selective (NALCN), mRNA [NM_052867]	1.69262	6.4118
NM_012194	KIAA1549L	NM_012194 || KIAA1549L || Homo sapiens KIAA1549-like (KIAA1549L), mRNA [NM_012194]	1.68988	7.48309
NR_026558	AQP7P3	NR_026558 || AQP7P3 || Homo sapiens aquaporin 7 pseudogene 3 (AQP7P3), non-coding RNA [NR_026558]	1.68702	5.80804
BC013592	DDIT4L	BC013592 || DDIT4L || Homo sapiens DNA-damage-inducible transcript 4-like, mRNA (cDNA clone MGC:9960 IMAGE:3877854), complete cds. [BC013592]	1.68558	5.80804
lnc-BBC3-1:1	lnc-BBC3-1	lnc-BBC3-1:1 || lnc-BBC3-1 || LNCipedia lincRNA (lnc-BBC3-1), lincRNA [lnc-BBC3-1:1]	1.68528	8.36883
lnc-PPM1M-2:1	lnc-PPM1M-2	lnc-PPM1M-2:1 || lnc-PPM1M-2 || LNCipedia lincRNA (lnc-PPM1M-2), lincRNA [lnc-PPM1M-2:1]	1.67959	9.5093
ENST00000370458	AFF2	ENST00000370458 || AFF2 || AF4/FMR2 family, member 2 [Source:HGNC Symbol;Acc:HGNC:3776] [ENST00000370458]	1.67932	8.41895
NM_024616	C3orf52	NM_024616 || C3orf52 || Homo sapiens chromosome 3 open reading frame 52 (C3orf52), transcript variant 2, mRNA [NM_024616]	1.67662	8.36062
lnc-MTERFD3-1:1	lnc-MTERFD3-1	lnc-MTERFD3-1:1 || lnc-MTERFD3-1 || Homo sapiens cDNA FLJ31150 fis, clone IMR322001534. [AK055712]	1.67078	9.7153
NM_005842	SPRY2	NM_005842 || SPRY2 || Homo sapiens sprouty homolog 2 (Drosophila) (SPRY2), mRNA [NM_005842]	1.67071	5.2042
NM_001018111	PODXL	NM_001018111 || PODXL || Homo sapiens podocalyxin-like (PODXL), transcript variant 1, mRNA [NM_001018111]	1.66953	6.23857
lnc-TPBG-1:1	lnc-TPBG-1	lnc-TPBG-1:1 || lnc-TPBG-1 || LNCipedia lincRNA (lnc-TPBG-1), lincRNA [lnc-TPBG-1:1]	1.66949	7.16556
NM_024599	RHBDF2	NM_024599 || RHBDF2 || Homo sapiens rhomboid 5 homolog 2 (Drosophila) (RHBDF2), transcript variant 1, mRNA [NM_024599]	1.6685	3.22524
NM_001478	B4GALNT1	NM_001478 || B4GALNT1 || Homo sapiens beta-1,4-N-acetyl-galactosaminyl transferase 1 (B4GALNT1), transcript variant 1, mRNA [NM_001478]	1.6628	4.26904
NM_000270	PNP	NM_000270 || PNP || Homo sapiens purine nucleoside phosphorylase (PNP), mRNA [NM_000270]	1.66174	4.84279
NR_036500	FOXN3-AS1	NR_036500 || FOXN3-AS1 || Homo sapiens FOXN3 antisense RNA 1 (FOXN3-AS1), long non-coding RNA [NR_036500]	1.65271	7.61793
NM_153353	LRRC34	NM_153353 || LRRC34 || Homo sapiens leucine rich repeat containing 34 (LRRC34), transcript variant 3, mRNA [NM_153353]	1.64982	9.1701
NM_005562	LAMC2	NM_005562 || LAMC2 || Homo sapiens laminin, gamma 2 (LAMC2), transcript variant 1, mRNA [NM_005562]	1.64975	8.36062
NM_014178	STXBP6	NM_014178 || STXBP6 || Homo sapiens syntaxin binding protein 6 (amisyn) (STXBP6), mRNA [NM_014178]	1.64877	5.81181
TCONS_l2_00025960	XLOC_l2_013458	TCONS_l2_00025960 || XLOC_l2_013458 || BROAD Institute lincRNA (XLOC_l2_013458), lincRNA [TCONS_l2_00025960]	1.64367	8.29805
NM_016113	TRPV2	NM_016113 || TRPV2 || Homo sapiens transient receptor potential cation channel, subfamily V, member 2 (TRPV2), mRNA [NM_016113]	1.64339	6.79516
NM_005328	HAS2	NM_005328 || HAS2 || Homo sapiens hyaluronan synthase 2 (HAS2), mRNA [NM_005328]	1.64236	6.42693
NM_000245	MET	NM_000245 || MET || Homo sapiens MET proto-oncogene, receptor tyrosine kinase (MET), transcript variant 2, mRNA [NM_000245]	1.64019	4.26904
NM_001018116	MURC	NM_001018116 || MURC || Homo sapiens muscle-related coiled-coil protein (MURC), mRNA [NM_001018116]	1.63632	8.36062
NM_052966	FAM129A	NM_052966 || FAM129A || Homo sapiens family with sequence similarity 129, member A (FAM129A), mRNA [NM_052966]	1.63449	0
NM_178122	STPG1	NM_178122 || STPG1 || Homo sapiens sperm-tail PG-rich repeat containing 1 (STPG1), transcript variant 3, mRNA [NM_178122]	1.63368	6.10722
NM_021101	CLDN1	NM_021101 || CLDN1 || Homo sapiens claudin 1 (CLDN1), mRNA [NM_021101]	1.63367	3.2164
NM_001110792	MECP2	NM_001110792 || MECP2 || Homo sapiens methyl CpG binding protein 2 (MECP2), transcript variant 2, mRNA [NM_001110792]	1.62729	7.13727
NM_002852	PTX3	NM_002852 || PTX3 || Homo sapiens pentraxin 3, long (PTX3), mRNA [NM_002852]	1.62674	2.65308
XR_425104	LOC102723817	XR_425104 || LOC102723817 || PREDICTED: Homo sapiens uncharacterized LOC102723817 (LOC102723817), ncRNA [XR_425104]	1.62546	9.26488
BX445743		BX445743 || || BX445743 Homo sapiens T CELLS (JURKAT CELL LINE) Homo sapiens cDNA clone CS0DH002YB13 3-PRIME, mRNA sequence [BX445743]	1.62333	8.92023
NM_001012967	DDX60L	NM_001012967 || DDX60L || Homo sapiens DEAD (Asp-Glu-Ala-Asp) box polypeptide 60-like (DDX60L), transcript variant 1, mRNA [NM_001012967]	1.62292	2.92582
NM_001257291	SLC9A7	NM_001257291 || SLC9A7 || Homo sapiens solute carrier family 9, subfamily A (NHE7, cation proton antiporter 7), member 7 (SLC9A7), transcript variant 1, mRNA [NM_001257291]	1.62114	6.13926
lnc-MSRB3-2:2	lnc-MSRB3-2	lnc-MSRB3-2:2 || lnc-MSRB3-2 || LNCipedia lincRNA (lnc-MSRB3-2), lincRNA [lnc-MSRB3-2:2]	1.62099	9.1701
lnc-GPR137C-1:1	lnc-GPR137C-1	lnc-GPR137C-1:1 || lnc-GPR137C-1 || LNCipedia lincRNA (lnc-GPR137C-1), lincRNA [lnc-GPR137C-1:1]	1.62027	7.61793
NR_037166	LOC100129518	NR_037166 || LOC100129518 || Homo sapiens uncharacterized LOC100129518 (LOC100129518), long non-coding RNA [NR_037166]	1.61907	5.09506
NM_001199012	STPG1	NM_001199012 || STPG1 || Homo sapiens sperm-tail PG-rich repeat containing 1 (STPG1), transcript variant 2, mRNA [NM_001199012]	1.61849	5.09506
NM_002867	RAB3B	NM_002867 || RAB3B || Homo sapiens RAB3B, member RAS oncogene family (RAB3B), mRNA [NM_002867]	1.61538	9.1701
NM_032892	FRMD5	NM_032892 || FRMD5 || Homo sapiens FERM domain containing 5 (FRMD5), transcript variant 2, mRNA [NM_032892]	1.61377	9.33288
NM_173567	EPHX4	NM_173567 || EPHX4 || Homo sapiens epoxide hydrolase 4 (EPHX4), mRNA [NM_173567]	1.61216	8.04245
NM_004472	FOXD1	NM_004472 || FOXD1 || Homo sapiens forkhead box D1 (FOXD1), mRNA [NM_004472]	1.60757	4.842
NM_001267571	TBC1D2	NM_001267571 || TBC1D2 || Homo sapiens TBC1 domain family, member 2 (TBC1D2), transcript variant 1, mRNA [NM_001267571]	1.60318	3.34469
NM_022361	POPDC3	NM_022361 || POPDC3 || Homo sapiens popeye domain containing 3 (POPDC3), transcript variant 1, mRNA [NM_022361]	1.60207	8.32941
NR_027791	MIR99AHG	NR_027791 || MIR99AHG || Homo sapiens mir-99a-let-7c cluster host gene (non-protein coding) (MIR99AHG), transcript variant 2, long non-coding RNA [NR_027791]	1.60156	9.1701
NM_001278458	COBLL1	NM_001278458 || COBLL1 || Homo sapiens cordon-bleu WH2 repeat protein-like 1 (COBLL1), transcript variant 1, mRNA [NM_001278458]	1.59977	7.51789
NM_001031628	SMAGP	NM_001031628 || SMAGP || Homo sapiens small cell adhesion glycoprotein (SMAGP), transcript variant 1, mRNA [NM_001031628]	1.59616	6.20306
ENST00000420096		ENST00000420096 || || Unknown	1.59456	9.26488
NM_006931	SLC2A3	NM_006931 || SLC2A3 || Homo sapiens solute carrier family 2 (facilitated glucose transporter), member 3 (SLC2A3), mRNA [NM_006931]	1.59018	7.3702
NM_001013398	IGFBP3	NM_001013398 || IGFBP3 || Homo sapiens insulin-like growth factor binding protein 3 (IGFBP3), transcript variant 1, mRNA [NM_001013398]	1.586	5.28675
lnc-C3orf52-1:1	lnc-C3orf52-1	lnc-C3orf52-1:1 || lnc-C3orf52-1 || Homo sapiens cDNA FLJ35137 fis, clone PLACE6009419. [AK092456]	1.58518	0
ENST00000453790		ENST00000453790 || || RST5306 Athersys RAGE Library Homo sapiens cDNA, mRNA sequence [BG186343]	1.58511	5.34774
NM_001740	CALB2	NM_001740 || CALB2 || Homo sapiens calbindin 2 (CALB2), transcript variant CALB2, mRNA [NM_001740]	1.58386	9.15556
NM_001946	DUSP6	NM_001946 || DUSP6 || Homo sapiens dual specificity phosphatase 6 (DUSP6), transcript variant 1, mRNA [NM_001946]	1.58282	4.55917
ENST00000334003	GSAP	ENST00000334003 || GSAP || gamma-secretase activating protein [Source:HGNC Symbol;Acc:HGNC:28042] [ENST00000334003]	1.57696	9.86742
ENST00000548488		ENST00000548488 || || Homo sapiens mRNA; cDNA DKFZp564C1964 (from clone DKFZp564C1964). [AL137575]	1.57604	7.60269
NM_199280	FAM179A	NM_199280 || FAM179A || Homo sapiens family with sequence similarity 179, member A (FAM179A), mRNA [NM_199280]	1.57356	8.29805
lnc-YIF1A-6:1	lnc-YIF1A-6	lnc-YIF1A-6:1 || lnc-YIF1A-6 || ALU1_HUMAN (P39188) Alu subfamily J sequence contamination warning entry, partial (7%) [THC2725708]	1.57347	5.28675
NR_103548	LUCAT1	NR_103548 || LUCAT1 || Homo sapiens lung cancer associated transcript 1 (non-protein coding) (LUCAT1), transcript variant 1, long non-coding RNA [NR_103548]	1.56795	6.5831
ENST00000423924	LOC100996557	ENST00000423924 || LOC100996557 || PREDICTED: Homo sapiens uncharacterized LOC100996557 (LOC100996557), ncRNA [XR_158849]	1.56632	9.7153
NM_020183	ARNTL2	NM_020183 || ARNTL2 || Homo sapiens aryl hydrocarbon receptor nuclear translocator-like 2 (ARNTL2), transcript variant 1, mRNA [NM_020183]	1.56604	9.5093
ENST00000454475		ENST00000454475 || || keratin 18 pseudogene 26 [Source:HGNC Symbol;Acc:HGNC:33395] [ENST00000454475]	1.56468	4.20951
NM_004419	DUSP5	NM_004419 || DUSP5 || Homo sapiens dual specificity phosphatase 5 (DUSP5), mRNA [NM_004419]	1.56343	4.84279
NM_001172780	LRRC34	NM_001172780 || LRRC34 || Homo sapiens leucine rich repeat containing 34 (LRRC34), transcript variant 1, mRNA [NM_001172780]	1.56023	9.86742
NM_005603	ATP8B1	NM_005603 || ATP8B1 || Homo sapiens ATPase, aminophospholipid transporter, class I, type 8B, member 1 (ATP8B1), mRNA [NM_005603]	1.55979	3.01022
NM_033300	LRP8	NM_033300 || LRP8 || Homo sapiens low density lipoprotein receptor-related protein 8, apolipoprotein e receptor (LRP8), transcript variant 2, mRNA [NM_033300]	1.55664	7.74997
NR_110515	LOC100506271	NR_110515 || LOC100506271 || Homo sapiens uncharacterized LOC100506271 (LOC100506271), long non-coding RNA [NR_110515]	1.55425	6.12828
NM_000527	LDLR	NM_000527 || LDLR || Homo sapiens low density lipoprotein receptor (LDLR), transcript variant 1, mRNA [NM_000527]	1.55383	9.33288
NM_001114357	C4orf47	NM_001114357 || C4orf47 || Homo sapiens chromosome 4 open reading frame 47 (C4orf47), mRNA [NM_001114357]	1.55338	3.32629
NM_032744	ADTRP	NM_032744 || ADTRP || Homo sapiens androgen-dependent TFPI-regulating protein (ADTRP), transcript variant 2, mRNA [NM_032744]	1.55333	9.5093
NM_001285486	NEURL3	NM_001285486 || NEURL3 || Homo sapiens neuralized E3 ubiquitin protein ligase 3 (NEURL3), transcript variant 2, mRNA [NM_001285486]	1.54983	5.8853
NM_001975	ENO2	NM_001975 || ENO2 || Homo sapiens enolase 2 (gamma, neuronal) (ENO2), mRNA [NM_001975]	1.54932	7.20939
NM_182757	RNF144B	NM_182757 || RNF144B || Homo sapiens ring finger protein 144B (RNF144B), mRNA [NM_182757]	1.54847	9.39354
NM_203422	LRRN4CL	NM_203422 || LRRN4CL || Homo sapiens LRRN4 C-terminal like (LRRN4CL), mRNA [NM_203422]	1.54777	3.31931
NM_000403	GALE	NM_000403 || GALE || Homo sapiens UDP-galactose-4-epimerase (GALE), transcript variant 1, mRNA [NM_000403]	1.5467	8.12837
NM_002064	GLRX	NM_002064 || GLRX || Homo sapiens glutaredoxin (thioltransferase) (GLRX), transcript variant 1, mRNA [NM_002064]	1.54662	5.70479
NM_003379	EZR	NM_003379 || EZR || Homo sapiens ezrin (EZR), transcript variant 1, mRNA [NM_003379]	1.54536	3.6635
NM_006670	TPBG	NM_006670 || TPBG || Homo sapiens trophoblast glycoprotein (TPBG), transcript variant 1, mRNA [NM_006670]	1.54156	4.74689
XR_424996	LOC102724352	XR_424996 || LOC102724352 || PREDICTED: Homo sapiens uncharacterized LOC102724352 (LOC102724352), ncRNA [XR_424996]	1.54063	5.24329
NM_012415	RAD54B	NM_012415 || RAD54B || Homo sapiens RAD54 homolog B (S. cerevisiae) (RAD54B), transcript variant 1, mRNA [NM_012415]	1.53862	8.12837
NM_032591	SLC9A7	NM_032591 || SLC9A7 || Homo sapiens solute carrier family 9, subfamily A (NHE7, cation proton antiporter 7), member 7 (SLC9A7), transcript variant 2, mRNA [NM_032591]	1.53858	9.41364
NM_206866	BACH1	NM_206866 || BACH1 || Homo sapiens BTB and CNC homology 1, basic leucine zipper transcription factor 1 (BACH1), transcript variant 1, mRNA [NM_206866]	1.53722	3.21979
NR_002966	SNORA30	NR_002966 || SNORA30 || Homo sapiens small nucleolar RNA, H/ACA box 30 (SNORA30), small nucleolar RNA [NR_002966]	1.53695	7.65954
NM_025130	HKDC1	NM_025130 || HKDC1 || Homo sapiens hexokinase domain containing 1 (HKDC1), mRNA [NM_025130]	1.53642	9.7153
AI830629		AI830629 || || wj10a11.x1 NCI_CGAP_Kid12 Homo sapiens cDNA clone IMAGE:2402396 3', mRNA sequence [AI830629]	1.5321	9.26488
NR_028334	KRT18P55	NR_028334 || KRT18P55 || Homo sapiens keratin 18 pseudogene 55 (KRT18P55), non-coding RNA [NR_028334]	1.52723	4.42032
NM_018342	TMEM144	NM_018342 || TMEM144 || Homo sapiens transmembrane protein 144 (TMEM144), mRNA [NM_018342]	1.52638	7.72687
NM_173039	AQP11	NM_173039 || AQP11 || Homo sapiens aquaporin 11 (AQP11), mRNA [NM_173039]	1.52515	8.36883
NM_001300952	SRGAP2	NM_001300952 || SRGAP2 || Homo sapiens SLIT-ROBO Rho GTPase activating protein 2 (SRGAP2), transcript variant 4, mRNA [NM_001300952]	1.5245	6.20306
NM_002517	NPAS1	NM_002517 || NPAS1 || Homo sapiens neuronal PAS domain protein 1 (NPAS1), mRNA [NM_002517]	1.52348	9.33288
NM_016341	PLCE1	NM_016341 || PLCE1 || Homo sapiens phospholipase C, epsilon 1 (PLCE1), transcript variant 1, mRNA [NM_016341]	1.52338	4.84279
ENST00000531798		ENST00000531798 || || Unknown	1.52095	7.16556
NM_032121	MAGT1	NM_032121 || MAGT1 || Homo sapiens magnesium transporter 1 (MAGT1), mRNA [NM_032121]	1.52067	4.26904
NM_001038603	MARVELD2	NM_001038603 || MARVELD2 || Homo sapiens MARVEL domain containing 2 (MARVELD2), transcript variant 1, mRNA [NM_001038603]	1.51955	8.70384
NM_147161	ACOT11	NM_147161 || ACOT11 || Homo sapiens acyl-CoA thioesterase 11 (ACOT11), transcript variant 2, mRNA [NM_147161]	1.51934	8.80957
lnc-FAM131B-1:2	lnc-FAM131B-1	lnc-FAM131B-1:2 || lnc-FAM131B-1 || Homo sapiens primary neuroblastoma cDNA, clone:Nbla10687, full insert sequence. [AB074268]	1.51577	6.97162
NM_003873	NRP1	NM_003873 || NRP1 || Homo sapiens neuropilin 1 (NRP1), transcript variant 1, mRNA [NM_003873]	1.51565	9.86742
ENST00000606622		ENST00000606622 || || Homo sapiens cDNA FLJ36084 fis, clone TESTI2020029. [AK093403]	1.5146	8.92023
ENST00000584649		ENST00000584649 || || Unknown	1.5145	5.3363
NM_181610	KRTAP19-4	NM_181610 || KRTAP19-4 || Homo sapiens keratin associated protein 19-4 (KRTAP19-4), mRNA [NM_181610]	1.5131	4.42032
NM_002905	RDH5	NM_002905 || RDH5 || Homo sapiens retinol dehydrogenase 5 (11-cis/9-cis) (RDH5), transcript variant 2, mRNA [NM_002905]	1.51253	8.92023
NM_005438	FOSL1	NM_005438 || FOSL1 || Homo sapiens FOS-like antigen 1 (FOSL1), transcript variant 1, mRNA [NM_005438]	1.51212	5.70278
NM_175617	MT1E	NM_175617 || MT1E || Homo sapiens metallothionein 1E (MT1E), mRNA [NM_175617]	1.51094	6.87753
ENST00000434946		ENST00000434946 || || keratin 18 pseudogene 64 [Source:HGNC Symbol;Acc:HGNC:48891] [ENST00000434946]	1.50833	4.26904
ENST00000439811		ENST00000439811 || || keratin 18 pseudogene 65 [Source:HGNC Symbol;Acc:HGNC:48892] [ENST00000439811]	1.50782	3.06924
A_21_P0014877		A_21_P0014877 || unmapped	1.50555	7.42
A_33_P3251252		A_33_P3251252 || unmapped	1.50373	8.92023
NM_020170	NCLN	NM_020170 || NCLN || Homo sapiens nicalin (NCLN), mRNA [NM_020170]	1.50126	2.30193
NM_004362	CLGN	NM_004362 || CLGN || Homo sapiens calmegin (CLGN), transcript variant 1, mRNA [NM_004362]	1.50019	8.80957
NM_001128853	SRRT	NM_001128853 || SRRT || Homo sapiens serrate, RNA effector molecule (SRRT), transcript variant 4, mRNA [NM_001128853]	0.665866	9.7153
NM_000459	TEK	NM_000459 || TEK || Homo sapiens TEK tyrosine kinase, endothelial (TEK), transcript variant 1, mRNA [NM_000459]	0.658826	9.5093
ENST00000565523		ENST00000565523 || || Unknown	0.658499	7.48309
AK127669	LOC100130597	AK127669 || LOC100130597 || Homo sapiens cDNA FLJ45767 fis, clone NETRP2000439. [AK127669]	0.658146	8.29805
NM_001448	GPC4	NM_001448 || GPC4 || Homo sapiens glypican 4 (GPC4), mRNA [NM_001448]	0.65797	6.66617
XR_244481	LOC101928221	XR_244481 || LOC101928221 || PREDICTED: Homo sapiens uncharacterized LOC101928221 (LOC101928221), transcript variant X2, ncRNA [XR_244481]	0.657683	7.11249
NM_000962	PTGS1	NM_000962 || PTGS1 || Homo sapiens prostaglandin-endoperoxide synthase 1 (prostaglandin G/H synthase and cyclooxygenase) (PTGS1), transcript variant 1, mRNA [NM_000962]	0.657234	4.84832
NM_001093726	SEPP1	NM_001093726 || SEPP1 || Homo sapiens selenoprotein P, plasma, 1 (SEPP1), transcript variant 3, mRNA [NM_001093726]	0.656236	5.31434
NM_176895	PPAP2A	NM_176895 || PPAP2A || Homo sapiens phosphatidic acid phosphatase type 2A (PPAP2A), transcript variant 2, mRNA [NM_176895]	0.656009	3.1679
NM_198859	PRICKLE2	NM_198859 || PRICKLE2 || Homo sapiens prickle homolog 2 (Drosophila) (PRICKLE2), mRNA [NM_198859]	0.65547	5.37014
lnc-PLD6-1:1	lnc-PLD6-1	lnc-PLD6-1:1 || lnc-PLD6-1 || LNCipedia lincRNA (lnc-PLD6-1), lincRNA [lnc-PLD6-1:1]	0.655468	6.65003
NM_053064	GNG2	NM_053064 || GNG2 || Homo sapiens guanine nucleotide binding protein (G protein), gamma 2 (GNG2), transcript variant 1, mRNA [NM_053064]	0.653878	8.36883
NR_003664	SPDYE8P	NR_003664 || SPDYE8P || Homo sapiens speedy/RINGO cell cycle regulator family member E8, pseudogene (SPDYE8P), non-coding RNA [NR_003664]	0.652886	5.48592
lnc-BLID-1:18	lnc-BLID-1	lnc-BLID-1:18 || lnc-BLID-1 || LNCipedia lincRNA (lnc-BLID-1), lincRNA [lnc-BLID-1:18]	0.652439	9.7153
NM_031910	C1QTNF6	NM_031910 || C1QTNF6 || Homo sapiens C1q and tumor necrosis factor related protein 6 (C1QTNF6), transcript variant 1, mRNA [NM_031910]	0.652243	8.70384
NM_005386	NNAT	NM_005386 || NNAT || Homo sapiens neuronatin (NNAT), transcript variant 1, mRNA [NM_005386]	0.651768	3.10578
NM_001031853	INSC	NM_001031853 || INSC || Homo sapiens inscuteable homolog (Drosophila) (INSC), transcript variant 1, mRNA [NM_001031853]	0.651016	7.45388
NM_022158	FN3K	NM_022158 || FN3K || Homo sapiens fructosamine 3 kinase (FN3K), mRNA [NM_022158]	0.650085	8.36883
lnc-B4GALT7-1:1	lnc-B4GALT7-1	lnc-B4GALT7-1:1 || lnc-B4GALT7-1 || Homo sapiens cDNA FLJ42140 fis, clone TESTI2041734. [AK124134]	0.649164	7.20939
NM_053001	OSR2	NM_053001 || OSR2 || Homo sapiens odd-skipped related transciption factor 2 (OSR2), transcript variant 2, mRNA [NM_053001]	0.648493	3.32629
ENST00000416646		ENST00000416646 || || Unknown	0.647757	9.96827
NM_145071	CISH	NM_145071 || CISH || Homo sapiens cytokine inducible SH2-containing protein (CISH), transcript variant 2, mRNA [NM_145071]	0.646541	8.32941
NM_017664	ANKRD10	NM_017664 || ANKRD10 || Homo sapiens ankyrin repeat domain 10 (ANKRD10), transcript variant 1, mRNA [NM_017664]	0.645274	5.22643
NM_003956	CH25H	NM_003956 || CH25H || Homo sapiens cholesterol 25-hydroxylase (CH25H), mRNA [NM_003956]	0.643202	9.39354
NR_026861	LINC00473	NR_026861 || LINC00473 || Homo sapiens long intergenic non-protein coding RNA 473 (LINC00473), transcript variant 2, long non-coding RNA [NR_026861]	0.641858	8.02947
NM_152486	SAMD11	NM_152486 || SAMD11 || Homo sapiens sterile alpha motif domain containing 11 (SAMD11), mRNA [NM_152486]	0.641763	2.30193
NM_198194	STOM	NM_198194 || STOM || Homo sapiens stomatin (STOM), transcript variant 2, mRNA [NM_198194]	0.641271	4.87916
NM_198930	PYHIN1	NM_198930 || PYHIN1 || Homo sapiens pyrin and HIN domain family, member 1 (PYHIN1), transcript variant 4, mRNA [NM_198930]	0.64047	8.36062
ENST00000314088	HIST1H2AC	ENST00000314088 || HIST1H2AC || histone cluster 1, H2ac [Source:HGNC Symbol;Acc:HGNC:4733] [ENST00000314088]	0.640187	7.94
A_33_P3212700		A_33_P3212700 || unmapped	0.639895	8.88313
NR_026874	LOC100130417	NR_026874 || LOC100130417 || Homo sapiens uncharacterized LOC100130417 (LOC100130417), transcript variant 1, long non-coding RNA [NR_026874]	0.639172	9.41364
NM_001146227	RPS20	NM_001146227 || RPS20 || Homo sapiens ribosomal protein S20 (RPS20), transcript variant 1, mRNA [NM_001146227]	0.638404	2.82402
lnc-SPOPL-3:1	lnc-SPOPL-3	lnc-SPOPL-3:1 || lnc-SPOPL-3 || LNCipedia lincRNA (lnc-SPOPL-3), lincRNA [lnc-SPOPL-3:1]	0.637382	4.46561
NM_002089	CXCL2	NM_002089 || CXCL2 || Homo sapiens chemokine (C-X-C motif) ligand 2 (CXCL2), mRNA [NM_002089]	0.636765	6.67968
lnc-FBXO25-5:9	lnc-FBXO25-5	lnc-FBXO25-5:9 || lnc-FBXO25-5 || LNCipedia lincRNA (lnc-FBXO25-5), lincRNA [lnc-FBXO25-5:9]	0.63654	4.40569
ENST00000557393		ENST00000557393 || || Unknown	0.63639	9.41364
NM_000049	ASPA	NM_000049 || ASPA || Homo sapiens aspartoacylase (ASPA), transcript variant 1, mRNA [NM_000049]	0.635389	8.36062
NM_001565	CXCL10	NM_001565 || CXCL10 || Homo sapiens chemokine (C-X-C motif) ligand 10 (CXCL10), mRNA [NM_001565]	0.634398	8.80957
lnc-HAND2-2:1	lnc-HAND2-2	lnc-HAND2-2:1 || lnc-HAND2-2 || LNCipedia lincRNA (lnc-HAND2-2), lincRNA [lnc-HAND2-2:1]	0.634349	5.99183
NM_153631	HOXA3	NM_153631 || HOXA3 || Homo sapiens homeobox A3 (HOXA3), transcript variant 2, mRNA [NM_153631]	0.632186	4.59758
ENST00000413053		ENST00000413053 || || microRNA 194-2 [Source:HGNC Symbol;Acc:HGNC:31565] [ENST00000413053]	0.632058	9.33288
NM_032813	TMTC4	NM_032813 || TMTC4 || Homo sapiens transmembrane and tetratricopeptide repeat containing 4 (TMTC4), transcript variant 1, mRNA [NM_032813]	0.631655	9.1701
NM_004279	PMPCB	NM_004279 || PMPCB || Homo sapiens peptidase (mitochondrial processing) beta (PMPCB), mRNA [NM_004279]	0.627673	7.51789
NM_002736	PRKAR2B	NM_002736 || PRKAR2B || Homo sapiens protein kinase, cAMP-dependent, regulatory, type II, beta (PRKAR2B), mRNA [NM_002736]	0.627481	6.44003
NM_003598	TEAD2	NM_003598 || TEAD2 || Homo sapiens TEA domain family member 2 (TEAD2), transcript variant 5, mRNA [NM_003598]	0.627394	8.51872
NM_144711	KLHL23	NM_144711 || KLHL23 || Homo sapiens kelch-like family member 23 (KLHL23), mRNA [NM_144711]	0.626957	7.20939
ENST00000463835	TNFRSF14	ENST00000463835 || TNFRSF14 || tumor necrosis factor receptor superfamily, member 14 [Source:HGNC Symbol;Acc:HGNC:11912] [ENST00000463835]	0.626951	2.13452
NR_110301	ZNF503-AS2	NR_110301 || ZNF503-AS2 || Homo sapiens ZNF503 antisense RNA 2 (ZNF503-AS2), transcript variant 5, long non-coding RNA [NR_110301]	0.626632	8.29805
NR_002579	SNORD74	NR_002579 || SNORD74 || Homo sapiens small nucleolar RNA, C/D box 74 (SNORD74), small nucleolar RNA [NR_002579]	0.625662	9.86742
NM_024787	RNF122	NM_024787 || RNF122 || Homo sapiens ring finger protein 122 (RNF122), mRNA [NM_024787]	0.625527	7.45388
NM_005308	GRK5	NM_005308 || GRK5 || Homo sapiens G protein-coupled receptor kinase 5 (GRK5), mRNA [NM_005308]	0.623937	7.94
NR_027917	CTSL3P	NR_027917 || CTSL3P || Homo sapiens cathepsin L family member 3, pseudogene (CTSL3P), non-coding RNA [NR_027917]	0.621743	3.1679
NM_021205	RHOU	NM_021205 || RHOU || Homo sapiens ras homolog family member U (RHOU), transcript variant 1, mRNA [NM_021205]	0.621664	5.70278
NM_199235	COLEC11	NM_199235 || COLEC11 || Homo sapiens collectin sub-family member 11 (COLEC11), transcript variant 2, mRNA [NM_199235]	0.620644	5.58296
NM_015150	RFTN1	NM_015150 || RFTN1 || Homo sapiens raftlin, lipid raft linker 1 (RFTN1), mRNA [NM_015150]	0.619337	7.94
NM_001101676	SAMD12	NM_001101676 || SAMD12 || Homo sapiens sterile alpha motif domain containing 12 (SAMD12), transcript variant 1, mRNA [NM_001101676]	0.619221	4.39246
NM_002291	LAMB1	NM_002291 || LAMB1 || Homo sapiens laminin, beta 1 (LAMB1), mRNA [NM_002291]	0.619071	8.29805
NM_006622	PLK2	NM_006622 || PLK2 || Homo sapiens polo-like kinase 2 (PLK2), transcript variant 1, mRNA [NM_006622]	0.616629	5.00195
NM_001144823	DENND4A	NM_001144823 || DENND4A || Homo sapiens DENN/MADD domain containing 4A (DENND4A), transcript variant 1, mRNA [NM_001144823]	0.616373	5.84009
NM_003107	SOX4	NM_003107 || SOX4 || Homo sapiens SRY (sex determining region Y)-box 4 (SOX4), mRNA [NM_003107]	0.61603	6.79516
NR_104626	LOC101928370	NR_104626 || LOC101928370 || Homo sapiens uncharacterized LOC101928370 (LOC101928370), long non-coding RNA [NR_104626]	0.615783	8.36062
NM_014452	TNFRSF21	NM_014452 || TNFRSF21 || Homo sapiens tumor necrosis factor receptor superfamily, member 21 (TNFRSF21), mRNA [NM_014452]	0.61564	0
NM_002658	PLAU	NM_002658 || PLAU || Homo sapiens plasminogen activator, urokinase (PLAU), transcript variant 1, mRNA [NM_002658]	0.614503	6.66369
NM_020182	PMEPA1	NM_020182 || PMEPA1 || Homo sapiens prostate transmembrane protein, androgen induced 1 (PMEPA1), transcript variant 1, mRNA [NM_020182]	0.612188	7.60269
NR_103486	DNM3OS	NR_103486 || DNM3OS || Homo sapiens DNM3 opposite strand/antisense RNA (DNM3OS), transcript variant 2, long non-coding RNA [NR_103486]	0.612131	7.11249
ENST00000508918	LDB2	ENST00000508918 || LDB2 || LIM domain binding 2 [Source:HGNC Symbol;Acc:HGNC:6533] [ENST00000508918]	0.61181	9.67031
NM_002338	LSAMP	NM_002338 || LSAMP || Homo sapiens limbic system-associated membrane protein (LSAMP), mRNA [NM_002338]	0.610835	2.82402
NM_001130518	CSGALNACT1	NM_001130518 || CSGALNACT1 || Homo sapiens chondroitin sulfate N-acetylgalactosaminyltransferase 1 (CSGALNACT1), transcript variant 1, mRNA [NM_001130518]	0.610503	9.5093
NM_020808	SIPA1L2	NM_020808 || SIPA1L2 || Homo sapiens signal-induced proliferation-associated 1 like 2 (SIPA1L2), mRNA [NM_020808]	0.610252	6.23158
lnc-CCDC117-1:4	lnc-CCDC117-1	lnc-CCDC117-1:4 || lnc-CCDC117-1 || LNCipedia lincRNA (lnc-CCDC117-1), lincRNA [lnc-CCDC117-1:4]	0.609302	9.5093
NM_001206	KLF9	NM_001206 || KLF9 || Homo sapiens Kruppel-like factor 9 (KLF9), mRNA [NM_001206]	0.607683	5.35914
lnc-CBX2-1:1	lnc-CBX2-1	lnc-CBX2-1:1 || lnc-CBX2-1 || Q96EX9_HUMAN (Q96EX9) C14orf78 protein (Fragment), partial (4%) [THC2643699]	0.606039	5.3363
NM_018659	CYTL1	NM_018659 || CYTL1 || Homo sapiens cytokine-like 1 (CYTL1), mRNA [NM_018659]	0.606004	3.1679
NM_006010	MANF	NM_006010 || MANF || Homo sapiens mesencephalic astrocyte-derived neurotrophic factor (MANF), mRNA [NM_006010]	0.604798	4.39246
NM_001098478	HLA-F	NM_001098478 || HLA-F || Homo sapiens major histocompatibility complex, class I, F (HLA-F), transcript variant 3, mRNA [NM_001098478]	0.603516	8.04245
NM_199327	SPRY1	NM_199327 || SPRY1 || Homo sapiens sprouty homolog 1, antagonist of FGF signaling (Drosophila) (SPRY1), transcript variant 2, mRNA [NM_199327]	0.601944	2.30193
NM_001085375	C1orf226	NM_001085375 || C1orf226 || Homo sapiens chromosome 1 open reading frame 226 (C1orf226), transcript variant 2, mRNA [NM_001085375]	0.60126	7.42
NM_001814	CTSC	NM_001814 || CTSC || Homo sapiens cathepsin C (CTSC), transcript variant 1, mRNA [NM_001814]	0.601065	8.92023
NM_002508	NID1	NM_002508 || NID1 || Homo sapiens nidogen 1 (NID1), mRNA [NM_002508]	0.600805	8.52918
NM_002048	GAS1	NM_002048 || GAS1 || Homo sapiens growth arrest-specific 1 (GAS1), mRNA [NM_002048]	0.600712	5.25571
ENST00000435407		ENST00000435407 || || Unknown	0.600648	3.68875
NM_173200	NR4A3	NM_173200 || NR4A3 || Homo sapiens nuclear receptor subfamily 4, group A, member 3 (NR4A3), transcript variant 3, mRNA [NM_173200]	0.60045	6.20306
NM_172244	SGCD	NM_172244 || SGCD || Homo sapiens sarcoglycan, delta (35kDa dystrophin-associated glycoprotein) (SGCD), transcript variant 2, mRNA [NM_172244]	0.599727	5.62662
NM_015026	MON2	NM_015026 || MON2 || Homo sapiens MON2 homolog (S. cerevisiae) (MON2), transcript variant 1, mRNA [NM_015026]	0.59885	5.76841
NM_015009	PDZRN3	NM_015009 || PDZRN3 || Homo sapiens PDZ domain containing ring finger 3 (PDZRN3), transcript variant 1, mRNA [NM_015009]	0.597973	7.13727
NM_206919	ARL9	NM_206919 || ARL9 || Homo sapiens ADP-ribosylation factor-like 9 (ARL9), mRNA [NM_206919]	0.597949	9.7153
lnc-GPR20-1:1	lnc-GPR20-1	lnc-GPR20-1:1 || lnc-GPR20-1 || LNCipedia lincRNA (lnc-GPR20-1), lincRNA [lnc-GPR20-1:1]	0.597334	3.34469
NM_006206	PDGFRA	NM_006206 || PDGFRA || Homo sapiens platelet-derived growth factor receptor, alpha polypeptide (PDGFRA), mRNA [NM_006206]	0.596503	4.79178
A_33_P3250263		A_33_P3250263 || unmapped	0.596094	6.20445
NM_022068	PIEZO2	NM_022068 || PIEZO2 || Homo sapiens piezo-type mechanosensitive ion channel component 2 (PIEZO2), mRNA [NM_022068]	0.595686	7.42
NM_004311	ARL3	NM_004311 || ARL3 || Homo sapiens ADP-ribosylation factor-like 3 (ARL3), mRNA [NM_004311]	0.595456	3.32629
NM_014988	LIMCH1	NM_014988 || LIMCH1 || Homo sapiens LIM and calponin homology domains 1 (LIMCH1), transcript variant 1, mRNA [NM_014988]	0.593414	7.42
NM_005261	GEM	NM_005261 || GEM || Homo sapiens GTP binding protein overexpressed in skeletal muscle (GEM), transcript variant 1, mRNA [NM_005261]	0.591424	9.7153
NM_173582	PGM2L1	NM_173582 || PGM2L1 || Homo sapiens phosphoglucomutase 2-like 1 (PGM2L1), mRNA [NM_173582]	0.591231	5.58302
NR_110868	LOC101929767	NR_110868 || LOC101929767 || Homo sapiens uncharacterized LOC101929767 (LOC101929767), long non-coding RNA [NR_110868]	0.587723	8.22069
NM_017784	OSBPL10	NM_017784 || OSBPL10 || Homo sapiens oxysterol binding protein-like 10 (OSBPL10), transcript variant 1, mRNA [NM_017784]	0.585872	7.51789
lnc-NRSN1-3:2	lnc-NRSN1-3	lnc-NRSN1-3:2 || lnc-NRSN1-3 || LNCipedia lincRNA (lnc-NRSN1-3), lincRNA [lnc-NRSN1-3:2]	0.585555	9.26488
NM_005595	NFIA	NM_005595 || NFIA || Homo sapiens nuclear factor I/A (NFIA), transcript variant 2, mRNA [NM_005595]	0.583946	5.62662
NM_033439	IL33	NM_033439 || IL33 || Homo sapiens interleukin 33 (IL33), transcript variant 1, mRNA [NM_033439]	0.583728	7.65954
NM_001010000	ARHGAP28	NM_001010000 || ARHGAP28 || Homo sapiens Rho GTPase activating protein 28 (ARHGAP28), mRNA [NM_001010000]	0.578407	4.29869
ENST00000515519	LOC255187	ENST00000515519 || LOC255187 || Unknown	0.577433	9.80229
NM_006714	SMPDL3A	NM_006714 || SMPDL3A || Homo sapiens sphingomyelin phosphodiesterase, acid-like 3A (SMPDL3A), transcript variant 1, mRNA [NM_006714]	0.576505	4.86172
NM_000418	IL4R	NM_000418 || IL4R || Homo sapiens interleukin 4 receptor (IL4R), transcript variant 1, mRNA [NM_000418]	0.576106	4.06982
NR_120659	LINC01518	NR_120659 || LINC01518 || Homo sapiens long intergenic non-protein coding RNA 1518 (LINC01518), transcript variant 1, long non-coding RNA [NR_120659]	0.575785	7.94
NM_004613	TGM2	NM_004613 || TGM2 || Homo sapiens transglutaminase 2 (TGM2), transcript variant 1, mRNA [NM_004613]	0.573862	5.48815
ENST00000430247		ENST00000430247 || || PREDICTED: Homo sapiens uncharacterized LOC101928011 (LOC101928011), ncRNA [XR_244302]	0.573015	7.42
NM_033035	TSLP	NM_033035 || TSLP || Homo sapiens thymic stromal lymphopoietin (TSLP), transcript variant 1, mRNA [NM_033035]	0.572928	8.22069
NM_005460	SNCAIP	NM_005460 || SNCAIP || Homo sapiens synuclein, alpha interacting protein (SNCAIP), transcript variant 1, mRNA [NM_005460]	0.571607	6.42693
lnc-ACTR2-1:1	lnc-ACTR2-1	lnc-ACTR2-1:1 || lnc-ACTR2-1 || LNCipedia lincRNA (lnc-ACTR2-1), lincRNA [lnc-ACTR2-1:1]	0.57117	4.29869
TCONS_l2_00018461	XLOC_l2_009639	TCONS_l2_00018461 || XLOC_l2_009639 || BROAD Institute lincRNA (XLOC_l2_009639), lincRNA [TCONS_l2_00018461]	0.570696	9.41364
XM_006719177	LOC102724747	XM_006719177 || LOC102724747 || PREDICTED: Homo sapiens ovostatin homolog 2-like (LOC102724747), partial mRNA [XM_006719177]	0.568458	7.94
NM_018945	PDE7B	NM_018945 || PDE7B || Homo sapiens phosphodiesterase 7B (PDE7B), mRNA [NM_018945]	0.567407	4.83581
NM_001204375	NPR3	NM_001204375 || NPR3 || Homo sapiens natriuretic peptide receptor 3 (NPR3), transcript variant 1, mRNA [NM_001204375]	0.56708	7.13727
NM_001037341	PDE4B	NM_001037341 || PDE4B || Homo sapiens phosphodiesterase 4B, cAMP-specific (PDE4B), transcript variant d, mRNA [NM_001037341]	0.566285	4.86172
lnc-DCT-1:1	lnc-DCT-1	lnc-DCT-1:1 || lnc-DCT-1 || LNCipedia lincRNA (lnc-DCT-1), lincRNA [lnc-DCT-1:1]	0.5662	4.96462
NM_000337	SGCD	NM_000337 || SGCD || Homo sapiens sarcoglycan, delta (35kDa dystrophin-associated glycoprotein) (SGCD), transcript variant 1, mRNA [NM_000337]	0.565443	7.94
NM_000864	HTR1D	NM_000864 || HTR1D || Homo sapiens 5-hydroxytryptamine (serotonin) receptor 1D, G protein-coupled (HTR1D), mRNA [NM_000864]	0.564386	8.51872
NM_033641	COL4A6	NM_033641 || COL4A6 || Homo sapiens collagen, type IV, alpha 6 (COL4A6), transcript variant B, mRNA [NM_033641]	0.564112	9.39354
lnc-ASXL1-2:1	lnc-ASXL1-2	lnc-ASXL1-2:1 || lnc-ASXL1-2 || Homo sapiens mRNA; cDNA DKFZp564J1762 (from clone DKFZp564J1762). [AL080086]	0.563954	5.62662
NM_001202234	NR4A1	NM_001202234 || NR4A1 || Homo sapiens nuclear receptor subfamily 4, group A, member 1 (NR4A1), transcript variant 4, mRNA [NM_001202234]	0.563355	8.04245
NM_018487	TMEM176A	NM_018487 || TMEM176A || Homo sapiens transmembrane protein 176A (TMEM176A), mRNA [NM_018487]	0.559849	6.20445
NM_001039762	FAM196A	NM_001039762 || FAM196A || Homo sapiens family with sequence similarity 196, member A (FAM196A), mRNA [NM_001039762]	0.557172	8.51872
NM_173354	SIK1	NM_173354 || SIK1 || Homo sapiens salt-inducible kinase 1 (SIK1), mRNA [NM_173354]	0.555488	4.84832
NM_002230	JUP	NM_002230 || JUP || Homo sapiens junction plakoglobin (JUP), transcript variant 1, mRNA [NM_002230]	0.554011	5.22643
ENST00000580242		ENST00000580242 || || Unknown	0.552086	8.29805
NM_001297705	LPHN2	NM_001297705 || LPHN2 || Homo sapiens latrophilin 2 (LPHN2), transcript variant 3, mRNA [NM_001297705]	0.551868	6.65003
NM_001002294	FMO3	NM_001002294 || FMO3 || Homo sapiens flavin containing monooxygenase 3 (FMO3), transcript variant 2, mRNA [NM_001002294]	0.550871	7.61793
NM_004385	VCAN	NM_004385 || VCAN || Homo sapiens versican (VCAN), transcript variant 1, mRNA [NM_004385]	0.550084	8.36883
ENST00000414404	LOC644838	ENST00000414404 || LOC644838 || Unknown	0.54925	9.10717
NM_030636	EEPD1	NM_030636 || EEPD1 || Homo sapiens endonuclease/exonuclease/phosphatase family domain containing 1 (EEPD1), mRNA [NM_030636]	0.548728	8.04245
NM_015000	STK38L	NM_015000 || STK38L || Homo sapiens serine/threonine kinase 38 like (STK38L), mRNA [NM_015000]	0.544741	7.94
NM_153000	APCDD1	NM_153000 || APCDD1 || Homo sapiens adenomatosis polyposis coli down-regulated 1 (APCDD1), mRNA [NM_153000]	0.543147	9.33288
NM_002425	MMP10	NM_002425 || MMP10 || Homo sapiens matrix metallopeptidase 10 (stromelysin 2) (MMP10), mRNA [NM_002425]	0.542411	5.35914
lnc-LRTM2-2:1	lnc-LRTM2-2	lnc-LRTM2-2:1 || lnc-LRTM2-2 || 603077963F1 NIH_MGC_119 Homo sapiens cDNA clone IMAGE:5169974 5', mRNA sequence [BI827305]	0.542382	2.00681
NM_022751	GAREM	NM_022751 || GAREM || Homo sapiens GRB2 associated, regulator of MAPK1 (GAREM), transcript variant 2, mRNA [NM_022751]	0.539188	7.60269
NM_153708	RTP1	NM_153708 || RTP1 || Homo sapiens receptor (chemosensory) transporter protein 1 (RTP1), mRNA [NM_153708]	0.537823	8.92023
NM_130386	COLEC12	NM_130386 || COLEC12 || Homo sapiens collectin sub-family member 12 (COLEC12), mRNA [NM_130386]	0.535358	6.34782
NM_021073	BMP5	NM_021073 || BMP5 || Homo sapiens bone morphogenetic protein 5 (BMP5), mRNA [NM_021073]	0.530952	4.77639
NM_002118	HLA-DMB	NM_002118 || HLA-DMB || Homo sapiens major histocompatibility complex, class II, DM beta (HLA-DMB), mRNA [NM_002118]	0.527709	6.97162
NM_020311	ACKR3	NM_020311 || ACKR3 || Homo sapiens atypical chemokine receptor 3 (ACKR3), mRNA [NM_020311]	0.521505	3.34469
NM_080607	VSTM2L	NM_080607 || VSTM2L || Homo sapiens V-set and transmembrane domain containing 2 like (VSTM2L), mRNA [NM_080607]	0.521302	3.28993
NM_032622	LNX1	NM_032622 || LNX1 || Homo sapiens ligand of numb-protein X 1, E3 ubiquitin protein ligase (LNX1), transcript variant 2, mRNA [NM_032622]	0.518437	8.1697
lnc-BDKRB1-1:1	lnc-BDKRB1-1	lnc-BDKRB1-1:1 || lnc-BDKRB1-1 || LNCipedia lincRNA (lnc-BDKRB1-1), lincRNA [lnc-BDKRB1-1:1]	0.517481	7.94
NM_138444	KCTD12	NM_138444 || KCTD12 || Homo sapiens potassium channel tetramerization domain containing 12 (KCTD12), mRNA [NM_138444]	0.516829	5.8853
NM_001077244	GRIA4	NM_001077244 || GRIA4 || Homo sapiens glutamate receptor, ionotropic, AMPA 4 (GRIA4), transcript variant 3, mRNA [NM_001077244]	0.515645	4.84012
NM_004778	PTGDR2	NM_004778 || PTGDR2 || Homo sapiens prostaglandin D2 receptor 2 (PTGDR2), mRNA [NM_004778]	0.515439	9.33288
NM_002581	PAPPA	NM_002581 || PAPPA || Homo sapiens pregnancy-associated plasma protein A, pappalysin 1 (PAPPA), mRNA [NM_002581]	0.513569	5.62662
NM_022137	SMOC1	NM_022137 || SMOC1 || Homo sapiens SPARC related modular calcium binding 1 (SMOC1), transcript variant 2, mRNA [NM_022137]	0.511822	3.36436
NM_004469	FIGF	NM_004469 || FIGF || Homo sapiens c-fos induced growth factor (vascular endothelial growth factor D) (FIGF), mRNA [NM_004469]	0.510447	8.91488
NM_013313	YPEL1	NM_013313 || YPEL1 || Homo sapiens yippee-like 1 (Drosophila) (YPEL1), mRNA [NM_013313]	0.50291	4.06982
TCONS_l2_00030903	XLOC_l2_015894	TCONS_l2_00030903 || XLOC_l2_015894 || BROAD Institute lincRNA (XLOC_l2_015894), lincRNA [TCONS_l2_00030903]	0.500051	4.78182
NM_001204088	MINOS1-NBL1	NM_001204088 || MINOS1-NBL1 || Homo sapiens MINOS1-NBL1 readthrough (MINOS1-NBL1), transcript variant 1, mRNA [NM_001204088]	0.499618	7.61793
NM_002214	ITGB8	NM_002214 || ITGB8 || Homo sapiens integrin, beta 8 (ITGB8), mRNA [NM_002214]	0.499617	9.67031
NM_000667	ADH1A	NM_000667 || ADH1A || Homo sapiens alcohol dehydrogenase 1A (class I), alpha polypeptide (ADH1A), mRNA [NM_000667]	0.498478	5.8853
NM_133455	EMID1	NM_133455 || EMID1 || Homo sapiens EMI domain containing 1 (EMID1), transcript variant 1, mRNA [NM_133455]	0.497858	8.29805
NM_000908	NPR3	NM_000908 || NPR3 || Homo sapiens natriuretic peptide receptor 3 (NPR3), transcript variant 2, mRNA [NM_000908]	0.497001	8.04245
NM_024837	ATP8B4	NM_024837 || ATP8B4 || Homo sapiens ATPase, class I, type 8B, member 4 (ATP8B4), transcript variant 1, mRNA [NM_024837]	0.495341	9.86742
NM_001001924	MTUS1	NM_001001924 || MTUS1 || Homo sapiens microtubule associated tumor suppressor 1 (MTUS1), transcript variant 1, mRNA [NM_001001924]	0.493986	6.34782
NM_021197	WFDC1	NM_021197 || WFDC1 || Homo sapiens WAP four-disulfide core domain 1 (WFDC1), transcript variant 1, mRNA [NM_021197]	0.493422	8.02947
lnc-N4BP2-1:1	lnc-N4BP2-1	lnc-N4BP2-1:1 || lnc-N4BP2-1 || ALU6_HUMAN (P39193) Alu subfamily SP sequence contamination warning entry, partial (8%) [THC2533503]	0.492398	8.91488
TCONS_l2_00024286	XLOC_l2_012605	TCONS_l2_00024286 || XLOC_l2_012605 || BROAD Institute lincRNA (XLOC_l2_012605), lincRNA [TCONS_l2_00024286]	0.491372	9.1701
NM_001202	BMP4	NM_001202 || BMP4 || Homo sapiens bone morphogenetic protein 4 (BMP4), transcript variant 1, mRNA [NM_001202]	0.491309	7.69337
NM_012329	MMD	NM_012329 || MMD || Homo sapiens monocyte to macrophage differentiation-associated (MMD), mRNA [NM_012329]	0.485948	4.49066
NM_000599	IGFBP5	NM_000599 || IGFBP5 || Homo sapiens insulin-like growth factor binding protein 5 (IGFBP5), mRNA [NM_000599]	0.485942	4.83406
AF132204		AF132204 || || Homo sapiens PRO2259 mRNA, complete cds. [AF132204]	0.483341	9.5093
NM_000930	PLAT	NM_000930 || PLAT || Homo sapiens plasminogen activator, tissue (PLAT), transcript variant 1, mRNA [NM_000930]	0.483318	1.95664
NM_030613	ZFP2	NM_030613 || ZFP2 || Homo sapiens ZFP2 zinc finger protein (ZFP2), mRNA [NM_030613]	0.480553	7.72687
NM_144629	RFTN2	NM_144629 || RFTN2 || Homo sapiens raftlin family member 2 (RFTN2), mRNA [NM_144629]	0.478258	5.25571
NM_021992	TMSB15A	NM_021992 || TMSB15A || Homo sapiens thymosin beta 15a (TMSB15A), mRNA [NM_021992]	0.476393	8.52918
NM_000014	A2M	NM_000014 || A2M || Homo sapiens alpha-2-macroglobulin (A2M), mRNA [NM_000014]	0.475239	8.32941
A_33_P3255824		A_33_P3255824 || unmapped	0.469395	4.39246
NM_001114173	CTSC	NM_001114173 || CTSC || Homo sapiens cathepsin C (CTSC), transcript variant 3, mRNA [NM_001114173]	0.462786	8.22069
NM_001463	FRZB	NM_001463 || FRZB || Homo sapiens frizzled-related protein (FRZB), mRNA [NM_001463]	0.461793	6.12828
NR_125424	LOC101927822	NR_125424 || LOC101927822 || Homo sapiens uncharacterized LOC101927822 (LOC101927822), long non-coding RNA [NR_125424]	0.461175	6.5616
NM_003638	ITGA8	NM_003638 || ITGA8 || Homo sapiens integrin, alpha 8 (ITGA8), transcript variant 1, mRNA [NM_003638]	0.459354	7.48309
NM_005618	DLL1	NM_005618 || DLL1 || Homo sapiens delta-like 1 (Drosophila) (DLL1), mRNA [NM_005618]	0.459316	6.34782
NM_024749	VASH2	NM_024749 || VASH2 || Homo sapiens vasohibin 2 (VASH2), transcript variant 1, mRNA [NM_024749]	0.457765	6.78656
NR_026860	LINC00473	NR_026860 || LINC00473 || Homo sapiens long intergenic non-protein coding RNA 473 (LINC00473), transcript variant 1, long non-coding RNA [NR_026860]	0.456682	4.84012
NM_001286123	SLC17A2	NM_001286123 || SLC17A2 || Homo sapiens solute carrier family 17, member 2 (SLC17A2), transcript variant 1, mRNA [NM_001286123]	0.452599	9.67031
NM_031476	CRISPLD2	NM_031476 || CRISPLD2 || Homo sapiens cysteine-rich secretory protein LCCL domain containing 2 (CRISPLD2), mRNA [NM_031476]	0.444345	4.87916
NM_013427	ARHGAP6	NM_013427 || ARHGAP6 || Homo sapiens Rho GTPase activating protein 6 (ARHGAP6), transcript variant 1, mRNA [NM_013427]	0.442104	6.85124
NM_006186	NR4A2	NM_006186 || NR4A2 || Homo sapiens nuclear receptor subfamily 4, group A, member 2 (NR4A2), mRNA [NM_006186]	0.437426	3.68875
NM_004495	NRG1	NM_004495 || NRG1 || Homo sapiens neuregulin 1 (NRG1), transcript variant HRG-gamma, mRNA [NM_004495]	0.435492	6.78656
NM_014722	FAM65B	NM_014722 || FAM65B || Homo sapiens family with sequence similarity 65, member B (FAM65B), transcript variant 1, mRNA [NM_014722]	0.435098	4.77639
lnc-TPCN2-3:1	lnc-TPCN2-3	lnc-TPCN2-3:1 || lnc-TPCN2-3 || om57b03.s1 NCI_CGAP_GC4 Homo sapiens cDNA clone IMAGE:1551245 3' similar to contains PTR5.t1 MER22 repetitive element ;, mRNA sequence [AA936120]	0.434506	2.7952
NM_004185	WNT2B	NM_004185 || WNT2B || Homo sapiens wingless-type MMTV integration site family, member 2B (WNT2B), transcript variant WNT-2B1, mRNA [NM_004185]	0.431531	6.46513
NM_001080406	C12orf71	NM_001080406 || C12orf71 || Homo sapiens chromosome 12 open reading frame 71 (C12orf71), mRNA [NM_001080406]	0.429683	7.72687
NM_014817	TRIL	NM_014817 || TRIL || Homo sapiens TLR4 interactor with leucine-rich repeats (TRIL), mRNA [NM_014817]	0.429001	9.67031
NM_001008394	EID3	NM_001008394 || EID3 || Homo sapiens EP300 interacting inhibitor of differentiation 3 (EID3), mRNA [NM_001008394]	0.424552	7.11249
NM_005733	KIF20A	NM_005733 || KIF20A || Homo sapiens kinesin family member 20A (KIF20A), mRNA [NM_005733]	0.424207	3.16225
ENST00000439058	LOC100506098	ENST00000439058 || LOC100506098 || PREDICTED: Homo sapiens uncharacterized LOC100506098 (LOC100506098), transcript variant X3, ncRNA [XR_108746]	0.424089	7.3702
NM_002923	RGS2	NM_002923 || RGS2 || Homo sapiens regulator of G-protein signaling 2 (RGS2), mRNA [NM_002923]	0.422367	3.2164
NM_002982	CCL2	NM_002982 || CCL2 || Homo sapiens chemokine (C-C motif) ligand 2 (CCL2), mRNA [NM_002982]	0.419357	8.12837
NM_023940	RASL11B	NM_023940 || RASL11B || Homo sapiens RAS-like, family 11, member B (RASL11B), mRNA [NM_023940]	0.419305	6.87753
NM_198391	FLRT3	NM_198391 || FLRT3 || Homo sapiens fibronectin leucine rich transmembrane protein 3 (FLRT3), transcript variant 2, mRNA [NM_198391]	0.416996	6.66369
NM_148170	CTSC	NM_148170 || CTSC || Homo sapiens cathepsin C (CTSC), transcript variant 2, mRNA [NM_148170]	0.408803	7.42
NM_002153	HSD17B2	NM_002153 || HSD17B2 || Homo sapiens hydroxysteroid (17-beta) dehydrogenase 2 (HSD17B2), mRNA [NM_002153]	0.406957	3.02574
NM_002522	NPTX1	NM_002522 || NPTX1 || Homo sapiens neuronal pentraxin I (NPTX1), mRNA [NM_002522]	0.406608	8.36458
NM_000576	IL1B	NM_000576 || IL1B || Homo sapiens interleukin 1, beta (IL1B), mRNA [NM_000576]	0.399439	8.15095
NM_006343	MERTK	NM_006343 || MERTK || Homo sapiens MER proto-oncogene, tyrosine kinase (MERTK), mRNA [NM_006343]	0.397555	5.99551
NM_012338	TSPAN12	NM_012338 || TSPAN12 || Homo sapiens tetraspanin 12 (TSPAN12), mRNA [NM_012338]	0.392696	4.84279
NM_020169	LXN	NM_020169 || LXN || Homo sapiens latexin (LXN), mRNA [NM_020169]	0.387388	9.41364
NM_007038	ADAMTS5	NM_007038 || ADAMTS5 || Homo sapiens ADAM metallopeptidase with thrombospondin type 1 motif, 5 (ADAMTS5), mRNA [NM_007038]	0.372023	5.3363
NM_006378	SEMA4D	NM_006378 || SEMA4D || Homo sapiens sema domain, immunoglobulin domain (Ig), transmembrane domain (TM) and short cytoplasmic domain, (semaphorin) 4D (SEMA4D), transcript variant 1, mRNA [NM_006378]	0.371111	7.20939
NM_005330	HBE1	NM_005330 || HBE1 || Homo sapiens hemoglobin, epsilon 1 (HBE1), mRNA [NM_005330]	0.371045	8.04245
NM_020997	LEFTY1	NM_020997 || LEFTY1 || Homo sapiens left-right determination factor 1 (LEFTY1), mRNA [NM_020997]	0.369655	5.31434
NM_001200	BMP2	NM_001200 || BMP2 || Homo sapiens bone morphogenetic protein 2 (BMP2), mRNA [NM_001200]	0.368882	8.22069
NM_000238	KCNH2	NM_000238 || KCNH2 || Homo sapiens potassium voltage-gated channel, subfamily H (eag-related), member 2 (KCNH2), transcript variant 1, mRNA [NM_000238]	0.364476	8.70384
NM_001145033	C11orf96	NM_001145033 || C11orf96 || Homo sapiens chromosome 11 open reading frame 96 (C11orf96), mRNA [NM_001145033]	0.363266	6.34782
NM_001009909	LUZP2	NM_001009909 || LUZP2 || Homo sapiens leucine zipper protein 2 (LUZP2), transcript variant 1, mRNA [NM_001009909]	0.359597	8.36062
NM_020225	STOX2	NM_020225 || STOX2 || Homo sapiens storkhead box 2 (STOX2), mRNA [NM_020225]	0.359534	4.47233
NM_182920	ADAMTS9	NM_182920 || ADAMTS9 || Homo sapiens ADAM metallopeptidase with thrombospondin type 1 motif, 9 (ADAMTS9), mRNA [NM_182920]	0.357497	4.77458
NM_024420	PLA2G4A	NM_024420 || PLA2G4A || Homo sapiens phospholipase A2, group IVA (cytosolic, calcium-dependent) (PLA2G4A), mRNA [NM_024420]	0.353784	7.13727
NM_030632	ASXL3	NM_030632 || ASXL3 || Homo sapiens additional sex combs like transcriptional regulator 3 (ASXL3), mRNA [NM_030632]	0.341424	5.18966
NM_001142287	SEMA4D	NM_001142287 || SEMA4D || Homo sapiens sema domain, immunoglobulin domain (Ig), transmembrane domain (TM) and short cytoplasmic domain, (semaphorin) 4D (SEMA4D), transcript variant 2, mRNA [NM_001142287]	0.332434	9.5093
NM_005114	HS3ST1	NM_005114 || HS3ST1 || Homo sapiens heparan sulfate (glucosamine) 3-O-sulfotransferase 1 (HS3ST1), mRNA [NM_005114]	0.323591	2.82402
NM_002612	PDK4	NM_002612 || PDK4 || Homo sapiens pyruvate dehydrogenase kinase, isozyme 4 (PDK4), mRNA [NM_002612]	0.315351	3.1679
ENST00000607314		ENST00000607314 || || Homo sapiens MSTP131 (MST131) mRNA, complete cds. [AF176921]	0.308855	5.24872
NM_001657	AREG	NM_001657 || AREG || Homo sapiens amphiregulin (AREG), mRNA [NM_001657]	0.305316	2.7952
NM_130782	RGS18	NM_130782 || RGS18 || Homo sapiens regulator of G-protein signaling 18 (RGS18), mRNA [NM_130782]	0.29705	2.05962
NM_001034852	SMOC1	NM_001034852 || SMOC1 || Homo sapiens SPARC related modular calcium binding 1 (SMOC1), transcript variant 1, mRNA [NM_001034852]	0.292379	3.03945
NR_001589	HBBP1	NR_001589 || HBBP1 || Homo sapiens hemoglobin, beta pseudogene 1 (HBBP1), non-coding RNA [NR_001589]	0.285955	7.94
NM_000963	PTGS2	NM_000963 || PTGS2 || Homo sapiens prostaglandin-endoperoxide synthase 2 (prostaglandin G/H synthase and cyclooxygenase) (PTGS2), mRNA [NM_000963]	0.285621	6.79516
NM_003991	EDNRB	NM_003991 || EDNRB || Homo sapiens endothelin receptor type B (EDNRB), transcript variant 2, mRNA [NM_003991]	0.275431	8.15095
NR_075093	SOX2-OT	NR_075093 || SOX2-OT || Homo sapiens SOX2 overlapping transcript (SOX2-OT), transcript variant 3, long non-coding RNA [NR_075093]	0.273289	9.5093
NM_020741	KIAA1257	NM_020741 || KIAA1257 || Homo sapiens KIAA1257 (KIAA1257), mRNA [NM_020741]	0.267878	5.3363
NM_006108	SPON1	NM_006108 || SPON1 || Homo sapiens spondin 1, extracellular matrix protein (SPON1), mRNA [NM_006108]	0.260344	9.80229
NM_133477	SYNPO2	NM_133477 || SYNPO2 || Homo sapiens synaptopodin 2 (SYNPO2), transcript variant 1, mRNA [NM_133477]	0.191826	8.36062

## Sheet: Gr-5A-CD, non-toxic
NCBI RefSeq	Gene Symbol	NBCI RefSeq || Gene Symbol || Gene Description (total # of significant genes: 391; 222 up, 169 down)	Normalized Fold (Unlogged)	q-value (%)
NM_001165252	KRTAP2-3	NM_001165252 || KRTAP2-3 || Homo sapiens keratin associated protein 2-3 (KRTAP2-3), mRNA [NM_001165252]	4.88367	3.91045
NM_014398	LAMP3	NM_014398 || LAMP3 || Homo sapiens lysosomal-associated membrane protein 3 (LAMP3), mRNA [NM_014398]	4.05492	3.88211
NM_032413	C15orf48	NM_032413 || C15orf48 || Homo sapiens chromosome 15 open reading frame 48 (C15orf48), transcript variant 2, mRNA [NM_032413]	3.6384	5.4425
NM_024875	SYNPO2L	NM_024875 || SYNPO2L || Homo sapiens synaptopodin 2-like (SYNPO2L), transcript variant 2, mRNA [NM_024875]	3.57157	4.25184
lnc-HK2-1:1	lnc-HK2-1	lnc-HK2-1:1 || lnc-HK2-1 || LNCipedia lincRNA (lnc-HK2-1), lincRNA [lnc-HK2-1:1]	3.14603	6.46758
ENST00000453951	LINC01293	ENST00000453951 || LINC01293 || long intergenic non-protein coding RNA 1293 [Source:HGNC Symbol;Acc:HGNC:50362] [ENST00000453951]	3.10681	5.11522
NM_018423	STYK1	NM_018423 || STYK1 || Homo sapiens serine/threonine/tyrosine kinase 1 (STYK1), mRNA [NM_018423]	2.88336	5.0406
lnc-ARSJ-1:2	lnc-ARSJ-1	lnc-ARSJ-1:2 || lnc-ARSJ-1 || LNCipedia lincRNA (lnc-ARSJ-1), lincRNA [lnc-ARSJ-1:2]	2.70654	3.90475
NM_000916	OXTR	NM_000916 || OXTR || Homo sapiens oxytocin receptor (OXTR), mRNA [NM_000916]	2.67043	3.85418
lnc-ARSJ-1:6	lnc-ARSJ-1	lnc-ARSJ-1:6 || lnc-ARSJ-1 || LNCipedia lincRNA (lnc-ARSJ-1), lincRNA [lnc-ARSJ-1:6]	2.49369	5.24393
NM_021013	KRT34	NM_021013 || KRT34 || Homo sapiens keratin 34, type I (KRT34), mRNA [NM_021013]	2.40078	5.61912
NM_000758	CSF2	NM_000758 || CSF2 || Homo sapiens colony stimulating factor 2 (granulocyte-macrophage) (CSF2), mRNA [NM_000758]	2.31277	5.88923
NM_016352	CPA4	NM_016352 || CPA4 || Homo sapiens carboxypeptidase A4 (CPA4), transcript variant 1, mRNA [NM_016352]	2.30007	4.89154
NM_001114133	SYNPO2L	NM_001114133 || SYNPO2L || Homo sapiens synaptopodin 2-like (SYNPO2L), transcript variant 1, mRNA [NM_001114133]	2.28235	9.64507
lnc-CDKN1C-2:1	lnc-CDKN1C-2	lnc-CDKN1C-2:1 || lnc-CDKN1C-2 || Homo sapiens partial mRNA for KCNQ1OT2 protein. [AJ251642]	2.27229	5.0406
NM_001159	AOX1	NM_001159 || AOX1 || Homo sapiens aldehyde oxidase 1 (AOX1), mRNA [NM_001159]	2.26377	4.98235
lnc-SHPRH-2:8	lnc-SHPRH-2	lnc-SHPRH-2:8 || lnc-SHPRH-2 || LNCipedia lincRNA (lnc-SHPRH-2), lincRNA [lnc-SHPRH-2:8]	2.23678	6.77097
ENST00000539116		ENST00000539116 || || Unknown	2.22514	6.77097
NM_001103161	SH2D5	NM_001103161 || SH2D5 || Homo sapiens SH2 domain containing 5 (SH2D5), transcript variant 1, mRNA [NM_001103161]	2.21836	4.61277
NM_021614	KCNN2	NM_021614 || KCNN2 || Homo sapiens potassium channel, calcium activated intermediate/small conductance subfamily N alpha, member 2 (KCNN2), transcript variant 1, mRNA [NM_021614]	2.21294	9.07271
NM_203394	E2F7	NM_203394 || E2F7 || Homo sapiens E2F transcription factor 7 (E2F7), mRNA [NM_203394]	2.20711	5.0406	182 overlap, 92 up, 90 down (between Gr-5A-V & Gr-5A-CD):
NR_110429	LINC01540	NR_110429 || LINC01540 || Homo sapiens long intergenic non-protein coding RNA 1540 (LINC01540), transcript variant 1, long non-coding RNA [NR_110429]	2.19683	5.79185	LAMP3
NM_004911	PDIA4	NM_004911 || PDIA4 || Homo sapiens protein disulfide isomerase family A, member 4 (PDIA4), mRNA [NM_004911]	2.15473	4.59198	SYNPO2L
NM_021827	CCDC81	NM_021827 || CCDC81 || Homo sapiens coiled-coil domain containing 81 (CCDC81), transcript variant 2, mRNA [NM_021827]	2.15344	5.4425	KRTAP2-3
NM_018712	ELMOD1	NM_018712 || ELMOD1 || Homo sapiens ELMO/CED-12 domain containing 1 (ELMOD1), transcript variant 1, mRNA [NM_018712]	2.13737	5.88923	LINC01293
NM_001205288	LIMS3L	NM_001205288 || LIMS3L || Homo sapiens LIM and senescent cell antigen-like domains 3-like (LIMS3L), transcript variant 1, mRNA [NM_001205288]	2.12755	6.98267	PDIA4
ENST00000418546		ENST00000418546 || || microRNA 29b-1 [Source:HGNC Symbol;Acc:HGNC:31619] [ENST00000418546]	2.1237	4.92061	LIMS3L
AF130104	MAGT1	AF130104 || MAGT1 || Homo sapiens clone FLB3024 PRO0756 mRNA, complete cds. [AF130104]	2.12288	4.52241	HSP90B1
ENST00000550766	CRADD	ENST00000550766 || CRADD || CASP2 and RIPK1 domain containing adaptor with death domain [Source:HGNC Symbol;Acc:HGNC:2340] [ENST00000550766]	2.0968	8.10083	STYK1
ENST00000451149		ENST00000451149 || || Unknown	2.09039	4.67479	CCDC81
NM_001012761	RGMB	NM_001012761 || RGMB || Homo sapiens repulsive guidance molecule family member b (RGMB), mRNA [NM_001012761]	2.0864	4.71297	OXTR
NM_001794	CDH4	NM_001794 || CDH4 || Homo sapiens cadherin 4, type 1, R-cadherin (retinal) (CDH4), transcript variant 1, mRNA [NM_001794]	2.05092	7.09035	KRT34
NM_001004441	ANKRD34B	NM_001004441 || ANKRD34B || Homo sapiens ankyrin repeat domain 34B (ANKRD34B), mRNA [NM_001004441]	2.04315	4.01181	AOX1
NM_001277313	FMN1	NM_001277313 || FMN1 || Homo sapiens formin 1 (FMN1), transcript variant 1, mRNA [NM_001277313]	2.02269	6.77097	LINC01583
NM_001282431	ARL4C	NM_001282431 || ARL4C || Homo sapiens ADP-ribosylation factor-like 4C (ARL4C), transcript variant 1, mRNA [NM_001282431]	2.01932	4.12948	LINC01291
NM_033143	FGF5	NM_033143 || FGF5 || Homo sapiens fibroblast growth factor 5 (FGF5), transcript variant 2, mRNA [NM_033143]	2.01257	4.71297	CDH4
NM_003299	HSP90B1	NM_003299 || HSP90B1 || Homo sapiens heat shock protein 90kDa beta (Grp94), member 1 (HSP90B1), mRNA [NM_003299]	2.01115	4.52241	CRELD2
ENST00000554254		ENST00000554254 || || HIF1A antisense RNA 2 [Source:HGNC Symbol;Acc:HGNC:43015] [ENST00000554254]	2.00587	5.10829	BEX2
NM_182527	CABP7	NM_182527 || CABP7 || Homo sapiens calcium binding protein 7 (CABP7), mRNA [NM_182527]	1.99733	6.77097	XDH
NR_104659	LOC102467080	NR_104659 || LOC102467080 || Homo sapiens uncharacterized LOC102467080 (LOC102467080), transcript variant 2, long non-coding RNA [NR_104659]	1.99508	3.88804	LINC01540
NM_001423	EMP1	NM_001423 || EMP1 || Homo sapiens epithelial membrane protein 1 (EMP1), mRNA [NM_001423]	1.98221	5.68704	SH2D5
NM_014903	NAV3	NM_014903 || NAV3 || Homo sapiens neuron navigator 3 (NAV3), transcript variant 2, mRNA [NM_014903]	1.97677	5.11522	ELMOD1
NR_120367	LINC01583	NR_120367 || LINC01583 || Homo sapiens long intergenic non-protein coding RNA 1583 (LINC01583), long non-coding RNA [NR_120367]	1.9748	7.26238	CABP7
NM_000379	XDH	NM_000379 || XDH || Homo sapiens xanthine dehydrogenase (XDH), mRNA [NM_000379]	1.97357	8.29957	E2F7
NR_110428	LINC01540	NR_110428 || LINC01540 || Homo sapiens long intergenic non-protein coding RNA 1540 (LINC01540), transcript variant 2, long non-coding RNA [NR_110428]	1.96164	4.69026	EMP1
ENST00000586949	LOC100130938	ENST00000586949 || LOC100130938 || PREDICTED: Homo sapiens uncharacterized LOC100130938 (LOC100130938), transcript variant X1, ncRNA [XR_110148]	1.96006	5.6679	STEAP1B
NM_000960	PTGIR	NM_000960 || PTGIR || Homo sapiens prostaglandin I2 (prostacyclin) receptor (IP) (PTGIR), mRNA [NM_000960]	1.95344	3.85072	NAV3
NR_125792	LINC01291	NR_125792 || LINC01291 || Homo sapiens long intergenic non-protein coding RNA 1291 (LINC01291), long non-coding RNA [NR_125792]	1.95203	8.29957	ARHGAP22
A_33_P3245126		A_33_P3245126 || unmapped	1.94087	4.61277	NR1D1
NM_173672	PPIL6	NM_173672 || PPIL6 || Homo sapiens peptidylprolyl isomerase (cyclophilin)-like 6 (PPIL6), transcript variant 1, mRNA [NM_173672]	1.92158	5.97223	KLF2
NM_001300919	HMGA2	NM_001300919 || HMGA2 || Homo sapiens high mobility group AT-hook 2 (HMGA2), transcript variant 4, mRNA [NM_001300919]	1.89958	5.10829	ARL4C
NM_080927	DCBLD2	NM_080927 || DCBLD2 || Homo sapiens discoidin, CUB and LCCL domain containing 2 (DCBLD2), mRNA [NM_080927]	1.89713	5.0406	DCBLD2
NM_001135032	EVA1A	NM_001135032 || EVA1A || Homo sapiens eva-1 homolog A (C. elegans) (EVA1A), transcript variant 1, mRNA [NM_001135032]	1.89456	6.60113	CSF2
NM_021226	ARHGAP22	NM_021226 || ARHGAP22 || Homo sapiens Rho GTPase activating protein 22 (ARHGAP22), transcript variant 3, mRNA [NM_021226]	1.88578	4.66472	SEC11C
NM_145244	DDIT4L	NM_145244 || DDIT4L || Homo sapiens DNA-damage-inducible transcript 4-like (DDIT4L), mRNA [NM_145244]	1.86964	3.86965	RGMB
ENST00000415545		ENST00000415545 || || heat shock protein 90kDa beta (Grp94), member 3, pseudogene [Source:HGNC Symbol;Acc:HGNC:12100] [ENST00000415545]	1.86442	4.52241	LPXN
lnc-GATA4-1:1	lnc-GATA4-1	lnc-GATA4-1:1 || lnc-GATA4-1 || LNCipedia lincRNA (lnc-GATA4-1), lincRNA [lnc-GATA4-1:1]	1.8625	6.51391	RGS4
NM_001945	HBEGF	NM_001945 || HBEGF || Homo sapiens heparin-binding EGF-like growth factor (HBEGF), mRNA [NM_001945]	1.86046	5.24393	FMN1
NM_053054	CATSPER1	NM_053054 || CATSPER1 || Homo sapiens cation channel, sperm associated 1 (CATSPER1), mRNA [NM_053054]	1.85942	8.93266	UPP1
NM_003612	SEMA7A	NM_003612 || SEMA7A || Homo sapiens semaphorin 7A, GPI membrane anchor (John Milton Hagen blood group) (SEMA7A), transcript variant 1, mRNA [NM_003612]	1.85753	3.86176	SLC20A1
NM_001164460	STEAP1B	NM_001164460 || STEAP1B || Homo sapiens STEAP family member 1B (STEAP1B), transcript variant 1, mRNA [NM_001164460]	1.85419	5.88923	LOX
NM_016270	KLF2	NM_016270 || KLF2 || Homo sapiens Kruppel-like factor 2 (KLF2), mRNA [NM_016270]	1.83823	4.92061	LOC100130938
A_33_P3317460		A_33_P3317460 || unmapped	1.83371	6.35923	PTGIR
TCONS_l2_00021296	XLOC_l2_011265	TCONS_l2_00021296 || XLOC_l2_011265 || BROAD Institute lincRNA (XLOC_l2_011265), lincRNA [TCONS_l2_00021296]	1.82179	4.08955	EVA1A
NM_024324	CRELD2	NM_024324 || CRELD2 || Homo sapiens cysteine-rich with EGF-like domains 2 (CRELD2), transcript variant 2, mRNA [NM_024324]	1.81642	4.90597	IL7R
NM_021724	NR1D1	NM_021724 || NR1D1 || Homo sapiens nuclear receptor subfamily 1, group D, member 1 (NR1D1), mRNA [NM_021724]	1.81464	5.0406	SERPINE1
NM_000955	PTGER1	NM_000955 || PTGER1 || Homo sapiens prostaglandin E receptor 1 (subtype EP1), 42kDa (PTGER1), mRNA [NM_000955]	1.81421	5.97223	NRK
lnc-NAP1L3-1:1	lnc-NAP1L3-1	lnc-NAP1L3-1:1 || lnc-NAP1L3-1 || Homo sapiens cDNA FLJ43298 fis, clone NCRRP1000129. [AK125288]	1.80993	5.18868	HMGA2
NM_032181	EVA1A	NM_032181 || EVA1A || Homo sapiens eva-1 homolog A (C. elegans) (EVA1A), transcript variant 2, mRNA [NM_032181]	1.80368	3.92477	DKK1
NM_030824	ZNF442	NM_030824 || ZNF442 || Homo sapiens zinc finger protein 442 (ZNF442), mRNA [NM_030824]	1.78891	9.64507	ANXA1
lnc-CHST1-4:2	lnc-CHST1-4	lnc-CHST1-4:2 || lnc-CHST1-4 || LNCipedia lincRNA (lnc-CHST1-4), lincRNA [lnc-CHST1-4:2]	1.78302	4.54762	AHNAK2
NM_024009	GJB3	NM_024009 || GJB3 || Homo sapiens gap junction protein, beta 3, 31kDa (GJB3), transcript variant 1, mRNA [NM_024009]	1.78286	4.1594	CRADD
NM_002317	LOX	NM_002317 || LOX || Homo sapiens lysyl oxidase (LOX), transcript variant 1, mRNA [NM_002317]	1.78071	6.51391	AMIGO2
NM_003483	HMGA2	NM_003483 || HMGA2 || Homo sapiens high mobility group AT-hook 2 (HMGA2), transcript variant 1, mRNA [NM_003483]	1.77984	7.9889	SLC37A2
NM_005450	NOG	NM_005450 || NOG || Homo sapiens noggin (NOG), mRNA [NM_005450]	1.77669	0	NOG
NM_001290065	ROBO2	NM_001290065 || ROBO2 || Homo sapiens roundabout, axon guidance receptor, homolog 2 (Drosophila) (ROBO2), transcript variant 5, mRNA [NM_001290065]	1.76647	6.35923	ARHGAP18
NM_001167915	VEPH1	NM_001167915 || VEPH1 || Homo sapiens ventricular zone expressed PH domain-containing 1 (VEPH1), transcript variant 4, mRNA [NM_001167915]	1.7622	4.67479	CD163L1
NM_052867	NALCN	NM_052867 || NALCN || Homo sapiens sodium leak channel, non selective (NALCN), mRNA [NM_052867]	1.75984	8.82064	HBEGF
A_33_P3277228		A_33_P3277228 || unmapped	1.75926	5.4425	LY96
NM_001164436	TMEM212	NM_001164436 || TMEM212 || Homo sapiens transmembrane protein 212 (TMEM212), mRNA [NM_001164436]	1.75708	9.07271	G0S2
NM_001286679	LARP6	NM_001286679 || LARP6 || Homo sapiens La ribonucleoprotein domain family, member 6 (LARP6), transcript variant 3, mRNA [NM_001286679]	1.75346	3.98149	VEGFC
NM_012242	DKK1	NM_012242 || DKK1 || Homo sapiens dickkopf WNT signaling pathway inhibitor 1 (DKK1), mRNA [NM_012242]	1.74965	4.90597	ROBO2
NM_033280	SEC11C	NM_033280 || SEC11C || Homo sapiens SEC11 homolog C (S. cerevisiae) (SEC11C), mRNA [NM_033280]	1.74417	4.75409	IRS2
NM_001287426	UPP1	NM_001287426 || UPP1 || Homo sapiens uridine phosphorylase 1 (UPP1), transcript variant 3, mRNA [NM_001287426]	1.74133	6.2676	FGF5
NM_005415	SLC20A1	NM_005415 || SLC20A1 || Homo sapiens solute carrier family 20 (phosphate transporter), member 1 (SLC20A1), mRNA [NM_005415]	1.74061	4.39998	JRK
AI830629		AI830629 || || wj10a11.x1 NCI_CGAP_Kid12 Homo sapiens cDNA clone IMAGE:2402396 3', mRNA sequence [AI830629]	1.7404	5.84628	VEPH1
NM_181847	AMIGO2	NM_181847 || AMIGO2 || Homo sapiens adhesion molecule with Ig-like domain 2 (AMIGO2), transcript variant 2, mRNA [NM_181847]	1.73673	0	NALCN
lnc-TAOK3-1:5	lnc-TAOK3-1	lnc-TAOK3-1:5 || lnc-TAOK3-1 || LNCipedia lincRNA (lnc-TAOK3-1), lincRNA [lnc-TAOK3-1:5]	1.73618	6.60113	DDIT4L
NM_000602	SERPINE1	NM_000602 || SERPINE1 || Homo sapiens serpin peptidase inhibitor, clade E (nexin, plasminogen activator inhibitor type 1), member 1 (SERPINE1), mRNA [NM_000602]	1.73248	4.81875	AFF2
NM_001165	BIRC3	NM_001165 || BIRC3 || Homo sapiens baculoviral IAP repeat containing 3 (BIRC3), transcript variant 1, mRNA [NM_001165]	1.7324	8.93266	B4GALNT1
NM_000210	ITGA6	NM_000210 || ITGA6 || Homo sapiens integrin, alpha 6 (ITGA6), transcript variant 2, mRNA [NM_000210]	1.72859	7.59525	MET
NM_006072	CCL26	NM_006072 || CCL26 || Homo sapiens chemokine (C-C motif) ligand 26 (CCL26), mRNA [NM_006072]	1.72355	9.37487	MURC
ENST00000449466	LOC101929484	ENST00000449466 || LOC101929484 || PREDICTED: Homo sapiens uncharacterized LOC101929484 (LOC101929484), ncRNA [XR_245642]	1.72142	4.61277	FAM129A
ENST00000453790		ENST00000453790 || || RST5306 Athersys RAGE Library Homo sapiens cDNA, mRNA sequence [BG186343]	1.72058	5.4425	CLDN1
lnc-APOM-3:1	lnc-APOM-3	lnc-APOM-3:1 || lnc-APOM-3 || LNCipedia lincRNA (lnc-APOM-3), lincRNA [lnc-APOM-3:1]	1.71921	5.97223	MECP2
NR_040018	C1QTNF1-AS1	NR_040018 || C1QTNF1-AS1 || Homo sapiens C1QTNF1 antisense RNA 1 (C1QTNF1-AS1), transcript variant 1, long non-coding RNA [NR_040018]	1.7141	6.98267	PTX3
NM_000700	ANXA1	NM_000700 || ANXA1 || Homo sapiens annexin A1 (ANXA1), mRNA [NM_000700]	1.71355	7.09035	LOC102723817
NR_036538	LOC646903	NR_036538 || LOC646903 || Homo sapiens uncharacterized LOC646903 (LOC646903), long non-coding RNA [NR_036538]	1.71255	9.64507	SLC9A7
TCONS_l2_00017992	XLOC_l2_009508	TCONS_l2_00017992 || XLOC_l2_009508 || BROAD Institute lincRNA (XLOC_l2_009508), lincRNA [TCONS_l2_00017992]	1.70708	3.77517	TBC1D2
THC2498688		THC2498688 || || Unknown	1.70524	4.75285	COBLL1
lnc-AAAS-1:1	lnc-AAAS-1	lnc-AAAS-1:1 || lnc-AAAS-1 || ALU6_HUMAN (P39193) Alu subfamily SP sequence contamination warning entry, partial (24%) [THC2661571]	1.70213	9.64507	IGFBP3
ENST00000423924	LOC100996557	ENST00000423924 || LOC100996557 || PREDICTED: Homo sapiens uncharacterized LOC100996557 (LOC100996557), ncRNA [XR_158849]	1.70093	8.82064	LOC100996557
TCONS_l2_00027783	XLOC_l2_014217	TCONS_l2_00027783 || XLOC_l2_014217 || BROAD Institute lincRNA (XLOC_l2_014217), lincRNA [TCONS_l2_00027783]	1.69537	7.26238	ATP8B1
NM_002185	IL7R	NM_002185 || IL7R || Homo sapiens interleukin 7 receptor (IL7R), transcript variant 1, mRNA [NM_002185]	1.69436	6.2676	LDLR
NM_016341	PLCE1	NM_016341 || PLCE1 || Homo sapiens phospholipase C, epsilon 1 (PLCE1), transcript variant 1, mRNA [NM_016341]	1.69414	4.31436	ADTRP
NM_021101	CLDN1	NM_021101 || CLDN1 || Homo sapiens claudin 1 (CLDN1), mRNA [NM_021101]	1.68826	4.44255	LRRN4CL
NM_023003	TM6SF1	NM_023003 || TM6SF1 || Homo sapiens transmembrane 6 superfamily member 1 (TM6SF1), transcript variant 1, mRNA [NM_023003]	1.68237	4.81875	SNORA30
NR_125952	LOC101928324	NR_125952 || LOC101928324 || Homo sapiens uncharacterized LOC101928324 (LOC101928324), transcript variant 1, long non-coding RNA [NR_125952]	1.68051	9.89917	PLCE1
lnc-GDF5-1:2	lnc-GDF5-1	lnc-GDF5-1:2 || lnc-GDF5-1 || LNCipedia lincRNA (lnc-GDF5-1), lincRNA [lnc-GDF5-1:2]	1.6801	4.45824	MAGT1
lnc-MYCT1-2:1	lnc-MYCT1-2	lnc-MYCT1-2:1 || lnc-MYCT1-2 || RST12958 Athersys RAGE Library Homo sapiens cDNA, mRNA sequence [BG193822]	1.66822	5.07427	MARVELD2
NM_147161	ACOT11	NM_147161 || ACOT11 || Homo sapiens acyl-CoA thioesterase 11 (ACOT11), transcript variant 2, mRNA [NM_147161]	1.66821	5.11522	ACOT11
ENST00000566485		ENST00000566485 || || Unknown	1.66203	4.99129	NRP1
NM_001168399	BEX2	NM_001168399 || BEX2 || Homo sapiens brain expressed X-linked 2 (BEX2), transcript variant 1, mRNA [NM_001168399]	1.65431	4.52323	CLGN
NM_033151	ABCC11	NM_033151 || ABCC11 || Homo sapiens ATP-binding cassette, sub-family C (CFTR/MRP), member 11 (ABCC11), transcript variant 2, mRNA [NM_033151]	1.65393	6.98267	GPC4
NM_177478	FTMT	NM_177478 || FTMT || Homo sapiens ferritin mitochondrial (FTMT), mRNA [NM_177478]	1.65362	4.75285	PTGS1
lnc-RAB30-1:1	lnc-RAB30-1	lnc-RAB30-1:1 || lnc-RAB30-1 || LNCipedia lincRNA (lnc-RAB30-1), lincRNA [lnc-RAB30-1:1]	1.65083	5.11522	LINC00473
NM_015714	G0S2	NM_015714 || G0S2 || Homo sapiens G0/G1 switch 2 (G0S2), mRNA [NM_015714]	1.6507	6.60113	STOM
ENST00000430494		ENST00000430494 || || PREDICTED: Homo sapiens uncharacterized LOC101059946 (LOC101059946), misc_RNA [XR_171346]	1.65061	6.60113	TNFRSF14
NM_032744	ADTRP	NM_032744 || ADTRP || Homo sapiens androgen-dependent TFPI-regulating protein (ADTRP), transcript variant 2, mRNA [NM_032744]	1.64877	9.64507	GRK5
NR_038344	MAGI2-AS3	NR_038344 || MAGI2-AS3 || Homo sapiens MAGI2 antisense RNA 3 (MAGI2-AS3), transcript variant 2, long non-coding RNA [NR_038344]	1.64232	9.89917	CTSL3P
lnc-C20orf96-3:1	lnc-C20orf96-3	lnc-C20orf96-3:1 || lnc-C20orf96-3 || LNCipedia lincRNA (lnc-C20orf96-3), lincRNA [lnc-C20orf96-3:1]	1.64188	8.10083	RHOU
NM_138420	AHNAK2	NM_138420 || AHNAK2 || Homo sapiens AHNAK nucleoprotein 2 (AHNAK2), mRNA [NM_138420]	1.64111	4.92061	RFTN1
NM_052966	FAM129A	NM_052966 || FAM129A || Homo sapiens family with sequence similarity 129, member A (FAM129A), mRNA [NM_052966]	1.63988	3.86965	TNFRSF21
lnc-MSRB3-2:2	lnc-MSRB3-2	lnc-MSRB3-2:2 || lnc-MSRB3-2 || LNCipedia lincRNA (lnc-MSRB3-2), lincRNA [lnc-MSRB3-2:2]	1.6389	7.26238	PMEPA1
NM_001478	B4GALNT1	NM_001478 || B4GALNT1 || Homo sapiens beta-1,4-N-acetyl-galactosaminyl transferase 1 (B4GALNT1), transcript variant 1, mRNA [NM_001478]	1.63677	8.10083	DNM3OS
NM_152495	CNIH3	NM_152495 || CNIH3 || Homo sapiens cornichon family AMPA receptor auxiliary protein 3 (CNIH3), mRNA [NM_152495]	1.63294	8.59711	CSGALNACT1
NM_001159491	BRI3	NM_001159491 || BRI3 || Homo sapiens brain protein I3 (BRI3), transcript variant 2, mRNA [NM_001159491]	1.6328	3.91045	SIPA1L2
NM_001257291	SLC9A7	NM_001257291 || SLC9A7 || Homo sapiens solute carrier family 9, subfamily A (NHE7, cation proton antiporter 7), member 7 (SLC9A7), transcript variant 1, mRNA [NM_001257291]	1.6324	4.66472	KLF9
NM_001280544	DPF3	NM_001280544 || DPF3 || Homo sapiens D4, zinc and double PHD fingers, family 3 (DPF3), transcript variant 4, mRNA [NM_001280544]	1.63081	4.67479	CYTL1
ENST00000562471		ENST00000562471 || || Homo sapiens cDNA FLJ41792 fis, clone NESOP2002352. [AK123786]	1.6302	7.09035	SPRY1
ENST00000564381		ENST00000564381 || || Unknown	1.62874	7.09035	CTSC
ENST00000481340	ARSD	ENST00000481340 || ARSD || arylsulfatase D [Source:HGNC Symbol;Acc:HGNC:717] [ENST00000481340]	1.6284	3.79366	GAS1
NM_000024	ADRB2	NM_000024 || ADRB2 || Homo sapiens adrenoceptor beta 2, surface (ADRB2), mRNA [NM_000024]	1.62772	5.9606	NR4A3
NR_039978	SEC24B-AS1	NR_039978 || SEC24B-AS1 || Homo sapiens SEC24B antisense RNA 1 (SEC24B-AS1), long non-coding RNA [NR_039978]	1.62571	8.29957	SGCD
NM_198277	SLC37A2	NM_198277 || SLC37A2 || Homo sapiens solute carrier family 37 (glucose-6-phosphate transporter), member 2 (SLC37A2), transcript variant 1, mRNA [NM_198277]	1.62212	6.60113	PDZRN3
NM_015364	LY96	NM_015364 || LY96 || Homo sapiens lymphocyte antigen 96 (LY96), transcript variant 1, mRNA [NM_015364]	1.62063	4.67479	PDGFRA
lnc-C3orf52-1:1	lnc-C3orf52-1	lnc-C3orf52-1:1 || lnc-C3orf52-1 || Homo sapiens cDNA FLJ35137 fis, clone PLACE6009419. [AK092456]	1.62004	4.99129	GEM
ENST00000406451	HDAC9	ENST00000406451 || HDAC9 || histone deacetylase 9 [Source:HGNC Symbol;Acc:HGNC:14065] [ENST00000406451]	1.61817	7.59525	PGM2L1
NM_003749	IRS2	NM_003749 || IRS2 || Homo sapiens insulin receptor substrate 2 (IRS2), mRNA [NM_003749]	1.61423	5.14355	LOC101929767
NM_005613	RGS4	NM_005613 || RGS4 || Homo sapiens regulator of G-protein signaling 4 (RGS4), transcript variant 2, mRNA [NM_005613]	1.61283	4.71297	OSBPL10
NM_052853	ADCK2	NM_052853 || ADCK2 || Homo sapiens aarF domain containing kinase 2 (ADCK2), mRNA [NM_052853]	1.61149	7.59525	ARHGAP28
NP366215		NP366215 || || GB	1.6111	7.26238	SMPDL3A
NM_002852	PTX3	NM_002852 || PTX3 || Homo sapiens pentraxin 3, long (PTX3), mRNA [NM_002852]	1.61109	5.07427	IL4R
NM_004811	LPXN	NM_004811 || LPXN || Homo sapiens leupaxin (LPXN), transcript variant 2, mRNA [NM_004811]	1.61046	6.2676	TGM2
NM_012449	STEAP1	NM_012449 || STEAP1 || Homo sapiens six transmembrane epithelial antigen of the prostate 1 (STEAP1), mRNA [NM_012449]	1.60873	9.64507	SNCAIP
NM_033515	ARHGAP18	NM_033515 || ARHGAP18 || Homo sapiens Rho GTPase activating protein 18 (ARHGAP18), mRNA [NM_033515]	1.6002	5.9606	PDE7B
NM_198566	C5orf34	NM_198566 || C5orf34 || Homo sapiens chromosome 5 open reading frame 34 (C5orf34), mRNA [NM_198566]	1.59603	8.82064	NPR3
NM_001713	BHMT	NM_001713 || BHMT || Homo sapiens betaine--homocysteine S-methyltransferase (BHMT), mRNA [NM_001713]	1.59577	6.11979	PDE4B
lnc-TBC1D19-3:1	lnc-TBC1D19-3	lnc-TBC1D19-3:1 || lnc-TBC1D19-3 || LNCipedia lincRNA (lnc-TBC1D19-3), lincRNA [lnc-TBC1D19-3:1]	1.59104	5.0406	HTR1D
lnc-DIO3.1-1:1	lnc-DIO3.1-1	lnc-DIO3.1-1:1 || lnc-DIO3.1-1 || LNCipedia lincRNA (lnc-DIO3.1-1), lincRNA [lnc-DIO3.1-1:1]	1.58565	8.10083	SIK1
NM_005429	VEGFC	NM_005429 || VEGFC || Homo sapiens vascular endothelial growth factor C (VEGFC), mRNA [NM_005429]	1.58353	5.9606	JUP
lnc-RP11-582J16.5.1-3:1	lnc-RP11-582J16.5.1-3	lnc-RP11-582J16.5.1-3:1 || lnc-RP11-582J16.5.1-3 || LNCipedia lincRNA (lnc-RP11-582J16.5.1-3), lincRNA [lnc-RP11-582J16.5.1-3:1]	1.58215	5.6679	LPHN2
lnc-H3F3C-1:1	lnc-H3F3C-1	lnc-H3F3C-1:1 || lnc-H3F3C-1 || LNCipedia lincRNA (lnc-H3F3C-1), lincRNA [lnc-H3F3C-1:1]	1.58084	9.64507	FMO3
NM_000527	LDLR	NM_000527 || LDLR || Homo sapiens low density lipoprotein receptor (LDLR), transcript variant 1, mRNA [NM_000527]	1.58033	9.64507	VCAN
NM_003873	NRP1	NM_003873 || NRP1 || Homo sapiens neuropilin 1 (NRP1), transcript variant 1, mRNA [NM_003873]	1.5779	4.92061	EEPD1
NM_134470	IL1RAP	NM_134470 || IL1RAP || Homo sapiens interleukin 1 receptor accessory protein (IL1RAP), transcript variant 2, mRNA [NM_134470]	1.57528	4.75285	GAREM
NM_006558	KHDRBS3	NM_006558 || KHDRBS3 || Homo sapiens KH domain containing, RNA binding, signal transduction associated 3 (KHDRBS3), mRNA [NM_006558]	1.57457	3.82665	COLEC12
lnc-SNX9-2:1	lnc-SNX9-2	lnc-SNX9-2:1 || lnc-SNX9-2 || LNCipedia lincRNA (lnc-SNX9-2), lincRNA [lnc-SNX9-2:1]	1.57276	4.71698	BMP5
NM_031289	GSG1	NM_031289 || GSG1 || Homo sapiens germ cell associated 1 (GSG1), transcript variant 1, mRNA [NM_031289]	1.5721	8.93266	HLA-DMB
NR_002966	SNORA30	NR_002966 || SNORA30 || Homo sapiens small nucleolar RNA, H/ACA box 30 (SNORA30), small nucleolar RNA [NR_002966]	1.57205	4.98235	ACKR3
NM_174941	CD163L1	NM_174941 || CD163L1 || Homo sapiens CD163 molecule-like 1 (CD163L1), transcript variant 2, mRNA [NM_174941]	1.56836	8.59711	LNX1
NM_153267	MAMDC2	NM_153267 || MAMDC2 || Homo sapiens MAM domain containing 2 (MAMDC2), transcript variant 1, mRNA [NM_153267]	1.56479	9.37487	KCTD12
NM_182664	RASSF5	NM_182664 || RASSF5 || Homo sapiens Ras association (RalGDS/AF-6) domain family member 5 (RASSF5), transcript variant 2, mRNA [NM_182664]	1.56309	7.26238	PTGDR2
NR_001446	ANXA2P3	NR_001446 || ANXA2P3 || Homo sapiens annexin A2 pseudogene 3 (ANXA2P3), non-coding RNA [NR_001446]	1.56095	4.70739	PAPPA
NM_001143959	C2orf74	NM_001143959 || C2orf74 || Homo sapiens chromosome 2 open reading frame 74 (C2orf74), transcript variant 1, mRNA [NM_001143959]	1.56089	5.61912	SMOC1
ENST00000422542	LOC101927841	ENST00000422542 || LOC101927841 || PREDICTED: Homo sapiens uncharacterized LOC101927841 (LOC101927841), transcript variant X4, ncRNA [XR_428109]	1.55949	7.9889	YPEL1
NM_000245	MET	NM_000245 || MET || Homo sapiens MET proto-oncogene, receptor tyrosine kinase (MET), transcript variant 2, mRNA [NM_000245]	1.55948	4.81875	MINOS1-NBL1
NM_001161520	COG5	NM_001161520 || COG5 || Homo sapiens component of oligomeric golgi complex 5 (COG5), transcript variant 3, mRNA [NM_001161520]	1.55797	9.07271	ADH1A
lnc-NUPL1-2:1	lnc-NUPL1-2	lnc-NUPL1-2:1 || lnc-NUPL1-2 || LNCipedia lincRNA (lnc-NUPL1-2), lincRNA [lnc-NUPL1-2:1]	1.55769	3.82665	EMID1
NM_001278458	COBLL1	NM_001278458 || COBLL1 || Homo sapiens cordon-bleu WH2 repeat protein-like 1 (COBLL1), transcript variant 1, mRNA [NM_001278458]	1.55583	5.14355	WFDC1
NM_004362	CLGN	NM_004362 || CLGN || Homo sapiens calmegin (CLGN), transcript variant 1, mRNA [NM_004362]	1.5507	8.59711	MMD
NM_032930	C11orf70	NM_032930 || C11orf70 || Homo sapiens chromosome 11 open reading frame 70 (C11orf70), transcript variant 1, mRNA [NM_032930]	1.5504	6.35923	IGFBP5
NM_005603	ATP8B1	NM_005603 || ATP8B1 || Homo sapiens ATPase, aminophospholipid transporter, class I, type 8B, member 1 (ATP8B1), mRNA [NM_005603]	1.54654	5.61912	PLAT
AK127414	LOC100132495	AK127414 || LOC100132495 || Homo sapiens cDNA FLJ45506 fis, clone BRTHA2020695. [AK127414]	1.54589	5.68704	RFTN2
NM_031957	KRTAP1-5	NM_031957 || KRTAP1-5 || Homo sapiens keratin associated protein 1-5 (KRTAP1-5), mRNA [NM_031957]	1.54463	5.84628	FRZB
ENST00000370458	AFF2	ENST00000370458 || AFF2 || AF4/FMR2 family, member 2 [Source:HGNC Symbol;Acc:HGNC:3776] [ENST00000370458]	1.5431	4.18038	DLL1
ENST00000530270	RAB30-AS1	ENST00000530270 || RAB30-AS1 || RAB30 antisense RNA 1 (head to head) [Source:HGNC Symbol;Acc:HGNC:48672] [ENST00000530270]	1.54211	5.97223	VASH2
NM_032149	C4orf17	NM_032149 || C4orf17 || Homo sapiens chromosome 4 open reading frame 17 (C4orf17), mRNA [NM_032149]	1.5407	9.89917	CRISPLD2
lnc-CENPP-3:1	lnc-CENPP-3	lnc-CENPP-3:1 || lnc-CENPP-3 || LNCipedia lincRNA (lnc-CENPP-3), lincRNA [lnc-CENPP-3:1]	1.53946	6.51391	ARHGAP6
lnc-COL25A1-1:2	lnc-COL25A1-1	lnc-COL25A1-1:2 || lnc-COL25A1-1 || LNCipedia lincRNA (lnc-COL25A1-1), lincRNA [lnc-COL25A1-1:2]	1.53788	6.46758	NR4A2
NM_198465	NRK	NM_198465 || NRK || Homo sapiens Nik related kinase (NRK), mRNA [NM_198465]	1.53785	5.6679	NRG1
NR_033909	ECRP	NR_033909 || ECRP || Homo sapiens ribonuclease, RNase A family, 2 (liver, eosinophil-derived neurotoxin) pseudogene (ECRP), non-coding RNA [NR_033909]	1.53525	4.05175	EID3
lnc-KLHDC7B-1:1	lnc-KLHDC7B-1	lnc-KLHDC7B-1:1 || lnc-KLHDC7B-1 || LNCipedia lincRNA (lnc-KLHDC7B-1), lincRNA [lnc-KLHDC7B-1:1]	1.53409	5.4425	LOC100506098
NM_001291410	LOC653602	NM_001291410 || LOC653602 || Homo sapiens uncharacterized LOC653602 (LOC653602), mRNA [NM_001291410]	1.53064	4.50714	RGS2
NM_001110792	MECP2	NM_001110792 || MECP2 || Homo sapiens methyl CpG binding protein 2 (MECP2), transcript variant 2, mRNA [NM_001110792]	1.53031	5.88923	HSD17B2
NM_001038603	MARVELD2	NM_001038603 || MARVELD2 || Homo sapiens MARVEL domain containing 2 (MARVELD2), transcript variant 1, mRNA [NM_001038603]	1.52996	9.64507	NPTX1
NM_001018116	MURC	NM_001018116 || MURC || Homo sapiens muscle-related coiled-coil protein (MURC), mRNA [NM_001018116]	1.52774	8.59711	MERTK
ENST00000585503	JRK	ENST00000585503 || JRK || Jrk homolog (mouse) [Source:HGNC Symbol;Acc:HGNC:6199] [ENST00000585503]	1.52754	7.79817	TSPAN12
XR_425104	LOC102723817	XR_425104 || LOC102723817 || PREDICTED: Homo sapiens uncharacterized LOC102723817 (LOC102723817), ncRNA [XR_425104]	1.5265	9.07271	ADAMTS5
lnc-FBXO25-2:1	lnc-FBXO25-2	lnc-FBXO25-2:1 || lnc-FBXO25-2 || LNCipedia lincRNA (lnc-FBXO25-2), lincRNA [lnc-FBXO25-2:1]	1.52631	7.9889	SEMA4D
NR_110838	LOC101927087	NR_110838 || LOC101927087 || Homo sapiens uncharacterized LOC101927087 (LOC101927087), long non-coding RNA [NR_110838]	1.52627	4.89154	STOX2
NM_007341	SH3BGR	NM_007341 || SH3BGR || Homo sapiens SH3 domain binding glutamate-rich protein (SH3BGR), transcript variant 1, mRNA [NM_007341]	1.52559	5.6679	ADAMTS9
A_33_P3345031		A_33_P3345031 || unmapped	1.5226	0	PLA2G4A
NM_021954	GJA3	NM_021954 || GJA3 || Homo sapiens gap junction protein, alpha 3, 46kDa (GJA3), mRNA [NM_021954]	1.51802	9.07271	ASXL3
NR_034107	LOC257396	NR_034107 || LOC257396 || Homo sapiens uncharacterized LOC257396 (LOC257396), transcript variant 1, long non-coding RNA [NR_034107]	1.51731	3.61005	HS3ST1
NM_203422	LRRN4CL	NM_203422 || LRRN4CL || Homo sapiens LRRN4 C-terminal like (LRRN4CL), mRNA [NM_203422]	1.51647	3.87836	PDK4
NM_052913	TMEM200A	NM_052913 || TMEM200A || Homo sapiens transmembrane protein 200A (TMEM200A), transcript variant 4, mRNA [NM_052913]	1.51613	6.98267	AREG
ENST00000601437		ENST00000601437 || || KIAA1328 [Source:HGNC Symbol;Acc:HGNC:29248] [ENST00000601437]	1.51571	6.60113	RGS18
NM_183245	INVS	NM_183245 || INVS || Homo sapiens inversin (INVS), transcript variant 2, mRNA [NM_183245]	1.51283	7.26238	HBBP1
NM_032591	SLC9A7	NM_032591 || SLC9A7 || Homo sapiens solute carrier family 9, subfamily A (NHE7, cation proton antiporter 7), member 7 (SLC9A7), transcript variant 2, mRNA [NM_032591]	1.5126	7.9889	PTGS2
NM_001221	CAMK2D	NM_001221 || CAMK2D || Homo sapiens calcium/calmodulin-dependent protein kinase II delta (CAMK2D), transcript variant 3, mRNA [NM_001221]	1.51256	6.51391	EDNRB
NM_024754	PTCD2	NM_024754 || PTCD2 || Homo sapiens pentatricopeptide repeat domain 2 (PTCD2), transcript variant 1, mRNA [NM_024754]	1.5125	5.14355	SOX2-OT
A_33_P3314121		A_33_P3314121 || unmapped	1.51224	7.79817	KIAA1257
lnc-SCAP-1:1	lnc-SCAP-1	lnc-SCAP-1:1 || lnc-SCAP-1 || Homo sapiens cDNA clone IMAGE:5272313. [BC036224]	1.51191	8.29957
lnc-FSIP1-1:1	lnc-FSIP1-1	lnc-FSIP1-1:1 || lnc-FSIP1-1 || LNCipedia lincRNA (lnc-FSIP1-1), lincRNA [lnc-FSIP1-1:1]	1.50953	9.37487
ENST00000567515		ENST00000567515 || || Unknown	1.50932	8.59711
NM_001146037	SLC14A1	NM_001146037 || SLC14A1 || Homo sapiens solute carrier family 14 (urea transporter), member 1 (Kidd blood group) (SLC14A1), transcript variant 4, mRNA [NM_001146037]	1.50906	8.10083
lnc-RAD23B-11:1	lnc-RAD23B-11	lnc-RAD23B-11:1 || lnc-RAD23B-11 || LNCipedia lincRNA (lnc-RAD23B-11), lincRNA [lnc-RAD23B-11:1]	1.50879	4.99129
ENST00000568384		ENST00000568384 || || Homo sapiens cDNA: FLJ23060 fis, clone LNG04601. [AK026713]	1.50819	5.9606
lnc-PROC-2:1	lnc-PROC-2	lnc-PROC-2:1 || lnc-PROC-2 || DB462743 RIKEN full-length enriched human cDNA library, testis Homo sapiens cDNA clone H013099M14 5', mRNA sequence [DB462743]	1.50728	4.33405
NR_026837	TRHDE-AS1	NR_026837 || TRHDE-AS1 || Homo sapiens TRHDE antisense RNA 1 (TRHDE-AS1), transcript variant 1, long non-coding RNA [NR_026837]	1.50716	8.59711
lnc-EIF2C2-2:1	lnc-EIF2C2-2	lnc-EIF2C2-2:1 || lnc-EIF2C2-2 || Homo sapiens cDNA clone IMAGE:5287899. [BC043181]	1.50658	9.07271
A_33_P3284873		A_33_P3284873 || unmapped	1.50617	5.68704
NM_152701	ABCA13	NM_152701 || ABCA13 || Homo sapiens ATP-binding cassette, sub-family A (ABC1), member 13 (ABCA13), mRNA [NM_152701]	1.50612	4.69026
NM_001267571	TBC1D2	NM_001267571 || TBC1D2 || Homo sapiens TBC1 domain family, member 2 (TBC1D2), transcript variant 1, mRNA [NM_001267571]	1.50606	4.66472
NM_153811	SLC38A6	NM_153811 || SLC38A6 || Homo sapiens solute carrier family 38, member 6 (SLC38A6), transcript variant 2, mRNA [NM_153811]	1.50476	4.61277
NM_001013398	IGFBP3	NM_001013398 || IGFBP3 || Homo sapiens insulin-like growth factor binding protein 3 (IGFBP3), transcript variant 1, mRNA [NM_001013398]	1.50458	7.09035
ENST00000367368	LRP11	ENST00000367368 || LRP11 || low density lipoprotein receptor-related protein 11 [Source:HGNC Symbol;Acc:HGNC:16936] [ENST00000367368]	1.50419	7.9889
NR_030732	WFDC21P	NR_030732 || WFDC21P || Homo sapiens WAP four-disulfide core domain 21, pseudogene (WFDC21P), non-coding RNA [NR_030732]	1.50318	4.98235
lnc-LIFR-1:1	lnc-LIFR-1	lnc-LIFR-1:1 || lnc-LIFR-1 || LNCipedia lincRNA (lnc-LIFR-1), lincRNA [lnc-LIFR-1:1]	1.50115	1.66376
NM_001111101	CNRIP1	NM_001111101 || CNRIP1 || Homo sapiens cannabinoid receptor interacting protein 1 (CNRIP1), transcript variant CRIP1b, mRNA [NM_001111101]	1.50055	9.07271
ENST00000558920		ENST00000558920 || || Unknown	1.50009	3.77517
NM_001018072	BTBD11	NM_001018072 || BTBD11 || Homo sapiens BTB (POZ) domain containing 11 (BTBD11), transcript variant a, mRNA [NM_001018072]	0.666635	7.26238
NM_004445	EPHB6	NM_004445 || EPHB6 || Homo sapiens EPH receptor B6 (EPHB6), transcript variant 1, mRNA [NM_004445]	0.665397	4.67479
NM_178859	SLC51B	NM_178859 || SLC51B || Homo sapiens solute carrier family 51, beta subunit (SLC51B), mRNA [NM_178859]	0.665153	8.59711
NM_206827	RASL11A	NM_206827 || RASL11A || Homo sapiens RAS-like, family 11, member A (RASL11A), mRNA [NM_206827]	0.664923	6.46758
ENST00000434985	LOC101930346	ENST00000434985 || LOC101930346 || PREDICTED: Homo sapiens uncharacterized LOC101930346 (LOC101930346), transcript variant X2, ncRNA [XR_426076]	0.664051	4.98235
NR_103486	DNM3OS	NR_103486 || DNM3OS || Homo sapiens DNM3 opposite strand/antisense RNA (DNM3OS), transcript variant 2, long non-coding RNA [NR_103486]	0.663928	7.26238
NM_173200	NR4A3	NM_173200 || NR4A3 || Homo sapiens nuclear receptor subfamily 4, group A, member 3 (NR4A3), transcript variant 3, mRNA [NM_173200]	0.663894	4.75259
ENST00000441415		ENST00000441415 || || PREDICTED: Homo sapiens uncharacterized LOC101929381 (LOC101929381), transcript variant X2, ncRNA [XR_426197]	0.663855	6.77097
NM_000631	NCF4	NM_000631 || NCF4 || Homo sapiens neutrophil cytosolic factor 4, 40kDa (NCF4), transcript variant 1, mRNA [NM_000631]	0.660187	9.89917
NM_001130518	CSGALNACT1	NM_001130518 || CSGALNACT1 || Homo sapiens chondroitin sulfate N-acetylgalactosaminyltransferase 1 (CSGALNACT1), transcript variant 1, mRNA [NM_001130518]	0.659602	4.29961
NM_001204375	NPR3	NM_001204375 || NPR3 || Homo sapiens natriuretic peptide receptor 3 (NPR3), transcript variant 1, mRNA [NM_001204375]	0.659344	8.82064
lnc-DCT-1:1	lnc-DCT-1	lnc-DCT-1:1 || lnc-DCT-1 || LNCipedia lincRNA (lnc-DCT-1), lincRNA [lnc-DCT-1:1]	0.658852	2.94358
lnc-CBX2-1:1	lnc-CBX2-1	lnc-CBX2-1:1 || lnc-CBX2-1 || Q96EX9_HUMAN (Q96EX9) C14orf78 protein (Fragment), partial (4%) [THC2643699]	0.658194	4.99129
NM_001164416	H2BFM	NM_001164416 || H2BFM || Homo sapiens H2B histone family, member M (H2BFM), mRNA [NM_001164416]	0.657284	4.90597
NM_000104	CYP1B1	NM_000104 || CYP1B1 || Homo sapiens cytochrome P450, family 1, subfamily B, polypeptide 1 (CYP1B1), mRNA [NM_000104]	0.657021	5.9606
NM_001433	ERN1	NM_001433 || ERN1 || Homo sapiens endoplasmic reticulum to nucleus signaling 1 (ERN1), mRNA [NM_001433]	0.655828	8.10083
NM_009587	LGALS9	NM_009587 || LGALS9 || Homo sapiens lectin, galactoside-binding, soluble, 9 (LGALS9), transcript variant 1, mRNA [NM_009587]	0.655114	8.59711
NM_005261	GEM	NM_005261 || GEM || Homo sapiens GTP binding protein overexpressed in skeletal muscle (GEM), transcript variant 1, mRNA [NM_005261]	0.655111	5.4425
NM_033495	KLHL13	NM_033495 || KLHL13 || Homo sapiens kelch-like family member 13 (KLHL13), transcript variant 1, mRNA [NM_033495]	0.654828	6.98267
NM_002048	GAS1	NM_002048 || GAS1 || Homo sapiens growth arrest-specific 1 (GAS1), mRNA [NM_002048]	0.654002	3.87836
NR_027064	TINCR	NR_027064 || TINCR || Homo sapiens tissue differentiation-inducing non-protein coding RNA (TINCR), long non-coding RNA [NR_027064]	0.653879	7.26238
NM_198194	STOM	NM_198194 || STOM || Homo sapiens stomatin (STOM), transcript variant 2, mRNA [NM_198194]	0.653441	7.79817
NM_173582	PGM2L1	NM_173582 || PGM2L1 || Homo sapiens phosphoglucomutase 2-like 1 (PGM2L1), mRNA [NM_173582]	0.65335	6.60113
NM_015065	EXPH5	NM_015065 || EXPH5 || Homo sapiens exophilin 5 (EXPH5), mRNA [NM_015065]	0.651987	6.2676
NM_021222	PRUNE	NM_021222 || PRUNE || Homo sapiens prune exopolyphosphatase (PRUNE), transcript variant 1, mRNA [NM_021222]	0.649847	9.89917
NM_015931	SSUH2	NM_015931 || SSUH2 || Homo sapiens ssu-2 homolog (C. elegans) (SSUH2), transcript variant 3, mRNA [NM_015931]	0.648	5.24393
NM_207627	ABCG1	NM_207627 || ABCG1 || Homo sapiens ATP-binding cassette, sub-family G (WHITE), member 1 (ABCG1), transcript variant 5, mRNA [NM_207627]	0.64536	5.68704
NM_032855	HSH2D	NM_032855 || HSH2D || Homo sapiens hematopoietic SH2 domain containing (HSH2D), transcript variant 1, mRNA [NM_032855]	0.645303	8.29957
THC2560209		THC2560209 || || Q6IPX1_HUMAN (Q6IPX1) TBC1 domain family, member 3, partial (28%) [THC2560209]	0.644709	7.79817
NM_014936	ENPP4	NM_014936 || ENPP4 || Homo sapiens ectonucleotide pyrophosphatase/phosphodiesterase 4 (putative) (ENPP4), mRNA [NM_014936]	0.644136	5.61912
NM_004609	TCF15	NM_004609 || TCF15 || Homo sapiens transcription factor 15 (basic helix-loop-helix) (TCF15), mRNA [NM_004609]	0.643113	8.29957
ENST00000462089	GOLGA2	ENST00000462089 || GOLGA2 || golgin A2 [Source:HGNC Symbol;Acc:HGNC:4425] [ENST00000462089]	0.642143	8.29957
NM_020808	SIPA1L2	NM_020808 || SIPA1L2 || Homo sapiens signal-induced proliferation-associated 1 like 2 (SIPA1L2), mRNA [NM_020808]	0.639071	4.99129
NM_021205	RHOU	NM_021205 || RHOU || Homo sapiens ras homolog family member U (RHOU), transcript variant 1, mRNA [NM_021205]	0.638671	4.81875
AK126772	LOC100128517	AK126772 || LOC100128517 || Homo sapiens cDNA FLJ44820 fis, clone BRACE3046049. [AK126772]	0.637615	4.61277
NM_004979	KCND1	NM_004979 || KCND1 || Homo sapiens potassium channel, voltage gated Shal related subfamily D, member 1 (KCND1), mRNA [NM_004979]	0.637338	7.9889
ENST00000430247		ENST00000430247 || || PREDICTED: Homo sapiens uncharacterized LOC101928011 (LOC101928011), ncRNA [XR_244302]	0.635857	4.92061
NM_021969	NR0B2	NM_021969 || NR0B2 || Homo sapiens nuclear receptor subfamily 0, group B, member 2 (NR0B2), mRNA [NM_021969]	0.635064	5.10761
ENST00000360835	SCUBE1	ENST00000360835 || SCUBE1 || signal peptide, CUB domain, EGF-like 1 [Source:HGNC Symbol;Acc:HGNC:13441] [ENST00000360835]	0.634872	4.98235
ENST00000413826	NPR1	ENST00000413826 || NPR1 || natriuretic peptide receptor 1 [Source:HGNC Symbol;Acc:HGNC:7943] [ENST00000413826]	0.634406	7.79817
NM_018490	LGR4	NM_018490 || LGR4 || Homo sapiens leucine-rich repeat containing G protein-coupled receptor 4 (LGR4), mRNA [NM_018490]	0.633975	5.97223
NM_016140	TPPP3	NM_016140 || TPPP3 || Homo sapiens tubulin polymerization-promoting protein family member 3 (TPPP3), transcript variant 1, mRNA [NM_016140]	0.632403	5.07427
NM_017784	OSBPL10	NM_017784 || OSBPL10 || Homo sapiens oxysterol binding protein-like 10 (OSBPL10), transcript variant 1, mRNA [NM_017784]	0.630303	8.59711
lnc-GPR20-1:1	lnc-GPR20-1	lnc-GPR20-1:1 || lnc-GPR20-1 || LNCipedia lincRNA (lnc-GPR20-1), lincRNA [lnc-GPR20-1:1]	0.629395	6.35923
NM_015150	RFTN1	NM_015150 || RFTN1 || Homo sapiens raftlin, lipid raft linker 1 (RFTN1), mRNA [NM_015150]	0.628371	4.71698
TCONS_l2_00031187	XLOC_l2_016079	TCONS_l2_00031187 || XLOC_l2_016079 || BROAD Institute lincRNA (XLOC_l2_016079), lincRNA [TCONS_l2_00031187]	0.628319	8.82064
ENST00000463835	TNFRSF14	ENST00000463835 || TNFRSF14 || tumor necrosis factor receptor superfamily, member 14 [Source:HGNC Symbol;Acc:HGNC:11912] [ENST00000463835]	0.627458	5.18868
NM_030916	PVRL4	NM_030916 || PVRL4 || Homo sapiens poliovirus receptor-related 4 (PVRL4), mRNA [NM_030916]	0.626192	9.64507
NM_153746	ZDHHC14	NM_153746 || ZDHHC14 || Homo sapiens zinc finger, DHHC-type containing 14 (ZDHHC14), transcript variant 2, mRNA [NM_153746]	0.625759	8.29957
NM_001010000	ARHGAP28	NM_001010000 || ARHGAP28 || Homo sapiens Rho GTPase activating protein 28 (ARHGAP28), mRNA [NM_001010000]	0.624084	7.26238
NR_027335	URAHP	NR_027335 || URAHP || Homo sapiens urate (hydroxyiso-) hydrolase, pseudogene (URAHP), transcript variant 2, non-coding RNA [NR_027335]	0.623801	4.99129
NM_001206	KLF9	NM_001206 || KLF9 || Homo sapiens Kruppel-like factor 9 (KLF9), mRNA [NM_001206]	0.623691	5.11194
NR_027917	CTSL3P	NR_027917 || CTSL3P || Homo sapiens cathepsin L family member 3, pseudogene (CTSL3P), non-coding RNA [NR_027917]	0.622061	5.24393
NM_001463	FRZB	NM_001463 || FRZB || Homo sapiens frizzled-related protein (FRZB), mRNA [NM_001463]	0.621553	4.92061
NM_000962	PTGS1	NM_000962 || PTGS1 || Homo sapiens prostaglandin-endoperoxide synthase 1 (prostaglandin G/H synthase and cyclooxygenase) (PTGS1), transcript variant 1, mRNA [NM_000962]	0.620493	6.77097
NM_001814	CTSC	NM_001814 || CTSC || Homo sapiens cathepsin C (CTSC), transcript variant 1, mRNA [NM_001814]	0.620033	9.37487
NM_018659	CYTL1	NM_018659 || CYTL1 || Homo sapiens cytokine-like 1 (CYTL1), mRNA [NM_018659]	0.619118	4.25184
NM_152474	C19orf18	NM_152474 || C19orf18 || Homo sapiens chromosome 19 open reading frame 18 (C19orf18), mRNA [NM_152474]	0.617739	8.93266
NM_001014448	CPZ	NM_001014448 || CPZ || Homo sapiens carboxypeptidase Z (CPZ), transcript variant 3, mRNA [NM_001014448]	0.616773	7.79817
NM_001297705	LPHN2	NM_001297705 || LPHN2 || Homo sapiens latrophilin 2 (LPHN2), transcript variant 3, mRNA [NM_001297705]	0.615282	7.26238
NM_004778	PTGDR2	NM_004778 || PTGDR2 || Homo sapiens prostaglandin D2 receptor 2 (PTGDR2), mRNA [NM_004778]	0.614165	9.64507
NM_005308	GRK5	NM_005308 || GRK5 || Homo sapiens G protein-coupled receptor kinase 5 (GRK5), mRNA [NM_005308]	0.614106	4.71297
lnc-NDST2-3:1	lnc-NDST2-3	lnc-NDST2-3:1 || lnc-NDST2-3 || LNCipedia lincRNA (lnc-NDST2-3), lincRNA [lnc-NDST2-3:1]	0.613591	4.99129
NM_031476	CRISPLD2	NM_031476 || CRISPLD2 || Homo sapiens cysteine-rich secretory protein LCCL domain containing 2 (CRISPLD2), mRNA [NM_031476]	0.61271	7.79817
NM_001448	GPC4	NM_001448 || GPC4 || Homo sapiens glypican 4 (GPC4), mRNA [NM_001448]	0.612463	5.61912
NM_000667	ADH1A	NM_000667 || ADH1A || Homo sapiens alcohol dehydrogenase 1A (class I), alpha polypeptide (ADH1A), mRNA [NM_000667]	0.612147	8.29957
NM_199327	SPRY1	NM_199327 || SPRY1 || Homo sapiens sprouty homolog 1, antagonist of FGF signaling (Drosophila) (SPRY1), transcript variant 2, mRNA [NM_199327]	0.610126	4.42277
NM_020182	PMEPA1	NM_020182 || PMEPA1 || Homo sapiens prostate transmembrane protein, androgen induced 1 (PMEPA1), transcript variant 1, mRNA [NM_020182]	0.609156	8.93266
lnc-ACTR2-1:1	lnc-ACTR2-1	lnc-ACTR2-1:1 || lnc-ACTR2-1 || LNCipedia lincRNA (lnc-ACTR2-1), lincRNA [lnc-ACTR2-1:1]	0.605975	5.4425
NM_005460	SNCAIP	NM_005460 || SNCAIP || Homo sapiens synuclein, alpha interacting protein (SNCAIP), transcript variant 1, mRNA [NM_005460]	0.602909	7.26238
NM_030636	EEPD1	NM_030636 || EEPD1 || Homo sapiens endonuclease/exonuclease/phosphatase family domain containing 1 (EEPD1), mRNA [NM_030636]	0.602662	9.37487
NM_014452	TNFRSF21	NM_014452 || TNFRSF21 || Homo sapiens tumor necrosis factor receptor superfamily, member 21 (TNFRSF21), mRNA [NM_014452]	0.602011	3.61005
NM_144966	FREM1	NM_144966 || FREM1 || Homo sapiens FRAS1 related extracellular matrix 1 (FREM1), transcript variant 1, mRNA [NM_144966]	0.601924	5.24393
NM_006714	SMPDL3A	NM_006714 || SMPDL3A || Homo sapiens sphingomyelin phosphodiesterase, acid-like 3A (SMPDL3A), transcript variant 1, mRNA [NM_006714]	0.601448	5.4425
lnc-RADIL-3:1	lnc-RADIL-3	lnc-RADIL-3:1 || lnc-RADIL-3 || LNCipedia lincRNA (lnc-RADIL-3), lincRNA [lnc-RADIL-3:1]	0.594349	4.61277
NM_018945	PDE7B	NM_018945 || PDE7B || Homo sapiens phosphodiesterase 7B (PDE7B), mRNA [NM_018945]	0.593208	6.77097
NM_000418	IL4R	NM_000418 || IL4R || Homo sapiens interleukin 4 receptor (IL4R), transcript variant 1, mRNA [NM_000418]	0.592542	3.70321
NR_001443	KRT17P5	NR_001443 || KRT17P5 || Homo sapiens keratin 17 pseudogene 5 (KRT17P5), non-coding RNA [NR_001443]	0.59247	9.64507
NM_014636	RALGPS1	NM_014636 || RALGPS1 || Homo sapiens Ral GEF with PH domain and SH3 binding motif 1 (RALGPS1), transcript variant 1, mRNA [NM_014636]	0.591443	4.69026
ENST00000624510	C8orf89	ENST00000624510 || C8orf89 || chromosome 8 open reading frame 89 [Source:HGNC Symbol;Acc:HGNC:51258] [ENST00000624510]	0.589481	8.29957
NM_015009	PDZRN3	NM_015009 || PDZRN3 || Homo sapiens PDZ domain containing ring finger 3 (PDZRN3), transcript variant 1, mRNA [NM_015009]	0.589453	5.61912
NM_031890	CECR6	NM_031890 || CECR6 || Homo sapiens cat eye syndrome chromosome region, candidate 6 (CECR6), transcript variant 1, mRNA [NM_031890]	0.58485	6.98267
NM_004385	VCAN	NM_004385 || VCAN || Homo sapiens versican (VCAN), transcript variant 1, mRNA [NM_004385]	0.584804	8.10083
NM_004613	TGM2	NM_004613 || TGM2 || Homo sapiens transglutaminase 2 (TGM2), transcript variant 1, mRNA [NM_004613]	0.584546	5.4425
NM_001037341	PDE4B	NM_001037341 || PDE4B || Homo sapiens phosphodiesterase 4B, cAMP-specific (PDE4B), transcript variant d, mRNA [NM_001037341]	0.584212	4.29961
NM_006206	PDGFRA	NM_006206 || PDGFRA || Homo sapiens platelet-derived growth factor receptor, alpha polypeptide (PDGFRA), mRNA [NM_006206]	0.584199	4.61277
A_33_P3250263		A_33_P3250263 || unmapped	0.584166	7.59525
NM_133455	EMID1	NM_133455 || EMID1 || Homo sapiens EMI domain containing 1 (EMID1), transcript variant 1, mRNA [NM_133455]	0.581474	5.4425
NM_181776	SLC36A2	NM_181776 || SLC36A2 || Homo sapiens solute carrier family 36 (proton/amino acid symporter), member 2 (SLC36A2), mRNA [NM_181776]	0.579798	9.89917
NM_002581	PAPPA	NM_002581 || PAPPA || Homo sapiens pregnancy-associated plasma protein A, pappalysin 1 (PAPPA), mRNA [NM_002581]	0.579119	5.61912
NM_001002294	FMO3	NM_001002294 || FMO3 || Homo sapiens flavin containing monooxygenase 3 (FMO3), transcript variant 2, mRNA [NM_001002294]	0.576759	9.37487
NM_002118	HLA-DMB	NM_002118 || HLA-DMB || Homo sapiens major histocompatibility complex, class II, DM beta (HLA-DMB), mRNA [NM_002118]	0.57593	9.64507
BX350880		BX350880 || || BX350880 Homo sapiens NEUROBLASTOMA COT 25-NORMALIZED Homo sapiens cDNA clone CS0DC005YN21 3-PRIME, mRNA sequence [BX350880]	0.574361	6.2676
lnc-CCDC117-1:4	lnc-CCDC117-1	lnc-CCDC117-1:4 || lnc-CCDC117-1 || LNCipedia lincRNA (lnc-CCDC117-1), lincRNA [lnc-CCDC117-1:4]	0.57169	9.64507
AK124859	LOC100129846	AK124859 || LOC100129846 || Homo sapiens cDNA FLJ42869 fis, clone BRHIP2022221. [AK124859]	0.570444	4.75409
NM_017508	SOX6	NM_017508 || SOX6 || Homo sapiens SRY (sex determining region Y)-box 6 (SOX6), transcript variant 1, mRNA [NM_017508]	0.563495	8.29957
ENST00000538294	LOC100507065	ENST00000538294 || LOC100507065 || Unknown	0.56293	4.81875
NM_173354	SIK1	NM_173354 || SIK1 || Homo sapiens salt-inducible kinase 1 (SIK1), mRNA [NM_173354]	0.560498	5.18868
NM_003275	TMOD1	NM_003275 || TMOD1 || Homo sapiens tropomodulin 1 (TMOD1), transcript variant 1, mRNA [NM_003275]	0.5588	5.24393
NR_110868	LOC101929767	NR_110868 || LOC101929767 || Homo sapiens uncharacterized LOC101929767 (LOC101929767), long non-coding RNA [NR_110868]	0.55506	7.79817
NM_000864	HTR1D	NM_000864 || HTR1D || Homo sapiens 5-hydroxytryptamine (serotonin) receptor 1D, G protein-coupled (HTR1D), mRNA [NM_000864]	0.553865	4.1594
NM_001146312	MYOCD	NM_001146312 || MYOCD || Homo sapiens myocardin (MYOCD), transcript variant 1, mRNA [NM_001146312]	0.553749	8.29957
NM_001303429	PIK3R3	NM_001303429 || PIK3R3 || Homo sapiens phosphoinositide-3-kinase, regulatory subunit 3 (gamma) (PIK3R3), transcript variant 5, mRNA [NM_001303429]	0.552341	5.61912
ENST00000426799		ENST00000426799 || || Unknown	0.551843	3.74162
NM_020311	ACKR3	NM_020311 || ACKR3 || Homo sapiens atypical chemokine receptor 3 (ACKR3), mRNA [NM_020311]	0.549188	6.35923
NM_012329	MMD	NM_012329 || MMD || Homo sapiens monocyte to macrophage differentiation-associated (MMD), mRNA [NM_012329]	0.549173	4.81875
NM_138444	KCTD12	NM_138444 || KCTD12 || Homo sapiens potassium channel tetramerization domain containing 12 (KCTD12), mRNA [NM_138444]	0.54642	6.35923
NM_172244	SGCD	NM_172244 || SGCD || Homo sapiens sarcoglycan, delta (35kDa dystrophin-associated glycoprotein) (SGCD), transcript variant 2, mRNA [NM_172244]	0.54493	7.59525
NM_000599	IGFBP5	NM_000599 || IGFBP5 || Homo sapiens insulin-like growth factor binding protein 5 (IGFBP5), mRNA [NM_000599]	0.542169	7.26238
NM_144629	RFTN2	NM_144629 || RFTN2 || Homo sapiens raftlin family member 2 (RFTN2), mRNA [NM_144629]	0.540547	5.24393
ENST00000439058	LOC100506098	ENST00000439058 || LOC100506098 || PREDICTED: Homo sapiens uncharacterized LOC100506098 (LOC100506098), transcript variant X3, ncRNA [XR_108746]	0.538847	7.26238
NM_022751	GAREM	NM_022751 || GAREM || Homo sapiens GRB2 associated, regulator of MAPK1 (GAREM), transcript variant 2, mRNA [NM_022751]	0.537298	6.60113
NM_030632	ASXL3	NM_030632 || ASXL3 || Homo sapiens additional sex combs like transcriptional regulator 3 (ASXL3), mRNA [NM_030632]	0.530768	8.29957
NM_001204088	MINOS1-NBL1	NM_001204088 || MINOS1-NBL1 || Homo sapiens MINOS1-NBL1 readthrough (MINOS1-NBL1), transcript variant 1, mRNA [NM_001204088]	0.530064	8.59711
NM_002230	JUP	NM_002230 || JUP || Homo sapiens junction plakoglobin (JUP), transcript variant 1, mRNA [NM_002230]	0.524777	4.61277
NM_021197	WFDC1	NM_021197 || WFDC1 || Homo sapiens WAP four-disulfide core domain 1 (WFDC1), transcript variant 1, mRNA [NM_021197]	0.524499	7.79817
lnc-BDKRB1-1:1	lnc-BDKRB1-1	lnc-BDKRB1-1:1 || lnc-BDKRB1-1 || LNCipedia lincRNA (lnc-BDKRB1-1), lincRNA [lnc-BDKRB1-1:1]	0.524278	7.79817
NM_006343	MERTK	NM_006343 || MERTK || Homo sapiens MER proto-oncogene, tyrosine kinase (MERTK), mRNA [NM_006343]	0.514302	8.59711
NM_001039570	KREMEN1	NM_001039570 || KREMEN1 || Homo sapiens kringle containing transmembrane protein 1 (KREMEN1), transcript variant 3, mRNA [NM_001039570]	0.513263	6.35923
NM_001297706	LPHN2	NM_001297706 || LPHN2 || Homo sapiens latrophilin 2 (LPHN2), transcript variant 4, mRNA [NM_001297706]	0.513199	8.93266
lnc-SPOPL-3:1	lnc-SPOPL-3	lnc-SPOPL-3:1 || lnc-SPOPL-3 || LNCipedia lincRNA (lnc-SPOPL-3), lincRNA [lnc-SPOPL-3:1]	0.512986	4.42277
NM_022137	SMOC1	NM_022137 || SMOC1 || Homo sapiens SPARC related modular calcium binding 1 (SMOC1), transcript variant 2, mRNA [NM_022137]	0.509645	3.88804
NM_000930	PLAT	NM_000930 || PLAT || Homo sapiens plasminogen activator, tissue (PLAT), transcript variant 1, mRNA [NM_000930]	0.504881	4.25184
NM_032622	LNX1	NM_032622 || LNX1 || Homo sapiens ligand of numb-protein X 1, E3 ubiquitin protein ligase (LNX1), transcript variant 2, mRNA [NM_032622]	0.504529	5.24393
NM_001114173	CTSC	NM_001114173 || CTSC || Homo sapiens cathepsin C (CTSC), transcript variant 3, mRNA [NM_001114173]	0.501664	8.29957
NM_001008394	EID3	NM_001008394 || EID3 || Homo sapiens EP300 interacting inhibitor of differentiation 3 (EID3), mRNA [NM_001008394]	0.496524	4.67479
lnc-LRTM2-2:1	lnc-LRTM2-2	lnc-LRTM2-2:1 || lnc-LRTM2-2 || 603077963F1 NIH_MGC_119 Homo sapiens cDNA clone IMAGE:5169974 5', mRNA sequence [BI827305]	0.496088	4.44255
lnc-C14orf37-1:1	lnc-C14orf37-1	lnc-C14orf37-1:1 || lnc-C14orf37-1 || Homo sapiens cDNA clone IMAGE:5276765. [BC031314]	0.492974	5.24393
NM_024749	VASH2	NM_024749 || VASH2 || Homo sapiens vasohibin 2 (VASH2), transcript variant 1, mRNA [NM_024749]	0.49211	5.0406
NM_148170	CTSC	NM_148170 || CTSC || Homo sapiens cathepsin C (CTSC), transcript variant 2, mRNA [NM_148170]	0.489551	8.93266
NM_198389	PDPN	NM_198389 || PDPN || Homo sapiens podoplanin (PDPN), transcript variant 2, mRNA [NM_198389]	0.488562	5.79185
NM_130386	COLEC12	NM_130386 || COLEC12 || Homo sapiens collectin sub-family member 12 (COLEC12), mRNA [NM_130386]	0.482768	3.92477
NM_013427	ARHGAP6	NM_013427 || ARHGAP6 || Homo sapiens Rho GTPase activating protein 6 (ARHGAP6), transcript variant 1, mRNA [NM_013427]	0.48173	4.72791
NM_018286	TMEM100	NM_018286 || TMEM100 || Homo sapiens transmembrane protein 100 (TMEM100), transcript variant 2, mRNA [NM_018286]	0.478921	9.64507
NM_021073	BMP5	NM_021073 || BMP5 || Homo sapiens bone morphogenetic protein 5 (BMP5), mRNA [NM_021073]	0.477703	4.59198
NM_013313	YPEL1	NM_013313 || YPEL1 || Homo sapiens yippee-like 1 (Drosophila) (YPEL1), mRNA [NM_013313]	0.474189	0
NM_012338	TSPAN12	NM_012338 || TSPAN12 || Homo sapiens tetraspanin 12 (TSPAN12), mRNA [NM_012338]	0.469731	6.98267
NM_004495	NRG1	NM_004495 || NRG1 || Homo sapiens neuregulin 1 (NRG1), transcript variant HRG-gamma, mRNA [NM_004495]	0.455823	7.59525
NM_005618	DLL1	NM_005618 || DLL1 || Homo sapiens delta-like 1 (Drosophila) (DLL1), mRNA [NM_005618]	0.454745	1.77984
NM_000596	IGFBP1	NM_000596 || IGFBP1 || Homo sapiens insulin-like growth factor binding protein 1 (IGFBP1), mRNA [NM_000596]	0.450855	7.79817
NM_002153	HSD17B2	NM_002153 || HSD17B2 || Homo sapiens hydroxysteroid (17-beta) dehydrogenase 2 (HSD17B2), mRNA [NM_002153]	0.449534	4.31172
NM_002923	RGS2	NM_002923 || RGS2 || Homo sapiens regulator of G-protein signaling 2 (RGS2), mRNA [NM_002923]	0.444486	1.77984
NM_080759	DACH1	NM_080759 || DACH1 || Homo sapiens dachshund family transcription factor 1 (DACH1), transcript variant 1, mRNA [NM_080759]	0.44101	9.64507
NM_032849	MEDAG	NM_032849 || MEDAG || Homo sapiens mesenteric estrogen-dependent adipogenesis (MEDAG), mRNA [NM_032849]	0.439292	5.68704
NM_006186	NR4A2	NM_006186 || NR4A2 || Homo sapiens nuclear receptor subfamily 4, group A, member 2 (NR4A2), mRNA [NM_006186]	0.435203	4.29961
NM_002522	NPTX1	NM_002522 || NPTX1 || Homo sapiens neuronal pentraxin I (NPTX1), mRNA [NM_002522]	0.433874	8.29957
NM_001145033	C11orf96	NM_001145033 || C11orf96 || Homo sapiens chromosome 11 open reading frame 96 (C11orf96), mRNA [NM_001145033]	0.42629	4.75409
NR_075093	SOX2-OT	NR_075093 || SOX2-OT || Homo sapiens SOX2 overlapping transcript (SOX2-OT), transcript variant 3, long non-coding RNA [NR_075093]	0.424156	8.59711
NM_007038	ADAMTS5	NM_007038 || ADAMTS5 || Homo sapiens ADAM metallopeptidase with thrombospondin type 1 motif, 5 (ADAMTS5), mRNA [NM_007038]	0.416024	3.1238
NM_182920	ADAMTS9	NM_182920 || ADAMTS9 || Homo sapiens ADAM metallopeptidase with thrombospondin type 1 motif, 9 (ADAMTS9), mRNA [NM_182920]	0.414445	5.07427
NR_026860	LINC00473	NR_026860 || LINC00473 || Homo sapiens long intergenic non-protein coding RNA 473 (LINC00473), transcript variant 1, long non-coding RNA [NR_026860]	0.413274	5.10761
NM_024420	PLA2G4A	NM_024420 || PLA2G4A || Homo sapiens phospholipase A2, group IVA (cytosolic, calcium-dependent) (PLA2G4A), mRNA [NM_024420]	0.401918	6.77097
NM_001080406	C12orf71	NM_001080406 || C12orf71 || Homo sapiens chromosome 12 open reading frame 71 (C12orf71), mRNA [NM_001080406]	0.396005	5.88923
NM_001142287	SEMA4D	NM_001142287 || SEMA4D || Homo sapiens sema domain, immunoglobulin domain (Ig), transmembrane domain (TM) and short cytoplasmic domain, (semaphorin) 4D (SEMA4D), transcript variant 2, mRNA [NM_001142287]	0.388852	9.07271
NM_005114	HS3ST1	NM_005114 || HS3ST1 || Homo sapiens heparan sulfate (glucosamine) 3-O-sulfotransferase 1 (HS3ST1), mRNA [NM_005114]	0.3849	4.42277
NM_020225	STOX2	NM_020225 || STOX2 || Homo sapiens storkhead box 2 (STOX2), mRNA [NM_020225]	0.376968	3.79366
NM_020741	KIAA1257	NM_020741 || KIAA1257 || Homo sapiens KIAA1257 (KIAA1257), mRNA [NM_020741]	0.367653	7.09035
NR_001589	HBBP1	NR_001589 || HBBP1 || Homo sapiens hemoglobin, beta pseudogene 1 (HBBP1), non-coding RNA [NR_001589]	0.365481	8.82064
NM_006378	SEMA4D	NM_006378 || SEMA4D || Homo sapiens sema domain, immunoglobulin domain (Ig), transmembrane domain (TM) and short cytoplasmic domain, (semaphorin) 4D (SEMA4D), transcript variant 1, mRNA [NM_006378]	0.355459	5.88923
NM_000963	PTGS2	NM_000963 || PTGS2 || Homo sapiens prostaglandin-endoperoxide synthase 2 (prostaglandin G/H synthase and cyclooxygenase) (PTGS2), mRNA [NM_000963]	0.354535	5.4425
ENST00000607314		ENST00000607314 || || Homo sapiens MSTP131 (MST131) mRNA, complete cds. [AF176921]	0.352726	4.99129
NM_002374	MAP2	NM_002374 || MAP2 || Homo sapiens microtubule-associated protein 2 (MAP2), transcript variant 1, mRNA [NM_002374]	0.346991	9.89917
NM_002612	PDK4	NM_002612 || PDK4 || Homo sapiens pyruvate dehydrogenase kinase, isozyme 4 (PDK4), mRNA [NM_002612]	0.342902	5.61912
NM_001034852	SMOC1	NM_001034852 || SMOC1 || Homo sapiens SPARC related modular calcium binding 1 (SMOC1), transcript variant 1, mRNA [NM_001034852]	0.314895	0
NM_130782	RGS18	NM_130782 || RGS18 || Homo sapiens regulator of G-protein signaling 18 (RGS18), mRNA [NM_130782]	0.313614	3.87836
NM_001657	AREG	NM_001657 || AREG || Homo sapiens amphiregulin (AREG), mRNA [NM_001657]	0.299861	3.87836
lnc-WDR60-3:2	lnc-WDR60-3	lnc-WDR60-3:2 || lnc-WDR60-3 || LNCipedia lincRNA (lnc-WDR60-3), lincRNA [lnc-WDR60-3:2]	0.276943	7.26238
NM_003991	EDNRB	NM_003991 || EDNRB || Homo sapiens endothelin receptor type B (EDNRB), transcript variant 2, mRNA [NM_003991]	0.26801	3.86176
NM_000492	CFTR	NM_000492 || CFTR || Homo sapiens cystic fibrosis transmembrane conductance regulator (ATP-binding cassette sub-family C, member 7) (CFTR), mRNA [NM_000492]	0.245558	5.88923

## Sheet: Gr-5D-V, non-toxic
NCBI RefSeq	Gene Symbol	NBCI RefSeq || Gene Symbol || Gene Description (total # of significant genes: 492; 304 up, 188 down)	Normalized Fold (Unlogged)	q-value (%)
NM_002507	NGFR	NM_002507 || NGFR || Homo sapiens nerve growth factor receptor (NGFR), mRNA [NM_002507]	4.26299	5.29462
NM_013372	GREM1	NM_013372 || GREM1 || Homo sapiens gremlin 1, DAN family BMP antagonist (GREM1), transcript variant 1, mRNA [NM_013372]	4.11233	5.09545
NM_004694	SLC16A6	NM_004694 || SLC16A6 || Homo sapiens solute carrier family 16, member 6 (SLC16A6), transcript variant 2, mRNA [NM_004694]	4.06339	5.4675
NM_001080850	CCDC30	NM_001080850 || CCDC30 || Homo sapiens coiled-coil domain containing 30 (CCDC30), mRNA [NM_001080850]	3.94412	4.374
NM_004102	FABP3	NM_004102 || FABP3 || Homo sapiens fatty acid binding protein 3, muscle and heart (FABP3), mRNA [NM_004102]	3.8394	4.2525
NM_152527	SLC16A14	NM_152527 || SLC16A14 || Homo sapiens solute carrier family 16, member 14 (SLC16A14), mRNA [NM_152527]	3.81823	8.22035
NM_032413	C15orf48	NM_032413 || C15orf48 || Homo sapiens chromosome 15 open reading frame 48 (C15orf48), transcript variant 2, mRNA [NM_032413]	3.62777	5.4675
NM_024875	SYNPO2L	NM_024875 || SYNPO2L || Homo sapiens synaptopodin 2-like (SYNPO2L), transcript variant 2, mRNA [NM_024875]	3.59133	5.23385
NM_001017963	HSP90AA1	NM_001017963 || HSP90AA1 || Homo sapiens heat shock protein 90kDa alpha (cytosolic), class A member 1 (HSP90AA1), transcript variant 1, mRNA [NM_001017963]	3.17047	7.24228
NM_001740	CALB2	NM_001740 || CALB2 || Homo sapiens calbindin 2 (CALB2), transcript variant CALB2, mRNA [NM_001740]	3.12637	4.20998
NM_194298	SLC16A9	NM_194298 || SLC16A9 || Homo sapiens solute carrier family 16, member 9 (SLC16A9), mRNA [NM_194298]	3.09118	7.52572
NM_000475	NR0B1	NM_000475 || NR0B1 || Homo sapiens nuclear receptor subfamily 0, group B, member 1 (NR0B1), mRNA [NM_000475]	3.06764	8.17925
NM_005348	HSP90AA1	NM_005348 || HSP90AA1 || Homo sapiens heat shock protein 90kDa alpha (cytosolic), class A member 1 (HSP90AA1), transcript variant 2, mRNA [NM_005348]	3.0612	7.42878
NM_000804	FOLR3	NM_000804 || FOLR3 || Homo sapiens folate receptor 3 (gamma) (FOLR3), mRNA [NM_000804]	3.02617	7.33527
lnc-NRIP2-2:1	lnc-NRIP2-2	lnc-NRIP2-2:1 || lnc-NRIP2-2 || LNCipedia lincRNA (lnc-NRIP2-2), lincRNA [lnc-NRIP2-2:1]	3.00804	9.89183
NM_005346	HSPA1B	NM_005346 || HSPA1B || Homo sapiens heat shock 70kDa protein 1B (HSPA1B), mRNA [NM_005346]	2.99823	5.21721
M30627	HSP90AA2P	M30627 || HSP90AA2P || Human heat shock protein 86 mRNA, 5'end. [M30627]	2.92713	7.49346
NM_014278	HSPA4L	NM_014278 || HSPA4L || Homo sapiens heat shock 70kDa protein 4-like (HSPA4L), mRNA [NM_014278]	2.8139	6.93502
ENST00000550766	CRADD	ENST00000550766 || CRADD || CASP2 and RIPK1 domain containing adaptor with death domain [Source:HGNC Symbol;Acc:HGNC:2340] [ENST00000550766]	2.79805	8.44455
lnc-HK2-1:1	lnc-HK2-1	lnc-HK2-1:1 || lnc-HK2-1 || LNCipedia lincRNA (lnc-HK2-1), lincRNA [lnc-HK2-1:1]	2.77175	5.07782
NR_110429	LINC01540	NR_110429 || LINC01540 || Homo sapiens long intergenic non-protein coding RNA 1540 (LINC01540), transcript variant 1, long non-coding RNA [NR_110429]	2.7555	5.15207
NM_032726	PLCD4	NM_032726 || PLCD4 || Homo sapiens phospholipase C, delta 4 (PLCD4), mRNA [NM_032726]	2.74592	8.17925
ENST00000453951	LINC01293	ENST00000453951 || LINC01293 || long intergenic non-protein coding RNA 1293 [Source:HGNC Symbol;Acc:HGNC:50362] [ENST00000453951]	2.7029	5.63318
NM_005345	HSPA1A	NM_005345 || HSPA1A || Homo sapiens heat shock 70kDa protein 1A (HSPA1A), mRNA [NM_005345]	2.63982	5.43684
ENST00000412797		ENST00000412797 || || PREDICTED: Homo sapiens low density lipoprotein receptor adaptor protein 1 (LDLRAP1), transcript variant X3, mRNA [XM_006710560]	2.59661	5.184
NM_001114133	SYNPO2L	NM_001114133 || SYNPO2L || Homo sapiens synaptopodin 2-like (SYNPO2L), transcript variant 1, mRNA [NM_001114133]	2.54222	5.32081
NM_002575	SERPINB2	NM_002575 || SERPINB2 || Homo sapiens serpin peptidase inhibitor, clade B (ovalbumin), member 2 (SERPINB2), transcript variant 2, mRNA [NM_002575]	2.4629	3.8757
NM_007030	TPPP	NM_007030 || TPPP || Homo sapiens tubulin polymerization promoting protein (TPPP), mRNA [NM_007030]	2.40693	7.32409
NM_003485	GPR68	NM_003485 || GPR68 || Homo sapiens G protein-coupled receptor 68 (GPR68), transcript variant 2, mRNA [NM_003485]	2.38742	5.27189
NM_001033081	MYCL	NM_001033081 || MYCL || Homo sapiens v-myc avian myelocytomatosis viral oncogene lung carcinoma derived homolog (MYCL), transcript variant 1, mRNA [NM_001033081]	2.37339	6.20157
NR_024376	FAM225B	NR_024376 || FAM225B || Homo sapiens family with sequence similarity 225, member B (non-protein coding) (FAM225B), long non-coding RNA [NR_024376]	2.37009	9.31914
NM_007256	SLCO2B1	NM_007256 || SLCO2B1 || Homo sapiens solute carrier organic anion transporter family, member 2B1 (SLCO2B1), transcript variant 1, mRNA [NM_007256]	2.36435	6.68641
ENST00000576365		ENST00000576365 || || PREDICTED: Homo sapiens lysophosphatidylcholine acyltransferase 2 (LPCAT2), transcript variant X1, mRNA [XM_005256006]	2.35104	5.78088
NR_110428	LINC01540	NR_110428 || LINC01540 || Homo sapiens long intergenic non-protein coding RNA 1540 (LINC01540), transcript variant 2, long non-coding RNA [NR_110428]	2.35031	5.57859
NM_002157	HSPE1	NM_002157 || HSPE1 || Homo sapiens heat shock 10kDa protein 1 (HSPE1), mRNA [NM_002157]	2.34483	6.02246
NM_006644	HSPH1	NM_006644 || HSPH1 || Homo sapiens heat shock 105kDa/110kDa protein 1 (HSPH1), transcript variant 1, mRNA [NM_006644]	2.32648	7.43812
ENST00000463841	HSPE1	ENST00000463841 || HSPE1 || heat shock 10kDa protein 1 [Source:HGNC Symbol;Acc:HGNC:5269] [ENST00000463841]	2.27628	6.09912
ENST00000418546		ENST00000418546 || || microRNA 29b-1 [Source:HGNC Symbol;Acc:HGNC:31619] [ENST00000418546]	2.27331	8.74194
NM_001252102	KIF21B	NM_001252102 || KIF21B || Homo sapiens kinesin family member 21B (KIF21B), transcript variant 3, mRNA [NM_001252102]	2.26212	5.22223
ENST00000415536	LOC102723946	ENST00000415536 || LOC102723946 || ZN695_HUMAN (Q8IW36) Zinc finger protein 695 (Zinc finger protein SBZF3), partial (8%) [THC2641926]	2.25286	5.07746
NM_004172	SLC1A3	NM_004172 || SLC1A3 || Homo sapiens solute carrier family 1 (glial high affinity glutamate transporter), member 3 (SLC1A3), transcript variant GLAST, mRNA [NM_004172]	2.23403	7.7571
NM_020428	SLC44A2	NM_020428 || SLC44A2 || Homo sapiens solute carrier family 44 (choline transporter), member 2 (SLC44A2), transcript variant 1, mRNA [NM_020428]	2.23365	7.42878
lnc-ARHGAP26-4:5	lnc-ARHGAP26-4	lnc-ARHGAP26-4:5 || lnc-ARHGAP26-4 || DKFZp781J0760_r1 781 (synonym: hlcc4) Homo sapiens cDNA clone DKFZp781J0760 5', mRNA sequence [BX646148]	2.21767	9.31914
ENST00000440046		ENST00000440046 || || heat shock 10kDa protein 1 pseudogene 9 [Source:HGNC Symbol;Acc:HGNC:49328] [ENST00000440046]	2.21021	5.85955
NM_000433	NCF2	NM_000433 || NCF2 || Homo sapiens neutrophil cytosolic factor 2 (NCF2), transcript variant 1, mRNA [NM_000433]	2.1601	8.22035
NM_018112	TMEM38B	NM_018112 || TMEM38B || Homo sapiens transmembrane protein 38B (TMEM38B), mRNA [NM_018112]	2.15344	5.22223
NM_033143	FGF5	NM_033143 || FGF5 || Homo sapiens fibroblast growth factor 5 (FGF5), transcript variant 2, mRNA [NM_033143]	2.14449	6.02246
BC013592	DDIT4L	BC013592 || DDIT4L || Homo sapiens DNA-damage-inducible transcript 4-like, mRNA (cDNA clone MGC:9960 IMAGE:3877854), complete cds. [BC013592]	2.14101	8.01557
NR_033752	LOC344887	NR_033752 || LOC344887 || Homo sapiens NmrA-like family domain containing 1 pseudogene (LOC344887), non-coding RNA [NR_033752]	2.13731	7.81449
ENST00000563695		ENST00000563695 || || Homo sapiens cDNA clone IMAGE:4605966, partial cds. [BC071777]	2.13617	7.54743
NM_033100	CDHR1	NM_033100 || CDHR1 || Homo sapiens cadherin-related family member 1 (CDHR1), transcript variant 1, mRNA [NM_033100]	2.13417	0
NM_001159491	BRI3	NM_001159491 || BRI3 || Homo sapiens brain protein I3 (BRI3), transcript variant 2, mRNA [NM_001159491]	2.11268	5.23385
ENST00000456856		ENST00000456856 || || heat shock 10kDa protein 1 pseudogene 22 [Source:HGNC Symbol;Acc:HGNC:49341] [ENST00000456856]	2.10648	7.49605
NR_125792	LINC01291	NR_125792 || LINC01291 || Homo sapiens long intergenic non-protein coding RNA 1291 (LINC01291), long non-coding RNA [NR_125792]	2.10529	5.48847
NM_001205288	LIMS3L	NM_001205288 || LIMS3L || Homo sapiens LIM and senescent cell antigen-like domains 3-like (LIMS3L), transcript variant 1, mRNA [NM_001205288]	2.09529	5.20757
NM_003483	HMGA2	NM_003483 || HMGA2 || Homo sapiens high mobility group AT-hook 2 (HMGA2), transcript variant 1, mRNA [NM_003483]	2.08741	5.78538
lnc-MGST1-2:1	lnc-MGST1-2	lnc-MGST1-2:1 || lnc-MGST1-2 || LNCipedia lincRNA (lnc-MGST1-2), lincRNA [lnc-MGST1-2:1]	2.06684	9.89183
NM_138420	AHNAK2	NM_138420 || AHNAK2 || Homo sapiens AHNAK nucleoprotein 2 (AHNAK2), mRNA [NM_138420]	2.05939	7.42878
NM_001218	CA12	NM_001218 || CA12 || Homo sapiens carbonic anhydrase XII (CA12), transcript variant 1, mRNA [NM_001218]	2.0503	5.65098
NM_020152	MAP3K7CL	NM_020152 || MAP3K7CL || Homo sapiens MAP3K7 C-terminal like (MAP3K7CL), transcript variant 1, mRNA [NM_020152]	2.03058	5.65098
TCONS_l2_00014790	XLOC_l2_008203	TCONS_l2_00014790 || XLOC_l2_008203 || BROAD Institute lincRNA (XLOC_l2_008203), lincRNA [TCONS_l2_00014790]	2.0287	5.26439
ENST00000440200		ENST00000440200 || || Unknown	2.02596	8.78289
NM_018342	TMEM144	NM_018342 || TMEM144 || Homo sapiens transmembrane protein 144 (TMEM144), mRNA [NM_018342]	2.00319	5.27189
lnc-DBX1-1:1	lnc-DBX1-1	lnc-DBX1-1:1 || lnc-DBX1-1 || LNCipedia lincRNA (lnc-DBX1-1), lincRNA [lnc-DBX1-1:1]	2.00108	8.74194
NM_002251	KCNS1	NM_002251 || KCNS1 || Homo sapiens potassium voltage-gated channel, modifier subfamily S, member 1 (KCNS1), mRNA [NM_002251]	1.99422	5.21721
lnc-ROPN1L-2:1	lnc-ROPN1L-2	lnc-ROPN1L-2:1 || lnc-ROPN1L-2 || LNCipedia lincRNA (lnc-ROPN1L-2), lincRNA [lnc-ROPN1L-2:1]	1.99358	6.20157
NM_002156	HSPD1	NM_002156 || HSPD1 || Homo sapiens heat shock 60kDa protein 1 (chaperonin) (HSPD1), transcript variant 1, mRNA [NM_002156]	1.99185	6.77785
AK090863	FLJ33544	AK090863 || FLJ33544 || Homo sapiens cDNA FLJ33544 fis, clone BRAMY2008333. [AK090863]	1.98446	5.58141
NM_030824	ZNF442	NM_030824 || ZNF442 || Homo sapiens zinc finger protein 442 (ZNF442), mRNA [NM_030824]	1.96404	6.58362
NM_001611	ACP5	NM_001611 || ACP5 || Homo sapiens acid phosphatase 5, tartrate resistant (ACP5), transcript variant 4, mRNA [NM_001611]	1.94683	0
NM_002014	FKBP4	NM_002014 || FKBP4 || Homo sapiens FK506 binding protein 4, 59kDa (FKBP4), mRNA [NM_002014]	1.94006	9.58292
ENST00000554369	SNHG23	ENST00000554369 || SNHG23 || small nucleolar RNA host gene 23 (non-protein coding) [Source:HGNC Symbol;Acc:HGNC:50622] [ENST00000554369]	1.92823	5.14939
ENST00000505053		ENST00000505053 || || Unknown	1.92292	7.49605
AI830629		AI830629 || || wj10a11.x1 NCI_CGAP_Kid12 Homo sapiens cDNA clone IMAGE:2402396 3', mRNA sequence [AI830629]	1.91689	5.29462
ENST00000548488		ENST00000548488 || || Homo sapiens mRNA; cDNA DKFZp564C1964 (from clone DKFZp564C1964). [AL137575]	1.91236	5.48847
NM_001005340	GPNMB	NM_001005340 || GPNMB || Homo sapiens glycoprotein (transmembrane) nmb (GPNMB), transcript variant 1, mRNA [NM_001005340]	1.91209	4.2525
NM_033053	DMRTC1	NM_033053 || DMRTC1 || Homo sapiens DMRT-like family C1 (DMRTC1), mRNA [NM_033053]	1.90427	7.36144
ENST00000606227		ENST00000606227 || || PREDICTED: Homo sapiens LYR motif containing 4 (LYRM4), transcript variant X4, mRNA [XM_006715151]	1.8976	3.7339
TCONS_l2_00022656	XLOC_l2_011870	TCONS_l2_00022656 || XLOC_l2_011870 || BROAD Institute lincRNA (XLOC_l2_011870), lincRNA [TCONS_l2_00022656]	1.89681	8.17925
NM_001080404	ZNF878	NM_001080404 || ZNF878 || Homo sapiens zinc finger protein 878 (ZNF878), mRNA [NM_001080404]	1.89216	8.90776
XM_006722596	ZNF730	XM_006722596 || ZNF730 || PREDICTED: Homo sapiens zinc finger protein 730 (ZNF730), transcript variant X1, mRNA [XM_006722596]	1.88862	9.71831
NM_145244	DDIT4L	NM_145244 || DDIT4L || Homo sapiens DNA-damage-inducible transcript 4-like (DDIT4L), mRNA [NM_145244]	1.88764	5.54936
NM_025130	HKDC1	NM_025130 || HKDC1 || Homo sapiens hexokinase domain containing 1 (HKDC1), mRNA [NM_025130]	1.88571	8.17925
NM_002619	PF4	NM_002619 || PF4 || Homo sapiens platelet factor 4 (PF4), mRNA [NM_002619]	1.88389	4.62635
NM_001080441	TTC36	NM_001080441 || TTC36 || Homo sapiens tetratricopeptide repeat domain 36 (TTC36), mRNA [NM_001080441]	1.88145	8.74194
NM_003400	XPO1	NM_003400 || XPO1 || Homo sapiens exportin 1 (XPO1), mRNA [NM_003400]	1.87802	7.55084
NM_001492	GDF1	NM_001492 || GDF1 || Homo sapiens growth differentiation factor 1 (GDF1), mRNA [NM_001492]	1.87542	5.18531
NM_001164460	STEAP1B	NM_001164460 || STEAP1B || Homo sapiens STEAP family member 1B (STEAP1B), transcript variant 1, mRNA [NM_001164460]	1.87254	6.58362
lnc-HPCAL1-1:6	lnc-HPCAL1-1	lnc-HPCAL1-1:6 || lnc-HPCAL1-1 || Homo sapiens cDNA clone IMAGE:7501601. [BC111372]	1.86532	5.78538
NM_014412	CACYBP	NM_014412 || CACYBP || Homo sapiens calcyclin binding protein (CACYBP), transcript variant 1, mRNA [NM_014412]	1.86147	7.7571
ENST00000555069	ERO1L	ENST00000555069 || ERO1L || ERO1-like (S. cerevisiae) [Source:HGNC Symbol;Acc:HGNC:13280] [ENST00000555069]	1.85797	5.07782
NM_004833	AIM2	NM_004833 || AIM2 || Homo sapiens absent in melanoma 2 (AIM2), mRNA [NM_004833]	1.85756	7.54743
NM_174936	PCSK9	NM_174936 || PCSK9 || Homo sapiens proprotein convertase subtilisin/kexin type 9 (PCSK9), transcript variant 1, mRNA [NM_174936]	1.85485	5.78538
NM_001885	CRYAB	NM_001885 || CRYAB || Homo sapiens crystallin, alpha B (CRYAB), transcript variant 1, mRNA [NM_001885]	1.85222	8.01557
THC2685060		THC2685060 || || Unknown	1.84863	5.54936
ENST00000454614		ENST00000454614 || || cathepsin L pseudogene 4 [Source:HGNC Symbol;Acc:HGNC:23645] [ENST00000454614]	1.84131	5.48847
ENST00000511127		ENST00000511127 || || heat shock 60kDa protein 1 (chaperonin) pseudogene 5 [Source:HGNC Symbol;Acc:HGNC:5266] [ENST00000511127]	1.83824	7.54743
NM_001172631	TECPR2	NM_001172631 || TECPR2 || Homo sapiens tectonin beta-propeller repeat containing 2 (TECPR2), transcript variant 2, mRNA [NM_001172631]	1.82792	9.58292
NM_001080411	ZNF433	NM_001080411 || ZNF433 || Homo sapiens zinc finger protein 433 (ZNF433), mRNA [NM_001080411]	1.82298	9.89183
lnc-FOXL1-2:3	lnc-FOXL1-2	lnc-FOXL1-2:3 || lnc-FOXL1-2 || LNCipedia lincRNA (lnc-FOXL1-2), lincRNA [lnc-FOXL1-2:3]	1.82217	8.74194
NM_005127	CLEC2B	NM_005127 || CLEC2B || Homo sapiens C-type lectin domain family 2, member B (CLEC2B), mRNA [NM_005127]	1.82021	6.09912
NM_001282431	ARL4C	NM_001282431 || ARL4C || Homo sapiens ADP-ribosylation factor-like 4C (ARL4C), transcript variant 1, mRNA [NM_001282431]	1.81848	5.23257
NR_033405	CTSLP8	NR_033405 || CTSLP8 || Homo sapiens cathepsin L pseudogene 8 (CTSLP8), non-coding RNA [NR_033405]	1.81418	5.90285
NM_177478	FTMT	NM_177478 || FTMT || Homo sapiens ferritin mitochondrial (FTMT), mRNA [NM_177478]	1.79952	5.58141
NR_034147	APCDD1L-AS1	NR_034147 || APCDD1L-AS1 || Homo sapiens APCDD1L antisense RNA 1 (head to head) (APCDD1L-AS1), long non-coding RNA [NR_034147]	1.79833	7.49346
NM_001912	CTSL	NM_001912 || CTSL || Homo sapiens cathepsin L (CTSL), transcript variant 1, mRNA [NM_001912]	1.79695	6.33129
ENST00000374313	PTGR1	ENST00000374313 || PTGR1 || prostaglandin reductase 1 [Source:HGNC Symbol;Acc:HGNC:18429] [ENST00000374313]	1.79451	7.52572
lnc-GDF5-1:2	lnc-GDF5-1	lnc-GDF5-1:2 || lnc-GDF5-1 || LNCipedia lincRNA (lnc-GDF5-1), lincRNA [lnc-GDF5-1:2]	1.79295	7.49783
NM_001165967	HES7	NM_001165967 || HES7 || Homo sapiens hes family bHLH transcription factor 7 (HES7), transcript variant 1, mRNA [NM_001165967]	1.7826	9.31914
NM_017636	TRPM4	NM_017636 || TRPM4 || Homo sapiens transient receptor potential cation channel, subfamily M, member 4 (TRPM4), transcript variant 1, mRNA [NM_017636]	1.78003	9.02512
NM_174958	ATP2A3	NM_174958 || ATP2A3 || Homo sapiens ATPase, Ca++ transporting, ubiquitous (ATP2A3), transcript variant 7, mRNA [NM_174958]	1.7795	7.54743
NM_001085430	C17orf67	NM_001085430 || C17orf67 || Homo sapiens chromosome 17 open reading frame 67 (C17orf67), mRNA [NM_001085430]	1.77479	5.24281
NM_000158	GBE1	NM_000158 || GBE1 || Homo sapiens glucan (1,4-alpha-), branching enzyme 1 (GBE1), mRNA [NM_000158]	1.77035	6.20157
A_33_P3280355		A_33_P3280355 || unmapped	1.76911	8.08508
NM_016614	TDP2	NM_016614 || TDP2 || Homo sapiens tyrosyl-DNA phosphodiesterase 2 (TDP2), mRNA [NM_016614]	1.76815	5.22223
NM_182527	CABP7	NM_182527 || CABP7 || Homo sapiens calcium binding protein 7 (CABP7), mRNA [NM_182527]	1.76777	7.49605
NM_001001413	GOLGA6L1	NM_001001413 || GOLGA6L1 || Homo sapiens golgin A6 family-like 1 (GOLGA6L1), mRNA [NM_001001413]	1.76678	9.31914
NM_001286617	MAP3K7CL	NM_001286617 || MAP3K7CL || Homo sapiens MAP3K7 C-terminal like (MAP3K7CL), transcript variant 3, mRNA [NM_001286617]	1.76063	8.78289
NM_020299	AKR1B10	NM_020299 || AKR1B10 || Homo sapiens aldo-keto reductase family 1, member B10 (aldose reductase) (AKR1B10), mRNA [NM_020299]	1.76016	8.74194
NM_001103161	SH2D5	NM_001103161 || SH2D5 || Homo sapiens SH2 domain containing 5 (SH2D5), transcript variant 1, mRNA [NM_001103161]	1.76014	5.78981
NM_001144058	NTM	NM_001144058 || NTM || Homo sapiens neurotrimin (NTM), transcript variant 3, mRNA [NM_001144058]	1.75995	8.44455
NM_001205019	GK	NM_001205019 || GK || Homo sapiens glycerol kinase (GK), transcript variant 4, mRNA [NM_001205019]	1.75657	9.71831
NR_110515	LOC100506271	NR_110515 || LOC100506271 || Homo sapiens uncharacterized LOC100506271 (LOC100506271), long non-coding RNA [NR_110515]	1.75468	4.99764
NM_001165252	KRTAP2-3	NM_001165252 || KRTAP2-3 || Homo sapiens keratin associated protein 2-3 (KRTAP2-3), mRNA [NM_001165252]	1.75291	5.19413
lnc-GPR137C-1:1	lnc-GPR137C-1	lnc-GPR137C-1:1 || lnc-GPR137C-1 || LNCipedia lincRNA (lnc-GPR137C-1), lincRNA [lnc-GPR137C-1:1]	1.75275	5.09545
NM_138340	ABHD3	NM_138340 || ABHD3 || Homo sapiens abhydrolase domain containing 3 (ABHD3), mRNA [NM_138340]	1.74646	5.78981
ENST00000388967		ENST00000388967 || || heat shock 60kDa protein 1 (chaperonin) pseudogene 6 [Source:HGNC Symbol;Acc:HGNC:5267] [ENST00000388967]	1.74631	8.08508
NM_002910	RENBP	NM_002910 || RENBP || Homo sapiens renin binding protein (RENBP), mRNA [NM_002910]	1.74511	7.52572
NM_001301009	VSTM2A	NM_001301009 || VSTM2A || Homo sapiens V-set and transmembrane domain containing 2A (VSTM2A), transcript variant 2, mRNA [NM_001301009]	1.74012	5.49892
NM_001252065	SYT7	NM_001252065 || SYT7 || Homo sapiens synaptotagmin VII (SYT7), transcript variant 1, mRNA [NM_001252065]	1.73482	6.68641
NM_002458	MUC5B	NM_002458 || MUC5B || Homo sapiens mucin 5B, oligomeric mucus/gel-forming (MUC5B), mRNA [NM_002458]	1.72995	7.49605
lnc-SAA2-2:1	lnc-SAA2-2	lnc-SAA2-2:1 || lnc-SAA2-2 || LNCipedia lincRNA (lnc-SAA2-2), lincRNA [lnc-SAA2-2:1]	1.7292	9.09824
NM_006096	NDRG1	NM_006096 || NDRG1 || Homo sapiens N-myc downstream regulated 1 (NDRG1), transcript variant 2, mRNA [NM_006096]	1.72772	5.1463
NM_021570	BARX1	NM_021570 || BARX1 || Homo sapiens BARX homeobox 1 (BARX1), mRNA [NM_021570]	1.72564	5.09545
lnc-MTERFD3-1:1	lnc-MTERFD3-1	lnc-MTERFD3-1:1 || lnc-MTERFD3-1 || Homo sapiens cDNA FLJ31150 fis, clone IMR322001534. [AK055712]	1.72118	8.63617
NM_005450	NOG	NM_005450 || NOG || Homo sapiens noggin (NOG), mRNA [NM_005450]	1.71807	5.27377
NM_017549	EPDR1	NM_017549 || EPDR1 || Homo sapiens ependymin related 1 (EPDR1), transcript variant 1, mRNA [NM_017549]	1.71541	5.78981
ENST00000453935		ENST00000453935 || || Unknown	1.71521	5.13186
ENST00000539116		ENST00000539116 || || Unknown	1.71349	8.78289
ENST00000526041		ENST00000526041 || || HUM139E05B Human fetal brain (TFujiwara) Homo sapiens cDNA clone GEN-139E05 5', mRNA sequence [D81231]	1.71326	7.32409
NM_033300	LRP8	NM_033300 || LRP8 || Homo sapiens low density lipoprotein receptor-related protein 8, apolipoprotein e receptor (LRP8), transcript variant 2, mRNA [NM_033300]	1.70997	5.09704
lnc-RP11-17M16.1.1-1:1	lnc-RP11-17M16.1.1-1	lnc-RP11-17M16.1.1-1:1 || lnc-RP11-17M16.1.1-1 || PREDICTED: Homo sapiens uncharacterized LOC101927989 (LOC101927989), mRNA [XM_006722594]	1.70809	8.17925
NM_173555	TYSND1	NM_173555 || TYSND1 || Homo sapiens trypsin domain containing 1 (TYSND1), transcript variant 1, mRNA [NM_173555]	1.70345	8.78289
XR_425104	LOC102723817	XR_425104 || LOC102723817 || PREDICTED: Homo sapiens uncharacterized LOC102723817 (LOC102723817), ncRNA [XR_425104]	1.70271	7.55084
NM_004163	RAB27B	NM_004163 || RAB27B || Homo sapiens RAB27B, member RAS oncogene family (RAB27B), mRNA [NM_004163]	1.69803	5.14939
NM_178434	LCE3C	NM_178434 || LCE3C || Homo sapiens late cornified envelope 3C (LCE3C), mRNA [NM_178434]	1.69533	9.31914
NM_198207	CERS1	NM_198207 || CERS1 || Homo sapiens ceramide synthase 1 (CERS1), transcript variant 2, mRNA [NM_198207]	1.69478	0
NM_001287428	UPP1	NM_001287428 || UPP1 || Homo sapiens uridine phosphorylase 1 (UPP1), transcript variant 4, mRNA [NM_001287428]	1.69369	5.21578
NM_001282468	GOLGA8M	NM_001282468 || GOLGA8M || Homo sapiens golgin A8 family, member M (GOLGA8M), mRNA [NM_001282468]	1.69123	6.20157
ENST00000432249		ENST00000432249 || || Unknown	1.69045	7.57234
NM_001423	EMP1	NM_001423 || EMP1 || Homo sapiens epithelial membrane protein 1 (EMP1), mRNA [NM_001423]	1.68893	5.78088
NM_012449	STEAP1	NM_012449 || STEAP1 || Homo sapiens six transmembrane epithelial antigen of the prostate 1 (STEAP1), mRNA [NM_012449]	1.68583	8.74194
NM_000029	AGT	NM_000029 || AGT || Homo sapiens angiotensinogen (serpin peptidase inhibitor, clade A, member 8) (AGT), mRNA [NM_000029]	1.68353	5.32081
XR_109259	LOC100129781	XR_109259 || LOC100129781 || PREDICTED: Homo sapiens uncharacterized LOC100129781 (LOC100129781), transcript variant X2, ncRNA [XR_109259]	1.68342	9.71831
ENST00000380464	PLIN2	ENST00000380464 || PLIN2 || perilipin 2 [Source:HGNC Symbol;Acc:HGNC:248] [ENST00000380464]	1.68321	5.87829
NM_182981	OSGIN1	NM_182981 || OSGIN1 || Homo sapiens oxidative stress induced growth inhibitor 1 (OSGIN1), mRNA [NM_182981]	1.68269	9.02512
NM_182493	MYLK3	NM_182493 || MYLK3 || Homo sapiens myosin light chain kinase 3 (MYLK3), mRNA [NM_182493]	1.68118	6.68641
NM_144683	DHRS13	NM_144683 || DHRS13 || Homo sapiens dehydrogenase/reductase (SDR family) member 13 (DHRS13), mRNA [NM_144683]	1.67746	5.78538
NM_013305	ST8SIA5	NM_013305 || ST8SIA5 || Homo sapiens ST8 alpha-N-acetyl-neuraminide alpha-2,8-sialyltransferase 5 (ST8SIA5), mRNA [NM_013305]	1.67589	7.81449
A_33_P3346331		A_33_P3346331 || unmapped	1.67449	5.26141
BX445743		BX445743 || || BX445743 Homo sapiens T CELLS (JURKAT CELL LINE) Homo sapiens cDNA clone CS0DH002YB13 3-PRIME, mRNA sequence [BX445743]	1.67369	7.464
NR_037166	LOC100129518	NR_037166 || LOC100129518 || Homo sapiens uncharacterized LOC100129518 (LOC100129518), long non-coding RNA [NR_037166]	1.67369	5.55569
NM_002129	HMGB2	NM_002129 || HMGB2 || Homo sapiens high mobility group box 2 (HMGB2), transcript variant 1, mRNA [NM_002129]	1.67358	7.33527
NM_000100	CSTB	NM_000100 || CSTB || Homo sapiens cystatin B (stefin B) (CSTB), mRNA [NM_000100]	1.67187	5.23671
NM_006225	PLCD1	NM_006225 || PLCD1 || Homo sapiens phospholipase C, delta 1 (PLCD1), transcript variant 2, mRNA [NM_006225]	1.67135	7.57234
ENST00000506148		ENST00000506148 || || Unknown	1.66885	9.09824
ENST00000585503	JRK	ENST00000585503 || JRK || Jrk homolog (mouse) [Source:HGNC Symbol;Acc:HGNC:6199] [ENST00000585503]	1.66741	5.43684
NM_173039	AQP11	NM_173039 || AQP11 || Homo sapiens aquaporin 11 (AQP11), mRNA [NM_173039]	1.6636	5.48847
NM_001287426	UPP1	NM_001287426 || UPP1 || Homo sapiens uridine phosphorylase 1 (UPP1), transcript variant 3, mRNA [NM_001287426]	1.66232	3.645
lnc-SYN3-4:1	lnc-SYN3-4	lnc-SYN3-4:1 || lnc-SYN3-4 || DB024615 TESTI2 Homo sapiens cDNA clone TESTI2006189 5', mRNA sequence [DB024615]	1.65772	8.63617
NM_080725	SRXN1	NM_080725 || SRXN1 || Homo sapiens sulfiredoxin 1 (SRXN1), mRNA [NM_080725]	1.65723	7.42878
NM_003329	TXN	NM_003329 || TXN || Homo sapiens thioredoxin (TXN), transcript variant 1, mRNA [NM_003329]	1.6567	7.49346
ENST00000580776		ENST00000580776 || || Unknown	1.65663	7.33527
NM_001037537	PHYH	NM_001037537 || PHYH || Homo sapiens phytanoyl-CoA 2-hydroxylase (PHYH), transcript variant 2, mRNA [NM_001037537]	1.65429	5.48978
NM_001003927	EVI2A	NM_001003927 || EVI2A || Homo sapiens ecotropic viral integration site 2A (EVI2A), transcript variant 1, mRNA [NM_001003927]	1.6536	7.49783
NM_002610	PDK1	NM_002610 || PDK1 || Homo sapiens pyruvate dehydrogenase kinase, isozyme 1 (PDK1), transcript variant 2, mRNA [NM_002610]	1.65303	6.58362
NM_005559	LAMA1	NM_005559 || LAMA1 || Homo sapiens laminin, alpha 1 (LAMA1), mRNA [NM_005559]	1.65018	5.29462
NM_006516	SLC2A1	NM_006516 || SLC2A1 || Homo sapiens solute carrier family 2 (facilitated glucose transporter), member 1 (SLC2A1), mRNA [NM_006516]	1.65005	5.23661
NM_032873	UBASH3B	NM_032873 || UBASH3B || Homo sapiens ubiquitin associated and SH3 domain containing B (UBASH3B), mRNA [NM_032873]	1.64963	5.90285
NM_003636	KCNAB2	NM_003636 || KCNAB2 || Homo sapiens potassium channel, voltage gated subfamily A regulatory beta subunit 2 (KCNAB2), transcript variant 1, mRNA [NM_003636]	1.6484	8.44455
NM_016246	HSD17B14	NM_016246 || HSD17B14 || Homo sapiens hydroxysteroid (17-beta) dehydrogenase 14 (HSD17B14), mRNA [NM_016246]	1.64371	5.3528
ENST00000520549	IRGM	ENST00000520549 || IRGM || immunity-related GTPase family, M [Source:HGNC Symbol;Acc:HGNC:29597] [ENST00000520549]	1.64236	4.99428
NM_018249	CDK5RAP2	NM_018249 || CDK5RAP2 || Homo sapiens CDK5 regulatory subunit associated protein 2 (CDK5RAP2), transcript variant 1, mRNA [NM_018249]	1.64142	9.71831
NM_032553	GPR174	NM_032553 || GPR174 || Homo sapiens G protein-coupled receptor 174 (GPR174), mRNA [NM_032553]	1.63692	6.02246
NR_108081	LINC01176	NR_108081 || LINC01176 || Homo sapiens long intergenic non-protein coding RNA 1176 (LINC01176), long non-coding RNA [NR_108081]	1.63536	5.85565
ENST00000451149		ENST00000451149 || || Unknown	1.63413	7.49605
NM_013402	FADS1	NM_013402 || FADS1 || Homo sapiens fatty acid desaturase 1 (FADS1), mRNA [NM_013402]	1.63391	4.98801
NM_024060	AHNAK	NM_024060 || AHNAK || Homo sapiens AHNAK nucleoprotein (AHNAK), transcript variant 2, mRNA [NM_024060]	1.62903	5.10024
NM_198277	SLC37A2	NM_198277 || SLC37A2 || Homo sapiens solute carrier family 37 (glucose-6-phosphate transporter), member 2 (SLC37A2), transcript variant 1, mRNA [NM_198277]	1.62879	5.10024
NM_001277313	FMN1	NM_001277313 || FMN1 || Homo sapiens formin 1 (FMN1), transcript variant 1, mRNA [NM_001277313]	1.62632	9.31914
lnc-MAFB-1:1	lnc-MAFB-1	lnc-MAFB-1:1 || lnc-MAFB-1 || LNCipedia lincRNA (lnc-MAFB-1), lincRNA [lnc-MAFB-1:1]	1.62317	7.36144
NM_001099280	MROH1	NM_001099280 || MROH1 || Homo sapiens maestro heat-like repeat family member 1 (MROH1), transcript variant 2, mRNA [NM_001099280]	1.62086	7.36144
NM_001661	ARL4D	NM_001661 || ARL4D || Homo sapiens ADP-ribosylation factor-like 4D (ARL4D), mRNA [NM_001661]	1.61897	9.02512
NM_207309	UAP1L1	NM_207309 || UAP1L1 || Homo sapiens UDP-N-acetylglucosamine pyrophosphorylase 1 like 1 (UAP1L1), mRNA [NM_207309]	1.61718	8.08508
TCONS_l2_00009502	XLOC_l2_004898	TCONS_l2_00009502 || XLOC_l2_004898 || BROAD Institute lincRNA (XLOC_l2_004898), lincRNA [TCONS_l2_00009502]	1.61623	4.54081
ENST00000494509		ENST00000494509 || || BX116500 NCI_CGAP_Kid8 Homo sapiens cDNA clone IMAGp998A015526, mRNA sequence [BX116500]	1.61325	6.58362
ENST00000602906		ENST00000602906 || || heat shock protein 90kDa alpha (cytosolic), class B member 2, pseudogene [Source:HGNC Symbol;Acc:HGNC:32537] [ENST00000602906]	1.61129	7.69798
NM_002252	KCNS3	NM_002252 || KCNS3 || Homo sapiens potassium voltage-gated channel, modifier subfamily S, member 3 (KCNS3), transcript variant 1, mRNA [NM_002252]	1.61037	9.02512
NM_002317	LOX	NM_002317 || LOX || Homo sapiens lysyl oxidase (LOX), transcript variant 1, mRNA [NM_002317]	1.61026	7.36144
ENST00000390622		ENST00000390622 || || immunoglobulin heavy variable 1-46 [Source:HGNC Symbol;Acc:HGNC:5554] [ENST00000390622]	1.60917	8.01557
TCONS_l2_00021296	XLOC_l2_011265	TCONS_l2_00021296 || XLOC_l2_011265 || BROAD Institute lincRNA (XLOC_l2_011265), lincRNA [TCONS_l2_00021296]	1.60619	6.09912
XR_251219	LOC101929947	XR_251219 || LOC101929947 || PREDICTED: Homo sapiens uncharacterized LOC101929947 (LOC101929947), transcript variant X3, ncRNA [XR_251219]	1.60399	5.162
lnc-KLF15-3:4	lnc-KLF15-3	lnc-KLF15-3:4 || lnc-KLF15-3 || LNCipedia lincRNA (lnc-KLF15-3), lincRNA [lnc-KLF15-3:4]	1.60385	5.21721
NM_006933	SLC5A3	NM_006933 || SLC5A3 || Homo sapiens solute carrier family 5 (sodium/myo-inositol cotransporter), member 3 (SLC5A3), mRNA [NM_006933]	1.60343	9.02512
ENST00000609220		ENST00000609220 || || MIR4435-1 host gene (non-protein coding) [Source:HGNC Symbol;Acc:HGNC:35163] [ENST00000609220]	1.60203	5.60015
AF116668		AF116668 || || Homo sapiens PRO1787 mRNA, complete cds. [AF116668]	1.60115	9.02512
NM_002421	MMP1	NM_002421 || MMP1 || Homo sapiens matrix metallopeptidase 1 (interstitial collagenase) (MMP1), transcript variant 1, mRNA [NM_002421]	1.60033	3.645
lnc-SLC25A32-2:1	lnc-SLC25A32-2	lnc-SLC25A32-2:1 || lnc-SLC25A32-2 || LNCipedia lincRNA (lnc-SLC25A32-2), lincRNA [lnc-SLC25A32-2:1]	1.60018	7.81449
lnc-SNRPD3-2:1	lnc-SNRPD3-2	lnc-SNRPD3-2:1 || lnc-SNRPD3-2 || LNCipedia lincRNA (lnc-SNRPD3-2), lincRNA [lnc-SNRPD3-2:1]	1.60007	7.51517
NM_015714	G0S2	NM_015714 || G0S2 || Homo sapiens G0/G1 switch 2 (G0S2), mRNA [NM_015714]	1.59901	5.87829
NM_005429	VEGFC	NM_005429 || VEGFC || Homo sapiens vascular endothelial growth factor C (VEGFC), mRNA [NM_005429]	1.59755	5.59837
NM_199280	FAM179A	NM_199280 || FAM179A || Homo sapiens family with sequence similarity 179, member A (FAM179A), mRNA [NM_199280]	1.5974	5.78981
ENST00000552324		ENST00000552324 || || Unknown	1.59534	7.32409
NM_018057	SLC6A15	NM_018057 || SLC6A15 || Homo sapiens solute carrier family 6 (neutral amino acid transporter), member 15 (SLC6A15), transcript variant 2, mRNA [NM_018057]	1.59514	5.02031
ENST00000442072		ENST00000442072 || || Unknown	1.5947	5.78538
ENST00000573465	LINC00514	ENST00000573465 || LINC00514 || long intergenic non-protein coding RNA 514 [Source:HGNC Symbol;Acc:HGNC:27549] [ENST00000573465]	1.59395	4.99764
NM_001145369	PTPN3	NM_001145369 || PTPN3 || Homo sapiens protein tyrosine phosphatase, non-receptor type 3 (PTPN3), transcript variant 3, mRNA [NM_001145369]	1.59328	4.99764
NM_176870	MT1M	NM_176870 || MT1M || Homo sapiens metallothionein 1M (MT1M), mRNA [NM_176870]	1.59275	5.33647
NM_015379	BRI3	NM_015379 || BRI3 || Homo sapiens brain protein I3 (BRI3), transcript variant 1, mRNA [NM_015379]	1.5919	5.09545
NM_000167	GK	NM_000167 || GK || Homo sapiens glycerol kinase (GK), transcript variant 2, mRNA [NM_000167]	1.58902	9.58292
ENST00000438850		ENST00000438850 || || DB069106 TESTI4 Homo sapiens cDNA clone TESTI4011248 5', mRNA sequence [DB069106]	1.58887	7.33527
lnc-OR51B4-3:1	lnc-OR51B4-3	lnc-OR51B4-3:1 || lnc-OR51B4-3 || Homo sapiens beta globin locus control region sequence. [AY195961]	1.58885	9.89183
NM_152793	MTURN	NM_152793 || MTURN || Homo sapiens maturin, neural progenitor differentiation regulator homolog (Xenopus) (MTURN), mRNA [NM_152793]	1.58855	8.17925
NR_027387	LINC01003	NR_027387 || LINC01003 || Homo sapiens long intergenic non-protein coding RNA 1003 (LINC01003), long non-coding RNA [NR_027387]	1.58661	5.48847
NM_005221	DLX5	NM_005221 || DLX5 || Homo sapiens distal-less homeobox 5 (DLX5), mRNA [NM_005221]	1.58633	7.24228
NM_001289	CLIC2	NM_001289 || CLIC2 || Homo sapiens chloride intracellular channel 2 (CLIC2), mRNA [NM_001289]	1.5857	9.71831
NM_001888	CRYM	NM_001888 || CRYM || Homo sapiens crystallin, mu (CRYM), mRNA [NM_001888]	1.58515	5.21721
NM_144606	FLCN	NM_144606 || FLCN || Homo sapiens folliculin (FLCN), transcript variant 2, mRNA [NM_144606]	1.58311	8.01557
NM_153756	FNDC5	NM_153756 || FNDC5 || Homo sapiens fibronectin type III domain containing 5 (FNDC5), transcript variant 2, mRNA [NM_153756]	1.58275	9.31914
NM_003248	THBS4	NM_003248 || THBS4 || Homo sapiens thrombospondin 4 (THBS4), mRNA [NM_003248]	1.5827	8.78289
TCONS_l2_00000881	XLOC_l2_000657	TCONS_l2_00000881 || XLOC_l2_000657 || BROAD Institute lincRNA (XLOC_l2_000657), lincRNA [TCONS_l2_00000881]	1.58198	7.43812
NR_026796	LINC00520	NR_026796 || LINC00520 || Homo sapiens long intergenic non-protein coding RNA 520 (LINC00520), transcript variant 1, long non-coding RNA [NR_026796]	1.58151	6.02246
NM_006036	PREPL	NM_006036 || PREPL || Homo sapiens prolyl endopeptidase-like (PREPL), transcript variant 1, mRNA [NM_006036]	1.58107	5.78538
NM_201525	GPR56	NM_201525 || GPR56 || Homo sapiens G protein-coupled receptor 56 (GPR56), transcript variant 3, mRNA [NM_201525]	1.57574	9.41156
NR_027049	ZNF788	NR_027049 || ZNF788 || Homo sapiens zinc finger family member 788 (ZNF788), non-coding RNA [NR_027049]	1.57498	5.45093
NM_017413	APLN	NM_017413 || APLN || Homo sapiens apelin (APLN), mRNA [NM_017413]	1.57374	5.87829
lnc-CHAF1B-2:1	lnc-CHAF1B-2	lnc-CHAF1B-2:1 || lnc-CHAF1B-2 || LNCipedia lincRNA (lnc-CHAF1B-2), lincRNA [lnc-CHAF1B-2:1]	1.57225	5.32081
NM_013262	MYLIP	NM_013262 || MYLIP || Homo sapiens myosin regulatory light chain interacting protein (MYLIP), mRNA [NM_013262]	1.57025	7.49605
NM_019891	ERO1LB	NM_019891 || ERO1LB || Homo sapiens ERO1-like beta (S. cerevisiae) (ERO1LB), mRNA [NM_019891]	1.57008	9.09824
NM_018941	CLN8	NM_018941 || CLN8 || Homo sapiens ceroid-lipofuscinosis, neuronal 8 (epilepsy, progressive with mental retardation) (CLN8), mRNA [NM_018941]	1.56924	5.29462
NM_000405	GM2A	NM_000405 || GM2A || Homo sapiens GM2 ganglioside activator (GM2A), transcript variant 1, mRNA [NM_000405]	1.56901	5.58141
lnc-EDEM3-2:1	lnc-EDEM3-2	lnc-EDEM3-2:1 || lnc-EDEM3-2 || LNCipedia lincRNA (lnc-EDEM3-2), lincRNA [lnc-EDEM3-2:1]	1.56811	7.54743
NM_006089	SCML2	NM_006089 || SCML2 || Homo sapiens sex comb on midleg-like 2 (Drosophila) (SCML2), transcript variant 1, mRNA [NM_006089]	1.56648	5.184
NM_175617	MT1E	NM_175617 || MT1E || Homo sapiens metallothionein 1E (MT1E), mRNA [NM_175617]	1.56396	5.02031
NM_004177	STX3	NM_004177 || STX3 || Homo sapiens syntaxin 3 (STX3), transcript variant 1, mRNA [NM_004177]	1.5631	5.04249
NM_001039585	PTGFR	NM_001039585 || PTGFR || Homo sapiens prostaglandin F receptor (FP) (PTGFR), transcript variant 2, mRNA [NM_001039585]	1.56054	6.20157
NR_002833	DPY19L2P1	NR_002833 || DPY19L2P1 || Homo sapiens DPY19L2 pseudogene 1 (DPY19L2P1), non-coding RNA [NR_002833]	1.55941	9.89183
NM_153217	TMEM174	NM_153217 || TMEM174 || Homo sapiens transmembrane protein 174 (TMEM174), mRNA [NM_153217]	1.55728	8.74194
NM_021226	ARHGAP22	NM_021226 || ARHGAP22 || Homo sapiens Rho GTPase activating protein 22 (ARHGAP22), transcript variant 3, mRNA [NM_021226]	1.55307	6.58362
NM_001256192	PDCD6IP	NM_001256192 || PDCD6IP || Homo sapiens programmed cell death 6 interacting protein (PDCD6IP), transcript variant 4, mRNA [NM_001256192]	1.5526	7.7571
NM_001114357	C4orf47	NM_001114357 || C4orf47 || Homo sapiens chromosome 4 open reading frame 47 (C4orf47), mRNA [NM_001114357]	1.55169	4.56229
NM_016270	KLF2	NM_016270 || KLF2 || Homo sapiens Kruppel-like factor 2 (KLF2), mRNA [NM_016270]	1.54968	8.22035
NM_001216	CA9	NM_001216 || CA9 || Homo sapiens carbonic anhydrase IX (CA9), mRNA [NM_001216]	1.54953	6.58362
NM_005946	MT1A	NM_005946 || MT1A || Homo sapiens metallothionein 1A (MT1A), mRNA [NM_005946]	1.5488	5.14939
lnc-LDLRAP1-1:2	lnc-LDLRAP1-1	lnc-LDLRAP1-1:2 || lnc-LDLRAP1-1 || PREDICTED: Homo sapiens low density lipoprotein receptor adaptor protein 1 (LDLRAP1), transcript variant X3, mRNA [XM_006710560]	1.54652	5.26439
NM_004049	BCL2A1	NM_004049 || BCL2A1 || Homo sapiens BCL2-related protein A1 (BCL2A1), transcript variant 1, mRNA [NM_004049]	1.54636	5.78538
ENST00000529607	LOC100506282	ENST00000529607 || LOC100506282 || Unknown	1.54205	5.85565
XR_171620	LOC100128374	XR_171620 || LOC100128374 || PREDICTED: Homo sapiens uncharacterized LOC100128374 (LOC100128374), misc_RNA [XR_171620]	1.54157	4.16829
ENST00000373159	TRAPPC3	ENST00000373159 || TRAPPC3 || trafficking protein particle complex 3 [Source:HGNC Symbol;Acc:HGNC:19942] [ENST00000373159]	1.54093	7.54743
NR_110114	LOC101927668	NR_110114 || LOC101927668 || Homo sapiens uncharacterized LOC101927668 (LOC101927668), long non-coding RNA [NR_110114]	1.54075	7.33527
NM_001975	ENO2	NM_001975 || ENO2 || Homo sapiens enolase 2 (gamma, neuronal) (ENO2), mRNA [NM_001975]	1.53673	6.20157
lnc-ARRDC4-4:1	lnc-ARRDC4-4	lnc-ARRDC4-4:1 || lnc-ARRDC4-4 || LNCipedia lincRNA (lnc-ARRDC4-4), lincRNA [lnc-ARRDC4-4:1]	1.53645	8.52041
NR_105019	TMEM161B-AS1	NR_105019 || TMEM161B-AS1 || Homo sapiens TMEM161B antisense RNA 1 (TMEM161B-AS1), transcript variant 4, long non-coding RNA [NR_105019]	1.5355	5.48847
NM_001198908	CCDC169	NM_001198908 || CCDC169 || Homo sapiens coiled-coil domain containing 169 (CCDC169), transcript variant 7, mRNA [NM_001198908]	1.53534	7.42878
lnc-DYNLL2-2:2	lnc-DYNLL2-2	lnc-DYNLL2-2:2 || lnc-DYNLL2-2 || Q21EL0_9ALTE (Q21EL0) Ham1-like protein, partial (6%) [THC2760428]	1.53483	7.32409
NM_000146	FTL	NM_000146 || FTL || Homo sapiens ferritin, light polypeptide (FTL), mRNA [NM_000146]	1.53446	8.78289
NM_006432	NPC2	NM_006432 || NPC2 || Homo sapiens Niemann-Pick disease, type C2 (NPC2), mRNA [NM_006432]	1.53409	4.56229
NM_017742	ZCCHC2	NM_017742 || ZCCHC2 || Homo sapiens zinc finger, CCHC domain containing 2 (ZCCHC2), transcript variant 1, mRNA [NM_017742]	1.53336	6.20157
NM_001206673	ABHD12B	NM_001206673 || ABHD12B || Homo sapiens abhydrolase domain containing 12B (ABHD12B), transcript variant 1, mRNA [NM_001206673]	1.53232	7.32409
lnc-NOTCH2-1:1	lnc-NOTCH2-1	lnc-NOTCH2-1:1 || lnc-NOTCH2-1 || Homo sapiens cDNA clone IMAGE:4359039, partial cds. [BC064338]	1.53058	8.44455
AK126781	LOC100130419	AK126781 || LOC100130419 || Homo sapiens cDNA FLJ44830 fis, clone BRACE3047018. [AK126781]	1.52816	8.01557
NR_001447	MT1L	NR_001447 || MT1L || Homo sapiens metallothionein 1L (gene/pseudogene) (MT1L), non-coding RNA [NR_001447]	1.52791	5.23671
NM_001136137	RPL28	NM_001136137 || RPL28 || Homo sapiens ribosomal protein L28 (RPL28), transcript variant 5, mRNA [NM_001136137]	1.52589	5.48978
ENST00000503009		ENST00000503009 || || BX117354 Soares_NFL_T_GBC_S1 Homo sapiens cDNA clone IMAGp998M104015, mRNA sequence [BX117354]	1.52458	7.7571
NM_012111	AHSA1	NM_012111 || AHSA1 || Homo sapiens AHA1, activator of heat shock 90kDa protein ATPase homolog 1 (yeast) (AHSA1), mRNA [NM_012111]	1.52368	7.42878
NM_007034	DNAJB4	NM_007034 || DNAJB4 || Homo sapiens DnaJ (Hsp40) homolog, subfamily B, member 4 (DNAJB4), mRNA [NM_007034]	1.52353	7.42878
TCONS_l2_00026416	XLOC_l2_013737	TCONS_l2_00026416 || XLOC_l2_013737 || BROAD Institute lincRNA (XLOC_l2_013737), lincRNA [TCONS_l2_00026416]	1.52179	8.52041
ENST00000495363		ENST00000495363 || || small integral membrane protein 11 [Source:HGNC Symbol;Acc:HGNC:1293] [ENST00000495363]	1.51985	7.06359
ENST00000501708	LOC102725477	ENST00000501708 || LOC102725477 || Homo sapiens cDNA FLJ43423 fis, clone OCBBF2026981, weakly similar to alpha 1C adrenergic receptor isoform 2. [AK125412]	1.5192	7.69798
NM_004997	MYBPH	NM_004997 || MYBPH || Homo sapiens myosin binding protein H (MYBPH), mRNA [NM_004997]	1.51734	5.184
ENST00000314232		ENST00000314232 || || zinc finger and BTB domain containing 12 pseudogene 1 [Source:HGNC Symbol;Acc:HGNC:37702] [ENST00000314232]	1.51733	7.464
ENST00000601437		ENST00000601437 || || KIAA1328 [Source:HGNC Symbol;Acc:HGNC:29248] [ENST00000601437]	1.51669	8.52041
lnc-F8A2-2:1	lnc-F8A2-2	lnc-F8A2-2:1 || lnc-F8A2-2 || Homo sapiens cDNA FLJ25895 fis, clone CBR03553. [AK098761]	1.51627	5.26439
ENST00000453166		ENST00000453166 || || immunoglobulin kappa variable 2D-28 [Source:HGNC Symbol;Acc:HGNC:5799] [ENST00000453166]	1.51611	8.22035
lnc-ITGB3BP-1:5	lnc-ITGB3BP-1	lnc-ITGB3BP-1:5 || lnc-ITGB3BP-1 || Homo sapiens FOXD3 antisense RNA 6, complete sequence. [KF925354]	1.5147	7.54743
NM_005947	MT1B	NM_005947 || MT1B || Homo sapiens metallothionein 1B (MT1B), mRNA [NM_005947]	1.5138	5.32081
NM_012337	CFAP45	NM_012337 || CFAP45 || Homo sapiens cilia and flagella associated protein 45 (CFAP45), mRNA [NM_012337]	1.51346	5.63318
lnc-MACC1-1:5	lnc-MACC1-1	lnc-MACC1-1:5 || lnc-MACC1-1 || LNCipedia lincRNA (lnc-MACC1-1), lincRNA [lnc-MACC1-1:5]	1.51321	5.57859
NM_000024	ADRB2	NM_000024 || ADRB2 || Homo sapiens adrenoceptor beta 2, surface (ADRB2), mRNA [NM_000024]	1.51298	7.52572
NM_018314	UEVLD	NM_018314 || UEVLD || Homo sapiens UEV and lactate/malate dehyrogenase domains (UEVLD), transcript variant 2, mRNA [NM_018314]	1.51233	7.55084
NM_000104	CYP1B1	NM_000104 || CYP1B1 || Homo sapiens cytochrome P450, family 1, subfamily B, polypeptide 1 (CYP1B1), mRNA [NM_000104]	1.51151	5.13186
ENST00000503942	UBE3D	ENST00000503942 || UBE3D || ubiquitin protein ligase E3D [Source:HGNC Symbol;Acc:HGNC:21381] [ENST00000503942]	1.50994	5.54936
NM_015444	TMEM158	NM_015444 || TMEM158 || Homo sapiens transmembrane protein 158 (gene/pseudogene) (TMEM158), mRNA [NM_015444]	1.50822	5.26247
NM_002224	ITPR3	NM_002224 || ITPR3 || Homo sapiens inositol 1,4,5-trisphosphate receptor, type 3 (ITPR3), mRNA [NM_002224]	1.5077	5.90285
ENST00000565356	PRMT7	ENST00000565356 || PRMT7 || protein arginine methyltransferase 7 [Source:HGNC Symbol;Acc:HGNC:25557] [ENST00000565356]	1.50722	7.49783
lnc-CPEB2-8:1	lnc-CPEB2-8	lnc-CPEB2-8:1 || lnc-CPEB2-8 || LNCipedia lincRNA (lnc-CPEB2-8), lincRNA [lnc-CPEB2-8:1]	1.50715	8.90776
NM_001290212	TSPAN10	NM_001290212 || TSPAN10 || Homo sapiens tetraspanin 10 (TSPAN10), transcript variant 1, mRNA [NM_001290212]	1.50684	7.49605
NM_000194	HPRT1	NM_000194 || HPRT1 || Homo sapiens hypoxanthine phosphoribosyltransferase 1 (HPRT1), mRNA [NM_000194]	1.50672	8.52041
NM_020771	HACE1	NM_020771 || HACE1 || Homo sapiens HECT domain and ankyrin repeat containing E3 ubiquitin protein ligase 1 (HACE1), transcript variant 1, mRNA [NM_020771]	1.50655	5.85565
NM_005689	ABCB6	NM_005689 || ABCB6 || Homo sapiens ATP-binding cassette, sub-family B (MDR/TAP), member 6 (Langereis blood group) (ABCB6), mRNA [NM_005689]	1.50625	8.17925
lnc-CSAG1-1:2	lnc-CSAG1-1	lnc-CSAG1-1:2 || lnc-CSAG1-1 || PREDICTED: Homo sapiens chondrosarcoma-associated gene 2/3 protein-like (LOC102723547), mRNA [XM_006724857]	1.50392	7.06359
NM_003719	PDE8B	NM_003719 || PDE8B || Homo sapiens phosphodiesterase 8B (PDE8B), transcript variant 1, mRNA [NM_003719]	1.50349	4.54081
ENST00000582878		ENST00000582878 || || BC020938 synaptophysin-like protein, isoform b {Homo sapiens} (exp=-1; wgp=0; cg=0), partial (15%) [THC2518646]	1.50263	8.01557
NM_006601	PTGES3	NM_006601 || PTGES3 || Homo sapiens prostaglandin E synthase 3 (cytosolic) (PTGES3), transcript variant 1, mRNA [NM_006601]	1.50071	7.15213
NM_181782	NCOA7	NM_181782 || NCOA7 || Homo sapiens nuclear receptor coactivator 7 (NCOA7), transcript variant 1, mRNA [NM_181782]	0.664311	5.07746
A_33_P3361217		A_33_P3361217 || unmapped	0.664049	7.81449
NM_002508	NID1	NM_002508 || NID1 || Homo sapiens nidogen 1 (NID1), mRNA [NM_002508]	0.664039	9.02512
NM_182762	MACC1	NM_182762 || MACC1 || Homo sapiens metastasis associated in colon cancer 1 (MACC1), mRNA [NM_182762]	0.661566	5.43684
NM_020433	JPH2	NM_020433 || JPH2 || Homo sapiens junctophilin 2 (JPH2), transcript variant 1, mRNA [NM_020433]	0.661257	8.74194
NM_001048166	STIL	NM_001048166 || STIL || Homo sapiens SCL/TAL1 interrupting locus (STIL), transcript variant 1, mRNA [NM_001048166]	0.660838	4.98801
NM_002658	PLAU	NM_002658 || PLAU || Homo sapiens plasminogen activator, urokinase (PLAU), transcript variant 1, mRNA [NM_002658]	0.659921	7.49783
NM_052860	ZNF300	NM_052860 || ZNF300 || Homo sapiens zinc finger protein 300 (ZNF300), transcript variant 2, mRNA [NM_052860]	0.659029	7.15213
ENST00000425880		ENST00000425880 || || myosin, heavy chain 16 pseudogene [Source:HGNC Symbol;Acc:HGNC:31038] [ENST00000425880]	0.658988	4.50265
NM_003521	HIST1H2BM	NM_003521 || HIST1H2BM || Homo sapiens histone cluster 1, H2bm (HIST1H2BM), mRNA [NM_003521]	0.658884	5.78088
NM_032446	MEGF10	NM_032446 || MEGF10 || Homo sapiens multiple EGF-like-domains 10 (MEGF10), transcript variant 1, mRNA [NM_032446]	0.658366	9.41156
NM_004089	TSC22D3	NM_004089 || TSC22D3 || Homo sapiens TSC22 domain family, member 3 (TSC22D3), transcript variant 2, mRNA [NM_004089]	0.657691	9.89183
NM_004557	NOTCH4	NM_004557 || NOTCH4 || Homo sapiens notch 4 (NOTCH4), mRNA [NM_004557]	0.655207	4.34915
NM_000667	ADH1A	NM_000667 || ADH1A || Homo sapiens alcohol dehydrogenase 1A (class I), alpha polypeptide (ADH1A), mRNA [NM_000667]	0.653927	8.17925
NM_001034	RRM2	NM_001034 || RRM2 || Homo sapiens ribonucleotide reductase M2 (RRM2), transcript variant 2, mRNA [NM_001034]	0.652317	7.52572
NM_001400	S1PR1	NM_001400 || S1PR1 || Homo sapiens sphingosine-1-phosphate receptor 1 (S1PR1), mRNA [NM_001400]	0.651967	8.63617
NM_023070	ZFP69B	NM_023070 || ZFP69B || Homo sapiens ZFP69 zinc finger protein B (ZFP69B), mRNA [NM_023070]	0.651516	5.21721
NM_052971	LEAP2	NM_052971 || LEAP2 || Homo sapiens liver expressed antimicrobial peptide 2 (LEAP2), mRNA [NM_052971]	0.650749	6.02246
THC2505091		THC2505091 || || Unknown	0.649849	4.98801
NM_003038	SLC1A4	NM_003038 || SLC1A4 || Homo sapiens solute carrier family 1 (glutamate/neutral amino acid transporter), member 4 (SLC1A4), transcript variant 1, mRNA [NM_003038]	0.649474	5.23385
NR_003664	SPDYE8P	NR_003664 || SPDYE8P || Homo sapiens speedy/RINGO cell cycle regulator family member E8, pseudogene (SPDYE8P), non-coding RNA [NR_003664]	0.646442	4.73474
NM_003527	HIST1H2BO	NM_003527 || HIST1H2BO || Homo sapiens histone cluster 1, H2bo (HIST1H2BO), mRNA [NM_003527]	0.645408	7.69798
NM_006206	PDGFRA	NM_006206 || PDGFRA || Homo sapiens platelet-derived growth factor receptor, alpha polypeptide (PDGFRA), mRNA [NM_006206]	0.645246	5.32081
NM_001142483	NREP	NM_001142483 || NREP || Homo sapiens neuronal regeneration related protein (NREP), transcript variant 11, mRNA [NM_001142483]	0.644314	7.42878
lnc-ANKRD11-1:2	lnc-ANKRD11-1	lnc-ANKRD11-1:2 || lnc-ANKRD11-1 || AGENCOURT_7892117 NIH_MGC_67 Homo sapiens cDNA clone IMAGE:6139956 5', mRNA sequence [BU187512]	0.644303	5.54936
NM_003524	HIST1H2BH	NM_003524 || HIST1H2BH || Homo sapiens histone cluster 1, H2bh (HIST1H2BH), mRNA [NM_003524]	0.642824	5.09704
NM_001078	VCAM1	NM_001078 || VCAM1 || Homo sapiens vascular cell adhesion molecule 1 (VCAM1), transcript variant 1, mRNA [NM_001078]	0.641746	9.09824
NM_003518	HIST1H2BG	NM_003518 || HIST1H2BG || Homo sapiens histone cluster 1, H2bg (HIST1H2BG), mRNA [NM_003518]	0.641547	6.46799
NM_001002294	FMO3	NM_001002294 || FMO3 || Homo sapiens flavin containing monooxygenase 3 (FMO3), transcript variant 2, mRNA [NM_001002294]	0.640979	6.20157
NM_001001715	FARP1	NM_001001715 || FARP1 || Homo sapiens FERM, RhoGEF (ARHGEF) and pleckstrin domain protein 1 (chondrocyte-derived) (FARP1), transcript variant 2, mRNA [NM_001001715]	0.640635	9.71831
NM_004386	NCAN	NM_004386 || NCAN || Homo sapiens neurocan (NCAN), mRNA [NM_004386]	0.640216	9.09824
TCONS_l2_00024286	XLOC_l2_012605	TCONS_l2_00024286 || XLOC_l2_012605 || BROAD Institute lincRNA (XLOC_l2_012605), lincRNA [TCONS_l2_00024286]	0.64009	8.63617
NM_001080456	ZSCAN5B	NM_001080456 || ZSCAN5B || Homo sapiens zinc finger and SCAN domain containing 5B (ZSCAN5B), mRNA [NM_001080456]	0.638949	9.71831
NM_001014809	CRMP1	NM_001014809 || CRMP1 || Homo sapiens collapsin response mediator protein 1 (CRMP1), transcript variant 1, mRNA [NM_001014809]	0.638853	5.02031
lnc-UQCRFS1-9:20	lnc-UQCRFS1-9	lnc-UQCRFS1-9:20 || lnc-UQCRFS1-9 || Q5A5F0_CANAL (Q5A5F0) Possible mitochondrial Complex I, subunit 1, partial (12%) [THC2535688]	0.637194	9.71831
NM_021063	HIST1H2BD	NM_021063 || HIST1H2BD || Homo sapiens histone cluster 1, H2bd (HIST1H2BD), transcript variant 1, mRNA [NM_021063]	0.635613	6.46799
NM_020139	BDH2	NM_020139 || BDH2 || Homo sapiens 3-hydroxybutyrate dehydrogenase, type 2 (BDH2), mRNA [NM_020139]	0.634687	5.07746
NM_020225	STOX2	NM_020225 || STOX2 || Homo sapiens storkhead box 2 (STOX2), mRNA [NM_020225]	0.634212	6.20157
NM_013353	TMOD4	NM_013353 || TMOD4 || Homo sapiens tropomodulin 4 (muscle) (TMOD4), mRNA [NM_013353]	0.633772	9.02512
TCONS_l2_00030903	XLOC_l2_015894	TCONS_l2_00030903 || XLOC_l2_015894 || BROAD Institute lincRNA (XLOC_l2_015894), lincRNA [TCONS_l2_00030903]	0.633395	7.42878
NR_024607	MIR503HG	NR_024607 || MIR503HG || Homo sapiens MIR503 host gene (non-protein coding) (MIR503HG), long non-coding RNA [NR_024607]	0.633009	4.71853
NM_014033	METTL7A	NM_014033 || METTL7A || Homo sapiens methyltransferase like 7A (METTL7A), mRNA [NM_014033]	0.632686	6.20157
NM_021998	ZNF711	NM_021998 || ZNF711 || Homo sapiens zinc finger protein 711 (ZNF711), mRNA [NM_021998]	0.632482	7.42878
NR_033312	BDNF-AS	NR_033312 || BDNF-AS || Homo sapiens BDNF antisense RNA (BDNF-AS), transcript variant BT1C, long non-coding RNA [NR_033312]	0.631754	5.3536
NM_199235	COLEC11	NM_199235 || COLEC11 || Homo sapiens collectin sub-family member 11 (COLEC11), transcript variant 2, mRNA [NM_199235]	0.631189	5.23385
NM_024787	RNF122	NM_024787 || RNF122 || Homo sapiens ring finger protein 122 (RNF122), mRNA [NM_024787]	0.630894	4.99764
NM_003526	HIST1H2BC	NM_003526 || HIST1H2BC || Homo sapiens histone cluster 1, H2bc (HIST1H2BC), mRNA [NM_003526]	0.630478	6.46799
NR_045116	C5orf56	NR_045116 || C5orf56 || Homo sapiens chromosome 5 open reading frame 56 (C5orf56), long non-coding RNA [NR_045116]	0.630001	9.71831
NM_003598	TEAD2	NM_003598 || TEAD2 || Homo sapiens TEA domain family member 2 (TEAD2), transcript variant 5, mRNA [NM_003598]	0.629982	5.4675
NM_014421	DKK2	NM_014421 || DKK2 || Homo sapiens dickkopf WNT signaling pathway inhibitor 2 (DKK2), mRNA [NM_014421]	0.628984	5.09704
NM_000393	COL5A2	NM_000393 || COL5A2 || Homo sapiens collagen, type V, alpha 2 (COL5A2), mRNA [NM_000393]	0.628875	5.63318
NM_001042463	TMEM80	NM_001042463 || TMEM80 || Homo sapiens transmembrane protein 80 (TMEM80), transcript variant 2, mRNA [NM_001042463]	0.627796	4.34915
NM_032622	LNX1	NM_032622 || LNX1 || Homo sapiens ligand of numb-protein X 1, E3 ubiquitin protein ligase (LNX1), transcript variant 2, mRNA [NM_032622]	0.627639	7.51517
NM_199511	CCDC80	NM_199511 || CCDC80 || Homo sapiens coiled-coil domain containing 80 (CCDC80), transcript variant 1, mRNA [NM_199511]	0.627082	7.49605
NR_037701	PKI55	NR_037701 || PKI55 || Homo sapiens DKFZp434H1419 (PKI55), long non-coding RNA [NR_037701]	0.626045	7.57234
ENST00000444438		ENST00000444438 || || long intergenic non-protein coding RNA 843 [Source:HGNC Symbol;Acc:HGNC:45009] [ENST00000444438]	0.625131	6.20157
NM_001710	CFB	NM_001710 || CFB || Homo sapiens complement factor B (CFB), mRNA [NM_001710]	0.623534	7.42878
NM_000361	THBD	NM_000361 || THBD || Homo sapiens thrombomodulin (THBD), mRNA [NM_000361]	0.623446	5.33647
lnc-SRPX2-1:1	lnc-SRPX2-1	lnc-SRPX2-1:1 || lnc-SRPX2-1 || Homo sapiens full length insert cDNA clone ZD89B07. [AF086477]	0.623233	7.33527
NM_003519	HIST1H2BL	NM_003519 || HIST1H2BL || Homo sapiens histone cluster 1, H2bl (HIST1H2BL), mRNA [NM_003519]	0.623192	5.85955
THC2548955		THC2548955 || || Q14867_HUMAN (Q14867) K222 protein (Fragment), complete [THC2548955]	0.622337	7.42878
NM_152829	TES	NM_152829 || TES || Homo sapiens testis derived transcript (3 LIM domains) (TES), transcript variant 2, mRNA [NM_152829]	0.621115	7.49783
A_33_P3212700		A_33_P3212700 || unmapped	0.621091	7.24228
NM_006207	PDGFRL	NM_006207 || PDGFRL || Homo sapiens platelet-derived growth factor receptor-like (PDGFRL), mRNA [NM_006207]	0.619841	6.77785
NM_001085375	C1orf226	NM_001085375 || C1orf226 || Homo sapiens chromosome 1 open reading frame 226 (C1orf226), transcript variant 2, mRNA [NM_001085375]	0.617516	7.464
NM_004184	WARS	NM_004184 || WARS || Homo sapiens tryptophanyl-tRNA synthetase (WARS), transcript variant 1, mRNA [NM_004184]	0.61637	7.7571
NM_015065	EXPH5	NM_015065 || EXPH5 || Homo sapiens exophilin 5 (EXPH5), mRNA [NM_015065]	0.615836	9.58292
ENST00000511103		ENST00000511103 || || asparagine synthetase pseudogene 4 [Source:HGNC Symbol;Acc:HGNC:39400] [ENST00000511103]	0.615158	5.4675
NM_017523	XAF1	NM_017523 || XAF1 || Homo sapiens XIAP associated factor 1 (XAF1), transcript variant 1, mRNA [NM_017523]	0.612204	7.55084
NM_021073	BMP5	NM_021073 || BMP5 || Homo sapiens bone morphogenetic protein 5 (BMP5), mRNA [NM_021073]	0.611394	7.32409
NM_001673	ASNS	NM_001673 || ASNS || Homo sapiens asparagine synthetase (glutamine-hydrolyzing) (ASNS), transcript variant 2, mRNA [NM_001673]	0.610927	5.63318
lnc-GPR20-1:1	lnc-GPR20-1	lnc-GPR20-1:1 || lnc-GPR20-1 || LNCipedia lincRNA (lnc-GPR20-1), lincRNA [lnc-GPR20-1:1]	0.610908	5.33647
lnc-ZNF585B-1:1	lnc-ZNF585B-1	lnc-ZNF585B-1:1 || lnc-ZNF585B-1 || LNCipedia lincRNA (lnc-ZNF585B-1), lincRNA [lnc-ZNF585B-1:1]	0.610301	7.43812
NM_002589	PCDH7	NM_002589 || PCDH7 || Homo sapiens protocadherin 7 (PCDH7), transcript variant a, mRNA [NM_002589]	0.609982	5.20757
ENST00000518968		ENST00000518968 || || phosphoserine aminotransferase 1 pseudogene 1 [Source:HGNC Symbol;Acc:HGNC:15785] [ENST00000518968]	0.608117	7.06359
NM_052880	PIK3IP1	NM_052880 || PIK3IP1 || Homo sapiens phosphoinositide-3-kinase interacting protein 1 (PIK3IP1), transcript variant 1, mRNA [NM_052880]	0.607756	5.07746
NM_006907	PYCR1	NM_006907 || PYCR1 || Homo sapiens pyrroline-5-carboxylate reductase 1 (PYCR1), transcript variant 1, mRNA [NM_006907]	0.605483	5.90285
NM_032051	PATZ1	NM_032051 || PATZ1 || Homo sapiens POZ (BTB) and AT hook containing zinc finger 1 (PATZ1), transcript variant 4, mRNA [NM_032051]	0.604761	5.48847
NM_002543	OLR1	NM_002543 || OLR1 || Homo sapiens oxidized low density lipoprotein (lectin-like) receptor 1 (OLR1), transcript variant 1, mRNA [NM_002543]	0.604677	5.78088
TCONS_l2_00018962	XLOC_l2_009968	TCONS_l2_00018962 || XLOC_l2_009968 || BROAD Institute lincRNA (XLOC_l2_009968), lincRNA [TCONS_l2_00018962]	0.604008	8.63617
NM_052946	NOSTRIN	NM_052946 || NOSTRIN || Homo sapiens nitric oxide synthase trafficking (NOSTRIN), transcript variant 1, mRNA [NM_052946]	0.603872	7.49346
NM_001002029	C4B	NM_001002029 || C4B || Homo sapiens complement component 4B (Chido blood group) (C4B), mRNA [NM_001002029]	0.603728	6.93502
NM_018334	LRRN3	NM_018334 || LRRN3 || Homo sapiens leucine rich repeat neuronal 3 (LRRN3), transcript variant 3, mRNA [NM_018334]	0.603488	7.15213
NM_030632	ASXL3	NM_030632 || ASXL3 || Homo sapiens additional sex combs like transcriptional regulator 3 (ASXL3), mRNA [NM_030632]	0.603392	8.22035
XM_006719177	LOC102724747	XM_006719177 || LOC102724747 || PREDICTED: Homo sapiens ovostatin homolog 2-like (LOC102724747), partial mRNA [XM_006719177]	0.60289	7.49783
NM_006636	MTHFD2	NM_006636 || MTHFD2 || Homo sapiens methylenetetrahydrofolate dehydrogenase (NADP+ dependent) 2, methenyltetrahydrofolate cyclohydrolase (MTHFD2), transcript variant 1, mRNA [NM_006636]	0.60214	7.06359
XR_428440	LOC101930053	XR_428440 || LOC101930053 || PREDICTED: Homo sapiens uncharacterized LOC101930053 (LOC101930053), transcript variant X1, ncRNA [XR_428440]	0.601577	7.32409
NM_198508	KLRG2	NM_198508 || KLRG2 || Homo sapiens killer cell lectin-like receptor subfamily G, member 2 (KLRG2), mRNA [NM_198508]	0.601439	5.63318
NM_152525	ALS2CR11	NM_152525 || ALS2CR11 || Homo sapiens amyotrophic lateral sclerosis 2 (juvenile) chromosome region, candidate 11 (ALS2CR11), transcript variant 2, mRNA [NM_152525]	0.600826	9.41156
NM_004385	VCAN	NM_004385 || VCAN || Homo sapiens versican (VCAN), transcript variant 1, mRNA [NM_004385]	0.594462	6.68641
TCONS_l2_00028188	XLOC_l2_014504	TCONS_l2_00028188 || XLOC_l2_014504 || BROAD Institute lincRNA (XLOC_l2_014504), lincRNA [TCONS_l2_00028188]	0.592569	5.3528
NM_015975	TAF9B	NM_015975 || TAF9B || Homo sapiens TAF9B RNA polymerase II, TATA box binding protein (TBP)-associated factor, 31kDa (TAF9B), mRNA [NM_015975]	0.592074	6.46799
NM_001031690	FAM131B	NM_001031690 || FAM131B || Homo sapiens family with sequence similarity 131, member B (FAM131B), transcript variant a, mRNA [NM_001031690]	0.591871	5.162
ENST00000361899	ATP6	ENST00000361899 || ATP6 || mitochondrially encoded ATP synthase 6 [Source:HGNC Symbol;Acc:HGNC:7414] [ENST00000361899]	0.591816	7.57234
NM_020663	RHOJ	NM_020663 || RHOJ || Homo sapiens ras homolog family member J (RHOJ), mRNA [NM_020663]	0.591314	9.09824
NM_004469	FIGF	NM_004469 || FIGF || Homo sapiens c-fos induced growth factor (vascular endothelial growth factor D) (FIGF), mRNA [NM_004469]	0.590684	7.49605
NM_152753	SCUBE3	NM_152753 || SCUBE3 || Homo sapiens signal peptide, CUB domain, EGF-like 3 (SCUBE3), transcript variant 1, mRNA [NM_152753]	0.588672	9.02512
NM_015512	DNAH1	NM_015512 || DNAH1 || Homo sapiens dynein, axonemal, heavy chain 1 (DNAH1), mRNA [NM_015512]	0.58831	8.74194
TCONS_l2_00022450	XLOC_l2_011692	TCONS_l2_00022450 || XLOC_l2_011692 || BROAD Institute lincRNA (XLOC_l2_011692), lincRNA [TCONS_l2_00022450]	0.587414	8.90776
NR_026861	LINC00473	NR_026861 || LINC00473 || Homo sapiens long intergenic non-protein coding RNA 473 (LINC00473), transcript variant 2, long non-coding RNA [NR_026861]	0.586685	7.33527
NM_032599	FAM71F1	NM_032599 || FAM71F1 || Homo sapiens family with sequence similarity 71, member F1 (FAM71F1), transcript variant 1, mRNA [NM_032599]	0.585707	6.09912
NM_138356	SHF	NM_138356 || SHF || Homo sapiens Src homology 2 domain containing F (SHF), transcript variant 2, mRNA [NM_138356]	0.584465	4.56985
NM_004563	PCK2	NM_004563 || PCK2 || Homo sapiens phosphoenolpyruvate carboxykinase 2 (mitochondrial) (PCK2), transcript variant 1, mRNA [NM_004563]	0.584434	5.21898
NM_004495	NRG1	NM_004495 || NRG1 || Homo sapiens neuregulin 1 (NRG1), transcript variant HRG-gamma, mRNA [NM_004495]	0.584319	8.74194
NM_024837	ATP8B4	NM_024837 || ATP8B4 || Homo sapiens ATPase, class I, type 8B, member 4 (ATP8B4), transcript variant 1, mRNA [NM_024837]	0.584136	7.06359
NM_000014	A2M	NM_000014 || A2M || Homo sapiens alpha-2-macroglobulin (A2M), mRNA [NM_000014]	0.583975	9.41156
NM_203373	FBXL22	NM_203373 || FBXL22 || Homo sapiens F-box and leucine-rich repeat protein 22 (FBXL22), mRNA [NM_203373]	0.583595	9.02512
NM_030936	RNF32	NM_030936 || RNF32 || Homo sapiens ring finger protein 32 (RNF32), transcript variant 3, mRNA [NM_030936]	0.583274	5.55177
XR_110828	LOC284561	XR_110828 || LOC284561 || PREDICTED: Homo sapiens uncharacterized LOC284561 (LOC284561), misc_RNA [XR_110828]	0.582719	6.93502
TCONS_l2_00018461	XLOC_l2_009639	TCONS_l2_00018461 || XLOC_l2_009639 || BROAD Institute lincRNA (XLOC_l2_009639), lincRNA [TCONS_l2_00018461]	0.582504	9.02512
NM_000337	SGCD	NM_000337 || SGCD || Homo sapiens sarcoglycan, delta (35kDa dystrophin-associated glycoprotein) (SGCD), transcript variant 1, mRNA [NM_000337]	0.580274	7.36144
NM_000599	IGFBP5	NM_000599 || IGFBP5 || Homo sapiens insulin-like growth factor binding protein 5 (IGFBP5), mRNA [NM_000599]	0.580152	4.99428
NR_122038	ZNF561-AS1	NR_122038 || ZNF561-AS1 || Homo sapiens ZNF561 antisense RNA 1 (head to head) (ZNF561-AS1), long non-coding RNA [NR_122038]	0.580021	8.78289
lnc-CERS5-1:1	lnc-CERS5-1	lnc-CERS5-1:1 || lnc-CERS5-1 || Homo sapiens mRNA; cDNA DKFZp686E22244 (from clone DKFZp686E22244). [BX647194]	0.578772	9.89183
NM_000163	GHR	NM_000163 || GHR || Homo sapiens growth hormone receptor (GHR), transcript variant 1, mRNA [NM_000163]	0.578766	5.162
NM_001145033	C11orf96	NM_001145033 || C11orf96 || Homo sapiens chromosome 11 open reading frame 96 (C11orf96), mRNA [NM_001145033]	0.578749	8.22035
NM_000880	IL7	NM_000880 || IL7 || Homo sapiens interleukin 7 (IL7), transcript variant 1, mRNA [NM_000880]	0.578678	8.78289
lnc-PODN-1:1	lnc-PODN-1	lnc-PODN-1:1 || lnc-PODN-1 || Homo sapiens cDNA FLJ36729 fis, clone UTERU2012581. [AK094048]	0.578671	7.43812
NM_005733	KIF20A	NM_005733 || KIF20A || Homo sapiens kinesin family member 20A (KIF20A), mRNA [NM_005733]	0.578159	5.32081
NM_058179	PSAT1	NM_058179 || PSAT1 || Homo sapiens phosphoserine aminotransferase 1 (PSAT1), transcript variant 1, mRNA [NM_058179]	0.577822	5.54936
NM_001718	BMP6	NM_001718 || BMP6 || Homo sapiens bone morphogenetic protein 6 (BMP6), mRNA [NM_001718]	0.576014	5.02031
NM_001202	BMP4	NM_001202 || BMP4 || Homo sapiens bone morphogenetic protein 4 (BMP4), transcript variant 1, mRNA [NM_001202]	0.575928	8.78289
NM_001129993	KIAA1841	NM_001129993 || KIAA1841 || Homo sapiens KIAA1841 (KIAA1841), transcript variant 1, mRNA [NM_001129993]	0.574264	8.08508
NM_005269	GLI1	NM_005269 || GLI1 || Homo sapiens GLI family zinc finger 1 (GLI1), transcript variant 1, mRNA [NM_005269]	0.572843	5.48847
NM_153000	APCDD1	NM_153000 || APCDD1 || Homo sapiens adenomatosis polyposis coli down-regulated 1 (APCDD1), mRNA [NM_153000]	0.572377	7.24228
A_33_P3262537		A_33_P3262537 || unmapped	0.572198	7.69798
AK091571	LOC285178	AK091571 || LOC285178 || Homo sapiens cDNA FLJ34252 fis, clone FCBBF5000061. [AK091571]	0.57094	8.44455
NR_046473	MEG3	NR_046473 || MEG3 || Homo sapiens maternally expressed 3 (non-protein coding) (MEG3), transcript variant 16, long non-coding RNA [NR_046473]	0.569359	9.09824
NR_015375	VLDLR-AS1	NR_015375 || VLDLR-AS1 || Homo sapiens VLDLR antisense RNA 1 (VLDLR-AS1), long non-coding RNA [NR_015375]	0.568923	7.42878
NM_001162936	SMIM9	NM_001162936 || SMIM9 || Homo sapiens small integral membrane protein 9 (SMIM9), mRNA [NM_001162936]	0.568351	9.89183
NM_021197	WFDC1	NM_021197 || WFDC1 || Homo sapiens WAP four-disulfide core domain 1 (WFDC1), transcript variant 1, mRNA [NM_021197]	0.567506	7.69798
NM_207413	FAM150A	NM_207413 || FAM150A || Homo sapiens family with sequence similarity 150, member A (FAM150A), mRNA [NM_207413]	0.566166	7.54743
NM_022137	SMOC1	NM_022137 || SMOC1 || Homo sapiens SPARC related modular calcium binding 1 (SMOC1), transcript variant 2, mRNA [NM_022137]	0.565772	5.02031
NM_021992	TMSB15A	NM_021992 || TMSB15A || Homo sapiens thymosin beta 15a (TMSB15A), mRNA [NM_021992]	0.562606	9.31914
ENST00000368656	FAM229B	ENST00000368656 || FAM229B || family with sequence similarity 229, member B [Source:HGNC Symbol;Acc:HGNC:33858] [ENST00000368656]	0.559579	5.54936
NR_038849	LINC01133	NR_038849 || LINC01133 || Homo sapiens long intergenic non-protein coding RNA 1133 (LINC01133), long non-coding RNA [NR_038849]	0.557941	5.02031
NM_020485	RHCE	NM_020485 || RHCE || Homo sapiens Rh blood group, CcEe antigens (RHCE), transcript variant 1, mRNA [NM_020485]	0.556351	5.18531
NM_020211	RGMA	NM_020211 || RGMA || Homo sapiens repulsive guidance molecule family member a (RGMA), transcript variant 4, mRNA [NM_020211]	0.556027	4.5153
ENST00000597683		ENST00000597683 || || Unknown	0.548994	5.78088
NM_003326	TNFSF4	NM_003326 || TNFSF4 || Homo sapiens tumor necrosis factor (ligand) superfamily, member 4 (TNFSF4), transcript variant 1, mRNA [NM_003326]	0.54843	7.42878
ENST00000439132		ENST00000439132 || || phosphoserine aminotransferase 1 pseudogene 3 [Source:HGNC Symbol;Acc:HGNC:43989] [ENST00000439132]	0.547532	8.22035
NM_001093726	SEPP1	NM_001093726 || SEPP1 || Homo sapiens selenoprotein P, plasma, 1 (SEPP1), transcript variant 3, mRNA [NM_001093726]	0.547487	5.78981
NM_012338	TSPAN12	NM_012338 || TSPAN12 || Homo sapiens tetraspanin 12 (TSPAN12), mRNA [NM_012338]	0.547446	5.21721
NM_016192	TMEFF2	NM_016192 || TMEFF2 || Homo sapiens transmembrane protein with EGF-like and two follistatin-like domains 2 (TMEFF2), mRNA [NM_016192]	0.54661	9.09824
NM_000362	TIMP3	NM_000362 || TIMP3 || Homo sapiens TIMP metallopeptidase inhibitor 3 (TIMP3), mRNA [NM_000362]	0.545259	8.63617
BC010926	HIST1H4H	BC010926 || HIST1H4H || Homo sapiens histone cluster 1, H4h, mRNA (cDNA clone IMAGE:4273904). [BC010926]	0.542959	7.51517
NM_001001924	MTUS1	NM_001001924 || MTUS1 || Homo sapiens microtubule associated tumor suppressor 1 (MTUS1), transcript variant 1, mRNA [NM_001001924]	0.539761	5.02031
NM_002053	GBP1	NM_002053 || GBP1 || Homo sapiens guanylate binding protein 1, interferon-inducible (GBP1), mRNA [NM_002053]	0.539622	9.09824
NR_122031	GAS8-AS1	NR_122031 || GAS8-AS1 || Homo sapiens GAS8 antisense RNA 1 (GAS8-AS1), long non-coding RNA [NR_122031]	0.537705	5.09704
ENST00000416718	LOC101929612	ENST00000416718 || LOC101929612 || mitochondrially encoded cytochrome c oxidase III [Source:HGNC Symbol;Acc:HGNC:7422] [ENST00000362079]	0.534354	7.32409
NM_000550	TYRP1	NM_000550 || TYRP1 || Homo sapiens tyrosinase-related protein 1 (TYRP1), mRNA [NM_000550]	0.529955	4.69601
ENST00000413185	LOC101927043	ENST00000413185 || LOC101927043 || ALU1_HUMAN (P39188) Alu subfamily J sequence contamination warning entry, partial (20%) [THC2550964]	0.527275	5.43684
NM_001286123	SLC17A2	NM_001286123 || SLC17A2 || Homo sapiens solute carrier family 17, member 2 (SLC17A2), transcript variant 1, mRNA [NM_001286123]	0.514817	8.01557
NM_171998	RAB39B	NM_171998 || RAB39B || Homo sapiens RAB39B, member RAS oncogene family (RAB39B), mRNA [NM_171998]	0.513424	5.63318
ENST00000518014	MIR143HG	ENST00000518014 || MIR143HG || MIR143 host gene (non-protein coding) [Source:HGNC Symbol;Acc:HGNC:42872] [ENST00000518014]	0.511267	7.42878
NM_031479	INHBE	NM_031479 || INHBE || Homo sapiens inhibin, beta E (INHBE), mRNA [NM_031479]	0.507323	5.90285
NM_001781	CD69	NM_001781 || CD69 || Homo sapiens CD69 molecule (CD69), mRNA [NM_001781]	0.506699	7.36144
ENST00000607314		ENST00000607314 || || Homo sapiens MSTP131 (MST131) mRNA, complete cds. [AF176921]	0.504623	7.81449
ENST00000442578		ENST00000442578 || || Unknown	0.501448	6.93502
ENST00000314088	HIST1H2AC	ENST00000314088 || HIST1H2AC || histone cluster 1, H2ac [Source:HGNC Symbol;Acc:HGNC:4733] [ENST00000314088]	0.483928	5.40318
NM_005410	SEPP1	NM_005410 || SEPP1 || Homo sapiens selenoprotein P, plasma, 1 (SEPP1), transcript variant 1, mRNA [NM_005410]	0.482776	5.4675
NM_206919	ARL9	NM_206919 || ARL9 || Homo sapiens ADP-ribosylation factor-like 9 (ARL9), mRNA [NM_206919]	0.475179	4.99428
NM_005639	SYT1	NM_005639 || SYT1 || Homo sapiens synaptotagmin I (SYT1), transcript variant 1, mRNA [NM_005639]	0.474774	9.58292
NM_013989	DIO2	NM_013989 || DIO2 || Homo sapiens deiodinase, iodothyronine, type II (DIO2), transcript variant 1, mRNA [NM_013989]	0.473113	7.15213
NM_001114173	CTSC	NM_001114173 || CTSC || Homo sapiens cathepsin C (CTSC), transcript variant 3, mRNA [NM_001114173]	0.470838	7.43812
NM_001034852	SMOC1	NM_001034852 || SMOC1 || Homo sapiens SPARC related modular calcium binding 1 (SMOC1), transcript variant 1, mRNA [NM_001034852]	0.451999	4.5153
NM_148170	CTSC	NM_148170 || CTSC || Homo sapiens cathepsin C (CTSC), transcript variant 2, mRNA [NM_148170]	0.450048	7.49783
NM_001008394	EID3	NM_001008394 || EID3 || Homo sapiens EP300 interacting inhibitor of differentiation 3 (EID3), mRNA [NM_001008394]	0.447501	6.46799
NM_004120	GBP2	NM_004120 || GBP2 || Homo sapiens guanylate binding protein 2, interferon-inducible (GBP2), mRNA [NM_004120]	0.441064	8.22035
NR_040073	MIR181A1HG	NR_040073 || MIR181A1HG || Homo sapiens MIR181A1 host gene (non-protein coding) (MIR181A1HG), long non-coding RNA [NR_040073]	0.439569	7.7571
lnc-SEMA6C-1:1	lnc-SEMA6C-1	lnc-SEMA6C-1:1 || lnc-SEMA6C-1 || LNCipedia lincRNA (lnc-SEMA6C-1), lincRNA [lnc-SEMA6C-1:1]	0.437156	3.97637
NM_005822	RCAN2	NM_005822 || RCAN2 || Homo sapiens regulator of calcineurin 2 (RCAN2), transcript variant 1, mRNA [NM_005822]	0.437045	8.17925
NM_002374	MAP2	NM_002374 || MAP2 || Homo sapiens microtubule-associated protein 2 (MAP2), transcript variant 1, mRNA [NM_002374]	0.42915	7.57234
NM_000238	KCNH2	NM_000238 || KCNH2 || Homo sapiens potassium voltage-gated channel, subfamily H (eag-related), member 2 (KCNH2), transcript variant 1, mRNA [NM_000238]	0.423615	9.02512
NM_014817	TRIL	NM_014817 || TRIL || Homo sapiens TLR4 interactor with leucine-rich repeats (TRIL), mRNA [NM_014817]	0.418439	8.22035
NM_001080505	SHISA3	NM_001080505 || SHISA3 || Homo sapiens shisa family member 3 (SHISA3), mRNA [NM_001080505]	0.415619	5.87829
NM_206963	RARRES1	NM_206963 || RARRES1 || Homo sapiens retinoic acid receptor responder (tazarotene induced) 1 (RARRES1), transcript variant 1, mRNA [NM_206963]	0.41375	9.09824
NM_002612	PDK4	NM_002612 || PDK4 || Homo sapiens pyruvate dehydrogenase kinase, isozyme 4 (PDK4), mRNA [NM_002612]	0.41206	5.55569
NM_080759	DACH1	NM_080759 || DACH1 || Homo sapiens dachshund family transcription factor 1 (DACH1), transcript variant 1, mRNA [NM_080759]	0.403687	9.71831
ENST00000359193	HIST1H2AG	ENST00000359193 || HIST1H2AG || histone cluster 1, H2ag [Source:HGNC Symbol;Acc:HGNC:4737] [ENST00000359193]	0.403264	5.57859
NM_020169	LXN	NM_020169 || LXN || Homo sapiens latexin (LXN), mRNA [NM_020169]	0.39551	8.08508
NM_023940	RASL11B	NM_023940 || RASL11B || Homo sapiens RAS-like, family 11, member B (RASL11B), mRNA [NM_023940]	0.369823	5.63318
NM_000559	HBG1	NM_000559 || HBG1 || Homo sapiens hemoglobin, gamma A (HBG1), mRNA [NM_000559]	0.368814	9.41156
NM_001009909	LUZP2	NM_001009909 || LUZP2 || Homo sapiens leucine zipper protein 2 (LUZP2), transcript variant 1, mRNA [NM_001009909]	0.314749	5.43684
NR_075093	SOX2-OT	NR_075093 || SOX2-OT || Homo sapiens SOX2 overlapping transcript (SOX2-OT), transcript variant 3, long non-coding RNA [NR_075093]	0.314345	9.41156
NM_014737	RASSF2	NM_014737 || RASSF2 || Homo sapiens Ras association (RalGDS/AF-6) domain family member 2 (RASSF2), transcript variant 1, mRNA [NM_014737]	0.31295	8.78289
NM_001040113	MYH11	NM_001040113 || MYH11 || Homo sapiens myosin, heavy chain 11, smooth muscle (MYH11), transcript variant SM2B, mRNA [NM_001040113]	0.240519	7.57234
NM_133477	SYNPO2	NM_133477 || SYNPO2 || Homo sapiens synaptopodin 2 (SYNPO2), transcript variant 1, mRNA [NM_133477]	0.194587	7.49346

## Sheet: Gr-5D-CD, non-toxic
NCBI RefSeq	Gene Symbol	NBCI RefSeq || Gene Symbol || Gene Description (total # of significant genes: 188; 139 up, 49 down)	Normalized Fold (Unlogged)	q-value (%)
NM_002507	NGFR	NM_002507 || NGFR || Homo sapiens nerve growth factor receptor (NGFR), mRNA [NM_002507]	3.69903	9.38088
NM_004102	FABP3	NM_004102 || FABP3 || Homo sapiens fatty acid binding protein 3, muscle and heart (FABP3), mRNA [NM_004102]	3.59358	7.61179
NM_001740	CALB2	NM_001740 || CALB2 || Homo sapiens calbindin 2 (CALB2), transcript variant CALB2, mRNA [NM_001740]	3.22357	8.60973
TCONS_l2_00022830	XLOC_l2_011987	TCONS_l2_00022830 || XLOC_l2_011987 || BROAD Institute lincRNA (XLOC_l2_011987), lincRNA [TCONS_l2_00022830]	3.2066	9.56465
lnc-HK2-1:1	lnc-HK2-1	lnc-HK2-1:1 || lnc-HK2-1 || LNCipedia lincRNA (lnc-HK2-1), lincRNA [lnc-HK2-1:1]	3.12923	8.74511
NM_004694	SLC16A6	NM_004694 || SLC16A6 || Homo sapiens solute carrier family 16, member 6 (SLC16A6), transcript variant 2, mRNA [NM_004694]	3.05143	9.53007
NM_032413	C15orf48	NM_032413 || C15orf48 || Homo sapiens chromosome 15 open reading frame 48 (C15orf48), transcript variant 2, mRNA [NM_032413]	2.95633	8.67771
NM_014278	HSPA4L	NM_014278 || HSPA4L || Homo sapiens heat shock 70kDa protein 4-like (HSPA4L), mRNA [NM_014278]	2.88014	8.7807
NM_005346	HSPA1B	NM_005346 || HSPA1B || Homo sapiens heat shock 70kDa protein 1B (HSPA1B), mRNA [NM_005346]	2.70588	8.6548
NM_004172	SLC1A3	NM_004172 || SLC1A3 || Homo sapiens solute carrier family 1 (glial high affinity glutamate transporter), member 3 (SLC1A3), transcript variant GLAST, mRNA [NM_004172]	2.6921	9.543
NR_110429	LINC01540	NR_110429 || LINC01540 || Homo sapiens long intergenic non-protein coding RNA 1540 (LINC01540), transcript variant 1, long non-coding RNA [NR_110429]	2.67796	7.4521
NM_024875	SYNPO2L	NM_024875 || SYNPO2L || Homo sapiens synaptopodin 2-like (SYNPO2L), transcript variant 2, mRNA [NM_024875]	2.67269	7.61179
AI830629		AI830629 || || wj10a11.x1 NCI_CGAP_Kid12 Homo sapiens cDNA clone IMAGE:2402396 3', mRNA sequence [AI830629]	2.655	7.38326
ENST00000453951	LINC01293	ENST00000453951 || LINC01293 || long intergenic non-protein coding RNA 1293 [Source:HGNC Symbol;Acc:HGNC:50362] [ENST00000453951]	2.6373	8.52189
NR_110428	LINC01540	NR_110428 || LINC01540 || Homo sapiens long intergenic non-protein coding RNA 1540 (LINC01540), transcript variant 2, long non-coding RNA [NR_110428]	2.48831	7.89271
NM_000804	FOLR3	NM_000804 || FOLR3 || Homo sapiens folate receptor 3 (gamma) (FOLR3), mRNA [NM_000804]	2.47225	7.26855
NM_007030	TPPP	NM_007030 || TPPP || Homo sapiens tubulin polymerization promoting protein (TPPP), mRNA [NM_007030]	2.44291	8.71535
NM_005345	HSPA1A	NM_005345 || HSPA1A || Homo sapiens heat shock 70kDa protein 1A (HSPA1A), mRNA [NM_005345]	2.43176	8.68736
NM_001159491	BRI3	NM_001159491 || BRI3 || Homo sapiens brain protein I3 (BRI3), transcript variant 2, mRNA [NM_001159491]	2.37929	7.5622
NM_002910	RENBP	NM_002910 || RENBP || Homo sapiens renin binding protein (RENBP), mRNA [NM_002910]	2.25056	8.64976
NM_002157	HSPE1	NM_002157 || HSPE1 || Homo sapiens heat shock 10kDa protein 1 (HSPE1), mRNA [NM_002157]	2.24492	9.45468	105 overlap, 79 up, 26 down (between Gr-5D-V & Gr-5D-CD):
NM_006644	HSPH1	NM_006644 || HSPH1 || Homo sapiens heat shock 105kDa/110kDa protein 1 (HSPH1), transcript variant 1, mRNA [NM_006644]	2.22267	9.53007	NGFR
ENST00000412797		ENST00000412797 || || PREDICTED: Homo sapiens low density lipoprotein receptor adaptor protein 1 (LDLRAP1), transcript variant X3, mRNA [XM_006710560]	2.16386	9.42945	SLC16A6
NM_003485	GPR68	NM_003485 || GPR68 || Homo sapiens G protein-coupled receptor 68 (GPR68), transcript variant 2, mRNA [NM_003485]	2.13531	8.6548	FABP3
ENST00000463841	HSPE1	ENST00000463841 || HSPE1 || heat shock 10kDa protein 1 [Source:HGNC Symbol;Acc:HGNC:5269] [ENST00000463841]	2.12321	9.4137	C15orf48
ENST00000440046		ENST00000440046 || || heat shock 10kDa protein 1 pseudogene 9 [Source:HGNC Symbol;Acc:HGNC:49328] [ENST00000440046]	2.09346	9.58375	SYNPO2L
lnc-ARHGAP26-4:5	lnc-ARHGAP26-4	lnc-ARHGAP26-4:5 || lnc-ARHGAP26-4 || DKFZp781J0760_r1 781 (synonym: hlcc4) Homo sapiens cDNA clone DKFZp781J0760 5', mRNA sequence [BX646148]	2.05596	7.61179	CALB2
NM_001005340	GPNMB	NM_001005340 || GPNMB || Homo sapiens glycoprotein (transmembrane) nmb (GPNMB), transcript variant 1, mRNA [NM_001005340]	2.04882	7.61179	FOLR3	19 overlap, 14 up, 5 down (affected by all group-5 molecules):
ENST00000418546		ENST00000418546 || || microRNA 29b-1 [Source:HGNC Symbol;Acc:HGNC:31619] [ENST00000418546]	2.03787	7.57953	HSPA1B	SYNPO2L
NM_033053	DMRTC1	NM_033053 || DMRTC1 || Homo sapiens DMRT-like family C1 (DMRTC1), mRNA [NM_033053]	2.0264	9.45468	HSPA4L	LINC01293
NM_145244	DDIT4L	NM_145244 || DDIT4L || Homo sapiens DNA-damage-inducible transcript 4-like (DDIT4L), mRNA [NM_145244]	1.98451	6.61894	lnc-HK2-1	LINC01540
NM_002156	HSPD1	NM_002156 || HSPD1 || Homo sapiens heat shock 60kDa protein 1 (chaperonin) (HSPD1), transcript variant 1, mRNA [NM_002156]	1.97382	8.83092	LINC01540	SH2D5
NM_138420	AHNAK2	NM_138420 || AHNAK2 || Homo sapiens AHNAK nucleoprotein 2 (AHNAK2), mRNA [NM_138420]	1.94406	7.52496	LINC01293	EMP1
NM_001218	CA12	NM_001218 || CA12 || Homo sapiens carbonic anhydrase XII (CA12), transcript variant 1, mRNA [NM_001218]	1.93586	8.64813	HSPA1A	STEAP1B
lnc-ROPN1L-2:1	lnc-ROPN1L-2	lnc-ROPN1L-2:1 || lnc-ROPN1L-2 || LNCipedia lincRNA (lnc-ROPN1L-2), lincRNA [lnc-ROPN1L-2:1]	1.93475	9.4137	SERPINB2	ARL4C
NM_003483	HMGA2	NM_003483 || HMGA2 || Homo sapiens high mobility group AT-hook 2 (HMGA2), transcript variant 1, mRNA [NM_003483]	1.92542	9.38088	TPPP	UPP1
ENST00000606227		ENST00000606227 || || PREDICTED: Homo sapiens LYR motif containing 4 (LYRM4), transcript variant X4, mRNA [XM_006715151]	1.9155	7.88608	GPR68	HMGA2
NM_018423	STYK1	NM_018423 || STYK1 || Homo sapiens serine/threonine/tyrosine kinase 1 (STYK1), mRNA [NM_018423]	1.9111	8.44407	HSPE1	AHNAK2
NM_002575	SERPINB2	NM_002575 || SERPINB2 || Homo sapiens serpin peptidase inhibitor, clade B (ovalbumin), member 2 (SERPINB2), transcript variant 2, mRNA [NM_002575]	1.89187	7.61179	HSPH1	SLC37A2
NM_001282431	ARL4C	NM_001282431 || ARL4C || Homo sapiens ADP-ribosylation factor-like 4C (ARL4C), transcript variant 1, mRNA [NM_001282431]	1.88022	7.61179	SLC1A3	NOG
NM_001611	ACP5	NM_001611 || ACP5 || Homo sapiens acid phosphatase 5, tartrate resistant (ACP5), transcript variant 4, mRNA [NM_001611]	1.87169	7.67079	lnc-ARHGAP26-4	JRK
NM_021570	BARX1	NM_021570 || BARX1 || Homo sapiens BARX homeobox 1 (BARX1), mRNA [NM_021570]	1.86057	8.44407	DDIT4L	DDIT4L
NR_003077	SNORD99	NR_003077 || SNORD99 || Homo sapiens small nucleolar RNA, C/D box 99 (SNORD99), small nucleolar RNA [NR_003077]	1.85997	9.58566	BRI3	PDGFRA
NM_001888	CRYM	NM_001888 || CRYM || Homo sapiens crystallin, mu (CRYM), mRNA [NM_001888]	1.8596	6.34315	HMGA2	SMOC1
NR_110813	LINC01476	NR_110813 || LINC01476 || Homo sapiens long intergenic non-protein coding RNA 1476 (LINC01476), long non-coding RNA [NR_110813]	1.84436	8.67958	AHNAK2	EID3
NM_001492	GDF1	NM_001492 || GDF1 || Homo sapiens growth differentiation factor 1 (GDF1), mRNA [NM_001492]	1.8423	8.15891	CA12	ASXL3
ENST00000511127		ENST00000511127 || || heat shock 60kDa protein 1 (chaperonin) pseudogene 5 [Source:HGNC Symbol;Acc:HGNC:5266] [ENST00000511127]	1.8418	8.71535	lnc-ROPN1L-2	PDK4
NM_001256192	PDCD6IP	NM_001256192 || PDCD6IP || Homo sapiens programmed cell death 6 interacting protein (PDCD6IP), transcript variant 4, mRNA [NM_001256192]	1.84082	8.67958	HSPD1
NM_012449	STEAP1	NM_012449 || STEAP1 || Homo sapiens six transmembrane epithelial antigen of the prostate 1 (STEAP1), mRNA [NM_012449]	1.82617	9.42945	ACP5
NM_001164460	STEAP1B	NM_001164460 || STEAP1B || Homo sapiens STEAP family member 1B (STEAP1B), transcript variant 1, mRNA [NM_001164460]	1.82609	8.66812	GPNMB
NM_001103161	SH2D5	NM_001103161 || SH2D5 || Homo sapiens SH2 domain containing 5 (SH2D5), transcript variant 1, mRNA [NM_001103161]	1.81636	7.91737	DMRTC1
A_33_P3332749		A_33_P3332749 || unmapped	1.81301	9.4137	HKDC1
ENST00000566485		ENST00000566485 || || Unknown	1.79519	8.00071	GDF1
ENST00000555069	ERO1L	ENST00000555069 || ERO1L || ERO1-like (S. cerevisiae) [Source:HGNC Symbol;Acc:HGNC:13280] [ENST00000555069]	1.78674	9.543	STEAP1B
NM_014412	CACYBP	NM_014412 || CACYBP || Homo sapiens calcyclin binding protein (CACYBP), transcript variant 1, mRNA [NM_014412]	1.77688	9.64574	CACYBP
TCONS_l2_00015391	XLOC_l2_007395	TCONS_l2_00015391 || XLOC_l2_007395 || BROAD Institute lincRNA (XLOC_l2_007395), lincRNA [TCONS_l2_00015391]	1.77018	8.15891	ERO1L
TCONS_l2_00013123	XLOC_l2_007059	TCONS_l2_00013123 || XLOC_l2_007059 || BROAD Institute lincRNA (XLOC_l2_007059), lincRNA [TCONS_l2_00013123]	1.76514	8.60973	lnc-FOXL1-2
NR_002441	SNORD18A	NR_002441 || SNORD18A || Homo sapiens small nucleolar RNA, C/D box 18A (SNORD18A), small nucleolar RNA [NR_002441]	1.7506	7.1596	ARL4C
ENST00000439432	SMAP1	ENST00000439432 || SMAP1 || small ArfGAP 1 [Source:HGNC Symbol;Acc:HGNC:19651] [ENST00000439432]	1.74174	9.45468	lnc-GDF5-1
lnc-SAA2-2:1	lnc-SAA2-2	lnc-SAA2-2:1 || lnc-SAA2-2 || LNCipedia lincRNA (lnc-SAA2-2), lincRNA [lnc-SAA2-2:1]	1.74079	8.23466	SH2D5
NM_020704	STRIP2	NM_020704 || STRIP2 || Homo sapiens striatin interacting protein 2 (STRIP2), transcript variant 1, mRNA [NM_020704]	1.72404	9.58566	RENBP
NM_006933	SLC5A3	NM_006933 || SLC5A3 || Homo sapiens solute carrier family 5 (sodium/myo-inositol cotransporter), member 3 (SLC5A3), mRNA [NM_006933]	1.71885	9.92351	SYT7
lnc-FOXL1-2:3	lnc-FOXL1-2	lnc-FOXL1-2:3 || lnc-FOXL1-2 || LNCipedia lincRNA (lnc-FOXL1-2), lincRNA [lnc-FOXL1-2:3]	1.71432	8.83092	lnc-SAA2-2
NM_001661	ARL4D	NM_001661 || ARL4D || Homo sapiens ADP-ribosylation factor-like 4D (ARL4D), mRNA [NM_001661]	1.7094	9.45468	NDRG1
ENST00000527983		ENST00000527983 || || heat shock 70kDa protein 8 [Source:HGNC Symbol;Acc:HGNC:5241] [ENST00000527983]	1.70903	7.31902	BARX1
NM_024060	AHNAK	NM_024060 || AHNAK || Homo sapiens AHNAK nucleoprotein (AHNAK), transcript variant 2, mRNA [NM_024060]	1.70423	8.67958	NOG
NR_027249	GNN	NR_027249 || GNN || Homo sapiens Grp94 neighboring nucleotidase pseudogene (GNN), non-coding RNA [NR_027249]	1.69524	7.19224	CERS1
NM_001289	CLIC2	NM_001289 || CLIC2 || Homo sapiens chloride intracellular channel 2 (CLIC2), mRNA [NM_001289]	1.69515	7.91737	UPP1
NM_144683	DHRS13	NM_144683 || DHRS13 || Homo sapiens dehydrogenase/reductase (SDR family) member 13 (DHRS13), mRNA [NM_144683]	1.69139	9.53007	EMP1
A_33_P3407049		A_33_P3407049 || unmapped	1.69062	8.7807	STEAP1
NM_002129	HMGB2	NM_002129 || HMGB2 || Homo sapiens high mobility group box 2 (HMGB2), transcript variant 1, mRNA [NM_002129]	1.68988	9.64574	AGT
NM_000100	CSTB	NM_000100 || CSTB || Homo sapiens cystatin B (stefin B) (CSTB), mRNA [NM_000100]	1.68899	8.15891	PLIN2
NR_108081	LINC01176	NR_108081 || LINC01176 || Homo sapiens long intergenic non-protein coding RNA 1176 (LINC01176), long non-coding RNA [NR_108081]	1.6848	9.58375	DHRS13
NM_000029	AGT	NM_000029 || AGT || Homo sapiens angiotensinogen (serpin peptidase inhibitor, clade A, member 8) (AGT), mRNA [NM_000029]	1.68085	7.96748	HMGB2
NM_016952	CDON	NM_016952 || CDON || Homo sapiens cell adhesion associated, oncogene regulated (CDON), transcript variant 2, mRNA [NM_016952]	1.68023	7.1947	CSTB
NM_006096	NDRG1	NM_006096 || NDRG1 || Homo sapiens N-myc downstream regulated 1 (NDRG1), transcript variant 2, mRNA [NM_006096]	1.67871	8.52189	JRK
NM_001037537	PHYH	NM_001037537 || PHYH || Homo sapiens phytanoyl-CoA 2-hydroxylase (PHYH), transcript variant 2, mRNA [NM_001037537]	1.66934	8.71535	PHYH
NM_001276318	PPP1R3E	NM_001276318 || PPP1R3E || Homo sapiens protein phosphatase 1, regulatory subunit 3E (PPP1R3E), mRNA [NM_001276318]	1.66849	9.20541	LAMA1
ENST00000406451	HDAC9	ENST00000406451 || HDAC9 || histone deacetylase 9 [Source:HGNC Symbol;Acc:HGNC:14065] [ENST00000406451]	1.66647	9.53007	SLC2A1
NM_001136137	RPL28	NM_001136137 || RPL28 || Homo sapiens ribosomal protein L28 (RPL28), transcript variant 5, mRNA [NM_001136137]	1.65754	8.15548	LINC01176
NM_001287426	UPP1	NM_001287426 || UPP1 || Homo sapiens uridine phosphorylase 1 (UPP1), transcript variant 3, mRNA [NM_001287426]	1.65722	8.7807	FADS1
lnc-AKIP1-3:1	lnc-AKIP1-3	lnc-AKIP1-3:1 || lnc-AKIP1-3 || LNCipedia lincRNA (lnc-AKIP1-3), lincRNA [lnc-AKIP1-3:1]	1.65036	8.26157	AHNAK
NM_005450	NOG	NM_005450 || NOG || Homo sapiens noggin (NOG), mRNA [NM_005450]	1.64787	7.01085	SLC37A2
NM_138732	NRXN2	NM_138732 || NRXN2 || Homo sapiens neurexin 2 (NRXN2), transcript variant alpha-2, mRNA [NM_138732]	1.64524	8.71535	ARL4D
ENST00000585503	JRK	ENST00000585503 || JRK || Jrk homolog (mouse) [Source:HGNC Symbol;Acc:HGNC:6199] [ENST00000585503]	1.643	8.60973	LOC101929947
NM_001423	EMP1	NM_001423 || EMP1 || Homo sapiens epithelial membrane protein 1 (EMP1), mRNA [NM_001423]	1.6356	9.64574	SLC5A3
NM_198207	CERS1	NM_198207 || CERS1 || Homo sapiens ceramide synthase 1 (CERS1), transcript variant 2, mRNA [NM_198207]	1.63522	7.78478	FAM179A
ENST00000434540		ENST00000434540 || || Unknown	1.6169	8.15548	MT1M
NM_003396	WNT9B	NM_003396 || WNT9B || Homo sapiens wingless-type MMTV integration site family, member 9B (WNT9B), mRNA [NM_003396]	1.61118	6.34315	CLIC2
ENST00000426282	NUP50-AS1	ENST00000426282 || NUP50-AS1 || NUP50 antisense RNA 1 (head to head) [Source:HGNC Symbol;Acc:HGNC:50502] [ENST00000426282]	1.61002	8.83092	CRYM
NR_027049	ZNF788	NR_027049 || ZNF788 || Homo sapiens zinc finger family member 788 (ZNF788), non-coding RNA [NR_027049]	1.60641	8.60973	ZNF788
ENST00000451149		ENST00000451149 || || Unknown	1.6052	8.6548	MYLIP
lnc-PRELID2-1:2	lnc-PRELID2-1	lnc-PRELID2-1:2 || lnc-PRELID2-1 || LNCipedia lincRNA (lnc-PRELID2-1), lincRNA [lnc-PRELID2-1:2]	1.59521	7.53642	GM2A
NM_025130	HKDC1	NM_025130 || HKDC1 || Homo sapiens hexokinase domain containing 1 (HKDC1), mRNA [NM_025130]	1.59403	9.41063	PDCD6IP
NM_006516	SLC2A1	NM_006516 || SLC2A1 || Homo sapiens solute carrier family 2 (facilitated glucose transporter), member 1 (SLC2A1), mRNA [NM_006516]	1.59164	8.66812	lnc-LDLRAP1-1
NM_001303099	HIP1R	NM_001303099 || HIP1R || Homo sapiens huntingtin interacting protein 1 related (HIP1R), transcript variant 3, mRNA [NM_001303099]	1.58703	9.53007	NPC2
NM_024711	GIMAP6	NM_024711 || GIMAP6 || Homo sapiens GTPase, IMAP family member 6 (GIMAP6), transcript variant 1, mRNA [NM_024711]	1.58604	8.75597	RPL28
NR_027655	BACH1	NR_027655 || BACH1 || Homo sapiens BTB and CNC homology 1, basic leucine zipper transcription factor 1 (BACH1), transcript variant t, non-coding RNA [NR_027655]	1.57926	8.67771	MYBPH
NM_013402	FADS1	NM_013402 || FADS1 || Homo sapiens fatty acid desaturase 1 (FADS1), mRNA [NM_013402]	1.57907	7.8472	CYP1B1
lnc-ZBTB25-1:1	lnc-ZBTB25-1	lnc-ZBTB25-1:1 || lnc-ZBTB25-1 || Homo sapiens cDNA FLJ40004 fis, clone STOMA2004194. [AK097323]	1.57675	7.87038	UBE3D
NM_001287428	UPP1	NM_001287428 || UPP1 || Homo sapiens uridine phosphorylase 1 (UPP1), transcript variant 4, mRNA [NM_001287428]	1.57614	8.46734	HIST1H2BO
NM_198277	SLC37A2	NM_198277 || SLC37A2 || Homo sapiens solute carrier family 37 (glucose-6-phosphate transporter), member 2 (SLC37A2), transcript variant 1, mRNA [NM_198277]	1.574	9.64574	PDGFRA
NM_199280	FAM179A	NM_199280 || FAM179A || Homo sapiens family with sequence similarity 179, member A (FAM179A), mRNA [NM_199280]	1.57233	8.64813	HIST1H2BH
lnc-LDLRAP1-1:2	lnc-LDLRAP1-1	lnc-LDLRAP1-1:2 || lnc-LDLRAP1-1 || PREDICTED: Homo sapiens low density lipoprotein receptor adaptor protein 1 (LDLRAP1), transcript variant X3, mRNA [XM_006710560]	1.56128	7.53642	HIST1H2BC
NM_182639	HPS1	NM_182639 || HPS1 || Homo sapiens Hermansky-Pudlak syndrome 1 (HPS1), transcript variant 3, mRNA [NM_182639]	1.55885	7.47979	lnc-SRPX2-1
NM_198566	C5orf34	NM_198566 || C5orf34 || Homo sapiens chromosome 5 open reading frame 34 (C5orf34), mRNA [NM_198566]	1.55713	9.45468	XAF1
lnc-BCAR1-1:1	lnc-BCAR1-1	lnc-BCAR1-1:1 || lnc-BCAR1-1 || LNCipedia lincRNA (lnc-BCAR1-1), lincRNA [lnc-BCAR1-1:1]	1.54779	7.87038	PIK3IP1
NM_005559	LAMA1	NM_005559 || LAMA1 || Homo sapiens laminin, alpha 1 (LAMA1), mRNA [NM_005559]	1.54568	7.53642	LRRN3
NM_020311	ACKR3	NM_020311 || ACKR3 || Homo sapiens atypical chemokine receptor 3 (ACKR3), mRNA [NM_020311]	1.54565	7.96748	ASXL3
TCONS_l2_00021387	XLOC_l2_011350	TCONS_l2_00021387 || XLOC_l2_011350 || BROAD Institute lincRNA (XLOC_l2_011350), lincRNA [TCONS_l2_00021387]	1.54555	9.4137	TAF9B
NM_004997	MYBPH	NM_004997 || MYBPH || Homo sapiens myosin binding protein H (MYBPH), mRNA [NM_004997]	1.54119	9.73556	SHF
lnc-HOXC4-4:4	lnc-HOXC4-4	lnc-HOXC4-4:4 || lnc-HOXC4-4 || LNCipedia lincRNA (lnc-HOXC4-4), lincRNA [lnc-HOXC4-4:4]	1.53996	8.67771	FBXL22
NM_006212	PFKFB2	NM_006212 || PFKFB2 || Homo sapiens 6-phosphofructo-2-kinase/fructose-2,6-biphosphatase 2 (PFKFB2), transcript variant 1, mRNA [NM_006212]	1.53904	8.71535	ZNF561-AS1
NM_176870	MT1M	NM_176870 || MT1M || Homo sapiens metallothionein 1M (MT1M), mRNA [NM_176870]	1.53528	9.543	C11orf96
NM_006432	NPC2	NM_006432 || NPC2 || Homo sapiens Niemann-Pick disease, type C2 (NPC2), mRNA [NM_006432]	1.5352	7.1596	BMP6
NM_000916	OXTR	NM_000916 || OXTR || Homo sapiens oxytocin receptor (OXTR), mRNA [NM_000916]	1.53289	8.83092	LOC285178
lnc-GLI2-4:3	lnc-GLI2-4	lnc-GLI2-4:3 || lnc-GLI2-4 || LNCipedia lincRNA (lnc-GLI2-4), lincRNA [lnc-GLI2-4:3]	1.5322	8.67771	VLDLR-AS1
NM_015508	TIPARP	NM_015508 || TIPARP || Homo sapiens TCDD-inducible poly(ADP-ribose) polymerase (TIPARP), transcript variant 2, mRNA [NM_015508]	1.53067	6.34315	SMOC1
NM_001252065	SYT7	NM_001252065 || SYT7 || Homo sapiens synaptotagmin VII (SYT7), transcript variant 1, mRNA [NM_001252065]	1.53034	8.03805	MTUS1
lnc-GDF5-1:2	lnc-GDF5-1	lnc-GDF5-1:2 || lnc-GDF5-1 || LNCipedia lincRNA (lnc-GDF5-1), lincRNA [lnc-GDF5-1:2]	1.53012	7.53385	TYRP1
A_33_P3317460		A_33_P3317460 || unmapped	1.52831	8.67771	INHBE
NR_003288	LOC729603	NR_003288 || LOC729603 || Homo sapiens calcineurin-like EF-hand protein 1 pseudogene (LOC729603), non-coding RNA [NR_003288]	1.52362	9.543	HIST1H2AC
THC2685060		THC2685060 || || Unknown	1.52235	7.36624	SYT1
NM_004827	ABCG2	NM_004827 || ABCG2 || Homo sapiens ATP-binding cassette, sub-family G (WHITE), member 2 (Junior blood group) (ABCG2), transcript variant 1, mRNA [NM_004827]	1.52207	7.66465	EID3
ENST00000438217		ENST00000438217 || || Unknown	1.52011	8.68736	lnc-SEMA6C-1
NM_015379	BRI3	NM_015379 || BRI3 || Homo sapiens brain protein I3 (BRI3), transcript variant 1, mRNA [NM_015379]	1.52005	8.5224	PDK4
NM_013262	MYLIP	NM_013262 || MYLIP || Homo sapiens myosin regulatory light chain interacting protein (MYLIP), mRNA [NM_013262]	1.52	7.61179
ENST00000380464	PLIN2	ENST00000380464 || PLIN2 || perilipin 2 [Source:HGNC Symbol;Acc:HGNC:248] [ENST00000380464]	1.51958	6.13854
NM_006145	DNAJB1	NM_006145 || DNAJB1 || Homo sapiens DnaJ (Hsp40) homolog, subfamily B, member 1 (DNAJB1), transcript variant 1, mRNA [NM_006145]	1.51861	9.64574
lnc-TMEM18-5:1	lnc-TMEM18-5	lnc-TMEM18-5:1 || lnc-TMEM18-5 || LNCipedia lincRNA (lnc-TMEM18-5), lincRNA [lnc-TMEM18-5:1]	1.51624	9.45468
lnc-FGF8-1:2	lnc-FGF8-1	lnc-FGF8-1:2 || lnc-FGF8-1 || LNCipedia lincRNA (lnc-FGF8-1), lincRNA [lnc-FGF8-1:2]	1.51423	9.42849
NM_000405	GM2A	NM_000405 || GM2A || Homo sapiens GM2 ganglioside activator (GM2A), transcript variant 1, mRNA [NM_000405]	1.51281	7.8472
NM_000104	CYP1B1	NM_000104 || CYP1B1 || Homo sapiens cytochrome P450, family 1, subfamily B, polypeptide 1 (CYP1B1), mRNA [NM_000104]	1.51071	7.85343
NR_110908	LOC101927272	NR_110908 || LOC101927272 || Homo sapiens uncharacterized LOC101927272 (LOC101927272), long non-coding RNA [NR_110908]	1.51046	9.20541
ENST00000503942	UBE3D	ENST00000503942 || UBE3D || ubiquitin protein ligase E3D [Source:HGNC Symbol;Acc:HGNC:21381] [ENST00000503942]	1.5093	9.4137
XR_251219	LOC101929947	XR_251219 || LOC101929947 || PREDICTED: Homo sapiens uncharacterized LOC101929947 (LOC101929947), transcript variant X3, ncRNA [XR_251219]	1.5078	7.89271
NM_014427	CPNE7	NM_014427 || CPNE7 || Homo sapiens copine VII (CPNE7), transcript variant 2, mRNA [NM_014427]	1.50681	7.61179
lnc-C21orf58-1:1	lnc-C21orf58-1	lnc-C21orf58-1:1 || lnc-C21orf58-1 || Homo sapiens cDNA FLJ45665 fis, clone CTONG2027959. [AK127572]	1.50479	7.4521
NM_004419	DUSP5	NM_004419 || DUSP5 || Homo sapiens dual specificity phosphatase 5 (DUSP5), mRNA [NM_004419]	1.50206	7.99789
NM_006206	PDGFRA	NM_006206 || PDGFRA || Homo sapiens platelet-derived growth factor receptor, alpha polypeptide (PDGFRA), mRNA [NM_006206]	0.665592	8.28019
NM_003526	HIST1H2BC	NM_003526 || HIST1H2BC || Homo sapiens histone cluster 1, H2bc (HIST1H2BC), mRNA [NM_003526]	0.665292	8.83419
NM_138356	SHF	NM_138356 || SHF || Homo sapiens Src homology 2 domain containing F (SHF), transcript variant 2, mRNA [NM_138356]	0.664059	7.65683
NR_122038	ZNF561-AS1	NR_122038 || ZNF561-AS1 || Homo sapiens ZNF561 antisense RNA 1 (head to head) (ZNF561-AS1), long non-coding RNA [NR_122038]	0.656779	8.67771
NM_020652	ZNF286A	NM_020652 || ZNF286A || Homo sapiens zinc finger protein 286A (ZNF286A), transcript variant 1, mRNA [NM_020652]	0.655923	8.74511
lnc-CHADL-1:2	lnc-CHADL-1	lnc-CHADL-1:2 || lnc-CHADL-1 || LNCipedia lincRNA (lnc-CHADL-1), lincRNA [lnc-CHADL-1:2]	0.654606	9.53007
NM_173801	OOSP2	NM_173801 || OOSP2 || Homo sapiens oocyte secreted protein 2 (OOSP2), mRNA [NM_173801]	0.654071	8.15891
NM_003524	HIST1H2BH	NM_003524 || HIST1H2BH || Homo sapiens histone cluster 1, H2bh (HIST1H2BH), mRNA [NM_003524]	0.653425	9.53007
AK091571	LOC285178	AK091571 || LOC285178 || Homo sapiens cDNA FLJ34252 fis, clone FCBBF5000061. [AK091571]	0.653205	8.74511
NM_012367	OR2B6	NM_012367 || OR2B6 || Homo sapiens olfactory receptor, family 2, subfamily B, member 6 (OR2B6), mRNA [NM_012367]	0.650183	8.15891
NR_026998	LOC91450	NR_026998 || LOC91450 || Homo sapiens uncharacterized LOC91450 (LOC91450), long non-coding RNA [NR_026998]	0.647073	8.60973
NM_003527	HIST1H2BO	NM_003527 || HIST1H2BO || Homo sapiens histone cluster 1, H2bo (HIST1H2BO), mRNA [NM_003527]	0.646053	9.38088
lnc-DENR-1:1	lnc-DENR-1	lnc-DENR-1:1 || lnc-DENR-1 || LNCipedia lincRNA (lnc-DENR-1), lincRNA [lnc-DENR-1:1]	0.638258	8.83092
NM_203373	FBXL22	NM_203373 || FBXL22 || Homo sapiens F-box and leucine-rich repeat protein 22 (FBXL22), mRNA [NM_203373]	0.635602	8.15891
NM_017523	XAF1	NM_017523 || XAF1 || Homo sapiens XIAP associated factor 1 (XAF1), transcript variant 1, mRNA [NM_017523]	0.62886	8.60973
lnc-ZNF345-1:1	lnc-ZNF345-1	lnc-ZNF345-1:1 || lnc-ZNF345-1 || Homo sapiens cDNA FLJ37005 fis, clone BRACE2009122. [AK094324]	0.625787	5.43699
AK130540	LOC100506947	AK130540 || LOC100506947 || Homo sapiens cDNA FLJ27030 fis, clone SLV07741. [AK130540]	0.623683	8.83092
NM_001178133	SUFU	NM_001178133 || SUFU || Homo sapiens suppressor of fused homolog (Drosophila) (SUFU), transcript variant 2, mRNA [NM_001178133]	0.621495	9.56465
NM_005241	MECOM	NM_005241 || MECOM || Homo sapiens MDS1 and EVI1 complex locus (MECOM), transcript variant 2, mRNA [NM_005241]	0.6153	6.7396
NM_000962	PTGS1	NM_000962 || PTGS1 || Homo sapiens prostaglandin-endoperoxide synthase 1 (prostaglandin G/H synthase and cyclooxygenase) (PTGS1), transcript variant 1, mRNA [NM_000962]	0.607099	8.96849
NM_001243722	TP53TG3D	NM_001243722 || TP53TG3D || Homo sapiens TP53 target 3D (TP53TG3D), transcript variant 1, mRNA [NM_001243722]	0.601785	7.63017
NM_031479	INHBE	NM_031479 || INHBE || Homo sapiens inhibin, beta E (INHBE), mRNA [NM_031479]	0.598588	8.83092
NR_015375	VLDLR-AS1	NR_015375 || VLDLR-AS1 || Homo sapiens VLDLR antisense RNA 1 (VLDLR-AS1), long non-coding RNA [NR_015375]	0.59233	9.46158
NM_015975	TAF9B	NM_015975 || TAF9B || Homo sapiens TAF9B RNA polymerase II, TATA box binding protein (TBP)-associated factor, 31kDa (TAF9B), mRNA [NM_015975]	0.585658	8.41439
AF006514	CHD2	AF006514 || CHD2 || Homo sapiens CHD2 mRNA, complete cds. [AF006514]	0.585052	8.51066
NM_001145033	C11orf96	NM_001145033 || C11orf96 || Homo sapiens chromosome 11 open reading frame 96 (C11orf96), mRNA [NM_001145033]	0.584469	9.53007
NM_002497	NEK2	NM_002497 || NEK2 || Homo sapiens NIMA-related kinase 2 (NEK2), transcript variant 1, mRNA [NM_002497]	0.575558	7.63017
ENST00000439058	LOC100506098	ENST00000439058 || LOC100506098 || PREDICTED: Homo sapiens uncharacterized LOC100506098 (LOC100506098), transcript variant X3, ncRNA [XR_108746]	0.56587	8.96849
lnc-GARS-4:6	lnc-GARS-4	lnc-GARS-4:6 || lnc-GARS-4 || LNCipedia lincRNA (lnc-GARS-4), lincRNA [lnc-GARS-4:6]	0.562813	7.91884
NM_000550	TYRP1	NM_000550 || TYRP1 || Homo sapiens tyrosinase-related protein 1 (TYRP1), mRNA [NM_000550]	0.559855	7.95067
NM_018334	LRRN3	NM_018334 || LRRN3 || Homo sapiens leucine rich repeat neuronal 3 (LRRN3), transcript variant 3, mRNA [NM_018334]	0.556508	9.42945
NM_022137	SMOC1	NM_022137 || SMOC1 || Homo sapiens SPARC related modular calcium binding 1 (SMOC1), transcript variant 2, mRNA [NM_022137]	0.553734	7.57953
NM_144966	FREM1	NM_144966 || FREM1 || Homo sapiens FRAS1 related extracellular matrix 1 (FREM1), transcript variant 1, mRNA [NM_144966]	0.546585	8.60973
NR_110773	PPP4R1-AS1	NR_110773 || PPP4R1-AS1 || Homo sapiens PPP4R1 antisense RNA 1 (PPP4R1-AS1), transcript variant 1, long non-coding RNA [NR_110773]	0.545258	8.67958
NM_030632	ASXL3	NM_030632 || ASXL3 || Homo sapiens additional sex combs like transcriptional regulator 3 (ASXL3), mRNA [NM_030632]	0.534152	8.41439
NM_001718	BMP6	NM_001718 || BMP6 || Homo sapiens bone morphogenetic protein 6 (BMP6), mRNA [NM_001718]	0.52596	6.91981
lnc-SRPX2-1:1	lnc-SRPX2-1	lnc-SRPX2-1:1 || lnc-SRPX2-1 || Homo sapiens full length insert cDNA clone ZD89B07. [AF086477]	0.523802	9.46158
NM_001303429	PIK3R3	NM_001303429 || PIK3R3 || Homo sapiens phosphoinositide-3-kinase, regulatory subunit 3 (gamma) (PIK3R3), transcript variant 5, mRNA [NM_001303429]	0.51264	8.52189
ENST00000314088	HIST1H2AC	ENST00000314088 || HIST1H2AC || histone cluster 1, H2ac [Source:HGNC Symbol;Acc:HGNC:4733] [ENST00000314088]	0.509701	7.83788
NM_001001924	MTUS1	NM_001001924 || MTUS1 || Homo sapiens microtubule associated tumor suppressor 1 (MTUS1), transcript variant 1, mRNA [NM_001001924]	0.506545	8.5224
NM_052880	PIK3IP1	NM_052880 || PIK3IP1 || Homo sapiens phosphoinositide-3-kinase interacting protein 1 (PIK3IP1), transcript variant 1, mRNA [NM_052880]	0.503403	9.73556
AK127766		AK127766 || || Homo sapiens cDNA FLJ45867 fis, clone OCBBF3003745. [AK127766]	0.502717	7.30731
NM_001008394	EID3	NM_001008394 || EID3 || Homo sapiens EP300 interacting inhibitor of differentiation 3 (EID3), mRNA [NM_001008394]	0.470055	5.43699
NM_006028	HTR3B	NM_006028 || HTR3B || Homo sapiens 5-hydroxytryptamine (serotonin) receptor 3B, ionotropic (HTR3B), mRNA [NM_006028]	0.461262	7.70377
NM_005639	SYT1	NM_005639 || SYT1 || Homo sapiens synaptotagmin I (SYT1), transcript variant 1, mRNA [NM_005639]	0.460074	7.91884
NM_003991	EDNRB	NM_003991 || EDNRB || Homo sapiens endothelin receptor type B (EDNRB), transcript variant 2, mRNA [NM_003991]	0.458701	7.26394
NM_001034852	SMOC1	NM_001034852 || SMOC1 || Homo sapiens SPARC related modular calcium binding 1 (SMOC1), transcript variant 1, mRNA [NM_001034852]	0.448079	6.81652
lnc-SEMA6C-1:1	lnc-SEMA6C-1	lnc-SEMA6C-1:1 || lnc-SEMA6C-1 || LNCipedia lincRNA (lnc-SEMA6C-1), lincRNA [lnc-SEMA6C-1:1]	0.44745	8.52581
NM_002612	PDK4	NM_002612 || PDK4 || Homo sapiens pyruvate dehydrogenase kinase, isozyme 4 (PDK4), mRNA [NM_002612]	0.418381	8.67958

## Sheet: Gr-4B-CB, toxic
NCBI RefSeq	Gene Symbol	NBCI RefSeq || Gene Symbol || Gene Description (total # of significant genes: 1286; 515 up, 771 down)	Normalized Fold (Unlogged)	q-value (%)
NM_001080538	AKR1B15	NM_001080538 || AKR1B15 || Homo sapiens aldo-keto reductase family 1, member B15 (AKR1B15), mRNA [NM_001080538]	6.95084	0
NM_020299	AKR1B10	NM_020299 || AKR1B10 || Homo sapiens aldo-keto reductase family 1, member B10 (aldose reductase) (AKR1B10), mRNA [NM_020299]	6.66743	0
NR_027084	FLJ36000	NR_027084 || FLJ36000 || Homo sapiens uncharacterized FLJ36000 (FLJ36000), long non-coding RNA [NR_027084]	6.47669	5.09647
NM_001040058	SPP1	NM_001040058 || SPP1 || Homo sapiens secreted phosphoprotein 1 (SPP1), transcript variant 1, mRNA [NM_001040058]	5.13331	0
NM_007256	SLCO2B1	NM_007256 || SLCO2B1 || Homo sapiens solute carrier organic anion transporter family, member 2B1 (SLCO2B1), transcript variant 1, mRNA [NM_007256]	4.4763	0
lnc-CORO6-1:1	lnc-CORO6-1	lnc-CORO6-1:1 || lnc-CORO6-1 || Homo sapiens full length insert cDNA clone YW04H08. [AF086010]	4.45665	2.08097
lnc-TPBG-1:1	lnc-TPBG-1	lnc-TPBG-1:1 || lnc-TPBG-1 || LNCipedia lincRNA (lnc-TPBG-1), lincRNA [lnc-TPBG-1:1]	4.07761	1.24511
NM_003786	ABCC3	NM_003786 || ABCC3 || Homo sapiens ATP-binding cassette, sub-family C (CFTR/MRP), member 3 (ABCC3), transcript variant 1, mRNA [NM_003786]	4.03225	0
ENST00000439955		ENST00000439955 || || Unknown	3.66285	0.453256
NR_033752	LOC344887	NR_033752 || LOC344887 || Homo sapiens NmrA-like family domain containing 1 pseudogene (LOC344887), non-coding RNA [NR_033752]	3.58371	0
NM_005382	NEFM	NM_005382 || NEFM || Homo sapiens neurofilament, medium polypeptide (NEFM), transcript variant 1, mRNA [NM_005382]	3.57092	8.7866
lnc-RNF149-2:1	lnc-RNF149-2	lnc-RNF149-2:1 || lnc-RNF149-2 || Homo sapiens cDNA FLJ36224 fis, clone THYMU2000990. [AK093543]	3.54446	9.23036
NM_001353	AKR1C1	NM_001353 || AKR1C1 || Homo sapiens aldo-keto reductase family 1, member C1 (AKR1C1), mRNA [NM_001353]	3.48978	0
NM_001080836	MEIG1	NM_001080836 || MEIG1 || Homo sapiens meiosis/spermiogenesis associated 1 (MEIG1), mRNA [NM_001080836]	3.47393	6.42066
NR_033405	CTSLP8	NR_033405 || CTSLP8 || Homo sapiens cathepsin L pseudogene 8 (CTSLP8), non-coding RNA [NR_033405]	3.46312	0
NM_053044	HTRA3	NM_053044 || HTRA3 || Homo sapiens HtrA serine peptidase 3 (HTRA3), transcript variant 1, mRNA [NM_053044]	3.43644	0
NM_001912	CTSL	NM_001912 || CTSL || Homo sapiens cathepsin L (CTSL), transcript variant 1, mRNA [NM_001912]	3.42591	0
ENST00000454614		ENST00000454614 || || cathepsin L pseudogene 4 [Source:HGNC Symbol;Acc:HGNC:23645] [ENST00000454614]	3.41617	0
lnc-HK2-1:1	lnc-HK2-1	lnc-HK2-1:1 || lnc-HK2-1 || LNCipedia lincRNA (lnc-HK2-1), lincRNA [lnc-HK2-1:1]	3.37165	0
ENST00000496994		ENST00000496994 || || Unknown	3.23224	9.23036
lnc-C22orf26-2:11	lnc-C22orf26-2	lnc-C22orf26-2:11 || lnc-C22orf26-2 || LNCipedia lincRNA (lnc-C22orf26-2), lincRNA [lnc-C22orf26-2:11]	3.17563	8.4009
ENST00000433316		ENST00000433316 || || ribosomal protein L7 pseudogene 34 [Source:HGNC Symbol;Acc:HGNC:36181] [ENST00000433316]	3.13869	5.99377
NM_003474	ADAM12	NM_003474 || ADAM12 || Homo sapiens ADAM metallopeptidase domain 12 (ADAM12), transcript variant 1, mRNA [NM_003474]	3.11542	0
NM_000640	IL13RA2	NM_000640 || IL13RA2 || Homo sapiens interleukin 13 receptor, alpha 2 (IL13RA2), mRNA [NM_000640]	3.07167	0
NM_000475	NR0B1	NM_000475 || NR0B1 || Homo sapiens nuclear receptor subfamily 0, group B, member 1 (NR0B1), mRNA [NM_000475]	3.05864	0
NM_025130	HKDC1	NM_025130 || HKDC1 || Homo sapiens hexokinase domain containing 1 (HKDC1), mRNA [NM_025130]	3.02722	0
NM_000908	NPR3	NM_000908 || NPR3 || Homo sapiens natriuretic peptide receptor 3 (NPR3), transcript variant 2, mRNA [NM_000908]	3.01886	0
NM_139072	DNER	NM_139072 || DNER || Homo sapiens delta/notch-like EGF repeat containing (DNER), mRNA [NM_139072]	3.01873	6.80203
NM_018249	CDK5RAP2	NM_018249 || CDK5RAP2 || Homo sapiens CDK5 regulatory subunit associated protein 2 (CDK5RAP2), transcript variant 1, mRNA [NM_018249]	3.00554	0
NM_003739	AKR1C3	NM_003739 || AKR1C3 || Homo sapiens aldo-keto reductase family 1, member C3 (AKR1C3), transcript variant 1, mRNA [NM_003739]	2.97504	0
NM_001032998	KYNU	NM_001032998 || KYNU || Homo sapiens kynureninase (KYNU), transcript variant 2, mRNA [NM_001032998]	2.92622	0
NM_007193	ANXA10	NM_007193 || ANXA10 || Homo sapiens annexin A10 (ANXA10), mRNA [NM_007193]	2.89298	0.132288
NM_005211	CSF1R	NM_005211 || CSF1R || Homo sapiens colony stimulating factor 1 receptor (CSF1R), transcript variant 1, mRNA [NM_005211]	2.82837	7.30408
ENST00000374313	PTGR1	ENST00000374313 || PTGR1 || prostaglandin reductase 1 [Source:HGNC Symbol;Acc:HGNC:18429] [ENST00000374313]	2.82699	0
ENST00000509524	ZFP42	ENST00000509524 || ZFP42 || ZFP42 zinc finger protein [Source:HGNC Symbol;Acc:HGNC:30949] [ENST00000509524]	2.76158	0
NM_013363	PCOLCE2	NM_013363 || PCOLCE2 || Homo sapiens procollagen C-endopeptidase enhancer 2 (PCOLCE2), mRNA [NM_013363]	2.75801	0
NM_032466	ASPH	NM_032466 || ASPH || Homo sapiens aspartate beta-hydroxylase (ASPH), transcript variant 3, mRNA [NM_032466]	2.75469	0
NM_001216	CA9	NM_001216 || CA9 || Homo sapiens carbonic anhydrase IX (CA9), mRNA [NM_001216]	2.72477	0
NR_037166	LOC100129518	NR_037166 || LOC100129518 || Homo sapiens uncharacterized LOC100129518 (LOC100129518), long non-coding RNA [NR_037166]	2.67875	1.00009
ENST00000449012	LOC101927787	ENST00000449012 || LOC101927787 || Unknown	2.67176	7.58603
ENST00000509709	ARHGAP24	ENST00000509709 || ARHGAP24 || Rho GTPase activating protein 24 [Source:HGNC Symbol;Acc:HGNC:25361] [ENST00000509709]	2.66933	0
lnc-ARRDC3-1:10	lnc-ARRDC3-1	lnc-ARRDC3-1:10 || lnc-ARRDC3-1 || LNCipedia lincRNA (lnc-ARRDC3-1), lincRNA [lnc-ARRDC3-1:10]	2.64822	0
NM_000433	NCF2	NM_000433 || NCF2 || Homo sapiens neutrophil cytosolic factor 2 (NCF2), transcript variant 1, mRNA [NM_000433]	2.63247	0
ENST00000453951	LINC01293	ENST00000453951 || LINC01293 || long intergenic non-protein coding RNA 1293 [Source:HGNC Symbol;Acc:HGNC:50362] [ENST00000453951]	2.62995	0
lnc-C15orf42-1:1	lnc-C15orf42-1	lnc-C15orf42-1:1 || lnc-C15orf42-1 || LNCipedia lincRNA (lnc-C15orf42-1), lincRNA [lnc-C15orf42-1:1]	2.62712	0
NM_080725	SRXN1	NM_080725 || SRXN1 || Homo sapiens sulfiredoxin 1 (SRXN1), mRNA [NM_080725]	2.60173	0
NM_001114357	C4orf47	NM_001114357 || C4orf47 || Homo sapiens chromosome 4 open reading frame 47 (C4orf47), mRNA [NM_001114357]	2.59415	0
lnc-CTNNA2-3:1	lnc-CTNNA2-3	lnc-CTNNA2-3:1 || lnc-CTNNA2-3 || LNCipedia lincRNA (lnc-CTNNA2-3), lincRNA [lnc-CTNNA2-3:1]	2.59036	0
TCONS_l2_00025693	XLOC_l2_013293	TCONS_l2_00025693 || XLOC_l2_013293 || BROAD Institute lincRNA (XLOC_l2_013293), lincRNA [TCONS_l2_00025693]	2.57016	0
NR_001458	MIR155HG	NR_001458 || MIR155HG || Homo sapiens MIR155 host gene (non-protein coding) (MIR155HG), long non-coding RNA [NR_001458]	2.56605	0
NM_003329	TXN	NM_003329 || TXN || Homo sapiens thioredoxin (TXN), transcript variant 1, mRNA [NM_003329]	2.55228	0
NM_001159	AOX1	NM_001159 || AOX1 || Homo sapiens aldehyde oxidase 1 (AOX1), mRNA [NM_001159]	2.55219	0
NM_001242607	NCAM1	NM_001242607 || NCAM1 || Homo sapiens neural cell adhesion molecule 1 (NCAM1), transcript variant 5, mRNA [NM_001242607]	2.53531	8.4009
NM_005951	MT1H	NM_005951 || MT1H || Homo sapiens metallothionein 1H (MT1H), mRNA [NM_005951]	2.48852	0.288555
lnc-ARRDC3-1:6	lnc-ARRDC3-1	lnc-ARRDC3-1:6 || lnc-ARRDC3-1 || LNCipedia lincRNA (lnc-ARRDC3-1), lincRNA [lnc-ARRDC3-1:6]	2.45748	0
ENST00000418546		ENST00000418546 || || microRNA 29b-1 [Source:HGNC Symbol;Acc:HGNC:31619] [ENST00000418546]	2.42608	0
lnc-SUCLA2-4:1	lnc-SUCLA2-4	lnc-SUCLA2-4:1 || lnc-SUCLA2-4 || LNCipedia lincRNA (lnc-SUCLA2-4), lincRNA [lnc-SUCLA2-4:1]	2.41408	4.94107
THC2521366		THC2521366 || || Unknown	2.39459	0.753658
NR_027114	LOC285740	NR_027114 || LOC285740 || Homo sapiens uncharacterized LOC285740 (LOC285740), transcript variant 1, long non-coding RNA [NR_027114]	2.39205	2.66656
NM_001258008	ZCWPW1	NM_001258008 || ZCWPW1 || Homo sapiens zinc finger, CW type with PWWP domain 1 (ZCWPW1), transcript variant 2, mRNA [NM_001258008]	2.38705	7.81615
ENST00000423924	LOC100996557	ENST00000423924 || LOC100996557 || PREDICTED: Homo sapiens uncharacterized LOC100996557 (LOC100996557), ncRNA [XR_158849]	2.34998	4.82419
NM_013402	FADS1	NM_013402 || FADS1 || Homo sapiens fatty acid desaturase 1 (FADS1), mRNA [NM_013402]	2.326	0
lnc-CTD-3080F16.3.1-1:1	lnc-CTD-3080F16.3.1-1	lnc-CTD-3080F16.3.1-1:1 || lnc-CTD-3080F16.3.1-1 || LNCipedia lincRNA (lnc-CTD-3080F16.3.1-1), lincRNA [lnc-CTD-3080F16.3.1-1:1]	2.30357	0.546471
NM_001173989	RABL6	NM_001173989 || RABL6 || Homo sapiens RAB, member RAS oncogene family-like 6 (RABL6), transcript variant 4, mRNA [NM_001173989]	2.29554	2.93491
NM_012212	PTGR1	NM_012212 || PTGR1 || Homo sapiens prostaglandin reductase 1 (PTGR1), transcript variant 2, mRNA [NM_012212]	2.28364	0
ENST00000585503	JRK	ENST00000585503 || JRK || Jrk homolog (mouse) [Source:HGNC Symbol;Acc:HGNC:6199] [ENST00000585503]	2.27598	0
NM_002631	PGD	NM_002631 || PGD || Homo sapiens phosphogluconate dehydrogenase (PGD), mRNA [NM_002631]	2.27175	0
NM_145176	SLC2A12	NM_145176 || SLC2A12 || Homo sapiens solute carrier family 2 (facilitated glucose transporter), member 12 (SLC2A12), mRNA [NM_145176]	2.26449	0
NM_001009991	SYTL3	NM_001009991 || SYTL3 || Homo sapiens synaptotagmin-like 3 (SYTL3), transcript variant 3, mRNA [NM_001009991]	2.25976	0.839754
NM_002610	PDK1	NM_002610 || PDK1 || Homo sapiens pyruvate dehydrogenase kinase, isozyme 1 (PDK1), transcript variant 2, mRNA [NM_002610]	2.25849	0
NM_003469	SCG2	NM_003469 || SCG2 || Homo sapiens secretogranin II (SCG2), mRNA [NM_003469]	2.25016	0
NM_001204375	NPR3	NM_001204375 || NPR3 || Homo sapiens natriuretic peptide receptor 3 (NPR3), transcript variant 1, mRNA [NM_001204375]	2.21615	0
NM_006209	ENPP2	NM_006209 || ENPP2 || Homo sapiens ectonucleotide pyrophosphatase/phosphodiesterase 2 (ENPP2), transcript variant 1, mRNA [NM_006209]	2.20272	0
NM_001002901	FCRLB	NM_001002901 || FCRLB || Homo sapiens Fc receptor-like B (FCRLB), transcript variant 1, mRNA [NM_001002901]	2.19573	4.94107
ENST00000555069	ERO1L	ENST00000555069 || ERO1L || ERO1-like (S. cerevisiae) [Source:HGNC Symbol;Acc:HGNC:13280] [ENST00000555069]	2.19503	0
NM_022361	POPDC3	NM_022361 || POPDC3 || Homo sapiens popeye domain containing 3 (POPDC3), transcript variant 1, mRNA [NM_022361]	2.19375	0
lnc-CPO-1:4	lnc-CPO-1	lnc-CPO-1:4 || lnc-CPO-1 || LNCipedia lincRNA (lnc-CPO-1), lincRNA [lnc-CPO-1:4]	2.19353	4.55297
NR_103549	LUCAT1	NR_103549 || LUCAT1 || Homo sapiens lung cancer associated transcript 1 (non-protein coding) (LUCAT1), transcript variant 2, long non-coding RNA [NR_103549]	2.1868	0.167349
ENST00000501708	LOC102725477	ENST00000501708 || LOC102725477 || Homo sapiens cDNA FLJ43423 fis, clone OCBBF2026981, weakly similar to alpha 1C adrenergic receptor isoform 2. [AK125412]	2.18451	0
lnc-ARHGAP26-4:5	lnc-ARHGAP26-4	lnc-ARHGAP26-4:5 || lnc-ARHGAP26-4 || DKFZp781J0760_r1 781 (synonym: hlcc4) Homo sapiens cDNA clone DKFZp781J0760 5', mRNA sequence [BX646148]	2.17131	0
NM_001297559	HTRA3	NM_001297559 || HTRA3 || Homo sapiens HtrA serine peptidase 3 (HTRA3), transcript variant 2, mRNA [NM_001297559]	2.16206	0
NM_018896	CACNA1G	NM_018896 || CACNA1G || Homo sapiens calcium channel, voltage-dependent, T type, alpha 1G subunit (CACNA1G), transcript variant 1, mRNA [NM_018896]	2.15998	0
NM_000812	GABRB1	NM_000812 || GABRB1 || Homo sapiens gamma-aminobutyric acid (GABA) A receptor, beta 1 (GABRB1), mRNA [NM_000812]	2.15518	0
NM_001134	AFP	NM_001134 || AFP || Homo sapiens alpha-fetoprotein (AFP), mRNA [NM_001134]	2.15151	0
NM_003012	SFRP1	NM_003012 || SFRP1 || Homo sapiens secreted frizzled-related protein 1 (SFRP1), mRNA [NM_003012]	2.14542	0
lnc-SHPRH-2:8	lnc-SHPRH-2	lnc-SHPRH-2:8 || lnc-SHPRH-2 || LNCipedia lincRNA (lnc-SHPRH-2), lincRNA [lnc-SHPRH-2:8]	2.13336	1.12907
NR_104177	FLJ38122	NR_104177 || FLJ38122 || Homo sapiens uncharacterized LOC401289 (FLJ38122), long non-coding RNA [NR_104177]	2.1308	1.15956
NR_028415	LINC00942	NR_028415 || LINC00942 || Homo sapiens long intergenic non-protein coding RNA 942 (LINC00942), long non-coding RNA [NR_028415]	2.12656	0
NM_020142	NDUFA4L2	NM_020142 || NDUFA4L2 || Homo sapiens NADH dehydrogenase (ubiquinone) 1 alpha subcomplex, 4-like 2 (NDUFA4L2), mRNA [NM_020142]	2.12424	0
NR_003347	SNORD115-32	NR_003347 || SNORD115-32 || Homo sapiens small nucleolar RNA, C/D box 115-32 (SNORD115-32), small nucleolar RNA [NR_003347]	2.11448	0
ENST00000440326		ENST00000440326 || || PREDICTED: Homo sapiens uncharacterized LOC101059946 (LOC101059946), misc_RNA [XR_171346]	2.10615	0.331987
NM_012242	DKK1	NM_012242 || DKK1 || Homo sapiens dickkopf WNT signaling pathway inhibitor 1 (DKK1), mRNA [NM_012242]	2.10522	0
A_21_P0013988		A_21_P0013988 || unmapped	2.10462	0.23968
NM_130830	LRRC15	NM_130830 || LRRC15 || Homo sapiens leucine rich repeat containing 15 (LRRC15), transcript variant 2, mRNA [NM_130830]	2.10322	1.09198
lnc-C16orf72-5:1	lnc-C16orf72-5	lnc-C16orf72-5:1 || lnc-C16orf72-5 || LNCipedia lincRNA (lnc-C16orf72-5), lincRNA [lnc-C16orf72-5:1]	2.09014	7.81615
NM_003662	PIR	NM_003662 || PIR || Homo sapiens pirin (iron-binding nuclear protein) (PIR), transcript variant 1, mRNA [NM_003662]	2.08575	0
NM_004318	ASPH	NM_004318 || ASPH || Homo sapiens aspartate beta-hydroxylase (ASPH), transcript variant 1, mRNA [NM_004318]	2.08399	0
THC2780703		THC2780703 || || Q9P1R7_HUMAN (Q9P1R7) HDCMB45P (Fragment), partial (19%) [THC2780703]	2.08244	3.68079
NM_001975	ENO2	NM_001975 || ENO2 || Homo sapiens enolase 2 (gamma, neuronal) (ENO2), mRNA [NM_001975]	2.08219	0
NM_003256	TIMP4	NM_003256 || TIMP4 || Homo sapiens TIMP metallopeptidase inhibitor 4 (TIMP4), mRNA [NM_003256]	2.08201	0
lnc-CEP19-1:1	lnc-CEP19-1	lnc-CEP19-1:1 || lnc-CEP19-1 || LNCipedia lincRNA (lnc-CEP19-1), lincRNA [lnc-CEP19-1:1]	2.07965	1.43927
NM_006000	TUBA4A	NM_006000 || TUBA4A || Homo sapiens tubulin, alpha 4a (TUBA4A), transcript variant 1, mRNA [NM_006000]	2.07615	0
NM_003116	SPAG4	NM_003116 || SPAG4 || Homo sapiens sperm associated antigen 4 (SPAG4), mRNA [NM_003116]	2.07414	0
NM_005434	MALL	NM_005434 || MALL || Homo sapiens mal, T-cell differentiation protein-like (MALL), mRNA [NM_005434]	2.0741	0.150883
TCONS_l2_00015391	XLOC_l2_007395	TCONS_l2_00015391 || XLOC_l2_007395 || BROAD Institute lincRNA (XLOC_l2_007395), lincRNA [TCONS_l2_00015391]	2.06997	4.55297
NR_120648	LOC101928994	NR_120648 || LOC101928994 || Homo sapiens uncharacterized LOC101928994 (LOC101928994), long non-coding RNA [NR_120648]	2.0698	0.411161
NM_001628	AKR1B1	NM_001628 || AKR1B1 || Homo sapiens aldo-keto reductase family 1, member B1 (aldose reductase) (AKR1B1), mRNA [NM_001628]	2.06253	0
NM_152399	TMEM155	NM_152399 || TMEM155 || Homo sapiens transmembrane protein 155 (TMEM155), mRNA [NM_152399]	2.06148	0.546471
NM_001039792	HRCT1	NM_001039792 || HRCT1 || Homo sapiens histidine rich carboxyl terminus 1 (HRCT1), mRNA [NM_001039792]	2.04653	0.247577
lnc-MAFB-1:1	lnc-MAFB-1	lnc-MAFB-1:1 || lnc-MAFB-1 || LNCipedia lincRNA (lnc-MAFB-1), lincRNA [lnc-MAFB-1:1]	2.04601	0.143671
NM_001478	B4GALNT1	NM_001478 || B4GALNT1 || Homo sapiens beta-1,4-N-acetyl-galactosaminyl transferase 1 (B4GALNT1), transcript variant 1, mRNA [NM_001478]	2.0451	0
NM_033518	SLC38A5	NM_033518 || SLC38A5 || Homo sapiens solute carrier family 38, member 5 (SLC38A5), mRNA [NM_033518]	2.03752	0
lnc-NNAT-1:1	lnc-NNAT-1	lnc-NNAT-1:1 || lnc-NNAT-1 || LNCipedia lincRNA (lnc-NNAT-1), lincRNA [lnc-NNAT-1:1]	2.02777	7.02514
NR_033407	CTSLP2	NR_033407 || CTSLP2 || Homo sapiens cathepsin L pseudogene 2 (CTSLP2), non-coding RNA [NR_033407]	2.01867	0
NM_173508	SLC35F3	NM_173508 || SLC35F3 || Homo sapiens solute carrier family 35, member F3 (SLC35F3), transcript variant 1, mRNA [NM_173508]	2.01518	0
NM_054114	TAGAP	NM_054114 || TAGAP || Homo sapiens T-cell activation RhoGTPase activating protein (TAGAP), transcript variant 2, mRNA [NM_054114]	2.01338	3.17572
lnc-ARID1B-2:2	lnc-ARID1B-2	lnc-ARID1B-2:2 || lnc-ARID1B-2 || LNCipedia lincRNA (lnc-ARID1B-2), lincRNA [lnc-ARID1B-2:2]	2.00576	1.105
NM_004507	HUS1	NM_004507 || HUS1 || Homo sapiens HUS1 checkpoint homolog (S. pombe) (HUS1), transcript variant 1, mRNA [NM_004507]	2.00327	2.29913
NM_000903	NQO1	NM_000903 || NQO1 || Homo sapiens NAD(P)H dehydrogenase, quinone 1 (NQO1), transcript variant 1, mRNA [NM_000903]	1.9805	0
NM_019121	PPP1R37	NM_019121 || PPP1R37 || Homo sapiens protein phosphatase 1, regulatory subunit 37 (PPP1R37), mRNA [NM_019121]	1.97469	1.93466
NM_021614	KCNN2	NM_021614 || KCNN2 || Homo sapiens potassium channel, calcium activated intermediate/small conductance subfamily N alpha, member 2 (KCNN2), transcript variant 1, mRNA [NM_021614]	1.9666	0
NM_052839	PANX2	NM_052839 || PANX2 || Homo sapiens pannexin 2 (PANX2), transcript variant 1, mRNA [NM_052839]	1.96584	0.288555
ENST00000571113		ENST00000571113 || || Q9RWU3_DEIRA (Q9RWU3) Sporulation protein SpoIID-related protein, partial (4%) [THC2653215]	1.96268	0
NM_001261445	TXNRD1	NM_001261445 || TXNRD1 || Homo sapiens thioredoxin reductase 1 (TXNRD1), transcript variant 6, mRNA [NM_001261445]	1.96139	0
ENST00000380464	PLIN2	ENST00000380464 || PLIN2 || perilipin 2 [Source:HGNC Symbol;Acc:HGNC:248] [ENST00000380464]	1.96134	0.16442
lnc-GRID2IP-1:1	lnc-GRID2IP-1	lnc-GRID2IP-1:1 || lnc-GRID2IP-1 || Synthetic construct Homo sapiens gateway clone IMAGE:100019028 3' read ZDHHC4 mRNA. [CU674621]	1.95589	7.81615
lnc-NFAT5-1:1	lnc-NFAT5-1	lnc-NFAT5-1:1 || lnc-NFAT5-1 || Q4RE65_TETNG (Q4RE65) Chromosome 2 SCAF15135, whole genome shotgun sequence. (Fragment), partial (3%) [THC2561515]	1.94919	1.12907
NM_032413	C15orf48	NM_032413 || C15orf48 || Homo sapiens chromosome 15 open reading frame 48 (C15orf48), transcript variant 2, mRNA [NM_032413]	1.94356	0.331987
NM_014178	STXBP6	NM_014178 || STXBP6 || Homo sapiens syntaxin binding protein 6 (amisyn) (STXBP6), mRNA [NM_014178]	1.93992	0
NM_007210	GALNT6	NM_007210 || GALNT6 || Homo sapiens polypeptide N-acetylgalactosaminyltransferase 6 (GALNT6), mRNA [NM_007210]	1.93982	0
NM_017415	KLHL3	NM_017415 || KLHL3 || Homo sapiens kelch-like family member 3 (KLHL3), transcript variant 1, mRNA [NM_017415]	1.93823	0.323878
NM_001005463	EBF3	NM_001005463 || EBF3 || Homo sapiens early B-cell factor 3 (EBF3), mRNA [NM_001005463]	1.93764	0
NM_007361	NID2	NM_007361 || NID2 || Homo sapiens nidogen 2 (osteonidogen) (NID2), mRNA [NM_007361]	1.93397	0
AK123383	LOC642648	AK123383 || LOC642648 || Homo sapiens cDNA FLJ41389 fis, clone BRCAN2024563. [AK123383]	1.93252	7.81615
NR_125344	LOC400706	NR_125344 || LOC400706 || Homo sapiens uncharacterized LOC400706 (LOC400706), long non-coding RNA [NR_125344]	1.93209	8.7866
TCONS_l2_00025960	XLOC_l2_013458	TCONS_l2_00025960 || XLOC_l2_013458 || BROAD Institute lincRNA (XLOC_l2_013458), lincRNA [TCONS_l2_00025960]	1.92903	0
NM_001012985	COA6	NM_001012985 || COA6 || Homo sapiens cytochrome c oxidase assembly factor 6 (COA6), transcript variant 1, mRNA [NM_001012985]	1.92445	0
lnc-GPR137C-1:1	lnc-GPR137C-1	lnc-GPR137C-1:1 || lnc-GPR137C-1 || LNCipedia lincRNA (lnc-GPR137C-1), lincRNA [lnc-GPR137C-1:1]	1.92361	0
NM_002526	NT5E	NM_002526 || NT5E || Homo sapiens 5'-nucleotidase, ecto (CD73) (NT5E), transcript variant 1, mRNA [NM_002526]	1.91834	0
NM_000637	GSR	NM_000637 || GSR || Homo sapiens glutathione reductase (GSR), transcript variant 1, mRNA [NM_000637]	1.91549	0
NM_000804	FOLR3	NM_000804 || FOLR3 || Homo sapiens folate receptor 3 (gamma) (FOLR3), mRNA [NM_000804]	1.91077	0
ENST00000435729		ENST00000435729 || || fatty acid binding protein 5 pseudogene 10 [Source:HGNC Symbol;Acc:HGNC:31066] [ENST00000435729]	1.90918	0.143671
NM_002422	MMP3	NM_002422 || MMP3 || Homo sapiens matrix metallopeptidase 3 (stromelysin 1, progelatinase) (MMP3), mRNA [NM_002422]	1.9082	0
AL832677	N4BP2L1	AL832677 || N4BP2L1 || Homo sapiens mRNA; cDNA DKFZp313I0517 (from clone DKFZp313I0517) [AL832677]	1.90631	5.09647
NM_199367	SPG7	NM_199367 || SPG7 || Homo sapiens spastic paraplegia 7 (pure and complicated autosomal recessive) (SPG7), transcript variant 2, mRNA [NM_199367]	1.90517	7.30408
ENST00000428035		ENST00000428035 || || AF311602 tandem FYVE fingers-1 protein {Homo sapiens} (exp=-1; wgp=0; cg=0), partial (6%) [THC2689329]	1.90151	0
NM_001236	CBR3	NM_001236 || CBR3 || Homo sapiens carbonyl reductase 3 (CBR3), mRNA [NM_001236]	1.90143	0
NM_153697	ANKRD44	NM_153697 || ANKRD44 || Homo sapiens ankyrin repeat domain 44 (ANKRD44), transcript variant B, mRNA [NM_153697]	1.89847	0.243171
NM_199280	FAM179A	NM_199280 || FAM179A || Homo sapiens family with sequence similarity 179, member A (FAM179A), mRNA [NM_199280]	1.89807	0
ENST00000431702		ENST00000431702 || || phosphoglycerate kinase 1, pseudogene 2 [Source:HGNC Symbol;Acc:HGNC:8899] [ENST00000431702]	1.8964	0
NM_153361	NIM1K	NM_153361 || NIM1K || Homo sapiens NIM1 serine/threonine protein kinase (NIM1K), transcript variant 1, mRNA [NM_153361]	1.88345	0.132288
lnc-HSPA4-4:1	lnc-HSPA4-4	lnc-HSPA4-4:1 || lnc-HSPA4-4 || LNCipedia lincRNA (lnc-HSPA4-4), lincRNA [lnc-HSPA4-4:1]	1.8828	6.80203
NM_002165	ID1	NM_002165 || ID1 || Homo sapiens inhibitor of DNA binding 1, dominant negative helix-loop-helix protein (ID1), transcript variant 1, mRNA [NM_002165]	1.87551	0
NR_034115	STXBP5-AS1	NR_034115 || STXBP5-AS1 || Homo sapiens STXBP5 antisense RNA 1 (STXBP5-AS1), long non-coding RNA [NR_034115]	1.86685	0.145338
lnc-DUSP4-3:1	lnc-DUSP4-3	lnc-DUSP4-3:1 || lnc-DUSP4-3 || LNCipedia lincRNA (lnc-DUSP4-3), lincRNA [lnc-DUSP4-3:1]	1.86144	2.24564
lnc-RGL4-4:5	lnc-RGL4-4	lnc-RGL4-4:5 || lnc-RGL4-4 || LNCipedia lincRNA (lnc-RGL4-4), lincRNA [lnc-RGL4-4:5]	1.8394	0.546471
NR_125792	LINC01291	NR_125792 || LINC01291 || Homo sapiens long intergenic non-protein coding RNA 1291 (LINC01291), long non-coding RNA [NR_125792]	1.83863	0.150883
ENST00000414130		ENST00000414130 || || high mobility group AT-hook 1 pseudogene 8 (functional) [Source:HGNC Symbol;Acc:HGNC:39183] [ENST00000414130]	1.83733	0.252147
ENST00000550766	CRADD	ENST00000550766 || CRADD || CASP2 and RIPK1 domain containing adaptor with death domain [Source:HGNC Symbol;Acc:HGNC:2340] [ENST00000550766]	1.83374	1.04276
AL162045	LOC100130370	AL162045 || LOC100130370 || Homo sapiens mRNA; cDNA DKFZp761P0212 (from clone DKFZp761P0212); partial cds. [AL162045]	1.8326	4.94107
NM_004567	PFKFB4	NM_004567 || PFKFB4 || Homo sapiens 6-phosphofructo-2-kinase/fructose-2,6-biphosphatase 4 (PFKFB4), mRNA [NM_004567]	1.83111	0
NM_207341	ZP1	NM_207341 || ZP1 || Homo sapiens zona pellucida glycoprotein 1 (sperm receptor) (ZP1), mRNA [NM_207341]	1.82407	0
NM_152527	SLC16A14	NM_152527 || SLC16A14 || Homo sapiens solute carrier family 16, member 14 (SLC16A14), mRNA [NM_152527]	1.82387	0.839754
NR_051960	FALEC	NR_051960 || FALEC || Homo sapiens focally amplified long non-coding RNA in epithelial cancer (FALEC), long non-coding RNA [NR_051960]	1.82043	0.607365
NM_016192	TMEFF2	NM_016192 || TMEFF2 || Homo sapiens transmembrane protein with EGF-like and two follistatin-like domains 2 (TMEFF2), mRNA [NM_016192]	1.81906	0.256888
A_33_P3294103		A_33_P3294103 || unmapped	1.81769	3.94553
NM_001243756	PXN	NM_001243756 || PXN || Homo sapiens paxillin (PXN), transcript variant 3, mRNA [NM_001243756]	1.81645	0.631073
NM_005850	SF3B4	NM_005850 || SF3B4 || Homo sapiens splicing factor 3b, subunit 4, 49kDa (SF3B4), mRNA [NM_005850]	1.81114	0.137619
NM_000120	EPHX1	NM_000120 || EPHX1 || Homo sapiens epoxide hydrolase 1, microsomal (xenobiotic) (EPHX1), transcript variant 1, mRNA [NM_000120]	1.80667	0
lnc-LRRC18-2:1	lnc-LRRC18-2	lnc-LRRC18-2:1 || lnc-LRRC18-2 || AGENCOURT_6565465 NIH_MGC_119 Homo sapiens cDNA clone IMAGE:5744148 5', mRNA sequence [BM559346]	1.80615	7.58603
NM_005689	ABCB6	NM_005689 || ABCB6 || Homo sapiens ATP-binding cassette, sub-family B (MDR/TAP), member 6 (Langereis blood group) (ABCB6), mRNA [NM_005689]	1.80466	0
NM_004932	CDH6	NM_004932 || CDH6 || Homo sapiens cadherin 6, type 2, K-cadherin (fetal kidney) (CDH6), mRNA [NM_004932]	1.80085	1.105
ENST00000433816		ENST00000433816 || || glyceraldehyde 3 phosphate dehydrogenase pseudogene 32 [Source:HGNC Symbol;Acc:HGNC:37784] [ENST00000433816]	1.79805	1.60172
NM_182981	OSGIN1	NM_182981 || OSGIN1 || Homo sapiens oxidative stress induced growth inhibitor 1 (OSGIN1), mRNA [NM_182981]	1.79799	0.604665
lnc-NAP1L3-1:1	lnc-NAP1L3-1	lnc-NAP1L3-1:1 || lnc-NAP1L3-1 || Homo sapiens cDNA FLJ43298 fis, clone NCRRP1000129. [AK125288]	1.79615	0
lnc-OR51B4-3:1	lnc-OR51B4-3	lnc-OR51B4-3:1 || lnc-OR51B4-3 || Homo sapiens beta globin locus control region sequence. [AY195961]	1.7948	0
NM_016831	PER3	NM_016831 || PER3 || Homo sapiens period circadian clock 3 (PER3), transcript variant 4, mRNA [NM_016831]	1.79426	0.132288
NM_032467	ASPH	NM_032467 || ASPH || Homo sapiens aspartate beta-hydroxylase (ASPH), transcript variant 4, mRNA [NM_032467]	1.7931	0
ENST00000624358	CYP26C1	ENST00000624358 || CYP26C1 || cytochrome P450, family 26, subfamily C, polypeptide 1 [Source:HGNC Symbol;Acc:HGNC:20577] [ENST00000624358]	1.791	0
ENST00000436880	MIR181A1HG	ENST00000436880 || MIR181A1HG || MIR181A1 host gene (non-protein coding) [Source:HGNC Symbol;Acc:HGNC:48659] [ENST00000436880]	1.79014	1.45997
NM_001159491	BRI3	NM_001159491 || BRI3 || Homo sapiens brain protein I3 (BRI3), transcript variant 2, mRNA [NM_001159491]	1.78993	0.288555
NM_001218	CA12	NM_001218 || CA12 || Homo sapiens carbonic anhydrase XII (CA12), transcript variant 1, mRNA [NM_001218]	1.78812	0
NM_198277	SLC37A2	NM_198277 || SLC37A2 || Homo sapiens solute carrier family 37 (glucose-6-phosphate transporter), member 2 (SLC37A2), transcript variant 1, mRNA [NM_198277]	1.78719	0
ENST00000563695		ENST00000563695 || || Homo sapiens cDNA clone IMAGE:4605966, partial cds. [BC071777]	1.78553	0.732131
lnc-FKBP2-1:1	lnc-FKBP2-1	lnc-FKBP2-1:1 || lnc-FKBP2-1 || Q2AC61_9BURK (Q2AC61) HrpW, partial (3%) [THC2716184]	1.78456	0
NM_002046	GAPDH	NM_002046 || GAPDH || Homo sapiens glyceraldehyde-3-phosphate dehydrogenase (GAPDH), transcript variant 1, mRNA [NM_002046]	1.78268	0
NR_026575	GK3P	NR_026575 || GK3P || Homo sapiens glycerol kinase 3 pseudogene (GK3P), non-coding RNA [NR_026575]	1.78179	0
NM_145901	HMGA1	NM_145901 || HMGA1 || Homo sapiens high mobility group AT-hook 1 (HMGA1), transcript variant 3, mRNA [NM_145901]	1.77975	0
NM_006670	TPBG	NM_006670 || TPBG || Homo sapiens trophoblast glycoprotein (TPBG), transcript variant 1, mRNA [NM_006670]	1.77234	0
NM_015444	TMEM158	NM_015444 || TMEM158 || Homo sapiens transmembrane protein 158 (gene/pseudogene) (TMEM158), mRNA [NM_015444]	1.7719	0
XR_428101	LOC101927609	XR_428101 || LOC101927609 || PREDICTED: Homo sapiens uncharacterized LOC101927609 (LOC101927609), transcript variant X2, ncRNA [XR_428101]	1.77168	2.0077
ENST00000243806	FAM124B	ENST00000243806 || FAM124B || family with sequence similarity 124B [Source:HGNC Symbol;Acc:HGNC:26224] [ENST00000243806]	1.77148	1.43927
NM_002203	ITGA2	NM_002203 || ITGA2 || Homo sapiens integrin, alpha 2 (CD49B, alpha 2 subunit of VLA-2 receptor) (ITGA2), transcript variant 1, mRNA [NM_002203]	1.77115	1.24511
ENST00000424940		ENST00000424940 || || vomeronasal 1 receptor 64 pseudogene [Source:HGNC Symbol;Acc:HGNC:37384] [ENST00000424940]	1.77012	4.82419
NM_016614	TDP2	NM_016614 || TDP2 || Homo sapiens tyrosyl-DNA phosphodiesterase 2 (TDP2), mRNA [NM_016614]	1.76951	0
lnc-TSEN2-1:2	lnc-TSEN2-1	lnc-TSEN2-1:2 || lnc-TSEN2-1 || LNCipedia lincRNA (lnc-TSEN2-1), lincRNA [lnc-TSEN2-1:2]	1.76934	8.06703
lnc-CTC-241N9.1.1-1:1	lnc-CTC-241N9.1.1-1	lnc-CTC-241N9.1.1-1:1 || lnc-CTC-241N9.1.1-1 || LNCipedia lincRNA (lnc-CTC-241N9.1.1-1), lincRNA [lnc-CTC-241N9.1.1-1:1]	1.76794	1.04276
ENST00000580326		ENST00000580326 || || BX119021 Soares_NhHMPu_S1 Homo sapiens cDNA clone IMAGp998K034258, mRNA sequence [BX119021]	1.76727	8.4009
NM_001001547	CD36	NM_001001547 || CD36 || Homo sapiens CD36 molecule (thrombospondin receptor) (CD36), transcript variant 2, mRNA [NM_001001547]	1.766	0.143671
NM_012449	STEAP1	NM_012449 || STEAP1 || Homo sapiens six transmembrane epithelial antigen of the prostate 1 (STEAP1), mRNA [NM_012449]	1.76553	0
NM_014331	SLC7A11	NM_014331 || SLC7A11 || Homo sapiens solute carrier family 7 (anionic amino acid transporter light chain, xc- system), member 11 (SLC7A11), mRNA [NM_014331]	1.76143	0
NR_034147	APCDD1L-AS1	NR_034147 || APCDD1L-AS1 || Homo sapiens APCDD1L antisense RNA 1 (head to head) (APCDD1L-AS1), long non-coding RNA [NR_034147]	1.76064	0.139665
ENST00000512278		ENST00000512278 || || glyceraldehyde-3-phosphate dehydrogenase pseudogene 76 [Source:HGNC Symbol;Acc:HGNC:50649] [ENST00000512278]	1.75747	0
NM_001243288	PVRL3	NM_001243288 || PVRL3 || Homo sapiens poliovirus receptor-related 3 (PVRL3), transcript variant 3, mRNA [NM_001243288]	1.75533	2.93491
NM_000146	FTL	NM_000146 || FTL || Homo sapiens ferritin, light polypeptide (FTL), mRNA [NM_000146]	1.75308	0
ENST00000537276	ABCB9	ENST00000537276 || ABCB9 || ATP-binding cassette, sub-family B (MDR/TAP), member 9 [Source:HGNC Symbol;Acc:HGNC:50] [ENST00000537276]	1.75125	4.94107
lnc-ANKRD27-2:3	lnc-ANKRD27-2	lnc-ANKRD27-2:3 || lnc-ANKRD27-2 || LNCipedia lincRNA (lnc-ANKRD27-2), lincRNA [lnc-ANKRD27-2:3]	1.75107	1.61939
NR_047476	LRRC3-AS1	NR_047476 || LRRC3-AS1 || Homo sapiens LRRC3 antisense RNA 1 (head to head) (LRRC3-AS1), long non-coding RNA [NR_047476]	1.75037	3.28079
lnc-PHF14-1:5	lnc-PHF14-1	lnc-PHF14-1:5 || lnc-PHF14-1 || LNCipedia lincRNA (lnc-PHF14-1), lincRNA [lnc-PHF14-1:5]	1.74758	0.331987
NM_032487	ACTRT3	NM_032487 || ACTRT3 || Homo sapiens actin-related protein T3 (ACTRT3), mRNA [NM_032487]	1.74734	5.3737
A_33_P3420013		A_33_P3420013 || unmapped	1.74663	0.235918
NM_003483	HMGA2	NM_003483 || HMGA2 || Homo sapiens high mobility group AT-hook 2 (HMGA2), transcript variant 1, mRNA [NM_003483]	1.74629	0
NM_145910	NEK11	NM_145910 || NEK11 || Homo sapiens NIMA-related kinase 11 (NEK11), transcript variant 2, mRNA [NM_145910]	1.74392	0.252147
lnc-DNAJB2-1:1	lnc-DNAJB2-1	lnc-DNAJB2-1:1 || lnc-DNAJB2-1 || LNCipedia lincRNA (lnc-DNAJB2-1), lincRNA [lnc-DNAJB2-1:1]	1.7435	1.75458
NM_000158	GBE1	NM_000158 || GBE1 || Homo sapiens glucan (1,4-alpha-), branching enzyme 1 (GBE1), mRNA [NM_000158]	1.74343	0
NM_001432	EREG	NM_001432 || EREG || Homo sapiens epiregulin (EREG), mRNA [NM_001432]	1.73873	0.573249
A_33_P3251252		A_33_P3251252 || unmapped	1.73498	0.411161
NM_173552	C3orf58	NM_173552 || C3orf58 || Homo sapiens chromosome 3 open reading frame 58 (C3orf58), transcript variant 1, mRNA [NM_173552]	1.73465	0.132288
XR_425104	LOC102723817	XR_425104 || LOC102723817 || PREDICTED: Homo sapiens uncharacterized LOC102723817 (LOC102723817), ncRNA [XR_425104]	1.7333	2.40025
NM_013304	ZDHHC1	NM_013304 || ZDHHC1 || Homo sapiens zinc finger, DHHC-type containing 1 (ZDHHC1), mRNA [NM_013304]	1.73028	3.89407
NM_001161625	NXNL2	NM_001161625 || NXNL2 || Homo sapiens nucleoredoxin-like 2 (NXNL2), transcript variant 1, mRNA [NM_001161625]	1.73007	2.93491
NM_000210	ITGA6	NM_000210 || ITGA6 || Homo sapiens integrin, alpha 6 (ITGA6), transcript variant 2, mRNA [NM_000210]	1.72854	0
NM_019032	ADAMTSL4	NM_019032 || ADAMTSL4 || Homo sapiens ADAMTS-like 4 (ADAMTSL4), transcript variant 1, mRNA [NM_019032]	1.72845	6.42066
NM_014471	SPINK4	NM_014471 || SPINK4 || Homo sapiens serine peptidase inhibitor, Kazal type 4 (SPINK4), mRNA [NM_014471]	1.72332	0.243171
NM_005063	SCD	NM_005063 || SCD || Homo sapiens stearoyl-CoA desaturase (delta-9-desaturase) (SCD), mRNA [NM_005063]	1.72272	0
ENST00000394939	GTF2IRD2B	ENST00000394939 || GTF2IRD2B || GTF2I repeat domain containing 2B [Source:HGNC Symbol;Acc:HGNC:33125] [ENST00000394939]	1.72072	7.58603
NM_004138	KRT33A	NM_004138 || KRT33A || Homo sapiens keratin 33A, type I (KRT33A), mRNA [NM_004138]	1.71734	1.02318
NM_020169	LXN	NM_020169 || LXN || Homo sapiens latexin (LXN), mRNA [NM_020169]	1.71535	0
NM_000402	G6PD	NM_000402 || G6PD || Homo sapiens glucose-6-phosphate dehydrogenase (G6PD), transcript variant 1, mRNA [NM_000402]	1.71533	0
NM_002432	MNDA	NM_002432 || MNDA || Homo sapiens myeloid cell nuclear differentiation antigen (MNDA), mRNA [NM_002432]	1.71392	0.135387
NM_014271	IL1RAPL1	NM_014271 || IL1RAPL1 || Homo sapiens interleukin 1 receptor accessory protein-like 1 (IL1RAPL1), mRNA [NM_014271]	1.71347	1.15956
BX445743		BX445743 || || BX445743 Homo sapiens T CELLS (JURKAT CELL LINE) Homo sapiens cDNA clone CS0DH002YB13 3-PRIME, mRNA sequence [BX445743]	1.71209	0.513377
TCONS_l2_00013854	XLOC_l2_007456	TCONS_l2_00013854 || XLOC_l2_007456 || BROAD Institute lincRNA (XLOC_l2_007456), lincRNA [TCONS_l2_00013854]	1.70944	0.132288
lnc-CTD-2134A5.2.1-2:1	lnc-CTD-2134A5.2.1-2	lnc-CTD-2134A5.2.1-2:1 || lnc-CTD-2134A5.2.1-2 || LNCipedia lincRNA (lnc-CTD-2134A5.2.1-2), lincRNA [lnc-CTD-2134A5.2.1-2:1]	1.70919	1.34826
NM_004163	RAB27B	NM_004163 || RAB27B || Homo sapiens RAB27B, member RAS oncogene family (RAB27B), mRNA [NM_004163]	1.7087	0.604665
TCONS_l2_00025938	XLOC_l2_013448	TCONS_l2_00025938 || XLOC_l2_013448 || BROAD Institute lincRNA (XLOC_l2_013448), lincRNA [TCONS_l2_00025938]	1.70837	0.243171
lnc-DPP6-2:1	lnc-DPP6-2	lnc-DPP6-2:1 || lnc-DPP6-2 || LNCipedia lincRNA (lnc-DPP6-2), lincRNA [lnc-DPP6-2:1]	1.70774	4.94107
ENST00000495363		ENST00000495363 || || small integral membrane protein 11 [Source:HGNC Symbol;Acc:HGNC:1293] [ENST00000495363]	1.70641	0
A_33_P3404116		A_33_P3404116 || unmapped	1.70547	2.80882
NM_002081	GPC1	NM_002081 || GPC1 || Homo sapiens glypican 1 (GPC1), mRNA [NM_002081]	1.70356	0
NM_024875	SYNPO2L	NM_024875 || SYNPO2L || Homo sapiens synaptopodin 2-like (SYNPO2L), transcript variant 2, mRNA [NM_024875]	1.70275	6.24009
ENST00000293829	FGF11	ENST00000293829 || FGF11 || fibroblast growth factor 11 [Source:HGNC Symbol;Acc:HGNC:3667] [ENST00000293829]	1.70198	0
NM_014288	ITGB3BP	NM_014288 || ITGB3BP || Homo sapiens integrin beta 3 binding protein (beta3-endonexin) (ITGB3BP), transcript variant 2, mRNA [NM_014288]	1.69996	0
TCONS_l2_00022565	XLOC_l2_011798	TCONS_l2_00022565 || XLOC_l2_011798 || BROAD Institute lincRNA (XLOC_l2_011798), lincRNA [TCONS_l2_00022565]	1.69982	6.80203
NM_020194	MFF	NM_020194 || MFF || Homo sapiens mitochondrial fission factor (MFF), transcript variant 2, mRNA [NM_020194]	1.69791	0
NM_001009939	SEPT5	NM_001009939 || SEPT5 || Homo sapiens septin 5 (SEPT5), transcript variant 2, mRNA [NM_001009939]	1.69779	3.06663
NM_138711	PPARG	NM_138711 || PPARG || Homo sapiens peroxisome proliferator-activated receptor gamma (PPARG), transcript variant 3, mRNA [NM_138711]	1.69752	0
NM_001275	CHGA	NM_001275 || CHGA || Homo sapiens chromogranin A (parathyroid secretory protein 1) (CHGA), transcript variant 1, mRNA [NM_001275]	1.69618	2.93491
NM_001769	CD9	NM_001769 || CD9 || Homo sapiens CD9 molecule (CD9), mRNA [NM_001769]	1.69524	0
lnc-CDS1-2:1	lnc-CDS1-2	lnc-CDS1-2:1 || lnc-CDS1-2 || Homo sapiens cDNA clone IMAGE:40021650. [BC101193]	1.69518	1.84524
NM_001164436	TMEM212	NM_001164436 || TMEM212 || Homo sapiens transmembrane protein 212 (TMEM212), mRNA [NM_001164436]	1.69166	0
ENST00000417112	LOC102723721	ENST00000417112 || LOC102723721 || PREDICTED: Homo sapiens uncharacterized LOC102723721 (LOC102723721), ncRNA [XR_424100]	1.68617	5.09647
NM_178122	STPG1	NM_178122 || STPG1 || Homo sapiens sperm-tail PG-rich repeat containing 1 (STPG1), transcript variant 3, mRNA [NM_178122]	1.68426	0.42392
NM_080927	DCBLD2	NM_080927 || DCBLD2 || Homo sapiens discoidin, CUB and LCCL domain containing 2 (DCBLD2), mRNA [NM_080927]	1.68372	0
NM_004996	ABCC1	NM_004996 || ABCC1 || Homo sapiens ATP-binding cassette, sub-family C (CFTR/MRP), member 1 (ABCC1), mRNA [NM_004996]	1.68326	0.235918
A_33_P3328284		A_33_P3328284 || unmapped	1.68262	0.288555
lnc-BBC3-1:1	lnc-BBC3-1	lnc-BBC3-1:1 || lnc-BBC3-1 || LNCipedia lincRNA (lnc-BBC3-1), lincRNA [lnc-BBC3-1:1]	1.68245	2.08097
NR_110042	LOC101927058	NR_110042 || LOC101927058 || Homo sapiens uncharacterized LOC101927058 (LOC101927058), long non-coding RNA [NR_110042]	1.67826	2.20356
NM_003811	TNFSF9	NM_003811 || TNFSF9 || Homo sapiens tumor necrosis factor (ligand) superfamily, member 9 (TNFSF9), mRNA [NM_003811]	1.67743	0.323878
NM_005165	ALDOC	NM_005165 || ALDOC || Homo sapiens aldolase C, fructose-bisphosphate (ALDOC), mRNA [NM_005165]	1.67571	0
ENST00000450472		ENST00000450472 || || glyceraldehyde-3-phosphate dehydrogenase pseudogene 14 [Source:HGNC Symbol;Acc:HGNC:4160] [ENST00000450472]	1.67564	0
NM_144581	L3HYPDH	NM_144581 || L3HYPDH || Homo sapiens L-3-hydroxyproline dehydratase (trans-) (L3HYPDH), mRNA [NM_144581]	1.67523	0.63476
ENST00000539116		ENST00000539116 || || Unknown	1.6746	0.961569
NM_001122	PLIN2	NM_001122 || PLIN2 || Homo sapiens perilipin 2 (PLIN2), transcript variant 1, mRNA [NM_001122]	1.67394	0
NM_001012761	RGMB	NM_001012761 || RGMB || Homo sapiens repulsive guidance molecule family member b (RGMB), mRNA [NM_001012761]	1.67183	0.631073
NM_080738	EDARADD	NM_080738 || EDARADD || Homo sapiens EDAR-associated death domain (EDARADD), transcript variant B, mRNA [NM_080738]	1.66909	0
NR_119377	DLGAP1-AS2	NR_119377 || DLGAP1-AS2 || Homo sapiens DLGAP1 antisense RNA 2 (DLGAP1-AS2), long non-coding RNA [NR_119377]	1.66459	1.41773
lnc-MSRB3-2:2	lnc-MSRB3-2	lnc-MSRB3-2:2 || lnc-MSRB3-2 || LNCipedia lincRNA (lnc-MSRB3-2), lincRNA [lnc-MSRB3-2:2]	1.66217	0.418606
NM_001444	FABP5	NM_001444 || FABP5 || Homo sapiens fatty acid binding protein 5 (psoriasis-associated) (FABP5), mRNA [NM_001444]	1.6621	0
NM_003873	NRP1	NM_003873 || NRP1 || Homo sapiens neuropilin 1 (NRP1), transcript variant 1, mRNA [NM_003873]	1.66208	0
lnc-RAB9A-1:1	lnc-RAB9A-1	lnc-RAB9A-1:1 || lnc-RAB9A-1 || Q4VAK4_HUMAN (Q4VAK4) OFD1 protein, partial (10%) [THC2726998]	1.66203	0.537993
ENST00000513369		ENST00000513369 || || Unknown	1.66183	0
NM_138341	TMEM116	NM_138341 || TMEM116 || Homo sapiens transmembrane protein 116 (TMEM116), transcript variant 3, mRNA [NM_138341]	1.66142	0
A25969		A25969 || || H.sapiens mRNA for T-cell receptor IGR b 18 Vbeta 7. [A25969]	1.66131	0.732131
THC2679903		THC2679903 || || Q803U8_BRARE (Q803U8) Splicing factor, arginine/serine-rich 11, partial (4%) [THC2679903]	1.6592	1.41773
NM_031916	ROPN1L	NM_031916 || ROPN1L || Homo sapiens rhophilin associated tail protein 1-like (ROPN1L), transcript variant 1, mRNA [NM_031916]	1.65907	0.491109
ENST00000514327		ENST00000514327 || || Unknown	1.65683	0
NM_001258397	CCDC103	NM_001258397 || CCDC103 || Homo sapiens coiled-coil domain containing 103 (CCDC103), transcript variant 4, mRNA [NM_001258397]	1.65676	1.12907
NM_030936	RNF32	NM_030936 || RNF32 || Homo sapiens ring finger protein 32 (RNF32), transcript variant 3, mRNA [NM_030936]	1.65637	0.148497
NM_000291	PGK1	NM_000291 || PGK1 || Homo sapiens phosphoglycerate kinase 1 (PGK1), mRNA [NM_000291]	1.65623	0
ENST00000443168		ENST00000443168 || || glyceraldehyde 3 phosphate dehydrogenase pseudogene 33 [Source:HGNC Symbol;Acc:HGNC:37785] [ENST00000443168]	1.65585	0.16442
NR_026796	LINC00520	NR_026796 || LINC00520 || Homo sapiens long intergenic non-protein coding RNA 520 (LINC00520), transcript variant 1, long non-coding RNA [NR_026796]	1.65508	0.132288
lnc-MBTPS2-1:2	lnc-MBTPS2-1	lnc-MBTPS2-1:2 || lnc-MBTPS2-1 || LNCipedia lincRNA (lnc-MBTPS2-1), lincRNA [lnc-MBTPS2-1:2]	1.65497	5.09647
AK127414	LOC100132495	AK127414 || LOC100132495 || Homo sapiens cDNA FLJ45506 fis, clone BRTHA2020695. [AK127414]	1.6543	0
NM_001039888	ANKRD34A	NM_001039888 || ANKRD34A || Homo sapiens ankyrin repeat domain 34A (ANKRD34A), mRNA [NM_001039888]	1.65397	2.03028
ENST00000507324		ENST00000507324 || || glyceraldehyde 3 phosphate dehydrogenase pseudogene 61 [Source:HGNC Symbol;Acc:HGNC:4155] [ENST00000507324]	1.6504	0
NM_001205019	GK	NM_001205019 || GK || Homo sapiens glycerol kinase (GK), transcript variant 4, mRNA [NM_001205019]	1.64867	0.16442
lnc-HAO1-2:4	lnc-HAO1-2	lnc-HAO1-2:4 || lnc-HAO1-2 || LNCipedia lincRNA (lnc-HAO1-2), lincRNA [lnc-HAO1-2:4]	1.64696	1.97949
TCONS_l2_00007046	XLOC_l2_003882	TCONS_l2_00007046 || XLOC_l2_003882 || BROAD Institute lincRNA (XLOC_l2_003882), lincRNA [TCONS_l2_00007046]	1.64592	0.546471
THC2552980		THC2552980 || || ZSWM1_HUMAN (Q9BR11) Zinc finger SWIM domain-containing protein 1, partial (79%) [THC2552980]	1.64536	3.8006
lnc-CISD2-4:2	lnc-CISD2-4	lnc-CISD2-4:2 || lnc-CISD2-4 || LNCipedia lincRNA (lnc-CISD2-4), lincRNA [lnc-CISD2-4:2]	1.64485	3.50317
NM_000410	HFE	NM_000410 || HFE || Homo sapiens hemochromatosis (HFE), transcript variant 1, mRNA [NM_000410]	1.64484	1.02318
NM_199296	ISM2	NM_199296 || ISM2 || Homo sapiens isthmin 2 (ISM2), transcript variant 1, mRNA [NM_199296]	1.64473	8.06703
AK123491		AK123491 || || Homo sapiens cDNA FLJ41497 fis, clone BRTHA2006075. [AK123491]	1.64232	5.3737
TCONS_l2_00021387	XLOC_l2_011350	TCONS_l2_00021387 || XLOC_l2_011350 || BROAD Institute lincRNA (XLOC_l2_011350), lincRNA [TCONS_l2_00021387]	1.64154	0.484148
NM_001428	ENO1	NM_001428 || ENO1 || Homo sapiens enolase 1, (alpha) (ENO1), transcript variant 1, mRNA [NM_001428]	1.64096	0
ENST00000483353	ST6GALNAC6	ENST00000483353 || ST6GALNAC6 || ST6 (alpha-N-acetyl-neuraminyl-2,3-beta-galactosyl-1,3)-N-acetylgalactosaminide alpha-2,6-sialyltransferase 6 [Source:HGNC Symbol;Acc:HGNC:23364] [ENST00000483353]	1.63951	9.23036
NM_000169	GLA	NM_000169 || GLA || Homo sapiens galactosidase, alpha (GLA), mRNA [NM_000169]	1.6395	0
lnc-PARN-3:1	lnc-PARN-3	lnc-PARN-3:1 || lnc-PARN-3 || LNCipedia lincRNA (lnc-PARN-3), lincRNA [lnc-PARN-3:1]	1.63888	0.172339
NM_173555	TYSND1	NM_173555 || TYSND1 || Homo sapiens trypsin domain containing 1 (TYSND1), transcript variant 1, mRNA [NM_173555]	1.63884	2.29913
NR_104654	LOC257396	NR_104654 || LOC257396 || Homo sapiens uncharacterized LOC257396 (LOC257396), transcript variant 2, long non-coding RNA [NR_104654]	1.63869	2.93491
NM_033300	LRP8	NM_033300 || LRP8 || Homo sapiens low density lipoprotein receptor-related protein 8, apolipoprotein e receptor (LRP8), transcript variant 2, mRNA [NM_033300]	1.63756	0.150883
lnc-FXYD4-1:1	lnc-FXYD4-1	lnc-FXYD4-1:1 || lnc-FXYD4-1 || LNCipedia lincRNA (lnc-FXYD4-1), lincRNA [lnc-FXYD4-1:1]	1.63632	7.81615
NM_013280	FLRT1	NM_013280 || FLRT1 || Homo sapiens fibronectin leucine rich transmembrane protein 1 (FLRT1), mRNA [NM_013280]	1.63511	1.1905
NM_004001	FCGR2B	NM_004001 || FCGR2B || Homo sapiens Fc fragment of IgG, low affinity IIb, receptor (CD32) (FCGR2B), transcript variant 1, mRNA [NM_004001]	1.63508	0.631073
ENST00000430494		ENST00000430494 || || PREDICTED: Homo sapiens uncharacterized LOC101059946 (LOC101059946), misc_RNA [XR_171346]	1.63444	1.1905
NM_145791	MGST1	NM_145791 || MGST1 || Homo sapiens microsomal glutathione S-transferase 1 (MGST1), transcript variant 3, mRNA [NM_145791]	1.63419	0
NM_198276	TMEM17	NM_198276 || TMEM17 || Homo sapiens transmembrane protein 17 (TMEM17), mRNA [NM_198276]	1.6338	0.405613
A_33_P3271187		A_33_P3271187 || unmapped	1.63313	1.75458
ENST00000449466	LOC101929484	ENST00000449466 || LOC101929484 || PREDICTED: Homo sapiens uncharacterized LOC101929484 (LOC101929484), ncRNA [XR_245642]	1.63162	1.09198
NM_001143986	TLE6	NM_001143986 || TLE6 || Homo sapiens transducin-like enhancer of split 6 (TLE6), transcript variant 1, mRNA [NM_001143986]	1.63046	0.135387
NM_000527	LDLR	NM_000527 || LDLR || Homo sapiens low density lipoprotein receptor (LDLR), transcript variant 1, mRNA [NM_000527]	1.62728	0
NM_018248	NEIL3	NM_018248 || NEIL3 || Homo sapiens nei endonuclease VIII-like 3 (E. coli) (NEIL3), mRNA [NM_018248]	1.62714	5.3737
NM_001193388	UNKL	NM_001193388 || UNKL || Homo sapiens unkempt family zinc finger-like (UNKL), transcript variant 1, mRNA [NM_001193388]	1.62668	0.167349
NM_005391	PDK3	NM_005391 || PDK3 || Homo sapiens pyruvate dehydrogenase kinase, isozyme 3 (PDK3), transcript variant 2, mRNA [NM_005391]	1.62567	1.60172
NM_032129	PLEKHN1	NM_032129 || PLEKHN1 || Homo sapiens pleckstrin homology domain containing, family N member 1 (PLEKHN1), transcript variant 1, mRNA [NM_032129]	1.62432	0.23968
ENST00000542775		ENST00000542775 || || Homo sapiens docking protein 1-like protein mRNA, partial cds. [AF229166]	1.62377	1.43927
ENST00000624544	PGA4	ENST00000624544 || PGA4 || pepsinogen 4, group I (pepsinogen A) [Source:HGNC Symbol;Acc:HGNC:8886] [ENST00000624544]	1.62364	0
NM_001204418	RGS6	NM_001204418 || RGS6 || Homo sapiens regulator of G-protein signaling 6 (RGS6), transcript variant 4, mRNA [NM_001204418]	1.62278	9.23036
NR_047026	LINC00443	NR_047026 || LINC00443 || Homo sapiens long intergenic non-protein coding RNA 443 (LINC00443), long non-coding RNA [NR_047026]	1.62219	3.68079
NM_001135032	EVA1A	NM_001135032 || EVA1A || Homo sapiens eva-1 homolog A (C. elegans) (EVA1A), transcript variant 1, mRNA [NM_001135032]	1.62199	1.43927
NM_032843	FIBCD1	NM_032843 || FIBCD1 || Homo sapiens fibrinogen C domain containing 1 (FIBCD1), transcript variant 1, mRNA [NM_032843]	1.62188	0.523125
lnc-NUPL1-2:1	lnc-NUPL1-2	lnc-NUPL1-2:1 || lnc-NUPL1-2 || LNCipedia lincRNA (lnc-NUPL1-2), lincRNA [lnc-NUPL1-2:1]	1.62044	8.7866
A_33_P3360758		A_33_P3360758 || unmapped	1.61979	1.43927
NM_152495	CNIH3	NM_152495 || CNIH3 || Homo sapiens cornichon family AMPA receptor auxiliary protein 3 (CNIH3), mRNA [NM_152495]	1.61882	0.145338
NM_001164460	STEAP1B	NM_001164460 || STEAP1B || Homo sapiens STEAP family member 1B (STEAP1B), transcript variant 1, mRNA [NM_001164460]	1.61734	0.247577
NM_001040260	DCLK2	NM_001040260 || DCLK2 || Homo sapiens doublecortin-like kinase 2 (DCLK2), transcript variant 1, mRNA [NM_001040260]	1.61684	1.34826
NM_152440	C12orf66	NM_152440 || C12orf66 || Homo sapiens chromosome 12 open reading frame 66 (C12orf66), transcript variant 2, mRNA [NM_152440]	1.61613	3.41056
ENST00000620637		ENST00000620637 || || Unknown	1.61456	9.91133
NM_002668	PLP2	NM_002668 || PLP2 || Homo sapiens proteolipid protein 2 (colonic epithelium-enriched) (PLP2), mRNA [NM_002668]	1.61447	0.141773
ENST00000444823		ENST00000444823 || || glyceraldehyde 3 phosphate dehydrogenase pseudogene 23 [Source:HGNC Symbol;Acc:HGNC:37775] [ENST00000444823]	1.6142	0.323878
NM_002873	RAD17	NM_002873 || RAD17 || Homo sapiens RAD17 homolog (S. pombe) (RAD17), transcript variant 8, mRNA [NM_002873]	1.61276	1.97949
lnc-FKBP2-1:2	lnc-FKBP2-1	lnc-FKBP2-1:2 || lnc-FKBP2-1 || Q2AC61_9BURK (Q2AC61) HrpW, partial (3%) [THC2716184]	1.61174	0
NM_022736	MFSD1	NM_022736 || MFSD1 || Homo sapiens major facilitator superfamily domain containing 1 (MFSD1), transcript variant 1, mRNA [NM_022736]	1.6107	0
ENST00000295706	PPFIA4	ENST00000295706 || PPFIA4 || protein tyrosine phosphatase, receptor type, f polypeptide (PTPRF), interacting protein (liprin), alpha 4 [Source:HGNC Symbol;Acc:HGNC:9248] [ENST00000295706]	1.60954	0.16442
NM_006001	TUBA3C	NM_006001 || TUBA3C || Homo sapiens tubulin, alpha 3c (TUBA3C), mRNA [NM_006001]	1.60661	1.24511
NM_014917	NTNG1	NM_014917 || NTNG1 || Homo sapiens netrin G1 (NTNG1), transcript variant 3, mRNA [NM_014917]	1.60621	0
NM_001003682	TMEM200B	NM_001003682 || TMEM200B || Homo sapiens transmembrane protein 200B (TMEM200B), transcript variant 2, mRNA [NM_001003682]	1.60571	5.99377
NM_015960	CUTC	NM_015960 || CUTC || Homo sapiens cutC copper transporter (CUTC), mRNA [NM_015960]	1.60434	0
NM_001286072	MOV10	NM_001286072 || MOV10 || Homo sapiens Mov10 RISC complex RNA helicase (MOV10), transcript variant 3, mRNA [NM_001286072]	1.60405	1.43927
NM_030899	ZSCAN31	NM_030899 || ZSCAN31 || Homo sapiens zinc finger and SCAN domain containing 31 (ZSCAN31), transcript variant 1, mRNA [NM_030899]	1.60305	4.82419
NM_001136008	FXYD3	NM_001136008 || FXYD3 || Homo sapiens FXYD domain containing ion transport regulator 3 (FXYD3), transcript variant 4, mRNA [NM_001136008]	1.60032	5.09647
ENST00000555246	LINC00871	ENST00000555246 || LINC00871 || long intergenic non-protein coding RNA 871 [Source:HGNC Symbol;Acc:HGNC:47038] [ENST00000555246]	1.60012	9.23036
NM_014668	GREB1	NM_014668 || GREB1 || Homo sapiens growth regulation by estrogen in breast cancer 1 (GREB1), transcript variant a, mRNA [NM_014668]	1.60006	0.753658
lnc-EPCAM-3:2	lnc-EPCAM-3	lnc-EPCAM-3:2 || lnc-EPCAM-3 || LNCipedia lincRNA (lnc-EPCAM-3), lincRNA [lnc-EPCAM-3:2]	1.6	3.68079
NM_014367	FAM162A	NM_014367 || FAM162A || Homo sapiens family with sequence similarity 162, member A (FAM162A), mRNA [NM_014367]	1.59922	0
NM_001166692	C11orf91	NM_001166692 || C11orf91 || Homo sapiens chromosome 11 open reading frame 91 (C11orf91), mRNA [NM_001166692]	1.59907	1.97949
NM_005672	PSCA	NM_005672 || PSCA || Homo sapiens prostate stem cell antigen (PSCA), transcript variant 1, mRNA [NM_005672]	1.5978	0.247577
NM_017993	ENOX1	NM_017993 || ENOX1 || Homo sapiens ecto-NOX disulfide-thiol exchanger 1 (ENOX1), transcript variant 1, mRNA [NM_017993]	1.5971	1.105
NM_001878	CRABP2	NM_001878 || CRABP2 || Homo sapiens cellular retinoic acid binding protein 2 (CRABP2), transcript variant 1, mRNA [NM_001878]	1.5968	0.139665
A_33_P3353275		A_33_P3353275 || unmapped	1.59611	0
NM_017413	APLN	NM_017413 || APLN || Homo sapiens apelin (APLN), mRNA [NM_017413]	1.5959	0.63476
NM_006072	CCL26	NM_006072 || CCL26 || Homo sapiens chemokine (C-C motif) ligand 26 (CCL26), mRNA [NM_006072]	1.59581	0.732131
ENST00000599704	EMP3	ENST00000599704 || EMP3 || epithelial membrane protein 3 [Source:HGNC Symbol;Acc:HGNC:3335] [ENST00000599704]	1.5955	1.03923
NR_125359	LOC79160	NR_125359 || LOC79160 || Homo sapiens uncharacterized LOC79160 (LOC79160), long non-coding RNA [NR_125359]	1.59519	1.61939
ENST00000374439	MUSK	ENST00000374439 || MUSK || muscle, skeletal, receptor tyrosine kinase [Source:HGNC Symbol;Acc:HGNC:7525] [ENST00000374439]	1.59296	0.331987
ENST00000378725	SSU72	ENST00000378725 || SSU72 || SSU72 RNA polymerase II CTD phosphatase homolog (S. cerevisiae) [Source:HGNC Symbol;Acc:HGNC:25016] [ENST00000378725]	1.59285	1.105
NM_033100	CDHR1	NM_033100 || CDHR1 || Homo sapiens cadherin-related family member 1 (CDHR1), transcript variant 1, mRNA [NM_033100]	1.59237	2.58313
lnc-WDR60-3:1	lnc-WDR60-3	lnc-WDR60-3:1 || lnc-WDR60-3 || LNCipedia lincRNA (lnc-WDR60-3), lincRNA [lnc-WDR60-3:1]	1.59222	1.24511
NM_001111101	CNRIP1	NM_001111101 || CNRIP1 || Homo sapiens cannabinoid receptor interacting protein 1 (CNRIP1), transcript variant CRIP1b, mRNA [NM_001111101]	1.592	6.80203
NM_001256053	ANKRD26	NM_001256053 || ANKRD26 || Homo sapiens ankyrin repeat domain 26 (ANKRD26), transcript variant 2, mRNA [NM_001256053]	1.59194	5.3737
NM_177478	FTMT	NM_177478 || FTMT || Homo sapiens ferritin mitochondrial (FTMT), mRNA [NM_177478]	1.59182	0.617249
NM_207344	SPRYD4	NM_207344 || SPRYD4 || Homo sapiens SPRY domain containing 4 (SPRYD4), mRNA [NM_207344]	1.59179	0.607365
NM_024080	TRPM8	NM_024080 || TRPM8 || Homo sapiens transient receptor potential cation channel, subfamily M, member 8 (TRPM8), mRNA [NM_024080]	1.59152	8.7866
XR_242002	LOC101929188	XR_242002 || LOC101929188 || PREDICTED: Homo sapiens uncharacterized LOC101929188 (LOC101929188), ncRNA [XR_242002]	1.59004	3.17572
NM_006866	LILRA2	NM_006866 || LILRA2 || Homo sapiens leukocyte immunoglobulin-like receptor, subfamily A (with TM domain), member 2 (LILRA2), transcript variant 2, mRNA [NM_006866]	1.58992	0.546471
NM_001013632	TCTEX1D4	NM_001013632 || TCTEX1D4 || Homo sapiens Tctex1 domain containing 4 (TCTEX1D4), mRNA [NM_001013632]	1.58974	7.58603
A_33_P3349727		A_33_P3349727 || unmapped	1.58968	0.235918
ENST00000567075		ENST00000567075 || || golgin A8 family, member N [Source:HGNC Symbol;Acc:HGNC:44405] [ENST00000567075]	1.58929	2.20356
THC2591158		THC2591158 || || 1203217A dehydrogenase,glyceraldehydephosphate. {Homo sapiens} (exp=-1; wgp=0; cg=0) , partial (22%) [THC2591158]	1.5892	0.604665
NM_001289930	ZNF718	NM_001289930 || ZNF718 || Homo sapiens zinc finger protein 718 (ZNF718), transcript variant 2, mRNA [NM_001289930]	1.58897	5.09647
NR_120664	LOC101926941	NR_120664 || LOC101926941 || Homo sapiens uncharacterized LOC101926941 (LOC101926941), long non-coding RNA [NR_120664]	1.58649	0
AF190162		AF190162 || || Homo sapiens MSTP159 (MST159) mRNA, complete cds. [AF190162]	1.58545	2.93491
NM_024800	NEK11	NM_024800 || NEK11 || Homo sapiens NIMA-related kinase 11 (NEK11), transcript variant 1, mRNA [NM_024800]	1.58498	1.71387
NM_000955	PTGER1	NM_000955 || PTGER1 || Homo sapiens prostaglandin E receptor 1 (subtype EP1), 42kDa (PTGER1), mRNA [NM_000955]	1.58454	3.68079
lnc-CHMP1A-1:1	lnc-CHMP1A-1	lnc-CHMP1A-1:1 || lnc-CHMP1A-1 || LNCipedia lincRNA (lnc-CHMP1A-1), lincRNA [lnc-CHMP1A-1:1]	1.58421	0
NM_006829	ADIRF	NM_006829 || ADIRF || Homo sapiens adipogenesis regulatory factor (ADIRF), mRNA [NM_006829]	1.5841	0.247577
NM_001173517	MAP7D3	NM_001173517 || MAP7D3 || Homo sapiens MAP7 domain containing 3 (MAP7D3), transcript variant 3, mRNA [NM_001173517]	1.58292	1.93466
NM_032564	DGAT2	NM_032564 || DGAT2 || Homo sapiens diacylglycerol O-acyltransferase 2 (DGAT2), transcript variant 1, mRNA [NM_032564]	1.57851	0.145338
NM_020485	RHCE	NM_020485 || RHCE || Homo sapiens Rh blood group, CcEe antigens (RHCE), transcript variant 1, mRNA [NM_020485]	1.57824	1.02318
ENST00000524011		ENST00000524011 || || Unknown	1.57818	5.09647
ENST00000397095	GPR146	ENST00000397095 || GPR146 || G protein-coupled receptor 146 [Source:HGNC Symbol;Acc:HGNC:21718] [ENST00000397095]	1.5767	0.607365
THC2577776		THC2577776 || || HSENOAL2 alpha-enolase {Homo sapiens} (exp=-1; wgp=0; cg=0) , partial (78%) [THC2577776]	1.57661	1.34826
A_33_P3283167		A_33_P3283167 || unmapped	1.57659	0
A_32_P102252		A_32_P102252 || unmapped	1.57631	0.0890281
NM_001290557	ADIPOR1	NM_001290557 || ADIPOR1 || Homo sapiens adiponectin receptor 1 (ADIPOR1), transcript variant 3, mRNA [NM_001290557]	1.57579	0.617249
ENST00000619960		ENST00000619960 || || PREDICTED: Homo sapiens putative ubiquitin-like protein FUBI-like protein ENSP00000310146-like (LOC101927789), transcript variant X2, mRNA [XM_006718754]	1.57545	0
NM_020328	ACVR1B	NM_020328 || ACVR1B || Homo sapiens activin A receptor, type IB (ACVR1B), transcript variant 3, mRNA [NM_020328]	1.57404	1.105
NM_020428	SLC44A2	NM_020428 || SLC44A2 || Homo sapiens solute carrier family 44 (choline transporter), member 2 (SLC44A2), transcript variant 1, mRNA [NM_020428]	1.57388	0.150883
TCONS_l2_00007295	XLOC_l2_004072	TCONS_l2_00007295 || XLOC_l2_004072 || BROAD Institute lincRNA (XLOC_l2_004072), lincRNA [TCONS_l2_00007295]	1.57344	2.03028
NM_001001891	ANO7	NM_001001891 || ANO7 || Homo sapiens anoctamin 7 (ANO7), transcript variant NGEP-L, mRNA [NM_001001891]	1.57334	0.132288
NM_001146281	SHBG	NM_001146281 || SHBG || Homo sapiens sex hormone-binding globulin (SHBG), transcript variant 4, mRNA [NM_001146281]	1.57202	5.09647
NM_001080400	PLIN4	NM_001080400 || PLIN4 || Homo sapiens perilipin 4 (PLIN4), mRNA [NM_001080400]	1.57172	0.573249
ENST00000584649		ENST00000584649 || || Unknown	1.56971	0.883581
TCONS_l2_00014613	XLOC_l2_008047	TCONS_l2_00014613 || XLOC_l2_008047 || BROAD Institute lincRNA (XLOC_l2_008047), lincRNA [TCONS_l2_00014613]	1.56918	3.8006
NM_182470	PKM	NM_182470 || PKM || Homo sapiens pyruvate kinase, muscle (PKM), transcript variant 2, mRNA [NM_182470]	1.56914	0.137619
DW407923	SCARNA23	DW407923 || SCARNA23 || HHAGE000653 Human liver regeneration after partial hepatectomy Homo sapiens cDNA, mRNA sequence [DW407923]	1.56859	0.323878
NM_000365	TPI1	NM_000365 || TPI1 || Homo sapiens triosephosphate isomerase 1 (TPI1), transcript variant 1, mRNA [NM_000365]	1.56816	0.150883
lnc-MYO1D-1:1	lnc-MYO1D-1	lnc-MYO1D-1:1 || lnc-MYO1D-1 || Homo sapiens cDNA clone IMAGE:5273098. [BC037534]	1.56729	5.53417
NM_016242	EMCN	NM_016242 || EMCN || Homo sapiens endomucin (EMCN), transcript variant 1, mRNA [NM_016242]	1.56627	0
ENST00000444586		ENST00000444586 || || Homo sapiens hypothetical protein LOC340178, mRNA (cDNA clone IMAGE:5297033). [BC044924]	1.56612	8.4009
NM_001024629	NRP1	NM_001024629 || NRP1 || Homo sapiens neuropilin 1 (NRP1), transcript variant 3, mRNA [NM_001024629]	1.56568	0.132288
ENST00000449851		ENST00000449851 || || ribosomal protein L7 pseudogene 14 [Source:HGNC Symbol;Acc:HGNC:35984] [ENST00000449851]	1.56545	1.34826
A_21_P0014774		A_21_P0014774 || unmapped	1.56432	8.7866
NM_012429	SEC14L2	NM_012429 || SEC14L2 || Homo sapiens SEC14-like 2 (S. cerevisiae) (SEC14L2), transcript variant 1, mRNA [NM_012429]	1.56419	0.491109
ENST00000622592		ENST00000622592 || || AGENCOURT_7973391 NIH_MGC_72 Homo sapiens cDNA clone IMAGE:6168866 5', mRNA sequence [BU172748]	1.5636	6.24009
NM_182527	CABP7	NM_182527 || CABP7 || Homo sapiens calcium binding protein 7 (CABP7), mRNA [NM_182527]	1.56185	0
ENST00000555776		ENST00000555776 || || DB129663 THYMU2 Homo sapiens cDNA clone THYMU2040081 5', mRNA sequence [DB129663]	1.5612	0.252147
NM_002224	ITPR3	NM_002224 || ITPR3 || Homo sapiens inositol 1,4,5-trisphosphate receptor, type 3 (ITPR3), mRNA [NM_002224]	1.56102	0.573249
ENST00000378475	NRSN1	ENST00000378475 || NRSN1 || neurensin 1 [Source:HGNC Symbol;Acc:HGNC:17881] [ENST00000378475]	1.56101	1.04276
lnc-WDR60-7:1	lnc-WDR60-7	lnc-WDR60-7:1 || lnc-WDR60-7 || LNCipedia lincRNA (lnc-WDR60-7), lincRNA [lnc-WDR60-7:1]	1.56058	5.09647
NR_120495	ATE1-AS1	NR_120495 || ATE1-AS1 || Homo sapiens ATE1 antisense RNA 1 (head to head) (ATE1-AS1), long non-coding RNA [NR_120495]	1.56037	3.41056
NM_002316	LMX1B	NM_002316 || LMX1B || Homo sapiens LIM homeobox transcription factor 1, beta (LMX1B), transcript variant 1, mRNA [NM_002316]	1.55961	6.42066
NM_182847	ASIC4	NM_182847 || ASIC4 || Homo sapiens acid sensing (proton gated) ion channel family member 4 (ASIC4), mRNA [NM_182847]	1.55745	0.513377
NR_015421	LOC154761	NR_015421 || LOC154761 || Homo sapiens family with sequence similarity 115, member C pseudogene (LOC154761), non-coding RNA [NR_015421]	1.55721	5.53417
lnc-BOD1-1:3	lnc-BOD1-1	lnc-BOD1-1:3 || lnc-BOD1-1 || LNCipedia lincRNA (lnc-BOD1-1), lincRNA [lnc-BOD1-1:3]	1.55644	0.243171
NM_012344	NTSR2	NM_012344 || NTSR2 || Homo sapiens neurotensin receptor 2 (NTSR2), mRNA [NM_012344]	1.5563	0
NR_111005	MIR99AHG	NR_111005 || MIR99AHG || Homo sapiens mir-99a-let-7c cluster host gene (non-protein coding) (MIR99AHG), transcript variant 4, long non-coding RNA [NR_111005]	1.55629	1.97949
NM_004694	SLC16A6	NM_004694 || SLC16A6 || Homo sapiens solute carrier family 16, member 6 (SLC16A6), transcript variant 2, mRNA [NM_004694]	1.55581	0.42392
NM_001104554	PAQR5	NM_001104554 || PAQR5 || Homo sapiens progestin and adipoQ receptor family member V (PAQR5), transcript variant 1, mRNA [NM_001104554]	1.55541	0.617249
NM_153695	ZNF367	NM_153695 || ZNF367 || Homo sapiens zinc finger protein 367 (ZNF367), mRNA [NM_153695]	1.55486	6.42066
ENST00000451149		ENST00000451149 || || Unknown	1.5547	1.97949
lnc-DMRTB1-1:1	lnc-DMRTB1-1	lnc-DMRTB1-1:1 || lnc-DMRTB1-1 || LNCipedia lincRNA (lnc-DMRTB1-1), lincRNA [lnc-DMRTB1-1:1]	1.55451	0.137619
TCONS_l2_00008395	XLOC_l2_004553	TCONS_l2_00008395 || XLOC_l2_004553 || BROAD Institute lincRNA (XLOC_l2_004553), lincRNA [TCONS_l2_00008395]	1.55443	1.60172
NR_027134	DKFZp779M0652	NR_027134 || DKFZp779M0652 || Homo sapiens uncharacterized DKFZp779M0652 (DKFZp779M0652), long non-coding RNA [NR_027134]	1.55408	4.1832
NM_000688	ALAS1	NM_000688 || ALAS1 || Homo sapiens 5'-aminolevulinate synthase 1 (ALAS1), transcript variant 1, mRNA [NM_000688]	1.55403	0.159532
NM_006216	SERPINE2	NM_006216 || SERPINE2 || Homo sapiens serpin peptidase inhibitor, clade E (nexin, plasminogen activator inhibitor type 1), member 2 (SERPINE2), transcript variant 1, mRNA [NM_006216]	1.55159	0.135387
ENST00000504911		ENST00000504911 || || Q4VAM3_HUMAN (Q4VAM3) ACTN3 protein (Fragment), partial (8%) [THC2703250]	1.55159	1.12907
lnc-PHLDA3-2:1	lnc-PHLDA3-2	lnc-PHLDA3-2:1 || lnc-PHLDA3-2 || LNCipedia lincRNA (lnc-PHLDA3-2), lincRNA [lnc-PHLDA3-2:1]	1.55074	7.30408
NM_178234	TUSC3	NM_178234 || TUSC3 || Homo sapiens tumor suppressor candidate 3 (TUSC3), transcript variant 2, mRNA [NM_178234]	1.55067	0
NM_001713	BHMT	NM_001713 || BHMT || Homo sapiens betaine--homocysteine S-methyltransferase (BHMT), mRNA [NM_001713]	1.54982	2.40025
NM_001102598	CEACAM20	NM_001102598 || CEACAM20 || Homo sapiens carcinoembryonic antigen-related cell adhesion molecule 20 (CEACAM20), transcript variant 4S, mRNA [NM_001102598]	1.54957	0.453256
NM_001206673	ABHD12B	NM_001206673 || ABHD12B || Homo sapiens abhydrolase domain containing 12B (ABHD12B), transcript variant 1, mRNA [NM_001206673]	1.54956	3.06663
NR_038911	MIF-AS1	NR_038911 || MIF-AS1 || Homo sapiens MIF antisense RNA 1 (MIF-AS1), long non-coding RNA [NR_038911]	1.54859	0.145338
NM_024711	GIMAP6	NM_024711 || GIMAP6 || Homo sapiens GTPase, IMAP family member 6 (GIMAP6), transcript variant 1, mRNA [NM_024711]	1.54794	0.961569
NR_024253	FAM86EP	NR_024253 || FAM86EP || Homo sapiens family with sequence similarity 86, member E, pseudogene (FAM86EP), non-coding RNA [NR_024253]	1.54777	1.04276
NM_032892	FRMD5	NM_032892 || FRMD5 || Homo sapiens FERM domain containing 5 (FRMD5), transcript variant 2, mRNA [NM_032892]	1.54774	4.34791
lnc-EDAR-1:1	lnc-EDAR-1	lnc-EDAR-1:1 || lnc-EDAR-1 || LNCipedia lincRNA (lnc-EDAR-1), lincRNA [lnc-EDAR-1:1]	1.54742	4.94107
ENST00000331733	CCDC103	ENST00000331733 || CCDC103 || family with sequence similarity 187, member A [Source:HGNC Symbol;Acc:HGNC:35153] [ENST00000331733]	1.54731	2.40025
NM_001195150	LOC100130705	NM_001195150 || LOC100130705 || Homo sapiens uncharacterized LOC100130705 (LOC100130705), mRNA [NM_001195150]	1.54675	4.34791
NM_006528	TFPI2	NM_006528 || TFPI2 || Homo sapiens tissue factor pathway inhibitor 2 (TFPI2), transcript variant 1, mRNA [NM_006528]	1.54631	0.143671
ENST00000510505		ENST00000510505 || || Unknown	1.54471	6.24009
NM_138420	AHNAK2	NM_138420 || AHNAK2 || Homo sapiens AHNAK nucleoprotein 2 (AHNAK2), mRNA [NM_138420]	1.54442	0.839754
ENST00000526041		ENST00000526041 || || HUM139E05B Human fetal brain (TFujiwara) Homo sapiens cDNA clone GEN-139E05 5', mRNA sequence [D81231]	1.54335	0.546471
NM_002103	GYS1	NM_002103 || GYS1 || Homo sapiens glycogen synthase 1 (muscle) (GYS1), transcript variant 1, mRNA [NM_002103]	1.54313	0.23968
lnc-COIL-3:1	lnc-COIL-3	lnc-COIL-3:1 || lnc-COIL-3 || Homo sapiens cDNA clone IMAGE:5266735. [BC036702]	1.54288	8.7866
NM_001621	AHR	NM_001621 || AHR || Homo sapiens aryl hydrocarbon receptor (AHR), mRNA [NM_001621]	1.54264	0
ENST00000503666		ENST00000503666 || || Unknown	1.54211	0.484148
XR_244768	LOC90768	XR_244768 || LOC90768 || PREDICTED: Homo sapiens uncharacterized LOC101928703 (AC108142.1), ncRNA [XR_244768]	1.54163	7.81615
ENST00000607952		ENST00000607952 || || Q742L2_MYCPA (Q742L2) SerC, partial (7%) [THC2769118]	1.54154	7.58603
lnc-HAPLN3-1:1	lnc-HAPLN3-1	lnc-HAPLN3-1:1 || lnc-HAPLN3-1 || LNCipedia lincRNA (lnc-HAPLN3-1), lincRNA [lnc-HAPLN3-1:1]	1.54081	7.02514
NM_002574	PRDX1	NM_002574 || PRDX1 || Homo sapiens peroxiredoxin 1 (PRDX1), transcript variant 1, mRNA [NM_002574]	1.53953	0
NM_001017973	P4HA2	NM_001017973 || P4HA2 || Homo sapiens prolyl 4-hydroxylase, alpha polypeptide II (P4HA2), transcript variant 2, mRNA [NM_001017973]	1.53906	0.339999
TCONS_l2_00003643	XLOC_l2_002033	TCONS_l2_00003643 || XLOC_l2_002033 || BROAD Institute lincRNA (XLOC_l2_002033), lincRNA [TCONS_l2_00003643]	1.53905	7.58603
ENST00000528497		ENST00000528497 || || Unknown	1.53865	1.71387
lnc-BEST4-1:2	lnc-BEST4-1	lnc-BEST4-1:2 || lnc-BEST4-1 || LNCipedia lincRNA (lnc-BEST4-1), lincRNA [lnc-BEST4-1:2]	1.53793	1.93466
NM_005213	CSTA	NM_005213 || CSTA || Homo sapiens cystatin A (stefin A) (CSTA), mRNA [NM_005213]	1.53722	1.43927
A_33_P3356106		A_33_P3356106 || unmapped	1.53626	2.03028
NM_001080503	CCDC159	NM_001080503 || CCDC159 || Homo sapiens coiled-coil domain containing 159 (CCDC159), mRNA [NM_001080503]	1.53611	1.93466
NM_032788	ZNF514	NM_032788 || ZNF514 || Homo sapiens zinc finger protein 514 (ZNF514), mRNA [NM_032788]	1.53551	2.93491
NM_024310	PLEKHF1	NM_024310 || PLEKHF1 || Homo sapiens pleckstrin homology domain containing, family F (with FYVE domain) member 1 (PLEKHF1), mRNA [NM_024310]	1.53531	1.41773
XR_241604	LOC101928236	XR_241604 || LOC101928236 || PREDICTED: Homo sapiens uncharacterized LOC101928236 (LOC101928236), transcript variant X1, ncRNA [XR_241604]	1.53489	0.573249
NM_001012662	SLC3A2	NM_001012662 || SLC3A2 || Homo sapiens solute carrier family 3 (amino acid transporter heavy chain), member 2 (SLC3A2), transcript variant 2, mRNA [NM_001012662]	1.53394	0.243171
NM_001166579	AANAT	NM_001166579 || AANAT || Homo sapiens aralkylamine N-acetyltransferase (AANAT), transcript variant 1, mRNA [NM_001166579]	1.53219	1.02318
NM_017817	RAB20	NM_017817 || RAB20 || Homo sapiens RAB20, member RAS oncogene family (RAB20), mRNA [NM_017817]	1.53188	0.63476
NM_015099	CAMTA2	NM_015099 || CAMTA2 || Homo sapiens calmodulin binding transcription activator 2 (CAMTA2), transcript variant 1, mRNA [NM_015099]	1.53188	4.34791
A_33_P3418466		A_33_P3418466 || unmapped	1.53173	9.61574
NR_029390	LOC284412	NR_029390 || LOC284412 || Homo sapiens uncharacterized LOC284412 (LOC284412), long non-coding RNA [NR_029390]	1.53154	8.06703
NM_173039	AQP11	NM_173039 || AQP11 || Homo sapiens aquaporin 11 (AQP11), mRNA [NM_173039]	1.52949	7.58603
ENST00000455984	LOC102725370	ENST00000455984 || LOC102725370 || PREDICTED: Homo sapiens uncharacterized LOC102725370 (LOC102725370), transcript variant X3, ncRNA [XR_425587]	1.52914	4.94107
NM_001205288	LIMS3L	NM_001205288 || LIMS3L || Homo sapiens LIM and senescent cell antigen-like domains 3-like (LIMS3L), transcript variant 1, mRNA [NM_001205288]	1.52896	1.34826
ENST00000555299	LOC101929002	ENST00000555299 || LOC101929002 || PREDICTED: Homo sapiens uncharacterized LOC101929002 (LOC101929002), ncRNA [XR_245809]	1.52702	5.09647
NM_003851	CREG1	NM_003851 || CREG1 || Homo sapiens cellular repressor of E1A-stimulated genes 1 (CREG1), mRNA [NM_003851]	1.52674	0.157857
XR_132626	LOC100507131	XR_132626 || LOC100507131 || PREDICTED: Homo sapiens uncharacterized LOC100507131 (LOC100507131), misc_RNA [XR_132626]	1.52604	5.3737
lnc-GRIP1-3:1	lnc-GRIP1-3	lnc-GRIP1-3:1 || lnc-GRIP1-3 || LNCipedia lincRNA (lnc-GRIP1-3), lincRNA [lnc-GRIP1-3:1]	1.52597	1.105
NR_038854	NRAV	NR_038854 || NRAV || Homo sapiens negative regulator of antiviral response (non-protein coding) (NRAV), long non-coding RNA [NR_038854]	1.52572	8.7866
NM_182767	SLC6A15	NM_182767 || SLC6A15 || Homo sapiens solute carrier family 6 (neutral amino acid transporter), member 15 (SLC6A15), transcript variant 1, mRNA [NM_182767]	1.52547	0
ENST00000614082	DNAH10	ENST00000614082 || DNAH10 || dynein, axonemal, heavy chain 10 [Source:HGNC Symbol;Acc:HGNC:2941] [ENST00000614082]	1.52525	0
NM_020362	PITHD1	NM_020362 || PITHD1 || Homo sapiens PITH (C-terminal proteasome-interacting domain of thioredoxin-like) domain containing 1 (PITHD1), mRNA [NM_020362]	1.52485	0.631073
NM_006733	CENPI	NM_006733 || CENPI || Homo sapiens centromere protein I (CENPI), mRNA [NM_006733]	1.52439	2.03028
NR_002223	TPRXL	NR_002223 || TPRXL || Homo sapiens tetra-peptide repeat homeobox-like (TPRXL), non-coding RNA [NR_002223]	1.5231	5.796
NM_021077	NMB	NM_021077 || NMB || Homo sapiens neuromedin B (NMB), transcript variant 1, mRNA [NM_021077]	1.52305	0.172339
NM_052999	CMTM1	NM_052999 || CMTM1 || Homo sapiens CKLF-like MARVEL transmembrane domain containing 1 (CMTM1), transcript variant 17, mRNA [NM_052999]	1.52294	2.20356
NM_138467	TYW3	NM_138467 || TYW3 || Homo sapiens tRNA-yW synthesizing protein 3 homolog (S. cerevisiae) (TYW3), transcript variant 1, mRNA [NM_138467]	1.52292	6.80203
A_33_P3326898		A_33_P3326898 || unmapped	1.52286	7.02514
NM_001017402	LAMB3	NM_001017402 || LAMB3 || Homo sapiens laminin, beta 3 (LAMB3), transcript variant 2, mRNA [NM_001017402]	1.52209	0.327644
NM_001161473	ALDH3B1	NM_001161473 || ALDH3B1 || Homo sapiens aldehyde dehydrogenase 3 family, member B1 (ALDH3B1), transcript variant 3, mRNA [NM_001161473]	1.52182	0.141773
NM_033428	TMEM261	NM_033428 || TMEM261 || Homo sapiens transmembrane protein 261 (TMEM261), mRNA [NM_033428]	1.52171	0
lnc-TRPT1-1:1	lnc-TRPT1-1	lnc-TRPT1-1:1 || lnc-TRPT1-1 || LNCipedia lincRNA (lnc-TRPT1-1), lincRNA [lnc-TRPT1-1:1]	1.51952	2.66656
NM_006006	ZBTB16	NM_006006 || ZBTB16 || Homo sapiens zinc finger and BTB domain containing 16 (ZBTB16), transcript variant 1, mRNA [NM_006006]	1.51857	3.28079
NM_000392	ABCC2	NM_000392 || ABCC2 || Homo sapiens ATP-binding cassette, sub-family C (CFTR/MRP), member 2 (ABCC2), mRNA [NM_000392]	1.51686	5.53417
NM_004177	STX3	NM_004177 || STX3 || Homo sapiens syntaxin 3 (STX3), transcript variant 1, mRNA [NM_004177]	1.51604	0.139665
NM_002692	POLE2	NM_002692 || POLE2 || Homo sapiens polymerase (DNA directed), epsilon 2, accessory subunit (POLE2), transcript variant 1, mRNA [NM_002692]	1.51599	1.1905
L40403	YLPM1	L40403 || YLPM1 || Homo sapiens (clone zap3) mRNA, 3' end of cds. [L40403]	1.51594	7.81615
NM_153217	TMEM174	NM_153217 || TMEM174 || Homo sapiens transmembrane protein 174 (TMEM174), mRNA [NM_153217]	1.514	2.93491
NM_203376	TMEM81	NM_203376 || TMEM81 || Homo sapiens transmembrane protein 81 (TMEM81), mRNA [NM_203376]	1.5136	8.4009
NM_005127	CLEC2B	NM_005127 || CLEC2B || Homo sapiens C-type lectin domain family 2, member B (CLEC2B), mRNA [NM_005127]	1.51269	3.17572
lnc-C11orf44-2:1	lnc-C11orf44-2	lnc-C11orf44-2:1 || lnc-C11orf44-2 || LNCipedia lincRNA (lnc-C11orf44-2), lincRNA [lnc-C11orf44-2:1]	1.51236	0.900524
NM_002204	ITGA3	NM_002204 || ITGA3 || Homo sapiens integrin, alpha 3 (antigen CD49C, alpha 3 subunit of VLA-3 receptor) (ITGA3), transcript variant a, mRNA [NM_002204]	1.51172	0.631073
BC026272	CCNC	BC026272 || CCNC || Homo sapiens cyclin C, mRNA (cDNA clone IMAGE:4250420), partial cds. [BC026272]	1.51121	3.50317
ENST00000491996	RBM44	ENST00000491996 || RBM44 || RNA binding motif protein 44 [Source:HGNC Symbol;Acc:HGNC:24756] [ENST00000491996]	1.51118	1.97949
NM_177964	LYPD6B	NM_177964 || LYPD6B || Homo sapiens LY6/PLAUR domain containing 6B (LYPD6B), mRNA [NM_177964]	1.50855	8.4009
NM_033378	CGB2	NM_033378 || CGB2 || Homo sapiens chorionic gonadotropin, beta polypeptide 2 (CGB2), mRNA [NM_033378]	1.50847	5.99377
NM_014903	NAV3	NM_014903 || NAV3 || Homo sapiens neuron navigator 3 (NAV3), transcript variant 2, mRNA [NM_014903]	1.50783	0.288555
BC037956	TRIP12	BC037956 || TRIP12 || Homo sapiens thyroid hormone receptor interactor 12, mRNA (cDNA clone IMAGE:5742743), with apparent retained intron. [BC037956]	1.50543	0.604665
NR_033995	LOC389247	NR_033995 || LOC389247 || Homo sapiens uncharacterized LOC389247 (LOC389247), long non-coding RNA [NR_033995]	1.50537	3.28079
NM_001423	EMP1	NM_001423 || EMP1 || Homo sapiens epithelial membrane protein 1 (EMP1), mRNA [NM_001423]	1.50503	0.161244
ENST00000480549	SH3D21	ENST00000480549 || SH3D21 || SH3 domain containing 21 [Source:HGNC Symbol;Acc:HGNC:26236] [ENST00000480549]	1.50398	1.1905
NM_003374	VDAC1	NM_003374 || VDAC1 || Homo sapiens voltage-dependent anion channel 1 (VDAC1), transcript variant 1, mRNA [NM_003374]	1.50397	0.145338
lnc-C22orf26-4:1	lnc-C22orf26-4	lnc-C22orf26-4:1 || lnc-C22orf26-4 || LNCipedia lincRNA (lnc-C22orf26-4), lincRNA [lnc-C22orf26-4:1]	1.50359	1.24511
NM_024628	SLC12A8	NM_024628 || SLC12A8 || Homo sapiens solute carrier family 12, member 8 (SLC12A8), transcript variant 1, mRNA [NM_024628]	1.5033	0.523125
NM_000202	IDS	NM_000202 || IDS || Homo sapiens iduronate 2-sulfatase (IDS), transcript variant 1, mRNA [NM_000202]	1.50303	0.573249
A_33_P3278896		A_33_P3278896 || unmapped	1.50128	5.53417
NM_178833	SLC9B2	NM_178833 || SLC9B2 || Homo sapiens solute carrier family 9, subfamily B (NHA2, cation proton antiporter 2), member 2 (SLC9B2), transcript variant 1, mRNA [NM_178833]	1.50121	0.523125
NM_182664	RASSF5	NM_182664 || RASSF5 || Homo sapiens Ras association (RalGDS/AF-6) domain family member 5 (RASSF5), transcript variant 2, mRNA [NM_182664]	1.50101	0.132288
lnc-CD38-3:1	lnc-CD38-3	lnc-CD38-3:1 || lnc-CD38-3 || CR745678 Soares_testis_NHT Homo sapiens cDNA clone IMAGp971N1374 ; IMAGE:1734012 5', mRNA sequence [CR745678]	0.666328	0.235918
lnc-TRAF3IP2-1:1	lnc-TRAF3IP2-1	lnc-TRAF3IP2-1:1 || lnc-TRAF3IP2-1 || LNCipedia lincRNA (lnc-TRAF3IP2-1), lincRNA [lnc-TRAF3IP2-1:1]	0.666301	0.513377
NM_198498	C11orf53	NM_198498 || C11orf53 || Homo sapiens chromosome 11 open reading frame 53 (C11orf53), mRNA [NM_198498]	0.666238	0
NM_003222	TFAP2C	NM_003222 || TFAP2C || Homo sapiens transcription factor AP-2 gamma (activating enhancer binding protein 2 gamma) (TFAP2C), mRNA [NM_003222]	0.666169	7.02514
NM_001012633	IL32	NM_001012633 || IL32 || Homo sapiens interleukin 32 (IL32), transcript variant 4, mRNA [NM_001012633]	0.666169	0.631073
lnc-PAICS-1:1	lnc-PAICS-1	lnc-PAICS-1:1 || lnc-PAICS-1 || Homo sapiens cDNA FLJ42646 fis, clone BRACE3026075. [AK124637]	0.666097	5.796
TCONS_l2_00010812	XLOC_l2_005804	TCONS_l2_00010812 || XLOC_l2_005804 || BROAD Institute lincRNA (XLOC_l2_005804), lincRNA [TCONS_l2_00010812]	0.66608	0.159532
NR_003612	FAM92A1P2	NR_003612 || FAM92A1P2 || Homo sapiens family with sequence similarity 92, member A1 pseudogene 2 (FAM92A1P2), non-coding RNA [NR_003612]	0.66585	2.93491
NM_032291	SGIP1	NM_032291 || SGIP1 || Homo sapiens SH3-domain GRB2-like (endophilin) interacting protein 1 (SGIP1), mRNA [NM_032291]	0.66584	1.105
NR_024193	HILS1	NR_024193 || HILS1 || Homo sapiens histone linker H1 domain, spermatid-specific 1, pseudogene (HILS1), transcript variant 1, non-coding RNA [NR_024193]	0.665813	0.732131
NM_012134	LMOD1	NM_012134 || LMOD1 || Homo sapiens leiomodin 1 (smooth muscle) (LMOD1), mRNA [NM_012134]	0.665719	0.0875754
lnc-LCN6-1:3	lnc-LCN6-1	lnc-LCN6-1:3 || lnc-LCN6-1 || Homo sapiens cDNA FLJ30346 fis, clone BRACE2007527. [AK054908]	0.665651	3.28079
XR_424828	LOC339192	XR_424828 || LOC339192 || PREDICTED: Homo sapiens uncharacterized LOC339192 (LOC339192), transcript variant X2, ncRNA [XR_424828]	0.665635	3.89407
NR_111913	CYB561D2	NR_111913 || CYB561D2 || Homo sapiens cytochrome b561 family, member D2 (CYB561D2), transcript variant 4, non-coding RNA [NR_111913]	0.665608	0.937511
NM_153487	MDGA1	NM_153487 || MDGA1 || Homo sapiens MAM domain containing glycosylphosphatidylinositol anchor 1 (MDGA1), mRNA [NM_153487]	0.665565	0.604665
NM_194312	ESPNL	NM_194312 || ESPNL || Homo sapiens espin-like (ESPNL), mRNA [NM_194312]	0.665548	0.323878
NM_213636	PDLIM7	NM_213636 || PDLIM7 || Homo sapiens PDZ and LIM domain 7 (enigma) (PDLIM7), transcript variant 4, mRNA [NM_213636]	0.665509	0.256888
NR_027341	LINC00475	NR_027341 || LINC00475 || Homo sapiens long intergenic non-protein coding RNA 475 (LINC00475), long non-coding RNA [NR_027341]	0.665478	0.238539
AF318328	PP12719	AF318328 || PP12719 || Homo sapiens pp12719 mRNA, complete cds. [AF318328]	0.665437	3.28079
NM_004497	FOXA3	NM_004497 || FOXA3 || Homo sapiens forkhead box A3 (FOXA3), mRNA [NM_004497]	0.665415	5.99377
NM_014902	DLGAP4	NM_014902 || DLGAP4 || Homo sapiens discs, large (Drosophila) homolog-associated protein 4 (DLGAP4), transcript variant 1, mRNA [NM_014902]	0.665074	1.02318
NM_005308	GRK5	NM_005308 || GRK5 || Homo sapiens G protein-coupled receptor kinase 5 (GRK5), mRNA [NM_005308]	0.66497	0.145338
NM_152899	IL4I1	NM_152899 || IL4I1 || Homo sapiens interleukin 4 induced 1 (IL4I1), transcript variant 1, mRNA [NM_152899]	0.664921	0.331987
XR_241967	LOC101928004	XR_241967 || LOC101928004 || PREDICTED: Homo sapiens uncharacterized LOC101928004 (LOC101928004), transcript variant X2, ncRNA [XR_241967]	0.664892	4.34791
NR_002561	SNORD30	NR_002561 || SNORD30 || Homo sapiens small nucleolar RNA, C/D box 30 (SNORD30), small nucleolar RNA [NR_002561]	0.664783	4.34791
TCONS_l2_00008603	XLOC_l2_004640	TCONS_l2_00008603 || XLOC_l2_004640 || BROAD Institute lincRNA (XLOC_l2_004640), lincRNA [TCONS_l2_00008603]	0.664438	8.4009
lnc-PLEKHB1-1:1	lnc-PLEKHB1-1	lnc-PLEKHB1-1:1 || lnc-PLEKHB1-1 || xq70c10.x1 NCI_CGAP_HN7 Homo sapiens cDNA clone IMAGE:2755986 3' similar to contains Alu repetitive element;, mRNA sequence [AW265493]	0.664332	7.81615
NM_001100164	PHACTR2	NM_001100164 || PHACTR2 || Homo sapiens phosphatase and actin regulator 2 (PHACTR2), transcript variant 1, mRNA [NM_001100164]	0.664259	0.883581
ENST00000442197		ENST00000442197 || || AU253022 human favorable neuroblastoma cDNA Homo sapiens cDNA clone Nbla03375 5', mRNA sequence [AU253022]	0.664162	0.23968
NM_014461	CNTN6	NM_014461 || CNTN6 || Homo sapiens contactin 6 (CNTN6), transcript variant 1, mRNA [NM_014461]	0.664018	7.02514
NM_001098517	CADM1	NM_001098517 || CADM1 || Homo sapiens cell adhesion molecule 1 (CADM1), transcript variant 2, mRNA [NM_001098517]	0.663975	0.256888
NM_023922	TAS2R14	NM_023922 || TAS2R14 || Homo sapiens taste receptor, type 2, member 14 (TAS2R14), mRNA [NM_023922]	0.663972	3.28079
NM_005532	IFI27	NM_005532 || IFI27 || Homo sapiens interferon, alpha-inducible protein 27 (IFI27), transcript variant 2, mRNA [NM_005532]	0.663937	1.29369
NR_002815	TPTE2P6	NR_002815 || TPTE2P6 || Homo sapiens transmembrane phosphoinositide 3-phosphatase and tensin homolog 2 pseudogene 6 (TPTE2P6), non-coding RNA [NR_002815]	0.663743	5.3737
lnc-C4orf42-1:6	lnc-C4orf42-1	lnc-C4orf42-1:6 || lnc-C4orf42-1 || Homo sapiens cDNA FLJ34123 fis, clone FCBBF3009978. [AK091442]	0.663736	4.1832
NM_001017534	CARD16	NM_001017534 || CARD16 || Homo sapiens caspase recruitment domain family, member 16 (CARD16), transcript variant 1, mRNA [NM_001017534]	0.663436	0.235918
NM_006152	LRMP	NM_006152 || LRMP || Homo sapiens lymphoid-restricted membrane protein (LRMP), transcript variant 1, mRNA [NM_006152]	0.663416	5.99377
NM_005900	SMAD1	NM_005900 || SMAD1 || Homo sapiens SMAD family member 1 (SMAD1), transcript variant 1, mRNA [NM_005900]	0.663391	0
NM_000820	GAS6	NM_000820 || GAS6 || Homo sapiens growth arrest-specific 6 (GAS6), mRNA [NM_000820]	0.663067	0.159532
ENST00000551450		ENST00000551450 || || Unknown	0.662995	0.150883
NM_006288	THY1	NM_006288 || THY1 || Homo sapiens Thy-1 cell surface antigen (THY1), mRNA [NM_006288]	0.662918	0.25428
NM_020925	CACHD1	NM_020925 || CACHD1 || Homo sapiens cache domain containing 1 (CACHD1), transcript variant 1, mRNA [NM_020925]	0.66242	0.753658
lnc-QPCT-3:4	lnc-QPCT-3	lnc-QPCT-3:4 || lnc-QPCT-3 || LNCipedia lincRNA (lnc-QPCT-3), lincRNA [lnc-QPCT-3:4]	0.662402	8.4009
NM_001077183	TSC2	NM_001077183 || TSC2 || Homo sapiens tuberous sclerosis 2 (TSC2), transcript variant 4, mRNA [NM_001077183]	0.662389	4.55297
NM_025211	GKAP1	NM_025211 || GKAP1 || Homo sapiens G kinase anchoring protein 1 (GKAP1), transcript variant 1, mRNA [NM_025211]	0.662307	0.839754
NM_014353	RAB26	NM_014353 || RAB26 || Homo sapiens RAB26, member RAS oncogene family (RAB26), mRNA [NM_014353]	0.662196	0
NM_002508	NID1	NM_002508 || NID1 || Homo sapiens nidogen 1 (NID1), mRNA [NM_002508]	0.66212	0.631073
NM_002083	GPX2	NM_002083 || GPX2 || Homo sapiens glutathione peroxidase 2 (gastrointestinal) (GPX2), transcript variant 1, mRNA [NM_002083]	0.66209	7.02514
NM_080614	WFDC3	NM_080614 || WFDC3 || Homo sapiens WAP four-disulfide core domain 3 (WFDC3), mRNA [NM_080614]	0.662054	0.573249
NM_001286123	SLC17A2	NM_001286123 || SLC17A2 || Homo sapiens solute carrier family 17, member 2 (SLC17A2), transcript variant 1, mRNA [NM_001286123]	0.661989	0.256888
NM_181785	SLC46A3	NM_181785 || SLC46A3 || Homo sapiens solute carrier family 46, member 3 (SLC46A3), transcript variant 1, mRNA [NM_181785]	0.661838	4.82419
NM_004495	NRG1	NM_004495 || NRG1 || Homo sapiens neuregulin 1 (NRG1), transcript variant HRG-gamma, mRNA [NM_004495]	0.661804	2.08097
NM_000948	PRL	NM_000948 || PRL || Homo sapiens prolactin (PRL), transcript variant 1, mRNA [NM_000948]	0.661605	9.23036
ENST00000497896		ENST00000497896 || || Unknown	0.661528	0.405613
NM_001144978	MTHFD2L	NM_001144978 || MTHFD2L || Homo sapiens methylenetetrahydrofolate dehydrogenase (NADP+ dependent) 2-like (MTHFD2L), mRNA [NM_001144978]	0.661458	2.29913
NR_003216	SNORD114-23	NR_003216 || SNORD114-23 || Homo sapiens small nucleolar RNA, C/D box 114-23 (SNORD114-23), small nucleolar RNA [NR_003216]	0.661349	0.143671
NM_003944	SELENBP1	NM_003944 || SELENBP1 || Homo sapiens selenium binding protein 1 (SELENBP1), transcript variant 1, mRNA [NM_003944]	0.661258	0.167349
NM_001165	BIRC3	NM_001165 || BIRC3 || Homo sapiens baculoviral IAP repeat containing 3 (BIRC3), transcript variant 1, mRNA [NM_001165]	0.661094	1.1905
NM_001257273	ZNF451	NM_001257273 || ZNF451 || Homo sapiens zinc finger protein 451 (ZNF451), transcript variant 3, mRNA [NM_001257273]	0.660932	1.03923
ENST00000468376	ZMYND8	ENST00000468376 || ZMYND8 || zinc finger, MYND-type containing 8 [Source:HGNC Symbol;Acc:HGNC:9397] [ENST00000468376]	0.660844	2.50909
NM_022359	PDE4DIP	NM_022359 || PDE4DIP || Homo sapiens phosphodiesterase 4D interacting protein (PDE4DIP), transcript variant 3, mRNA [NM_022359]	0.660837	0.145338
NM_006329	FBLN5	NM_006329 || FBLN5 || Homo sapiens fibulin 5 (FBLN5), mRNA [NM_006329]	0.660777	0.0879856
BG927974		BG927974 || || HNC45-1-G12.R HNC (Human Normal Cartilage) Homo sapiens cDNA, mRNA sequence [BG927974]	0.660485	3.28079
NM_001042454	TGFB1I1	NM_001042454 || TGFB1I1 || Homo sapiens transforming growth factor beta 1 induced transcript 1 (TGFB1I1), transcript variant 1, mRNA [NM_001042454]	0.660244	0
ENST00000414404	LOC644838	ENST00000414404 || LOC644838 || Unknown	0.660163	0.25428
NM_005734	HIPK3	NM_005734 || HIPK3 || Homo sapiens homeodomain interacting protein kinase 3 (HIPK3), transcript variant 1, mRNA [NM_005734]	0.660104	4.94107
NM_033110	GGACT	NM_033110 || GGACT || Homo sapiens gamma-glutamylamine cyclotransferase (GGACT), transcript variant 1, mRNA [NM_033110]	0.65991	0.327644
lnc-MTIF3-1:1	lnc-MTIF3-1	lnc-MTIF3-1:1 || lnc-MTIF3-1 || LNCipedia lincRNA (lnc-MTIF3-1), lincRNA [lnc-MTIF3-1:1]	0.659645	2.40025
NM_002084	GPX3	NM_002084 || GPX3 || Homo sapiens glutathione peroxidase 3 (plasma) (GPX3), mRNA [NM_002084]	0.659615	0.513377
ENST00000481658	FAM117B	ENST00000481658 || FAM117B || family with sequence similarity 117, member B [Source:HGNC Symbol;Acc:HGNC:14440] [ENST00000481658]	0.659527	1.1905
NM_001282936	STIL	NM_001282936 || STIL || Homo sapiens SCL/TAL1 interrupting locus (STIL), transcript variant 3, mRNA [NM_001282936]	0.659125	1.1905
NM_178232	HAPLN3	NM_178232 || HAPLN3 || Homo sapiens hyaluronan and proteoglycan link protein 3 (HAPLN3), mRNA [NM_178232]	0.658824	0
NR_024607	MIR503HG	NR_024607 || MIR503HG || Homo sapiens MIR503 host gene (non-protein coding) (MIR503HG), long non-coding RNA [NR_024607]	0.658807	0.167349
NM_007048	BTN3A1	NM_007048 || BTN3A1 || Homo sapiens butyrophilin, subfamily 3, member A1 (BTN3A1), transcript variant 1, mRNA [NM_007048]	0.65835	0
NM_015107	PHF8	NM_015107 || PHF8 || Homo sapiens PHD finger protein 8 (PHF8), transcript variant 2, mRNA [NM_015107]	0.658079	1.45997
XR_425258	C20orf181	XR_425258 || C20orf181 || PREDICTED: Homo sapiens chromosome 20 open reading frame 181 (C20orf181), misc_RNA [XR_425258]	0.657983	1.93466
NM_000928	PLA2G1B	NM_000928 || PLA2G1B || Homo sapiens phospholipase A2, group IB (pancreas) (PLA2G1B), mRNA [NM_000928]	0.657945	4.94107
lnc-ASB4-3:2	lnc-ASB4-3	lnc-ASB4-3:2 || lnc-ASB4-3 || LNCipedia lincRNA (lnc-ASB4-3), lincRNA [lnc-ASB4-3:2]	0.657938	0.238539
NM_005665	EVI5	NM_005665 || EVI5 || Homo sapiens ecotropic viral integration site 5 (EVI5), mRNA [NM_005665]	0.657908	0.63476
NM_002800	PSMB9	NM_002800 || PSMB9 || Homo sapiens proteasome (prosome, macropain) subunit, beta type, 9 (PSMB9), mRNA [NM_002800]	0.657895	0.256888
NM_016948	PARD6A	NM_016948 || PARD6A || Homo sapiens par-6 family cell polarity regulator alpha (PARD6A), transcript variant 1, mRNA [NM_016948]	0.657804	3.89407
NM_000930	PLAT	NM_000930 || PLAT || Homo sapiens plasminogen activator, tissue (PLAT), transcript variant 1, mRNA [NM_000930]	0.657777	0
NM_004572	PKP2	NM_004572 || PKP2 || Homo sapiens plakophilin 2 (PKP2), transcript variant 2b, mRNA [NM_004572]	0.657645	0.157857
NM_005406	ROCK1	NM_005406 || ROCK1 || Homo sapiens Rho-associated, coiled-coil containing protein kinase 1 (ROCK1), mRNA [NM_005406]	0.657616	0.732131
ENST00000416689	SLC2A1-AS1	ENST00000416689 || SLC2A1-AS1 || SLC2A1 antisense RNA 1 [Source:HGNC Symbol;Acc:HGNC:44187] [ENST00000416689]	0.65753	0
NM_001024465	SOD2	NM_001024465 || SOD2 || Homo sapiens superoxide dismutase 2, mitochondrial (SOD2), transcript variant 2, mRNA [NM_001024465]	0.65721	0.141773
NM_020819	FAM135A	NM_020819 || FAM135A || Homo sapiens family with sequence similarity 135, member A (FAM135A), transcript variant 2, mRNA [NM_020819]	0.657182	1.71387
ENST00000419664		ENST00000419664 || || Unknown	0.65692	0
NM_005940	MMP11	NM_005940 || MMP11 || Homo sapiens matrix metallopeptidase 11 (stromelysin 3) (MMP11), mRNA [NM_005940]	0.656811	0.537993
NM_025031	C7orf69	NM_025031 || C7orf69 || Homo sapiens chromosome 7 open reading frame 69 (C7orf69), transcript variant 1, mRNA [NM_025031]	0.656755	7.30408
NM_001017915	INPP5D	NM_001017915 || INPP5D || Homo sapiens inositol polyphosphate-5-phosphatase, 145kDa (INPP5D), transcript variant 1, mRNA [NM_001017915]	0.656605	1.04276
NM_002286	LAG3	NM_002286 || LAG3 || Homo sapiens lymphocyte-activation gene 3 (LAG3), mRNA [NM_002286]	0.656599	1.00009
A_33_P3223111		A_33_P3223111 || unmapped	0.656441	3.06663
NM_001448	GPC4	NM_001448 || GPC4 || Homo sapiens glypican 4 (GPC4), mRNA [NM_001448]	0.656382	0.331987
NM_001105539	ZBTB10	NM_001105539 || ZBTB10 || Homo sapiens zinc finger and BTB domain containing 10 (ZBTB10), transcript variant 1, mRNA [NM_001105539]	0.65583	5.796
NM_021109	TMSB4X	NM_021109 || TMSB4X || Homo sapiens thymosin beta 4, X-linked (TMSB4X), mRNA [NM_021109]	0.655819	0.155892
lnc-ZNF804A-1:6	lnc-ZNF804A-1	lnc-ZNF804A-1:6 || lnc-ZNF804A-1 || LNCipedia lincRNA (lnc-ZNF804A-1), lincRNA [lnc-ZNF804A-1:6]	0.65533	3.89407
ENST00000451108		ENST00000451108 || || AGENCOURT_10424154 NIH_MGC_79 Homo sapiens cDNA clone IMAGE:6663242 5', mRNA sequence [BU929411]	0.655321	1.71387
NM_013357	PURG	NM_013357 || PURG || Homo sapiens purine-rich element binding protein G (PURG), transcript variant A, mRNA [NM_013357]	0.654705	3.94553
NM_016519	AMBN	NM_016519 || AMBN || Homo sapiens ameloblastin (enamel matrix protein) (AMBN), mRNA [NM_016519]	0.654664	7.81615
ENST00000484028		ENST00000484028 || || MORC family CW-type zinc finger 3 [Source:HGNC Symbol;Acc:HGNC:23572] [ENST00000484028]	0.654585	0.247577
lnc-GLRB-2:1	lnc-GLRB-2	lnc-GLRB-2:1 || lnc-GLRB-2 || LNCipedia lincRNA (lnc-GLRB-2), lincRNA [lnc-GLRB-2:1]	0.654536	3.50317
ENST00000439058	LOC100506098	ENST00000439058 || LOC100506098 || PREDICTED: Homo sapiens uncharacterized LOC100506098 (LOC100506098), transcript variant X3, ncRNA [XR_108746]	0.654387	5.09647
lnc-IL23A-2:1	lnc-IL23A-2	lnc-IL23A-2:1 || lnc-IL23A-2 || LNCipedia lincRNA (lnc-IL23A-2), lincRNA [lnc-IL23A-2:1]	0.654195	1.58239
NM_133638	ADAMTS19	NM_133638 || ADAMTS19 || Homo sapiens ADAM metallopeptidase with thrombospondin type 1 motif, 19 (ADAMTS19), mRNA [NM_133638]	0.654084	6.42066
ENST00000553247		ENST00000553247 || || Unknown	0.653887	8.4009
NM_148962	OXER1	NM_148962 || OXER1 || Homo sapiens oxoeicosanoid (OXE) receptor 1 (OXER1), mRNA [NM_148962]	0.653784	1.60172
NM_153252	BRWD3	NM_153252 || BRWD3 || Homo sapiens bromodomain and WD repeat domain containing 3 (BRWD3), mRNA [NM_153252]	0.653486	1.93466
A_21_P0014771		A_21_P0014771 || unmapped	0.653458	1.05182
NM_016817	OAS2	NM_016817 || OAS2 || Homo sapiens 2'-5'-oligoadenylate synthetase 2, 69/71kDa (OAS2), transcript variant 1, mRNA [NM_016817]	0.653434	4.1832
XR_241131	LOC101928101	XR_241131 || LOC101928101 || PREDICTED: Homo sapiens uncharacterized LOC101928101 (LOC101928101), ncRNA [XR_241131]	0.653432	2.29913
NM_031919	FSD1L	NM_031919 || FSD1L || Homo sapiens fibronectin type III and SPRY domain containing 1-like (FSD1L), transcript variant 2, mRNA [NM_031919]	0.653379	5.09647
NM_000448	RAG1	NM_000448 || RAG1 || Homo sapiens recombination activating gene 1 (RAG1), mRNA [NM_000448]	0.653308	3.17572
NM_153000	APCDD1	NM_153000 || APCDD1 || Homo sapiens adenomatosis polyposis coli down-regulated 1 (APCDD1), mRNA [NM_153000]	0.653286	0.256888
ENST00000429602	SIMC1	ENST00000429602 || SIMC1 || SUMO-interacting motifs containing 1 [Source:HGNC Symbol;Acc:HGNC:24779] [ENST00000429602]	0.653126	1.04276
NM_003105	SORL1	NM_003105 || SORL1 || Homo sapiens sortilin-related receptor, L(DLR class) A repeats containing (SORL1), mRNA [NM_003105]	0.653086	0.491109
lnc-ANTXRL-2:1	lnc-ANTXRL-2	lnc-ANTXRL-2:1 || lnc-ANTXRL-2 || Homo sapiens cDNA clone IMAGE:4825811. [BC031882]	0.652936	7.02514
lnc-LYPLAL1-3:2	lnc-LYPLAL1-3	lnc-LYPLAL1-3:2 || lnc-LYPLAL1-3 || LNCipedia lincRNA (lnc-LYPLAL1-3), lincRNA [lnc-LYPLAL1-3:2]	0.652923	0.23968
lnc-TM2D3-1:2	lnc-TM2D3-1	lnc-TM2D3-1:2 || lnc-TM2D3-1 || LNCipedia lincRNA (lnc-TM2D3-1), lincRNA [lnc-TM2D3-1:2]	0.652661	3.50317
lnc-TCEANC2-1:1	lnc-TCEANC2-1	lnc-TCEANC2-1:1 || lnc-TCEANC2-1 || LNCipedia lincRNA (lnc-TCEANC2-1), lincRNA [lnc-TCEANC2-1:1]	0.652636	2.29913
NR_109874	LOC101927100	NR_109874 || LOC101927100 || Homo sapiens uncharacterized LOC101927100 (LOC101927100), transcript variant 1, long non-coding RNA [NR_109874]	0.65252	0.418606
lnc-TTC21A-1:1	lnc-TTC21A-1	lnc-TTC21A-1:1 || lnc-TTC21A-1 || LNCipedia lincRNA (lnc-TTC21A-1), lincRNA [lnc-TTC21A-1:1]	0.652457	0.937511
NM_003290	TPM4	NM_003290 || TPM4 || Homo sapiens tropomyosin 4 (TPM4), transcript variant Tpm4.2, mRNA [NM_003290]	0.652454	0.491109
NM_145728	SYNM	NM_145728 || SYNM || Homo sapiens synemin, intermediate filament protein (SYNM), transcript variant A, mRNA [NM_145728]	0.652357	1.84524
NM_020957	PCDHB16	NM_020957 || PCDHB16 || Homo sapiens protocadherin beta 16 (PCDHB16), mRNA [NM_020957]	0.652229	0.937511
BC050402	PAXIP1-AS2	BC050402 || PAXIP1-AS2 || Homo sapiens, clone IMAGE:5745756, mRNA. [BC050402]	0.652133	2.29913
NM_001400	S1PR1	NM_001400 || S1PR1 || Homo sapiens sphingosine-1-phosphate receptor 1 (S1PR1), mRNA [NM_001400]	0.652105	1.60172
THC2680609		THC2680609 || || Unknown	0.652084	3.50317
NR_110086	LOC101927497	NR_110086 || LOC101927497 || Homo sapiens uncharacterized LOC101927497 (LOC101927497), transcript variant 1, long non-coding RNA [NR_110086]	0.652072	0.331987
A_33_P3250263		A_33_P3250263 || unmapped	0.651818	0.0890281
ENST00000405068	EXOC7	ENST00000405068 || EXOC7 || exocyst complex component 7 [Source:HGNC Symbol;Acc:HGNC:23214] [ENST00000405068]	0.651802	3.68079
NM_207577	MAP6	NM_207577 || MAP6 || Homo sapiens microtubule-associated protein 6 (MAP6), transcript variant 2, mRNA [NM_207577]	0.65128	0.70517
NM_004370	COL12A1	NM_004370 || COL12A1 || Homo sapiens collagen, type XII, alpha 1 (COL12A1), transcript variant long, mRNA [NM_004370]	0.651042	0.411161
ENST00000538294	LOC100507065	ENST00000538294 || LOC100507065 || Unknown	0.650883	1.09198
A_33_P3236213		A_33_P3236213 || unmapped	0.650751	0.327644
NM_005012	ROR1	NM_005012 || ROR1 || Homo sapiens receptor tyrosine kinase-like orphan receptor 1 (ROR1), transcript variant 1, mRNA [NM_005012]	0.650418	0.139665
NM_001172831	ZNF300	NM_001172831 || ZNF300 || Homo sapiens zinc finger protein 300 (ZNF300), transcript variant 1, mRNA [NM_001172831]	0.650409	3.8006
NM_003551	NME5	NM_003551 || NME5 || Homo sapiens NME/NM23 family member 5 (NME5), mRNA [NM_003551]	0.650366	7.30408
NM_024749	VASH2	NM_024749 || VASH2 || Homo sapiens vasohibin 2 (VASH2), transcript variant 1, mRNA [NM_024749]	0.650319	1.04276
NM_002009	FGF7	NM_002009 || FGF7 || Homo sapiens fibroblast growth factor 7 (FGF7), mRNA [NM_002009]	0.650096	0.157857
NM_001145031	PLAU	NM_001145031 || PLAU || Homo sapiens plasminogen activator, urokinase (PLAU), transcript variant 2, mRNA [NM_001145031]	0.649151	0.537993
NM_152219	GJD3	NM_152219 || GJD3 || Homo sapiens gap junction protein, delta 3, 31.9kDa (GJD3), mRNA [NM_152219]	0.649116	1.41773
AL137758	LOC145945	AL137758 || LOC145945 || Homo sapiens mRNA; cDNA DKFZp434H245 (from clone DKFZp434H245). [AL137758]	0.648704	2.93491
NM_001013258	ZNF789	NM_001013258 || ZNF789 || Homo sapiens zinc finger protein 789 (ZNF789), transcript variant 2, mRNA [NM_001013258]	0.648643	1.29369
lnc-ZNF2-1:2	lnc-ZNF2-1	lnc-ZNF2-1:2 || lnc-ZNF2-1 || LNCipedia lincRNA (lnc-ZNF2-1), lincRNA [lnc-ZNF2-1:2]	0.648525	2.40025
XR_110530	LOC100507165	XR_110530 || LOC100507165 || PREDICTED: Homo sapiens uncharacterized LOC100507165 (LOC100507165), ncRNA [XR_110530]	0.647693	0.172339
lnc-RP11-429E11.3.1-1:1	lnc-RP11-429E11.3.1-1	lnc-RP11-429E11.3.1-1:1 || lnc-RP11-429E11.3.1-1 || LNCipedia lincRNA (lnc-RP11-429E11.3.1-1), lincRNA [lnc-RP11-429E11.3.1-1:1]	0.647659	2.40025
THC2481061		THC2481061 || || HSU07000 breakpoint cluster region protein {Homo sapiens} (exp=-1; wgp=0; cg=0), partial (11%) [THC2481061]	0.647469	1.41773
NM_002826	QSOX1	NM_002826 || QSOX1 || Homo sapiens quiescin Q6 sulfhydryl oxidase 1 (QSOX1), transcript variant 1, mRNA [NM_002826]	0.647029	0
NM_002425	MMP10	NM_002425 || MMP10 || Homo sapiens matrix metallopeptidase 10 (stromelysin 2) (MMP10), mRNA [NM_002425]	0.646987	0.0879856
NM_145239	PRRT2	NM_145239 || PRRT2 || Homo sapiens proline-rich transmembrane protein 2 (PRRT2), transcript variant 1, mRNA [NM_145239]	0.646909	0.172339
NR_003201	SNORD114-9	NR_003201 || SNORD114-9 || Homo sapiens small nucleolar RNA, C/D box 114-9 (SNORD114-9), small nucleolar RNA [NR_003201]	0.646772	0.0890281
NR_002982	SNORA54	NR_002982 || SNORA54 || Homo sapiens small nucleolar RNA, H/ACA box 54 (SNORA54), small nucleolar RNA [NR_002982]	0.646452	6.80203
ENST00000416350		ENST00000416350 || || Unknown	0.646382	0.172339
lnc-LRIG2-3:1	lnc-LRIG2-3	lnc-LRIG2-3:1 || lnc-LRIG2-3 || Homo sapiens cDNA clone IMAGE:4798168. [BC030759]	0.645927	3.50317
NM_001077244	GRIA4	NM_001077244 || GRIA4 || Homo sapiens glutamate receptor, ionotropic, AMPA 4 (GRIA4), transcript variant 3, mRNA [NM_001077244]	0.645829	1.105
ENST00000455913	TLE4	ENST00000455913 || TLE4 || transducin-like enhancer of split 4 [Source:HGNC Symbol;Acc:HGNC:11840] [ENST00000455913]	0.645722	4.34791
NM_005458	GABBR2	NM_005458 || GABBR2 || Homo sapiens gamma-aminobutyric acid (GABA) B receptor, 2 (GABBR2), mRNA [NM_005458]	0.645634	0.150883
BC034282	LOC730961	BC034282 || LOC730961 || Homo sapiens cDNA clone IMAGE:4826905. [BC034282]	0.64548	7.81615
NM_001080480	MBOAT1	NM_001080480 || MBOAT1 || Homo sapiens membrane bound O-acyltransferase domain containing 1 (MBOAT1), transcript variant 1, mRNA [NM_001080480]	0.645347	1.09198
NM_000623	BDKRB2	NM_000623 || BDKRB2 || Homo sapiens bradykinin receptor B2 (BDKRB2), mRNA [NM_000623]	0.645346	0.141773
NM_000364	TNNT2	NM_000364 || TNNT2 || Homo sapiens troponin T type 2 (cardiac) (TNNT2), transcript variant 1, mRNA [NM_000364]	0.645324	4.1832
NM_004385	VCAN	NM_004385 || VCAN || Homo sapiens versican (VCAN), transcript variant 1, mRNA [NM_004385]	0.645263	0.256888
lnc-C14orf37-1:1	lnc-C14orf37-1	lnc-C14orf37-1:1 || lnc-C14orf37-1 || Homo sapiens cDNA clone IMAGE:5276765. [BC031314]	0.644935	1.15956
NM_199454	PRDM16	NM_199454 || PRDM16 || Homo sapiens PR domain containing 16 (PRDM16), transcript variant 2, mRNA [NM_199454]	0.644734	3.89407
NM_003033	ST3GAL1	NM_003033 || ST3GAL1 || Homo sapiens ST3 beta-galactoside alpha-2,3-sialyltransferase 1 (ST3GAL1), transcript variant 1, mRNA [NM_003033]	0.644406	0
NM_001159524	ZNF735	NM_001159524 || ZNF735 || Homo sapiens zinc finger protein 735 (ZNF735), mRNA [NM_001159524]	0.644212	5.796
NM_015559	SETBP1	NM_015559 || SETBP1 || Homo sapiens SET binding protein 1 (SETBP1), transcript variant 1, mRNA [NM_015559]	0.644061	0.167349
NM_153023	SPATA13	NM_153023 || SPATA13 || Homo sapiens spermatogenesis associated 13 (SPATA13), transcript variant 2, mRNA [NM_153023]	0.644039	1.105
NM_001025266	C3orf70	NM_001025266 || C3orf70 || Homo sapiens chromosome 3 open reading frame 70 (C3orf70), mRNA [NM_001025266]	0.643933	3.68079
NM_182762	MACC1	NM_182762 || MACC1 || Homo sapiens metastasis associated in colon cancer 1 (MACC1), mRNA [NM_182762]	0.643883	0.172339
NM_198859	PRICKLE2	NM_198859 || PRICKLE2 || Homo sapiens prickle homolog 2 (Drosophila) (PRICKLE2), mRNA [NM_198859]	0.64385	0.161244
NM_003545	HIST1H4E	NM_003545 || HIST1H4E || Homo sapiens histone cluster 1, H4e (HIST1H4E), mRNA [NM_003545]	0.643778	1.24511
AY358688	LOC100133299	AY358688 || LOC100133299 || Homo sapiens clone DNA62312 GALI1870 (UNQ1870) mRNA, complete cds. [AY358688]	0.643292	8.4009
NM_001649	SHROOM2	NM_001649 || SHROOM2 || Homo sapiens shroom family member 2 (SHROOM2), mRNA [NM_001649]	0.643236	2.24564
NM_001281463	SMC1A	NM_001281463 || SMC1A || Homo sapiens structural maintenance of chromosomes 1A (SMC1A), transcript variant 2, mRNA [NM_001281463]	0.642632	1.34826
NM_018387	STRBP	NM_018387 || STRBP || Homo sapiens spermatid perinuclear RNA binding protein (STRBP), transcript variant 1, mRNA [NM_018387]	0.642123	0
A_33_P3255824		A_33_P3255824 || unmapped	0.641857	1.09198
lnc-GTF2F2-2:14	lnc-GTF2F2-2	lnc-GTF2F2-2:14 || lnc-GTF2F2-2 || LNCipedia lincRNA (lnc-GTF2F2-2), lincRNA [lnc-GTF2F2-2:14]	0.641556	2.50909
NM_133631	ROBO1	NM_133631 || ROBO1 || Homo sapiens roundabout, axon guidance receptor, homolog 1 (Drosophila) (ROBO1), transcript variant 2, mRNA [NM_133631]	0.641402	1.97949
NM_018012	KIF26B	NM_018012 || KIF26B || Homo sapiens kinesin family member 26B (KIF26B), mRNA [NM_018012]	0.640816	3.94553
NR_125882	LOC100507487	NR_125882 || LOC100507487 || Homo sapiens uncharacterized LOC100507487 (LOC100507487), long non-coding RNA [NR_125882]	0.640504	5.53417
XM_006709929	LOC101060157	XM_006709929 || LOC101060157 || PREDICTED: Homo sapiens mucin-19-like (LOC101060157), mRNA [XM_006709929]	0.640485	2.50909
lnc-HERPUD2-1:2	lnc-HERPUD2-1	lnc-HERPUD2-1:2 || lnc-HERPUD2-1 || LNCipedia lincRNA (lnc-HERPUD2-1), lincRNA [lnc-HERPUD2-1:2]	0.640038	9.23036
ENST00000391625		ENST00000391625 || || Homo sapiens cDNA FLJ44385 fis, clone TRACH3036456. [AK126356]	0.639763	3.17572
NM_173505	ANKRD29	NM_173505 || ANKRD29 || Homo sapiens ankyrin repeat domain 29 (ANKRD29), mRNA [NM_173505]	0.639564	1.60172
NM_031419	NFKBIZ	NM_031419 || NFKBIZ || Homo sapiens nuclear factor of kappa light polypeptide gene enhancer in B-cells inhibitor, zeta (NFKBIZ), transcript variant 1, mRNA [NM_031419]	0.639443	0.753658
NM_004297	GNA14	NM_004297 || GNA14 || Homo sapiens guanine nucleotide binding protein (G protein), alpha 14 (GNA14), mRNA [NM_004297]	0.639345	0
ENST00000569008		ENST00000569008 || || Homo sapiens cDNA FLJ37202 fis, clone BRALZ2006734. [AK094521]	0.639136	2.29913
ENST00000441283		ENST00000441283 || || long intergenic non-protein coding RNA 313 [Source:HGNC Symbol;Acc:HGNC:16416] [ENST00000441283]	0.638888	1.61939
NM_003108	SOX11	NM_003108 || SOX11 || Homo sapiens SRY (sex determining region Y)-box 11 (SOX11), mRNA [NM_003108]	0.638789	0.339999
NM_001920	DCN	NM_001920 || DCN || Homo sapiens decorin (DCN), transcript variant A1, mRNA [NM_001920]	0.63878	0
NM_001199290	PHOSPHO2-KLHL23	NM_001199290 || PHOSPHO2-KLHL23 || Homo sapiens PHOSPHO2-KLHL23 readthrough (PHOSPHO2-KLHL23), mRNA [NM_001199290]	0.638684	1.29369
NM_001565	CXCL10	NM_001565 || CXCL10 || Homo sapiens chemokine (C-X-C motif) ligand 10 (CXCL10), mRNA [NM_001565]	0.638613	0.141773
NM_000432	MYL2	NM_000432 || MYL2 || Homo sapiens myosin, light chain 2, regulatory, cardiac, slow (MYL2), mRNA [NM_000432]	0.638398	1.75458
NM_006291	TNFAIP2	NM_006291 || TNFAIP2 || Homo sapiens tumor necrosis factor, alpha-induced protein 2 (TNFAIP2), mRNA [NM_006291]	0.638129	0.256888
NM_001034852	SMOC1	NM_001034852 || SMOC1 || Homo sapiens SPARC related modular calcium binding 1 (SMOC1), transcript variant 1, mRNA [NM_001034852]	0.637844	0.135387
NM_004089	TSC22D3	NM_004089 || TSC22D3 || Homo sapiens TSC22 domain family, member 3 (TSC22D3), transcript variant 2, mRNA [NM_004089]	0.637776	0
lnc-TMED3-1:1	lnc-TMED3-1	lnc-TMED3-1:1 || lnc-TMED3-1 || Homo sapiens mRNA full length insert cDNA clone EUROIMAGE 687685. [AL109713]	0.637662	3.8006
NM_015150	RFTN1	NM_015150 || RFTN1 || Homo sapiens raftlin, lipid raft linker 1 (RFTN1), mRNA [NM_015150]	0.637509	0
NM_001290268	FAM65C	NM_001290268 || FAM65C || Homo sapiens family with sequence similarity 65, member C (FAM65C), transcript variant 2, mRNA [NM_001290268]	0.63731	0.247577
ENST00000368656	FAM229B	ENST00000368656 || FAM229B || family with sequence similarity 229, member B [Source:HGNC Symbol;Acc:HGNC:33858] [ENST00000368656]	0.637267	0
ENST00000449219		ENST00000449219 || || septin 7 pseudogene 9 [Source:EntrezGene;Acc:285961] [ENST00000449219]	0.637074	1.1905
NR_110132	LINC01152	NR_110132 || LINC01152 || Homo sapiens long intergenic non-protein coding RNA 1152 (LINC01152), transcript variant 2, long non-coding RNA [NR_110132]	0.637072	2.24564
NM_018837	SULF2	NM_018837 || SULF2 || Homo sapiens sulfatase 2 (SULF2), transcript variant 1, mRNA [NM_018837]	0.636955	0
NM_006883	SHOX	NM_006883 || SHOX || Homo sapiens short stature homeobox (SHOX), transcript variant 2, mRNA [NM_006883]	0.636295	2.20356
NM_019084	CCNJ	NM_019084 || CCNJ || Homo sapiens cyclin J (CCNJ), transcript variant 2, mRNA [NM_019084]	0.636106	0.484148
NM_021110	COL14A1	NM_021110 || COL14A1 || Homo sapiens collagen, type XIV, alpha 1 (COL14A1), mRNA [NM_021110]	0.636002	0.523125
NM_001145033	C11orf96	NM_001145033 || C11orf96 || Homo sapiens chromosome 11 open reading frame 96 (C11orf96), mRNA [NM_001145033]	0.635933	0.63476
NM_003038	SLC1A4	NM_003038 || SLC1A4 || Homo sapiens solute carrier family 1 (glutamate/neutral amino acid transporter), member 4 (SLC1A4), transcript variant 1, mRNA [NM_003038]	0.63591	0.70517
NM_173489	MROH2B	NM_173489 || MROH2B || Homo sapiens maestro heat-like repeat family member 2B (MROH2B), mRNA [NM_173489]	0.635838	0.0890281
NM_003034	ST8SIA1	NM_003034 || ST8SIA1 || Homo sapiens ST8 alpha-N-acetyl-neuraminide alpha-2,8-sialyltransferase 1 (ST8SIA1), mRNA [NM_003034]	0.635833	1.34826
ENST00000433260		ENST00000433260 || || high mobility group box 3 pseudogene 24 [Source:HGNC Symbol;Acc:HGNC:39316] [ENST00000433260]	0.635799	1.71387
NM_018284	GBP3	NM_018284 || GBP3 || Homo sapiens guanylate binding protein 3 (GBP3), mRNA [NM_018284]	0.635149	0
NM_012281	KCND2	NM_012281 || KCND2 || Homo sapiens potassium channel, voltage gated Shal related subfamily D, member 2 (KCND2), mRNA [NM_012281]	0.634442	0.937511
NM_019119	PCDHB9	NM_019119 || PCDHB9 || Homo sapiens protocadherin beta 9 (PCDHB9), mRNA [NM_019119]	0.634394	0.839754
XR_425930	LOC102724551	XR_425930 || LOC102724551 || PREDICTED: Homo sapiens uncharacterized LOC102724551 (LOC102724551), ncRNA [XR_425930]	0.634291	9.91133
NM_144684	ZNF480	NM_144684 || ZNF480 || Homo sapiens zinc finger protein 480 (ZNF480), transcript variant 1, mRNA [NM_144684]	0.634284	0.484148
NR_003026	SNORA1	NR_003026 || SNORA1 || Homo sapiens small nucleolar RNA, H/ACA box 1 (SNORA1), small nucleolar RNA [NR_003026]	0.633769	8.4009
NR_034077	THAP9-AS1	NR_034077 || THAP9-AS1 || Homo sapiens THAP9 antisense RNA 1 (THAP9-AS1), transcript variant 3, long non-coding RNA [NR_034077]	0.633459	3.8006
NM_001014809	CRMP1	NM_001014809 || CRMP1 || Homo sapiens collapsin response mediator protein 1 (CRMP1), transcript variant 1, mRNA [NM_001014809]	0.633218	2.0077
NR_036444	FENDRR	NR_036444 || FENDRR || Homo sapiens FOXF1 adjacent non-coding developmental regulatory RNA (FENDRR), transcript variant 2, long non-coding RNA [NR_036444]	0.633203	0.323878
NM_001165252	KRTAP2-3	NM_001165252 || KRTAP2-3 || Homo sapiens keratin associated protein 2-3 (KRTAP2-3), mRNA [NM_001165252]	0.632955	4.1832
NM_020130	C8orf4	NM_020130 || C8orf4 || Homo sapiens chromosome 8 open reading frame 4 (C8orf4), mRNA [NM_020130]	0.63294	0.70517
NR_105059	MIR143HG	NR_105059 || MIR143HG || Homo sapiens MIR143 host gene (non-protein coding) (MIR143HG), transcript variant 1, long non-coding RNA [NR_105059]	0.632744	0.491109
NM_020529	NFKBIA	NM_020529 || NFKBIA || Homo sapiens nuclear factor of kappa light polypeptide gene enhancer in B-cells inhibitor, alpha (NFKBIA), mRNA [NM_020529]	0.632733	0.135387
NM_001002029	C4B	NM_001002029 || C4B || Homo sapiens complement component 4B (Chido blood group) (C4B), mRNA [NM_001002029]	0.632683	0.167349
lnc-LRTM2-2:1	lnc-LRTM2-2	lnc-LRTM2-2:1 || lnc-LRTM2-2 || 603077963F1 NIH_MGC_119 Homo sapiens cDNA clone IMAGE:5169974 5', mRNA sequence [BI827305]	0.632645	0.150883
lnc-ARHGAP17-3:1	lnc-ARHGAP17-3	lnc-ARHGAP17-3:1 || lnc-ARHGAP17-3 || LNCipedia lincRNA (lnc-ARHGAP17-3), lincRNA [lnc-ARHGAP17-3:1]	0.632224	2.20356
ENST00000409040	EML4	ENST00000409040 || EML4 || echinoderm microtubule associated protein like 4 [Source:HGNC Symbol;Acc:HGNC:1316] [ENST00000409040]	0.632111	0
NM_001259	CDK6	NM_001259 || CDK6 || Homo sapiens cyclin-dependent kinase 6 (CDK6), transcript variant 1, mRNA [NM_001259]	0.632078	0.0879856
NM_001710	CFB	NM_001710 || CFB || Homo sapiens complement factor B (CFB), mRNA [NM_001710]	0.631682	0.339999
NM_016603	FAM13B	NM_016603 || FAM13B || Homo sapiens family with sequence similarity 13, member B (FAM13B), transcript variant 1, mRNA [NM_016603]	0.631607	0.288555
NM_000366	TPM1	NM_000366 || TPM1 || Homo sapiens tropomyosin 1 (alpha) (TPM1), transcript variant Tpm1.5, mRNA [NM_000366]	0.631282	0
NM_001101663	NBPF11	NM_001101663 || NBPF11 || Homo sapiens neuroblastoma breakpoint family, member 11 (NBPF11), transcript variant 1, mRNA [NM_001101663]	0.631066	1.12907
lnc-BDKRB1-1:1	lnc-BDKRB1-1	lnc-BDKRB1-1:1 || lnc-BDKRB1-1 || LNCipedia lincRNA (lnc-BDKRB1-1), lincRNA [lnc-BDKRB1-1:1]	0.630853	0.491109
NM_018590	CSGALNACT2	NM_018590 || CSGALNACT2 || Homo sapiens chondroitin sulfate N-acetylgalactosaminyltransferase 2 (CSGALNACT2), mRNA [NM_018590]	0.630061	0
ENST00000374461	SVEP1	ENST00000374461 || SVEP1 || sushi, von Willebrand factor type A, EGF and pentraxin domain containing 1 [Source:HGNC Symbol;Acc:HGNC:15985] [ENST00000374461]	0.629808	5.796
ENST00000430247		ENST00000430247 || || PREDICTED: Homo sapiens uncharacterized LOC101928011 (LOC101928011), ncRNA [XR_244302]	0.629735	0
NM_024812	BAALC	NM_024812 || BAALC || Homo sapiens brain and acute leukemia, cytoplasmic (BAALC), transcript variant 1, mRNA [NM_024812]	0.629684	0.139665
NR_026813	LINC00597	NR_026813 || LINC00597 || Homo sapiens long intergenic non-protein coding RNA 597 (LINC00597), long non-coding RNA [NR_026813]	0.62966	3.8006
lnc-HDAC9-3:1	lnc-HDAC9-3	lnc-HDAC9-3:1 || lnc-HDAC9-3 || LNCipedia lincRNA (lnc-HDAC9-3), lincRNA [lnc-HDAC9-3:1]	0.629493	0.0879856
NM_001195296	MIPOL1	NM_001195296 || MIPOL1 || Homo sapiens mirror-image polydactyly 1 (MIPOL1), transcript variant 1, mRNA [NM_001195296]	0.629454	1.00009
NM_002614	PDZK1	NM_002614 || PDZK1 || Homo sapiens PDZ domain containing 1 (PDZK1), transcript variant 1, mRNA [NM_002614]	0.629334	1.45997
NR_004403	SNORD97	NR_004403 || SNORD97 || Homo sapiens small nucleolar RNA, C/D box 97 (SNORD97), small nucleolar RNA [NR_004403]	0.629227	2.93491
NM_001037501	NBPF8	NM_001037501 || NBPF8 || Homo sapiens neuroblastoma breakpoint family, member 8 (NBPF8), transcript variant 1, mRNA [NM_001037501]	0.629185	1.61939
THC2523717		THC2523717 || || HS268H5 {Homo sapiens} (exp=0; wgp=1; cg=0), partial (84%) [THC2523717]	0.629175	2.20356
NM_024420	PLA2G4A	NM_024420 || PLA2G4A || Homo sapiens phospholipase A2, group IVA (cytosolic, calcium-dependent) (PLA2G4A), mRNA [NM_024420]	0.628961	0.252147
NR_125424	LOC101927822	NR_125424 || LOC101927822 || Homo sapiens uncharacterized LOC101927822 (LOC101927822), long non-coding RNA [NR_125424]	0.628647	3.8006
NM_024837	ATP8B4	NM_024837 || ATP8B4 || Homo sapiens ATPase, class I, type 8B, member 4 (ATP8B4), transcript variant 1, mRNA [NM_024837]	0.628567	2.58313
NM_182577	ODF3L2	NM_182577 || ODF3L2 || Homo sapiens outer dense fiber of sperm tails 3-like 2 (ODF3L2), mRNA [NM_182577]	0.628542	0.513377
lnc-ANKRD30A-3:1	lnc-ANKRD30A-3	lnc-ANKRD30A-3:1 || lnc-ANKRD30A-3 || LNCipedia lincRNA (lnc-ANKRD30A-3), lincRNA [lnc-ANKRD30A-3:1]	0.62848	0.883581
NR_003077	SNORD99	NR_003077 || SNORD99 || Homo sapiens small nucleolar RNA, C/D box 99 (SNORD99), small nucleolar RNA [NR_003077]	0.628307	3.06663
ENST00000596416		ENST00000596416 || || ens	0.628232	1.29369
ENST00000534276	CHRDL2	ENST00000534276 || CHRDL2 || chordin-like 2 [Source:HGNC Symbol;Acc:HGNC:24168] [ENST00000534276]	0.628199	0.900524
AK092120	LOC283674	AK092120 || LOC283674 || Homo sapiens cDNA FLJ34801 fis, clone NT2NE2006382. [AK092120]	0.627689	1.84524
NM_003326	TNFSF4	NM_003326 || TNFSF4 || Homo sapiens tumor necrosis factor (ligand) superfamily, member 4 (TNFSF4), transcript variant 1, mRNA [NM_003326]	0.627511	0.331987
NM_020893	CCDC180	NM_020893 || CCDC180 || Homo sapiens coiled-coil domain containing 180 (CCDC180), mRNA [NM_020893]	0.62726	3.41056
NM_001007232	CARD17	NM_001007232 || CARD17 || Homo sapiens caspase recruitment domain family, member 17 (CARD17), mRNA [NM_001007232]	0.62705	0.139665
NM_138455	CTHRC1	NM_138455 || CTHRC1 || Homo sapiens collagen triple helix repeat containing 1 (CTHRC1), transcript variant 1, mRNA [NM_138455]	0.626905	0
NM_006509	RELB	NM_006509 || RELB || Homo sapiens v-rel avian reticuloendotheliosis viral oncogene homolog B (RELB), mRNA [NM_006509]	0.626728	0
NM_014636	RALGPS1	NM_014636 || RALGPS1 || Homo sapiens Ral GEF with PH domain and SH3 binding motif 1 (RALGPS1), transcript variant 1, mRNA [NM_014636]	0.62654	0.150883
lnc-SFTPD-2:9	lnc-SFTPD-2	lnc-SFTPD-2:9 || lnc-SFTPD-2 || LNCipedia lincRNA (lnc-SFTPD-2), lincRNA [lnc-SFTPD-2:9]	0.626495	2.40025
NR_002433	SNORD12C	NR_002433 || SNORD12C || Homo sapiens small nucleolar RNA, C/D box 12C (SNORD12C), small nucleolar RNA [NR_002433]	0.62609	2.66656
NM_147193	GLIS1	NM_147193 || GLIS1 || Homo sapiens GLIS family zinc finger 1 (GLIS1), mRNA [NM_147193]	0.626085	0
TCONS_l2_00022667	XLOC_l2_011873	TCONS_l2_00022667 || XLOC_l2_011873 || BROAD Institute lincRNA (XLOC_l2_011873), lincRNA [TCONS_l2_00022667]	0.625759	0.161244
NM_016135	ETV7	NM_016135 || ETV7 || Homo sapiens ets variant 7 (ETV7), transcript variant 1, mRNA [NM_016135]	0.625443	0.256888
TCONS_l2_00016966	XLOC_l2_008976	TCONS_l2_00016966 || XLOC_l2_008976 || BROAD Institute lincRNA (XLOC_l2_008976), lincRNA [TCONS_l2_00016966]	0.625439	0
ENST00000556720	SNHG23	ENST00000556720 || SNHG23 || small nucleolar RNA host gene 23 (non-protein coding) [Source:HGNC Symbol;Acc:HGNC:50622] [ENST00000556720]	0.625403	0
NM_012425	RSU1	NM_012425 || RSU1 || Homo sapiens Ras suppressor protein 1 (RSU1), transcript variant 1, mRNA [NM_012425]	0.62539	0.155892
XM_006710179		XM_006710179 || || PREDICTED: Homo sapiens glutenin, high molecular weight subunit DX5-like (LOC100996433), mRNA [XM_006710179]	0.625268	0.256888
NM_006486	FBLN1	NM_006486 || FBLN1 || Homo sapiens fibulin 1 (FBLN1), transcript variant D, mRNA [NM_006486]	0.625251	0
ENST00000570408		ENST00000570408 || || UI-E-CQ1-aex-j-05-0-UI.r1 UI-E-CQ1 Homo sapiens cDNA clone UI-E-CQ1-aex-j-05-0-UI 5', mRNA sequence [BM711518]	0.625141	1.75458
NM_198129	LAMA3	NM_198129 || LAMA3 || Homo sapiens laminin, alpha 3 (LAMA3), transcript variant 1, mRNA [NM_198129]	0.62511	1.12907
NM_006226	PLCL1	NM_006226 || PLCL1 || Homo sapiens phospholipase C-like 1 (PLCL1), mRNA [NM_006226]	0.625009	1.84524
XR_425055	LOC102723465	XR_425055 || LOC102723465 || PREDICTED: Homo sapiens uncharacterized LOC102723465 (LOC102723465), ncRNA [XR_425055]	0.62482	1.43927
lnc-ARSJ-1:3	lnc-ARSJ-1	lnc-ARSJ-1:3 || lnc-ARSJ-1 || LNCipedia lincRNA (lnc-ARSJ-1), lincRNA [lnc-ARSJ-1:3]	0.624718	5.53417
NM_032867	MICALCL	NM_032867 || MICALCL || Homo sapiens MICAL C-terminal like (MICALCL), mRNA [NM_032867]	0.624666	1.29369
ENST00000544271	BAD	ENST00000544271 || BAD || BCL2-associated agonist of cell death [Source:HGNC Symbol;Acc:HGNC:936] [ENST00000544271]	0.624585	7.02514
NM_001013628	DCAF12L2	NM_001013628 || DCAF12L2 || Homo sapiens DDB1 and CUL4 associated factor 12-like 2 (DCAF12L2), mRNA [NM_001013628]	0.624264	1.75458
lnc-VIM-1:2	lnc-VIM-1	lnc-VIM-1:2 || lnc-VIM-1 || Homo sapiens cDNA FLJ46097 fis, clone TESTI2021112. [AK127982]	0.624213	1.09198
lnc-MRGPRF-1:1	lnc-MRGPRF-1	lnc-MRGPRF-1:1 || lnc-MRGPRF-1 || Homo sapiens cDNA FLJ26906 fis, clone RCT01504. [AK130416]	0.624166	0.546471
NM_199235	COLEC11	NM_199235 || COLEC11 || Homo sapiens collectin sub-family member 11 (COLEC11), transcript variant 2, mRNA [NM_199235]	0.623669	0
NM_014800	ELMO1	NM_014800 || ELMO1 || Homo sapiens engulfment and cell motility 1 (ELMO1), transcript variant 1, mRNA [NM_014800]	0.62366	7.30408
ENST00000443577		ENST00000443577 || || ribosomal protein L32 pseudogene 28 [Source:HGNC Symbol;Acc:HGNC:36328] [ENST00000443577]	0.623343	1.45997
ENST00000606966		ENST00000606966 || || PREDICTED: Homo sapiens uncharacterized LOC101928450 (LOC101928450), transcript variant X1, ncRNA [XR_244051]	0.623322	0.25428
ENST00000593545	CYP2S1	ENST00000593545 || CYP2S1 || cytochrome P450, family 2, subfamily S, polypeptide 1 [Source:HGNC Symbol;Acc:HGNC:15654] [ENST00000593545]	0.623178	0.42392
ENST00000560760		ENST00000560760 || || Unknown	0.623165	0
NM_003206	TCF21	NM_003206 || TCF21 || Homo sapiens transcription factor 21 (TCF21), transcript variant 2, mRNA [NM_003206]	0.623075	0.937511
NM_001303429	PIK3R3	NM_001303429 || PIK3R3 || Homo sapiens phosphoinositide-3-kinase, regulatory subunit 3 (gamma) (PIK3R3), transcript variant 5, mRNA [NM_001303429]	0.622975	2.08097
ENST00000438790		ENST00000438790 || || Unknown	0.622546	2.93491
lnc-SEMA6C-1:1	lnc-SEMA6C-1	lnc-SEMA6C-1:1 || lnc-SEMA6C-1 || LNCipedia lincRNA (lnc-SEMA6C-1), lincRNA [lnc-SEMA6C-1:1]	0.622463	6.42066
TCONS_l2_00005011	XLOC_l2_002651	TCONS_l2_00005011 || XLOC_l2_002651 || BROAD Institute lincRNA (XLOC_l2_002651), lincRNA [TCONS_l2_00005011]	0.622024	0.238539
lnc-SYNPO2-2:1	lnc-SYNPO2-2	lnc-SYNPO2-2:1 || lnc-SYNPO2-2 || LNCipedia lincRNA (lnc-SYNPO2-2), lincRNA [lnc-SYNPO2-2:1]	0.621563	2.29913
NM_198267	ING3	NM_198267 || ING3 || Homo sapiens inhibitor of growth family, member 3 (ING3), transcript variant 3, mRNA [NM_198267]	0.621176	0.418606
NM_003305	TRPC3	NM_003305 || TRPC3 || Homo sapiens transient receptor potential cation channel, subfamily C, member 3 (TRPC3), transcript variant 2, mRNA [NM_003305]	0.621116	0.411161
NR_001292	SNORD108	NR_001292 || SNORD108 || Homo sapiens small nucleolar RNA, C/D box 108 (SNORD108), small nucleolar RNA [NR_001292]	0.62079	0.323878
NM_017820	EXD3	NM_017820 || EXD3 || Homo sapiens exonuclease 3'-5' domain containing 3 (EXD3), transcript variant 1, mRNA [NM_017820]	0.620725	7.81615
NM_001191056	PDE1C	NM_001191056 || PDE1C || Homo sapiens phosphodiesterase 1C, calmodulin-dependent 70kDa (PDE1C), transcript variant 1, mRNA [NM_001191056]	0.620641	1.97949
NM_004822	NTN1	NM_004822 || NTN1 || Homo sapiens netrin 1 (NTN1), mRNA [NM_004822]	0.620542	0.839754
ENST00000597683		ENST00000597683 || || Unknown	0.620302	0.753658
NM_033260	FOXQ1	NM_033260 || FOXQ1 || Homo sapiens forkhead box Q1 (FOXQ1), mRNA [NM_033260]	0.620243	0
lnc-DHX37-9:8	lnc-DHX37-9	lnc-DHX37-9:8 || lnc-DHX37-9 || LNCipedia lincRNA (lnc-DHX37-9), lincRNA [lnc-DHX37-9:8]	0.620219	0.159532
ENST00000604870	PGM5	ENST00000604870 || PGM5 || phosphoglucomutase 5 [Source:HGNC Symbol;Acc:HGNC:8908] [ENST00000604870]	0.620044	0
AK127438	ZC3H18-AS1	AK127438 || ZC3H18-AS1 || Homo sapiens cDNA FLJ45530 fis, clone BRTHA2028297. [AK127438]	0.619835	0.732131
NM_030583	MATN2	NM_030583 || MATN2 || Homo sapiens matrilin 2 (MATN2), transcript variant 2, mRNA [NM_030583]	0.619556	0.839754
NR_026874	LOC100130417	NR_026874 || LOC100130417 || Homo sapiens uncharacterized LOC100130417 (LOC100130417), transcript variant 1, long non-coding RNA [NR_026874]	0.619343	1.43927
TCONS_l2_00018461	XLOC_l2_009639	TCONS_l2_00018461 || XLOC_l2_009639 || BROAD Institute lincRNA (XLOC_l2_009639), lincRNA [TCONS_l2_00018461]	0.619197	0.453256
XM_006709948	MS4A18	XM_006709948 || MS4A18 || PREDICTED: Homo sapiens membrane-spanning 4-domains, subfamily A, member 18 (MS4A18), mRNA [XM_006709948]	0.619141	1.71387
NM_138967	SCAMP5	NM_138967 || SCAMP5 || Homo sapiens secretory carrier membrane protein 5 (SCAMP5), transcript variant 3, mRNA [NM_138967]	0.618911	0.617249
THC2548955		THC2548955 || || Q14867_HUMAN (Q14867) K222 protein (Fragment), complete [THC2548955]	0.618878	0
NM_020809	ARHGAP20	NM_020809 || ARHGAP20 || Homo sapiens Rho GTPase activating protein 20 (ARHGAP20), transcript variant 1, mRNA [NM_020809]	0.618587	0.141773
NR_003221	SNORD114-28	NR_003221 || SNORD114-28 || Homo sapiens small nucleolar RNA, C/D box 114-28 (SNORD114-28), small nucleolar RNA [NR_003221]	0.618201	0
NM_020120	UGGT1	NM_020120 || UGGT1 || Homo sapiens UDP-glucose glycoprotein glucosyltransferase 1 (UGGT1), transcript variant 1, mRNA [NM_020120]	0.617947	0.537993
NM_001039762	FAM196A	NM_001039762 || FAM196A || Homo sapiens family with sequence similarity 196, member A (FAM196A), mRNA [NM_001039762]	0.617894	0
NM_000610	CD44	NM_000610 || CD44 || Homo sapiens CD44 molecule (Indian blood group) (CD44), transcript variant 1, mRNA [NM_000610]	0.61788	0.159532
NM_147198	WFDC9	NM_147198 || WFDC9 || Homo sapiens WAP four-disulfide core domain 9 (WFDC9), mRNA [NM_147198]	0.617849	3.8006
NM_001129742	CALHM3	NM_001129742 || CALHM3 || Homo sapiens calcium homeostasis modulator 3 (CALHM3), mRNA [NM_001129742]	0.617841	5.3737
NM_001142483	NREP	NM_001142483 || NREP || Homo sapiens neuronal regeneration related protein (NREP), transcript variant 11, mRNA [NM_001142483]	0.617664	0.256888
NM_022783	DEPTOR	NM_022783 || DEPTOR || Homo sapiens DEP domain containing MTOR-interacting protein (DEPTOR), transcript variant 1, mRNA [NM_022783]	0.616905	2.40025
NR_003195	SNORD114-3	NR_003195 || SNORD114-3 || Homo sapiens small nucleolar RNA, C/D box 114-3 (SNORD114-3), small nucleolar RNA [NR_003195]	0.616686	0
NM_000090	COL3A1	NM_000090 || COL3A1 || Homo sapiens collagen, type III, alpha 1 (COL3A1), mRNA [NM_000090]	0.61651	9.23036
NR_109865	LOC100506674	NR_109865 || LOC100506674 || Homo sapiens uncharacterized LOC100506674 (LOC100506674), transcript variant 4, long non-coding RNA [NR_109865]	0.616486	1.41773
NM_033343	LHX4	NM_033343 || LHX4 || Homo sapiens LIM homeobox 4 (LHX4), mRNA [NM_033343]	0.616371	0.604665
NM_016239	MYO15A	NM_016239 || MYO15A || Homo sapiens myosin XVA (MYO15A), mRNA [NM_016239]	0.615323	3.06663
XR_426514	LOC102723780	XR_426514 || LOC102723780 || PREDICTED: Homo sapiens uncharacterized LOC102723780 (LOC102723780), ncRNA [XR_426514]	0.615072	3.50317
ENST00000561876		ENST00000561876 || || Unknown	0.614876	0.753658
NM_004619	TRAF5	NM_004619 || TRAF5 || Homo sapiens TNF receptor-associated factor 5 (TRAF5), transcript variant 1, mRNA [NM_004619]	0.614541	0.405613
NR_125737	TTTY14	NR_125737 || TTTY14 || Homo sapiens testis-specific transcript, Y-linked 14 (non-protein coding) (TTTY14), transcript variant 6, long non-coding RNA [NR_125737]	0.614381	3.89407
NM_214462	DACT2	NM_214462 || DACT2 || Homo sapiens dishevelled-binding antagonist of beta-catenin 2 (DACT2), transcript variant 1, mRNA [NM_214462]	0.614157	0.0875754
NM_178140	PDZD2	NM_178140 || PDZD2 || Homo sapiens PDZ domain containing 2 (PDZD2), mRNA [NM_178140]	0.614154	1.84524
NM_001206	KLF9	NM_001206 || KLF9 || Homo sapiens Kruppel-like factor 9 (KLF9), mRNA [NM_001206]	0.614151	0
NM_022114	PRDM16	NM_022114 || PRDM16 || Homo sapiens PR domain containing 16 (PRDM16), transcript variant 1, mRNA [NM_022114]	0.613951	0
NM_001040709	SYPL2	NM_001040709 || SYPL2 || Homo sapiens synaptophysin-like 2 (SYPL2), mRNA [NM_001040709]	0.613323	0.900524
NM_006507	REG1B	NM_006507 || REG1B || Homo sapiens regenerating islet-derived 1 beta (REG1B), mRNA [NM_006507]	0.613304	1.1905
NR_120328	LOC102724558	NR_120328 || LOC102724558 || Homo sapiens uncharacterized LOC102724558 (LOC102724558), long non-coding RNA [NR_120328]	0.612921	6.24009
NM_030657	LIM2	NM_030657 || LIM2 || Homo sapiens lens intrinsic membrane protein 2, 19kDa (LIM2), transcript variant 1, mRNA [NM_030657]	0.61289	2.93491
NR_026838	DSCR8	NR_026838 || DSCR8 || Homo sapiens Down syndrome critical region 8 (DSCR8), transcript variant 4, long non-coding RNA [NR_026838]	0.612817	6.80203
NM_001039492	FHL2	NM_001039492 || FHL2 || Homo sapiens four and a half LIM domains 2 (FHL2), transcript variant 5, mRNA [NM_001039492]	0.612641	0
ENST00000430123		ENST00000430123 || || Unknown	0.612536	3.94553
NM_145802	SEPT6	NM_145802 || SEPT6 || Homo sapiens septin 6 (SEPT6), transcript variant V, mRNA [NM_145802]	0.612528	0
ENST00000518014	MIR143HG	ENST00000518014 || MIR143HG || MIR143 host gene (non-protein coding) [Source:HGNC Symbol;Acc:HGNC:42872] [ENST00000518014]	0.612423	2.03028
NM_001104548	MIR205HG	NM_001104548 || MIR205HG || Homo sapiens MIR205 host gene (non-protein coding) (MIR205HG), mRNA [NM_001104548]	0.6122	3.06663
NM_153690	FAM43A	NM_153690 || FAM43A || Homo sapiens family with sequence similarity 43, member A (FAM43A), mRNA [NM_153690]	0.61175	0.155892
ENST00000502100		ENST00000502100 || || Unknown	0.611571	0
lnc-ZNF730-1:1	lnc-ZNF730-1	lnc-ZNF730-1:1 || lnc-ZNF730-1 || LNCipedia lincRNA (lnc-ZNF730-1), lincRNA [lnc-ZNF730-1:1]	0.611365	4.55297
NM_003708	RDH16	NM_003708 || RDH16 || Homo sapiens retinol dehydrogenase 16 (all-trans) (RDH16), mRNA [NM_003708]	0.611197	2.58313
lnc-RP11-511B23.3.1-1:2	lnc-RP11-511B23.3.1-1	lnc-RP11-511B23.3.1-1:2 || lnc-RP11-511B23.3.1-1 || LNCipedia lincRNA (lnc-RP11-511B23.3.1-1), lincRNA [lnc-RP11-511B23.3.1-1:2]	0.611177	0.161244
NR_120598	GACAT2	NR_120598 || GACAT2 || Homo sapiens gastric cancer associated transcript 2 (non-protein coding) (GACAT2), long non-coding RNA [NR_120598]	0.610851	0.247577
NR_122104	LOC440446	NR_122104 || LOC440446 || Homo sapiens uncharacterized LOC440446 (LOC440446), long non-coding RNA [NR_122104]	0.609762	0
ENST00000467600	RABL2A	ENST00000467600 || RABL2A || RAB, member of RAS oncogene family-like 2A [Source:HGNC Symbol;Acc:HGNC:9799] [ENST00000467600]	0.609752	9.23036
NM_001321	CSRP2	NM_001321 || CSRP2 || Homo sapiens cysteine and glycine-rich protein 2 (CSRP2), transcript variant 1, mRNA [NM_001321]	0.609672	0
NR_003219	SNORD114-26	NR_003219 || SNORD114-26 || Homo sapiens small nucleolar RNA, C/D box 114-26 (SNORD114-26), small nucleolar RNA [NR_003219]	0.609492	0
NM_003253	TIAM1	NM_003253 || TIAM1 || Homo sapiens T-cell lymphoma invasion and metastasis 1 (TIAM1), mRNA [NM_003253]	0.609469	0
NM_001171	ABCC6	NM_001171 || ABCC6 || Homo sapiens ATP-binding cassette, sub-family C (CFTR/MRP), member 6 (ABCC6), transcript variant 1, mRNA [NM_001171]	0.60919	0.70517
NM_033387	FAM78A	NM_033387 || FAM78A || Homo sapiens family with sequence similarity 78, member A (FAM78A), mRNA [NM_033387]	0.60862	0.411161
lnc-CMPK2-2:2	lnc-CMPK2-2	lnc-CMPK2-2:2 || lnc-CMPK2-2 || Homo sapiens cDNA FLJ32573 fis, clone SPLEN2000210. [AK057135]	0.608235	1.84524
NM_000221	KHK	NM_000221 || KHK || Homo sapiens ketohexokinase (fructokinase) (KHK), transcript variant a, mRNA [NM_000221]	0.608194	1.71387
NM_015296	DOCK9	NM_015296 || DOCK9 || Homo sapiens dedicator of cytokinesis 9 (DOCK9), transcript variant 1, mRNA [NM_015296]	0.608057	0.418606
ENST00000454968	LINC00963	ENST00000454968 || LINC00963 || long intergenic non-protein coding RNA 963 [Source:HGNC Symbol;Acc:HGNC:48716] [ENST00000454968]	0.608045	3.28079
NM_023930	KCTD14	NM_023930 || KCTD14 || Homo sapiens potassium channel tetramerization domain containing 14 (KCTD14), transcript variant 1, mRNA [NM_023930]	0.606793	6.42066
lnc-ARSJ-1:6	lnc-ARSJ-1	lnc-ARSJ-1:6 || lnc-ARSJ-1 || LNCipedia lincRNA (lnc-ARSJ-1), lincRNA [lnc-ARSJ-1:6]	0.60678	1.84524
NM_001955	EDN1	NM_001955 || EDN1 || Homo sapiens endothelin 1 (EDN1), transcript variant 1, mRNA [NM_001955]	0.606437	0.339999
NM_001290226	MAST4	NM_001290226 || MAST4 || Homo sapiens microtubule associated serine/threonine kinase family member 4 (MAST4), transcript variant 4, mRNA [NM_001290226]	0.60622	2.0077
NM_015238	WWC1	NM_015238 || WWC1 || Homo sapiens WW and C2 domain containing 1 (WWC1), transcript variant 3, mRNA [NM_015238]	0.606146	0.170772
ENST00000466271	BEND7	ENST00000466271 || BEND7 || BEN domain containing 7 [Source:HGNC Symbol;Acc:HGNC:23514] [ENST00000466271]	0.605936	1.04276
NM_001195620	C16orf93	NM_001195620 || C16orf93 || Homo sapiens chromosome 16 open reading frame 93 (C16orf93), transcript variant 2, mRNA [NM_001195620]	0.605817	1.15956
NR_003009	SCARNA8	NR_003009 || SCARNA8 || Homo sapiens small Cajal body-specific RNA 8 (SCARNA8), guide RNA [NR_003009]	0.605527	9.23036
NM_020997	LEFTY1	NM_020997 || LEFTY1 || Homo sapiens left-right determination factor 1 (LEFTY1), mRNA [NM_020997]	0.605506	1.45997
lnc-BTBD17-2:1	lnc-BTBD17-2	lnc-BTBD17-2:1 || lnc-BTBD17-2 || H.sapiens mRNA for ets-like protein (clone 3A). [Z49982]	0.60515	0.617249
NM_152324	TEX29	NM_152324 || TEX29 || Homo sapiens testis expressed 29 (TEX29), transcript variant 2, mRNA [NM_152324]	0.605125	1.04276
BC061902		BC061902 || || Homo sapiens cDNA clone IMAGE:4186600. [BC061902]	0.6049	0
NM_201563	FCGR2C	NM_201563 || FCGR2C || Homo sapiens Fc fragment of IgG, low affinity IIc, receptor for (CD32) (gene/pseudogene) (FCGR2C), transcript variant 1, mRNA [NM_201563]	0.604882	2.80882
NM_001112	ADARB1	NM_001112 || ADARB1 || Homo sapiens adenosine deaminase, RNA-specific, B1 (ADARB1), transcript variant 1, mRNA [NM_001112]	0.604857	0
NM_173649	C2orf61	NM_173649 || C2orf61 || Homo sapiens chromosome 2 open reading frame 61 (C2orf61), transcript variant 2, mRNA [NM_173649]	0.604661	0.607365
NM_006465	ARID3B	NM_006465 || ARID3B || Homo sapiens AT rich interactive domain 3B (BRIGHT-like) (ARID3B), mRNA [NM_006465]	0.60461	0
NM_003541	HIST1H4K	NM_003541 || HIST1H4K || Homo sapiens histone cluster 1, H4k (HIST1H4K), mRNA [NM_003541]	0.604499	0.16442
NR_110589	LOC101927318	NR_110589 || LOC101927318 || Homo sapiens uncharacterized LOC101927318 (LOC101927318), transcript variant 2, long non-coding RNA [NR_110589]	0.604389	1.97949
NM_006089	SCML2	NM_006089 || SCML2 || Homo sapiens sex comb on midleg-like 2 (Drosophila) (SCML2), transcript variant 1, mRNA [NM_006089]	0.604322	3.94553
NM_017911	FAM118A	NM_017911 || FAM118A || Homo sapiens family with sequence similarity 118, member A (FAM118A), transcript variant 2, mRNA [NM_017911]	0.604234	0.418606
NM_004755	RPS6KA5	NM_004755 || RPS6KA5 || Homo sapiens ribosomal protein S6 kinase, 90kDa, polypeptide 5 (RPS6KA5), transcript variant 1, mRNA [NM_004755]	0.603972	0.411161
ENST00000432334		ENST00000432334 || || HSJ1175I6 Ras and Rab interactor 2 {Homo sapiens} (exp=0; wgp=1; cg=0), partial (3%) [THC2561464]	0.603889	3.41056
NM_178012	TUBB2B	NM_178012 || TUBB2B || Homo sapiens tubulin, beta 2B class IIb (TUBB2B), mRNA [NM_178012]	0.603595	0
NM_001114173	CTSC	NM_001114173 || CTSC || Homo sapiens cathepsin C (CTSC), transcript variant 3, mRNA [NM_001114173]	0.603583	0
NM_001001715	FARP1	NM_001001715 || FARP1 || Homo sapiens FERM, RhoGEF (ARHGEF) and pleckstrin domain protein 1 (chondrocyte-derived) (FARP1), transcript variant 2, mRNA [NM_001001715]	0.603309	4.34791
TCONS_l2_00019209	XLOC_l2_010139	TCONS_l2_00019209 || XLOC_l2_010139 || BROAD Institute lincRNA (XLOC_l2_010139), lincRNA [TCONS_l2_00019209]	0.603226	1.41773
NM_000049	ASPA	NM_000049 || ASPA || Homo sapiens aspartoacylase (ASPA), transcript variant 1, mRNA [NM_000049]	0.602913	2.29913
NM_006584	CCT6B	NM_006584 || CCT6B || Homo sapiens chaperonin containing TCP1, subunit 6B (zeta 2) (CCT6B), transcript variant 1, mRNA [NM_006584]	0.602825	0.937511
NM_001144829	FMO5	NM_001144829 || FMO5 || Homo sapiens flavin containing monooxygenase 5 (FMO5), transcript variant 2, mRNA [NM_001144829]	0.602764	0.139665
lnc-GPR20-1:1	lnc-GPR20-1	lnc-GPR20-1:1 || lnc-GPR20-1 || LNCipedia lincRNA (lnc-GPR20-1), lincRNA [lnc-GPR20-1:1]	0.602559	2.03028
NM_032184	SYDE2	NM_032184 || SYDE2 || Homo sapiens synapse defective 1, Rho GTPase, homolog 2 (C. elegans) (SYDE2), mRNA [NM_032184]	0.602556	4.1832
NR_003205	SNORD114-12	NR_003205 || SNORD114-12 || Homo sapiens small nucleolar RNA, C/D box 114-12 (SNORD114-12), small nucleolar RNA [NR_003205]	0.601929	0.161244
NM_001744	CAMK4	NM_001744 || CAMK4 || Homo sapiens calcium/calmodulin-dependent protein kinase IV (CAMK4), mRNA [NM_001744]	0.601893	1.41773
NM_033380	COL4A5	NM_033380 || COL4A5 || Homo sapiens collagen, type IV, alpha 5 (COL4A5), transcript variant 2, mRNA [NM_033380]	0.601837	0
NM_031289	GSG1	NM_031289 || GSG1 || Homo sapiens germ cell associated 1 (GSG1), transcript variant 1, mRNA [NM_031289]	0.601743	1.75458
NM_005766	FARP1	NM_005766 || FARP1 || Homo sapiens FERM, RhoGEF (ARHGEF) and pleckstrin domain protein 1 (chondrocyte-derived) (FARP1), transcript variant 1, mRNA [NM_005766]	0.60048	0
NM_001301226	TPM2	NM_001301226 || TPM2 || Homo sapiens tropomyosin 2 (beta) (TPM2), transcript variant Tpm2.3, mRNA [NM_001301226]	0.600159	0
lnc-RP11-90M5.1.1-2:1	lnc-RP11-90M5.1.1-2	lnc-RP11-90M5.1.1-2:1 || lnc-RP11-90M5.1.1-2 || LNCipedia lincRNA (lnc-RP11-90M5.1.1-2), lincRNA [lnc-RP11-90M5.1.1-2:1]	0.600077	8.7866
NM_001024401	SBK1	NM_001024401 || SBK1 || Homo sapiens SH3 domain binding kinase 1 (SBK1), mRNA [NM_001024401]	0.600038	1.61939
NM_014583	LMCD1	NM_014583 || LMCD1 || Homo sapiens LIM and cysteine-rich domains 1 (LMCD1), transcript variant 1, mRNA [NM_014583]	0.599874	0
NM_001855	COL15A1	NM_001855 || COL15A1 || Homo sapiens collagen, type XV, alpha 1 (COL15A1), mRNA [NM_001855]	0.599664	0
NM_001010000	ARHGAP28	NM_001010000 || ARHGAP28 || Homo sapiens Rho GTPase activating protein 28 (ARHGAP28), mRNA [NM_001010000]	0.599577	0.150883
NM_000088	COL1A1	NM_000088 || COL1A1 || Homo sapiens collagen, type I, alpha 1 (COL1A1), mRNA [NM_000088]	0.599467	1.34826
ENST00000429521	ANKRD20A11P	ENST00000429521 || ANKRD20A11P || ankyrin repeat domain 20 family, member A11, pseudogene [Source:HGNC Symbol;Acc:HGNC:42024] [ENST00000429521]	0.598896	1.84524
NM_018932	PCDHB12	NM_018932 || PCDHB12 || Homo sapiens protocadherin beta 12 (PCDHB12), mRNA [NM_018932]	0.598702	0.617249
NM_139160	DEPDC7	NM_139160 || DEPDC7 || Homo sapiens DEP domain containing 7 (DEPDC7), transcript variant 2, mRNA [NM_139160]	0.598346	0.132288
NM_015660	GIMAP2	NM_015660 || GIMAP2 || Homo sapiens GTPase, IMAP family member 2 (GIMAP2), mRNA [NM_015660]	0.597886	1.00009
NM_001134445	DDAH1	NM_001134445 || DDAH1 || Homo sapiens dimethylarginine dimethylaminohydrolase 1 (DDAH1), transcript variant 2, mRNA [NM_001134445]	0.597872	1.41773
NM_032813	TMTC4	NM_032813 || TMTC4 || Homo sapiens transmembrane and tetratricopeptide repeat containing 4 (TMTC4), transcript variant 1, mRNA [NM_032813]	0.59687	0
NM_001993	F3	NM_001993 || F3 || Homo sapiens coagulation factor III (thromboplastin, tissue factor) (F3), transcript variant 1, mRNA [NM_001993]	0.596476	0
NM_178815	ARL5B	NM_178815 || ARL5B || Homo sapiens ADP-ribosylation factor-like 5B (ARL5B), mRNA [NM_178815]	0.596284	0.573249
NM_003485	GPR68	NM_003485 || GPR68 || Homo sapiens G protein-coupled receptor 68 (GPR68), transcript variant 2, mRNA [NM_003485]	0.596148	0.523125
ENST00000458154		ENST00000458154 || || Unknown	0.595811	0.170772
NM_002501	NFIX	NM_002501 || NFIX || Homo sapiens nuclear factor I/X (CCAAT-binding transcription factor) (NFIX), transcript variant 2, mRNA [NM_002501]	0.595154	0.405613
ENST00000560103		ENST00000560103 || || Unknown	0.594941	2.66656
THC2565613		THC2565613 || || PMP22_HUMAN (Q01453) Peripheral myelin protein 22 (PMP-22), complete [THC2565613]	0.593795	3.06663
NM_001278141	NBPF12	NM_001278141 || NBPF12 || Homo sapiens neuroblastoma breakpoint family, member 12 (NBPF12), mRNA [NM_001278141]	0.593682	0.145338
lnc-EXD2-1:2	lnc-EXD2-1	lnc-EXD2-1:2 || lnc-EXD2-1 || Q21RF1_9BURK (Q21RF1) Biotin--acetyl-CoA-carboxylase ligase, partial (6%) [THC2728144]	0.593413	5.796
NM_000892	KLKB1	NM_000892 || KLKB1 || Homo sapiens kallikrein B, plasma (Fletcher factor) 1 (KLKB1), mRNA [NM_000892]	0.593342	2.08097
NM_018689	CEMIP	NM_018689 || CEMIP || Homo sapiens cell migration inducing protein, hyaluronan binding (CEMIP), transcript variant 3, mRNA [NM_018689]	0.592758	2.0077
lnc-CLVS1-1:4	lnc-CLVS1-1	lnc-CLVS1-1:4 || lnc-CLVS1-1 || LNCipedia lincRNA (lnc-CLVS1-1), lincRNA [lnc-CLVS1-1:4]	0.592384	0
NM_001167986	INCA1	NM_001167986 || INCA1 || Homo sapiens inhibitor of CDK, cyclin A1 interacting protein 1 (INCA1), transcript variant 1, mRNA [NM_001167986]	0.592228	7.81615
lnc-SLC6A12-5:1	lnc-SLC6A12-5	lnc-SLC6A12-5:1 || lnc-SLC6A12-5 || LNCipedia lincRNA (lnc-SLC6A12-5), lincRNA [lnc-SLC6A12-5:1]	0.592007	2.29913
ENST00000449819	LOC100506797	ENST00000449819 || LOC100506797 || PREDICTED: Homo sapiens uncharacterized LOC100506797 (LOC100506797), transcript variant X1, ncRNA [XR_112377]	0.591721	0.961569
lnc-EPSTI1-1:1	lnc-EPSTI1-1	lnc-EPSTI1-1:1 || lnc-EPSTI1-1 || LNCipedia lincRNA (lnc-EPSTI1-1), lincRNA [lnc-EPSTI1-1:1]	0.591703	0.63476
NM_001098816	TENM4	NM_001098816 || TENM4 || Homo sapiens teneurin transmembrane protein 4 (TENM4), mRNA [NM_001098816]	0.5917	0.883581
AK128269	LOC100130276	AK128269 || LOC100130276 || Homo sapiens cDNA FLJ46406 fis, clone THYMU3009755. [AK128269]	0.591516	1.61939
NM_001080406	C12orf71	NM_001080406 || C12orf71 || Homo sapiens chromosome 12 open reading frame 71 (C12orf71), mRNA [NM_001080406]	0.591271	0.42392
ENST00000553211		ENST00000553211 || || 603057569F1 NIH_MGC_122 Homo sapiens cDNA clone IMAGE:5207128 5', mRNA sequence [BI767423]	0.590745	0.607365
NM_014326	DAPK2	NM_014326 || DAPK2 || Homo sapiens death-associated protein kinase 2 (DAPK2), mRNA [NM_014326]	0.590419	0.157857
NR_038996	USP30-AS1	NR_038996 || USP30-AS1 || Homo sapiens USP30 antisense RNA 1 (USP30-AS1), long non-coding RNA [NR_038996]	0.590395	0.418606
lnc-FSCN2-1:2	lnc-FSCN2-1	lnc-FSCN2-1:2 || lnc-FSCN2-1 || ALU7_HUMAN (P39194) Alu subfamily SQ sequence contamination warning entry, partial (11%) [THC2721173]	0.590383	3.17572
lnc-MBLAC1-1:1	lnc-MBLAC1-1	lnc-MBLAC1-1:1 || lnc-MBLAC1-1 || LNCipedia lincRNA (lnc-MBLAC1-1), lincRNA [lnc-MBLAC1-1:1]	0.590247	7.58603
NM_001190438	NCOR1	NM_001190438 || NCOR1 || Homo sapiens nuclear receptor corepressor 1 (NCOR1), transcript variant 2, mRNA [NM_001190438]	0.589777	0.839754
NM_001024074	HNMT	NM_001024074 || HNMT || Homo sapiens histamine N-methyltransferase (HNMT), transcript variant 2, mRNA [NM_001024074]	0.589586	0.331987
A_33_P3223142		A_33_P3223142 || unmapped	0.589585	0
THC2706532		THC2706532 || || Unknown	0.589481	1.12907
NM_005780	LHFP	NM_005780 || LHFP || Homo sapiens lipoma HMGIC fusion partner (LHFP), mRNA [NM_005780]	0.588938	0
lnc-C9orf89-1:2	lnc-C9orf89-1	lnc-C9orf89-1:2 || lnc-C9orf89-1 || LNCipedia lincRNA (lnc-C9orf89-1), lincRNA [lnc-C9orf89-1:2]	0.588909	5.796
NM_032823	C9orf3	NM_032823 || C9orf3 || Homo sapiens chromosome 9 open reading frame 3 (C9orf3), transcript variant 2, mRNA [NM_032823]	0.588742	0.411161
NM_004772	NREP	NM_004772 || NREP || Homo sapiens neuronal regeneration related protein (NREP), transcript variant 1, mRNA [NM_004772]	0.588149	0
NM_172244	SGCD	NM_172244 || SGCD || Homo sapiens sarcoglycan, delta (35kDa dystrophin-associated glycoprotein) (SGCD), transcript variant 2, mRNA [NM_172244]	0.587895	1.04276
NM_002334	LRP4	NM_002334 || LRP4 || Homo sapiens low density lipoprotein receptor-related protein 4 (LRP4), mRNA [NM_002334]	0.587629	0
NM_002959	SORT1	NM_002959 || SORT1 || Homo sapiens sortilin 1 (SORT1), transcript variant 1, mRNA [NM_002959]	0.587598	0
NM_005822	RCAN2	NM_005822 || RCAN2 || Homo sapiens regulator of calcineurin 2 (RCAN2), transcript variant 1, mRNA [NM_005822]	0.587527	0
NR_002563	SNORD27	NR_002563 || SNORD27 || Homo sapiens small nucleolar RNA, C/D box 27 (SNORD27), small nucleolar RNA [NR_002563]	0.587195	3.68079
NM_021229	NTN4	NM_021229 || NTN4 || Homo sapiens netrin 4 (NTN4), mRNA [NM_021229]	0.587079	0
NM_004010	DMD	NM_004010 || DMD || Homo sapiens dystrophin (DMD), transcript variant Dp427p2, mRNA [NM_004010]	0.587024	0.753658
NM_004349	RUNX1T1	NM_004349 || RUNX1T1 || Homo sapiens runt-related transcription factor 1; translocated to, 1 (cyclin D-related) (RUNX1T1), transcript variant 1, mRNA [NM_004349]	0.586661	0.546471
NM_017523	XAF1	NM_017523 || XAF1 || Homo sapiens XIAP associated factor 1 (XAF1), transcript variant 1, mRNA [NM_017523]	0.586632	0.327644
ENST00000535229	PDE10A	ENST00000535229 || PDE10A || phosphodiesterase 10A [Source:HGNC Symbol;Acc:HGNC:8772] [ENST00000535229]	0.586311	1.45997
ENST00000333995	FAM9C	ENST00000333995 || FAM9C || family with sequence similarity 9, member C [Source:HGNC Symbol;Acc:HGNC:18405] [ENST00000333995]	0.586063	2.20356
NM_018930	PCDHB10	NM_018930 || PCDHB10 || Homo sapiens protocadherin beta 10 (PCDHB10), mRNA [NM_018930]	0.585757	2.50909
ENST00000525654		ENST00000525654 || || Unknown	0.58555	1.12907
NR_038135	MGAT4EP	NR_038135 || MGAT4EP || Homo sapiens MGAT4 family, member E, pseudogene (MGAT4EP), non-coding RNA [NR_038135]	0.585312	0.25428
lnc-N4BP2-1:1	lnc-N4BP2-1	lnc-N4BP2-1:1 || lnc-N4BP2-1 || ALU6_HUMAN (P39193) Alu subfamily SP sequence contamination warning entry, partial (8%) [THC2533503]	0.585075	0.732131
NM_001031690	FAM131B	NM_001031690 || FAM131B || Homo sapiens family with sequence similarity 131, member B (FAM131B), transcript variant a, mRNA [NM_001031690]	0.584952	1.43927
NM_001037675	NBPF9	NM_001037675 || NBPF9 || Homo sapiens neuroblastoma breakpoint family, member 9 (NBPF9), transcript variant 2, mRNA [NM_001037675]	0.584898	0
ENST00000413124	LINC00424	ENST00000413124 || LINC00424 || long intergenic non-protein coding RNA 424 [Source:HGNC Symbol;Acc:HGNC:42815] [ENST00000413124]	0.584786	0
NM_016563	RASL12	NM_016563 || RASL12 || Homo sapiens RAS-like, family 12 (RASL12), mRNA [NM_016563]	0.584362	2.08097
NR_003341	SNORD116-27	NR_003341 || SNORD116-27 || Homo sapiens small nucleolar RNA, C/D box 116-27 (SNORD116-27), small nucleolar RNA [NR_003341]	0.5838	1.29369
NR_110901	GLIS2-AS1	NR_110901 || GLIS2-AS1 || Homo sapiens GLIS2 antisense RNA 1 (GLIS2-AS1), long non-coding RNA [NR_110901]	0.583795	0.839754
XR_427907	LOC102723346	XR_427907 || LOC102723346 || PREDICTED: Homo sapiens uncharacterized LOC102723346 (LOC102723346), transcript variant X1, ncRNA [XR_427907]	0.583703	3.50317
NM_005746	NAMPT	NM_005746 || NAMPT || Homo sapiens nicotinamide phosphoribosyltransferase (NAMPT), mRNA [NM_005746]	0.583656	0
A_33_P3295705		A_33_P3295705 || unmapped	0.583525	0.70517
NM_000633	BCL2	NM_000633 || BCL2 || Homo sapiens B-cell CLL/lymphoma 2 (BCL2), transcript variant alpha, mRNA [NM_000633]	0.583422	0.537993
NM_001336	CTSZ	NM_001336 || CTSZ || Homo sapiens cathepsin Z (CTSZ), mRNA [NM_001336]	0.583146	0
NM_001093726	SEPP1	NM_001093726 || SEPP1 || Homo sapiens selenoprotein P, plasma, 1 (SEPP1), transcript variant 3, mRNA [NM_001093726]	0.582925	0.491109
ENST00000429019	LOC389199	ENST00000429019 || LOC389199 || PREDICTED: Homo sapiens uncharacterized LOC389199 (LOC389199), misc_RNA [XR_112616]	0.58264	0
NM_033641	COL4A6	NM_033641 || COL4A6 || Homo sapiens collagen, type IV, alpha 6 (COL4A6), transcript variant B, mRNA [NM_033641]	0.582623	0
NM_003495	HIST1H4I	NM_003495 || HIST1H4I || Homo sapiens histone cluster 1, H4i (HIST1H4I), mRNA [NM_003495]	0.582013	0.604665
NM_020927	VAT1L	NM_020927 || VAT1L || Homo sapiens vesicle amine transport 1-like (VAT1L), mRNA [NM_020927]	0.581979	0
lnc-TEKT3-1:1	lnc-TEKT3-1	lnc-TEKT3-1:1 || lnc-TEKT3-1 || Homo sapiens mRNA; cDNA DKFZp686P21116 (from clone DKFZp686P21116). [AL833462]	0.581783	1.97949
ENST00000359193	HIST1H2AG	ENST00000359193 || HIST1H2AG || histone cluster 1, H2ag [Source:HGNC Symbol;Acc:HGNC:4737] [ENST00000359193]	0.581576	8.4009
lnc-SPIRE2-1:1	lnc-SPIRE2-1	lnc-SPIRE2-1:1 || lnc-SPIRE2-1 || Homo sapiens cDNA clone IMAGE:5265909. [BC035173]	0.580841	0.732131
NM_016300	ARPP21	NM_016300 || ARPP21 || Homo sapiens cAMP-regulated phosphoprotein, 21kDa (ARPP21), transcript variant 1, mRNA [NM_016300]	0.580625	3.41056
NM_001202	BMP4	NM_001202 || BMP4 || Homo sapiens bone morphogenetic protein 4 (BMP4), transcript variant 1, mRNA [NM_001202]	0.580479	0
ENST00000369851	GNAI3	ENST00000369851 || GNAI3 || guanine nucleotide binding protein (G protein), alpha inhibiting activity polypeptide 3 [Source:HGNC Symbol;Acc:HGNC:4387] [ENST00000369851]	0.580256	0.491109
NM_001017535	VDR	NM_001017535 || VDR || Homo sapiens vitamin D (1,25- dihydroxyvitamin D3) receptor (VDR), transcript variant 2, mRNA [NM_001017535]	0.580067	0
AK093857	LOC285181	AK093857 || LOC285181 || Homo sapiens cDNA FLJ36538 fis, clone TRACH2005159. [AK093857]	0.577193	1.12907
NM_152754	SEMA3D	NM_152754 || SEMA3D || Homo sapiens sema domain, immunoglobulin domain (Ig), short basic domain, secreted, (semaphorin) 3D (SEMA3D), mRNA [NM_152754]	0.576761	0
NM_000596	IGFBP1	NM_000596 || IGFBP1 || Homo sapiens insulin-like growth factor binding protein 1 (IGFBP1), mRNA [NM_000596]	0.576633	0.411161
NM_152487	TMEM56	NM_152487 || TMEM56 || Homo sapiens transmembrane protein 56 (TMEM56), transcript variant 2, mRNA [NM_152487]	0.576498	0.617249
NM_019036	HMGCLL1	NM_019036 || HMGCLL1 || Homo sapiens 3-hydroxymethyl-3-methylglutaryl-CoA lyase-like 1 (HMGCLL1), transcript variant 1, mRNA [NM_019036]	0.576242	1.15956
NM_152908	SLC47A2	NM_152908 || SLC47A2 || Homo sapiens solute carrier family 47 (multidrug and toxin extrusion), member 2 (SLC47A2), transcript variant 1, mRNA [NM_152908]	0.575137	1.75458
NM_153608	ZNF114	NM_153608 || ZNF114 || Homo sapiens zinc finger protein 114 (ZNF114), transcript variant 1, mRNA [NM_153608]	0.574612	6.80203
NM_030915	LBH	NM_030915 || LBH || Homo sapiens limb bud and heart development (LBH), mRNA [NM_030915]	0.574119	0.148497
NR_027152	PRR26	NR_027152 || PRR26 || Homo sapiens proline rich 26 (PRR26), transcript variant 1, long non-coding RNA [NR_027152]	0.573798	1.41773
NM_201433	GAS7	NM_201433 || GAS7 || Homo sapiens growth arrest-specific 7 (GAS7), transcript variant c, mRNA [NM_201433]	0.573701	0.247577
XR_424759	MMP25-AS1	XR_424759 || MMP25-AS1 || PREDICTED: Homo sapiens uncharacterized LOC100507419 (RP11-473M20.7), transcript variant X3, ncRNA [XR_424759]	0.572884	2.29913
NM_001100170	IMMT	NM_001100170 || IMMT || Homo sapiens inner membrane protein, mitochondrial (IMMT), transcript variant 3, mRNA [NM_001100170]	0.572874	0.491109
NR_026850	MTMR9LP	NR_026850 || MTMR9LP || Homo sapiens myotubularin related protein 9-like, pseudogene (MTMR9LP), non-coding RNA [NR_026850]	0.571708	0
NM_001098808	C9orf129	NM_001098808 || C9orf129 || Homo sapiens chromosome 9 open reading frame 129 (C9orf129), mRNA [NM_001098808]	0.571525	0
NM_199461	NANOS1	NM_199461 || NANOS1 || Homo sapiens nanos homolog 1 (Drosophila) (NANOS1), mRNA [NM_199461]	0.570472	0
NM_001034077	HIST2H4B	NM_001034077 || HIST2H4B || Homo sapiens histone cluster 2, H4b (HIST2H4B), mRNA [NM_001034077]	0.570277	0.513377
NM_016651	DACT1	NM_016651 || DACT1 || Homo sapiens dishevelled-binding antagonist of beta-catenin 1 (DACT1), transcript variant 1, mRNA [NM_016651]	0.56979	0.145338
ENST00000576854	YWHAE	ENST00000576854 || YWHAE || tyrosine 3-monooxygenase/tryptophan 5-monooxygenase activation protein, epsilon [Source:HGNC Symbol;Acc:HGNC:12851] [ENST00000576854]	0.569068	0.161244
NM_004843	IL27RA	NM_004843 || IL27RA || Homo sapiens interleukin 27 receptor, alpha (IL27RA), mRNA [NM_004843]	0.568716	0
NM_139155	ADAMTS14	NM_139155 || ADAMTS14 || Homo sapiens ADAM metallopeptidase with thrombospondin type 1 motif, 14 (ADAMTS14), transcript variant 1, mRNA [NM_139155]	0.56859	0
NM_000212	ITGB3	NM_000212 || ITGB3 || Homo sapiens integrin, beta 3 (platelet glycoprotein IIIa, antigen CD61) (ITGB3), mRNA [NM_000212]	0.568178	0
NM_017643	MBTD1	NM_017643 || MBTD1 || Homo sapiens mbt domain containing 1 (MBTD1), mRNA [NM_017643]	0.56782	0
NM_003238	TGFB2	NM_003238 || TGFB2 || Homo sapiens transforming growth factor, beta 2 (TGFB2), transcript variant 2, mRNA [NM_003238]	0.567772	1.60172
NM_006714	SMPDL3A	NM_006714 || SMPDL3A || Homo sapiens sphingomyelin phosphodiesterase, acid-like 3A (SMPDL3A), transcript variant 1, mRNA [NM_006714]	0.567582	0
NR_003326	SNORD116-11	NR_003326 || SNORD116-11 || Homo sapiens small nucleolar RNA, C/D box 116-11 (SNORD116-11), small nucleolar RNA [NR_003326]	0.566575	1.34826
TCONS_l2_00030259	XLOC_l2_015561	TCONS_l2_00030259 || XLOC_l2_015561 || BROAD Institute lincRNA (XLOC_l2_015561), lincRNA [TCONS_l2_00030259]	0.566129	0.753658
ENST00000580242		ENST00000580242 || || Unknown	0.566	2.03028
NM_203377	MB	NM_203377 || MB || Homo sapiens myoglobin (MB), transcript variant 2, mRNA [NM_203377]	0.565206	5.99377
NR_003207	SNORD114-14	NR_003207 || SNORD114-14 || Homo sapiens small nucleolar RNA, C/D box 114-14 (SNORD114-14), small nucleolar RNA [NR_003207]	0.56475	0.839754
lnc-RP11-293M10.1.1-1:1	lnc-RP11-293M10.1.1-1	lnc-RP11-293M10.1.1-1:1 || lnc-RP11-293M10.1.1-1 || Homo sapiens mRNA; cDNA DKFZp686J0581 (from clone DKFZp686J0581). [BX647685]	0.564665	1.43927
NM_006446	SLCO1B1	NM_006446 || SLCO1B1 || Homo sapiens solute carrier organic anion transporter family, member 1B1 (SLCO1B1), mRNA [NM_006446]	0.564385	1.58239
ENST00000507579		ENST00000507579 || || BX110533 NCI_CGAP_GC6 Homo sapiens cDNA clone IMAGp998D185541, mRNA sequence [BX110533]	0.564061	0.631073
NR_034124	LINC01270	NR_034124 || LINC01270 || Homo sapiens long intergenic non-protein coding RNA 1270 (LINC01270), long non-coding RNA [NR_034124]	0.563426	0.148497
NM_021979	HSPA2	NM_021979 || HSPA2 || Homo sapiens heat shock 70kDa protein 2 (HSPA2), mRNA [NM_021979]	0.562767	0
NM_002899	RBP1	NM_002899 || RBP1 || Homo sapiens retinol binding protein 1, cellular (RBP1), transcript variant 1, mRNA [NM_002899]	0.562418	0
NM_207481	NCKAP5	NM_207481 || NCKAP5 || Homo sapiens NCK-associated protein 5 (NCKAP5), transcript variant 2, mRNA [NM_207481]	0.562257	0.256888
NM_033292	CASP1	NM_033292 || CASP1 || Homo sapiens caspase 1, apoptosis-related cysteine peptidase (CASP1), transcript variant alpha, mRNA [NM_033292]	0.562107	0
NM_002923	RGS2	NM_002923 || RGS2 || Homo sapiens regulator of G-protein signaling 2 (RGS2), mRNA [NM_002923]	0.562053	0
NM_178445	ACKR4	NM_178445 || ACKR4 || Homo sapiens atypical chemokine receptor 4 (ACKR4), transcript variant 1, mRNA [NM_178445]	0.561138	0.491109
NM_000337	SGCD	NM_000337 || SGCD || Homo sapiens sarcoglycan, delta (35kDa dystrophin-associated glycoprotein) (SGCD), transcript variant 1, mRNA [NM_000337]	0.560115	0
NM_002053	GBP1	NM_002053 || GBP1 || Homo sapiens guanylate binding protein 1, interferon-inducible (GBP1), mRNA [NM_002053]	0.560042	0
NM_017770	ELOVL2	NM_017770 || ELOVL2 || Homo sapiens ELOVL fatty acid elongase 2 (ELOVL2), mRNA [NM_017770]	0.560029	0
NR_024274	CDKN2A-AS1	NR_024274 || CDKN2A-AS1 || Homo sapiens CDKN2A antisense RNA 1 (head to head) (CDKN2A-AS1), long non-coding RNA [NR_024274]	0.556923	0
NM_213674	TPM2	NM_213674 || TPM2 || Homo sapiens tropomyosin 2 (beta) (TPM2), transcript variant Tpm2.1, mRNA [NM_213674]	0.55653	0
NM_001002294	FMO3	NM_001002294 || FMO3 || Homo sapiens flavin containing monooxygenase 3 (FMO3), transcript variant 2, mRNA [NM_001002294]	0.555302	0
NM_003235	TG	NM_003235 || TG || Homo sapiens thyroglobulin (TG), mRNA [NM_003235]	0.554952	0.513377
NM_181501	ITGA1	NM_181501 || ITGA1 || Homo sapiens integrin, alpha 1 (ITGA1), mRNA [NM_181501]	0.554648	0
NM_138994	CNTNAP4	NM_138994 || CNTNAP4 || Homo sapiens contactin associated protein-like 4 (CNTNAP4), transcript variant 2, mRNA [NM_138994]	0.554388	0.137619
NM_018476	BEX1	NM_018476 || BEX1 || Homo sapiens brain expressed, X-linked 1 (BEX1), mRNA [NM_018476]	0.554259	1.05182
lnc-CTD-2203A3.1.1-2:1	lnc-CTD-2203A3.1.1-2	lnc-CTD-2203A3.1.1-2:1 || lnc-CTD-2203A3.1.1-2 || LNCipedia lincRNA (lnc-CTD-2203A3.1.1-2), lincRNA [lnc-CTD-2203A3.1.1-2:1]	0.554088	0
ENST00000343318	LRRD1	ENST00000343318 || LRRD1 || leucine-rich repeats and death domain containing 1 [Source:HGNC Symbol;Acc:HGNC:34300] [ENST00000343318]	0.553624	1.97949
ENST00000449158	GRM7-AS3	ENST00000449158 || GRM7-AS3 || GRM7 antisense RNA 3 [Source:HGNC Symbol;Acc:HGNC:42444] [ENST00000449158]	0.553431	1.02318
NM_001204088	MINOS1-NBL1	NM_001204088 || MINOS1-NBL1 || Homo sapiens MINOS1-NBL1 readthrough (MINOS1-NBL1), transcript variant 1, mRNA [NM_001204088]	0.552996	0
NM_019590	KIAA1217	NM_019590 || KIAA1217 || Homo sapiens KIAA1217 (KIAA1217), transcript variant 1, mRNA [NM_019590]	0.552954	0
A_33_P3315634		A_33_P3315634 || unmapped	0.552897	1.34826
NM_001206572	SORCS1	NM_001206572 || SORCS1 || Homo sapiens sortilin-related VPS10 domain containing receptor 1 (SORCS1), transcript variant 6, mRNA [NM_001206572]	0.552553	0.331987
NM_012223	MYO1B	NM_012223 || MYO1B || Homo sapiens myosin IB (MYO1B), transcript variant 2, mRNA [NM_012223]	0.552504	0
NM_001299	CNN1	NM_001299 || CNN1 || Homo sapiens calponin 1, basic, smooth muscle (CNN1), mRNA [NM_001299]	0.552284	0
NM_030632	ASXL3	NM_030632 || ASXL3 || Homo sapiens additional sex combs like transcriptional regulator 3 (ASXL3), mRNA [NM_030632]	0.552207	0.161244
NM_182966	NEDD9	NM_182966 || NEDD9 || Homo sapiens neural precursor cell expressed, developmentally down-regulated 9 (NEDD9), transcript variant 2, mRNA [NM_182966]	0.552143	1.58239
NM_013261	PPARGC1A	NM_013261 || PPARGC1A || Homo sapiens peroxisome proliferator-activated receptor gamma, coactivator 1 alpha (PPARGC1A), mRNA [NM_013261]	0.550547	0.137619
NM_020747	ZNF608	NM_020747 || ZNF608 || Homo sapiens zinc finger protein 608 (ZNF608), mRNA [NM_020747]	0.55034	0
NM_053025	MYLK	NM_053025 || MYLK || Homo sapiens myosin light chain kinase (MYLK), transcript variant 1, mRNA [NM_053025]	0.549961	0
ENST00000418076		ENST00000418076 || || furry homolog (Drosophila) [Source:HGNC Symbol;Acc:HGNC:20367] [ENST00000418076]	0.549379	0.247577
NR_003016	SNORA26	NR_003016 || SNORA26 || Homo sapiens small nucleolar RNA, H/ACA box 26 (SNORA26), small nucleolar RNA [NR_003016]	0.549272	0.411161
NM_013322	SNX10	NM_013322 || SNX10 || Homo sapiens sorting nexin 10 (SNX10), transcript variant 2, mRNA [NM_013322]	0.549145	7.58603
NM_032849	MEDAG	NM_032849 || MEDAG || Homo sapiens mesenteric estrogen-dependent adipogenesis (MEDAG), mRNA [NM_032849]	0.548665	0.155892
NM_001001522	TAGLN	NM_001001522 || TAGLN || Homo sapiens transgelin (TAGLN), transcript variant 1, mRNA [NM_001001522]	0.548601	0
NM_020731	AHRR	NM_020731 || AHRR || Homo sapiens aryl-hydrocarbon receptor repressor (AHRR), transcript variant 1, mRNA [NM_020731]	0.548319	0
NM_080607	VSTM2L	NM_080607 || VSTM2L || Homo sapiens V-set and transmembrane domain containing 2 like (VSTM2L), mRNA [NM_080607]	0.548104	1.09198
NM_006378	SEMA4D	NM_006378 || SEMA4D || Homo sapiens sema domain, immunoglobulin domain (Ig), transmembrane domain (TM) and short cytoplasmic domain, (semaphorin) 4D (SEMA4D), transcript variant 1, mRNA [NM_006378]	0.547164	0.161244
NM_001161404	LIMS2	NM_001161404 || LIMS2 || Homo sapiens LIM and senescent cell antigen-like domains 2 (LIMS2), transcript variant 5, mRNA [NM_001161404]	0.54706	0
ENST00000520239		ENST00000520239 || || Unknown	0.545117	0
NM_144629	RFTN2	NM_144629 || RFTN2 || Homo sapiens raftlin family member 2 (RFTN2), mRNA [NM_144629]	0.543832	0
NM_001393	ECM2	NM_001393 || ECM2 || Homo sapiens extracellular matrix protein 2, female organ and adipocyte specific (ECM2), transcript variant 1, mRNA [NM_001393]	0.543699	0.839754
NM_001002919	FAM150B	NM_001002919 || FAM150B || Homo sapiens family with sequence similarity 150, member B (FAM150B), mRNA [NM_001002919]	0.543069	0
NM_002462	MX1	NM_002462 || MX1 || Homo sapiens MX dynamin-like GTPase 1 (MX1), transcript variant 2, mRNA [NM_002462]	0.542932	2.20356
NM_013313	YPEL1	NM_013313 || YPEL1 || Homo sapiens yippee-like 1 (Drosophila) (YPEL1), mRNA [NM_013313]	0.542541	0
NM_014867	KBTBD11	NM_014867 || KBTBD11 || Homo sapiens kelch repeat and BTB (POZ) domain containing 11 (KBTBD11), mRNA [NM_014867]	0.542455	0
THC2612433		THC2612433 || || Q8C788_MOUSE (Q8C788) 13 days embryo heart cDNA, RIKEN full-length enriched library, clone:D330033C12 product:sorting nexin associated golgi protein 1, full insert sequence, partial (24%) [THC2612433]	0.542146	0.573249
ENST00000593292	ZNF91	ENST00000593292 || ZNF91 || zinc finger protein 91 [Source:HGNC Symbol;Acc:HGNC:13166] [ENST00000593292]	0.541327	0.150883
NM_173653	SLC9A9	NM_173653 || SLC9A9 || Homo sapiens solute carrier family 9, subfamily A (NHE9, cation proton antiporter 9), member 9 (SLC9A9), mRNA [NM_173653]	0.541208	0
lnc-ANP32A-3:3	lnc-ANP32A-3	lnc-ANP32A-3:3 || lnc-ANP32A-3 || Homo sapiens cDNA FLJ32231 fis, clone PLACE6004491. [AK056793]	0.540606	0.484148
NM_000961	PTGIS	NM_000961 || PTGIS || Homo sapiens prostaglandin I2 (prostacyclin) synthase (PTGIS), mRNA [NM_000961]	0.54035	0
NM_012338	TSPAN12	NM_012338 || TSPAN12 || Homo sapiens tetraspanin 12 (TSPAN12), mRNA [NM_012338]	0.539444	0.42392
NR_073096	SERAC1	NR_073096 || SERAC1 || Homo sapiens serine active site containing 1 (SERAC1), transcript variant 2, non-coding RNA [NR_073096]	0.538665	0.546471
NM_030636	EEPD1	NM_030636 || EEPD1 || Homo sapiens endonuclease/exonuclease/phosphatase family domain containing 1 (EEPD1), mRNA [NM_030636]	0.538318	0
NM_022169	ABCG4	NM_022169 || ABCG4 || Homo sapiens ATP-binding cassette, sub-family G (WHITE), member 4 (ABCG4), transcript variant 1, mRNA [NM_022169]	0.538013	0.256888
NM_015170	SULF1	NM_015170 || SULF1 || Homo sapiens sulfatase 1 (SULF1), transcript variant 3, mRNA [NM_015170]	0.537958	0
NM_020433	JPH2	NM_020433 || JPH2 || Homo sapiens junctophilin 2 (JPH2), transcript variant 1, mRNA [NM_020433]	0.537499	0.288555
NM_005204	MAP3K8	NM_005204 || MAP3K8 || Homo sapiens mitogen-activated protein kinase kinase kinase 8 (MAP3K8), transcript variant 1, mRNA [NM_005204]	0.537381	1.45997
ENST00000478815		ENST00000478815 || || ring finger protein 183 [Source:HGNC Symbol;Acc:HGNC:28721] [ENST00000478815]	0.537099	0
NM_033138	CALD1	NM_033138 || CALD1 || Homo sapiens caldesmon 1 (CALD1), transcript variant 1, mRNA [NM_033138]	0.536998	0
NM_001171610	LDB3	NM_001171610 || LDB3 || Homo sapiens LIM domain binding 3 (LDB3), transcript variant 5, mRNA [NM_001171610]	0.536568	0.537993
NM_015508	TIPARP	NM_015508 || TIPARP || Homo sapiens TCDD-inducible poly(ADP-ribose) polymerase (TIPARP), transcript variant 2, mRNA [NM_015508]	0.53569	0
NM_025135	FHOD3	NM_025135 || FHOD3 || Homo sapiens formin homology 2 domain containing 3 (FHOD3), transcript variant 1, mRNA [NM_025135]	0.535415	0
lnc-SCCPDH-1:4	lnc-SCCPDH-1	lnc-SCCPDH-1:4 || lnc-SCCPDH-1 || LNCipedia lincRNA (lnc-SCCPDH-1), lincRNA [lnc-SCCPDH-1:4]	0.535085	0
NM_003613	CILP	NM_003613 || CILP || Homo sapiens cartilage intermediate layer protein, nucleotide pyrophosphohydrolase (CILP), mRNA [NM_003613]	0.534424	1.43927
ENST00000430320		ENST00000430320 || || Unknown	0.53385	1.93466
NM_017508	SOX6	NM_017508 || SOX6 || Homo sapiens SRY (sex determining region Y)-box 6 (SOX6), transcript variant 1, mRNA [NM_017508]	0.533726	0
ENST00000328963	P2RX7	ENST00000328963 || P2RX7 || purinergic receptor P2X, ligand-gated ion channel, 7 [Source:HGNC Symbol;Acc:HGNC:8537] [ENST00000328963]	0.53284	0.170772
ENST00000587298	WFDC21P	ENST00000587298 || WFDC21P || WAP four-disulfide core domain 21, pseudogene [Source:HGNC Symbol;Acc:HGNC:50357] [ENST00000587298]	0.530307	0
XR_424829	LOC339192	XR_424829 || LOC339192 || PREDICTED: Homo sapiens uncharacterized LOC339192 (LOC339192), transcript variant X3, ncRNA [XR_424829]	0.530184	0.42392
ENST00000526674		ENST00000526674 || || Unknown	0.530054	0.523125
lnc-GCA-4:1	lnc-GCA-4	lnc-GCA-4:1 || lnc-GCA-4 || LNCipedia lincRNA (lnc-GCA-4), lincRNA [lnc-GCA-4:1]	0.529451	0
NR_026860	LINC00473	NR_026860 || LINC00473 || Homo sapiens long intergenic non-protein coding RNA 473 (LINC00473), transcript variant 1, long non-coding RNA [NR_026860]	0.529308	0
NM_001008539	SLC7A2	NM_001008539 || SLC7A2 || Homo sapiens solute carrier family 7 (cationic amino acid transporter, y+ system), member 2 (SLC7A2), transcript variant 2, mRNA [NM_001008539]	0.528731	0
NM_032800	C1orf198	NM_032800 || C1orf198 || Homo sapiens chromosome 1 open reading frame 198 (C1orf198), transcript variant 1, mRNA [NM_032800]	0.528326	0
NM_000064	C3	NM_000064 || C3 || Homo sapiens complement component 3 (C3), mRNA [NM_000064]	0.5281	0
ENST00000492720	DENND2A	ENST00000492720 || DENND2A || DENN/MADD domain containing 2A [Source:HGNC Symbol;Acc:HGNC:22212] [ENST00000492720]	0.527922	2.03028
XR_242288	LOC101929580	XR_242288 || LOC101929580 || PREDICTED: Homo sapiens uncharacterized LOC101929580 (LOC101929580), transcript variant X1, ncRNA [XR_242288]	0.527805	1.45997
NM_013353	TMOD4	NM_013353 || TMOD4 || Homo sapiens tropomodulin 4 (muscle) (TMOD4), mRNA [NM_013353]	0.526095	1.00009
NM_006169	NNMT	NM_006169 || NNMT || Homo sapiens nicotinamide N-methyltransferase (NNMT), mRNA [NM_006169]	0.525936	0
NM_020692	GALNT16	NM_020692 || GALNT16 || Homo sapiens polypeptide N-acetylgalactosaminyltransferase 16 (GALNT16), transcript variant 2, mRNA [NM_020692]	0.525887	0
NM_000705	ATP4B	NM_000705 || ATP4B || Homo sapiens ATPase, H+/K+ exchanging, beta polypeptide (ATP4B), mRNA [NM_000705]	0.525178	0.42392
NM_005618	DLL1	NM_005618 || DLL1 || Homo sapiens delta-like 1 (Drosophila) (DLL1), mRNA [NM_005618]	0.524768	0
A_33_P3247678		A_33_P3247678 || unmapped	0.523809	2.03028
NM_207413	FAM150A	NM_207413 || FAM150A || Homo sapiens family with sequence similarity 150, member A (FAM150A), mRNA [NM_207413]	0.523428	0
lnc-ECT2-1:1	lnc-ECT2-1	lnc-ECT2-1:1 || lnc-ECT2-1 || Homo sapiens cDNA FLJ44999 fis, clone BRAWH3011101. [AK126946]	0.523267	0
NM_006472	TXNIP	NM_006472 || TXNIP || Homo sapiens thioredoxin interacting protein (TXNIP), mRNA [NM_006472]	0.522996	0
NM_033316	MFI2	NM_033316 || MFI2 || Homo sapiens antigen p97 (melanoma associated) identified by monoclonal antibodies 133.2 and 96.5 (MFI2), transcript variant 2, mRNA [NM_033316]	0.522577	6.80203
lnc-OLIG2-1:1	lnc-OLIG2-1	lnc-OLIG2-1:1 || lnc-OLIG2-1 || LNCipedia lincRNA (lnc-OLIG2-1), lincRNA [lnc-OLIG2-1:1]	0.521926	0.16442
NM_006671	SLC1A7	NM_006671 || SLC1A7 || Homo sapiens solute carrier family 1 (glutamate transporter), member 7 (SLC1A7), transcript variant 4, mRNA [NM_006671]	0.52108	0
ENST00000521718		ENST00000521718 || || PREDICTED: Homo sapiens uncharacterized LOC102724880 (LOC102724880), ncRNA [XR_426282]	0.519271	0.484148
NR_037877	LOC100505912	NR_037877 || LOC100505912 || Homo sapiens uncharacterized LOC100505912 (LOC100505912), long non-coding RNA [NR_037877]	0.518642	0.513377
NM_014817	TRIL	NM_014817 || TRIL || Homo sapiens TLR4 interactor with leucine-rich repeats (TRIL), mRNA [NM_014817]	0.517179	0.155892
NM_001254752	UQCRB	NM_001254752 || UQCRB || Homo sapiens ubiquinol-cytochrome c reductase binding protein (UQCRB), transcript variant 3, mRNA [NM_001254752]	0.516175	0.411161
NM_013251	TAC3	NM_013251 || TAC3 || Homo sapiens tachykinin 3 (TAC3), transcript variant 1, mRNA [NM_013251]	0.514917	0
NM_001160419	ZBP1	NM_001160419 || ZBP1 || Homo sapiens Z-DNA binding protein 1 (ZBP1), transcript variant 4, mRNA [NM_001160419]	0.514556	0
NM_018400	SCN3B	NM_018400 || SCN3B || Homo sapiens sodium channel, voltage gated, type III beta subunit (SCN3B), transcript variant 1, mRNA [NM_018400]	0.514428	0.422727
ENST00000534659	LOC643733	ENST00000534659 || LOC643733 || Unknown	0.513585	1.12907
lnc-TMEM234-1:2	lnc-TMEM234-1	lnc-TMEM234-1:2 || lnc-TMEM234-1 || LNCipedia lincRNA (lnc-TMEM234-1), lincRNA [lnc-TMEM234-1:2]	0.513187	1.04276
NM_032866	CGNL1	NM_032866 || CGNL1 || Homo sapiens cingulin-like 1 (CGNL1), transcript variant 2, mRNA [NM_032866]	0.512031	0
NM_001078	VCAM1	NM_001078 || VCAM1 || Homo sapiens vascular cell adhesion molecule 1 (VCAM1), transcript variant 1, mRNA [NM_001078]	0.511655	0
NM_006895	HNMT	NM_006895 || HNMT || Homo sapiens histamine N-methyltransferase (HNMT), transcript variant 1, mRNA [NM_006895]	0.510729	0
NM_004613	TGM2	NM_004613 || TGM2 || Homo sapiens transglutaminase 2 (TGM2), transcript variant 1, mRNA [NM_004613]	0.510446	0
NM_018659	CYTL1	NM_018659 || CYTL1 || Homo sapiens cytokine-like 1 (CYTL1), mRNA [NM_018659]	0.510363	0.339999
ENST00000292907	COX7A1	ENST00000292907 || COX7A1 || cytochrome c oxidase subunit VIIa polypeptide 1 (muscle) [Source:HGNC Symbol;Acc:HGNC:2287] [ENST00000292907]	0.510055	2.03028
NM_001017992	ACTBL2	NM_001017992 || ACTBL2 || Homo sapiens actin, beta-like 2 (ACTBL2), mRNA [NM_001017992]	0.507653	0
NM_000014	A2M	NM_000014 || A2M || Homo sapiens alpha-2-macroglobulin (A2M), mRNA [NM_000014]	0.507291	0
NM_003540	HIST1H4F	NM_003540 || HIST1H4F || Homo sapiens histone cluster 1, H4f (HIST1H4F), mRNA [NM_003540]	0.506316	0.0890281
NM_001040114	MYH11	NM_001040114 || MYH11 || Homo sapiens myosin, heavy chain 11, smooth muscle (MYH11), transcript variant SM1B, mRNA [NM_001040114]	0.505897	0.150883
NM_002118	HLA-DMB	NM_002118 || HLA-DMB || Homo sapiens major histocompatibility complex, class II, DM beta (HLA-DMB), mRNA [NM_002118]	0.504511	0
AK129633	SDIM1	AK129633 || SDIM1 || Homo sapiens cDNA FLJ26122 fis, clone SYN00634. [AK129633]	0.501228	1.00009
NM_148170	CTSC	NM_148170 || CTSC || Homo sapiens cathepsin C (CTSC), transcript variant 2, mRNA [NM_148170]	0.500238	0
NM_001145161	UBE2QL1	NM_001145161 || UBE2QL1 || Homo sapiens ubiquitin-conjugating enzyme E2Q family-like 1 (UBE2QL1), mRNA [NM_001145161]	0.500096	0
NM_001287763	NSG1	NM_001287763 || NSG1 || Homo sapiens neuron specific gene family member 1 (NSG1), transcript variant 3, mRNA [NM_001287763]	0.49959	0
NM_139241	FGD4	NM_139241 || FGD4 || Homo sapiens FYVE, RhoGEF and PH domain containing 4 (FGD4), mRNA [NM_139241]	0.499464	0
NM_003733	OASL	NM_003733 || OASL || Homo sapiens 2'-5'-oligoadenylate synthetase-like (OASL), transcript variant 1, mRNA [NM_003733]	0.499359	0.753658
ENST00000556475	MEG8	ENST00000556475 || MEG8 || maternally expressed 8 (non-protein coding) [Source:HGNC Symbol;Acc:HGNC:14574] [ENST00000556475]	0.499176	0
NM_000693	ALDH1A3	NM_000693 || ALDH1A3 || Homo sapiens aldehyde dehydrogenase 1 family, member A3 (ALDH1A3), transcript variant 1, mRNA [NM_000693]	0.498184	0
NM_016150	ASB2	NM_016150 || ASB2 || Homo sapiens ankyrin repeat and SOCS box containing 2 (ASB2), transcript variant 2, mRNA [NM_016150]	0.498032	0.150883
NR_030732	WFDC21P	NR_030732 || WFDC21P || Homo sapiens WAP four-disulfide core domain 21, pseudogene (WFDC21P), non-coding RNA [NR_030732]	0.49799	0
NM_001286617	MAP3K7CL	NM_001286617 || MAP3K7CL || Homo sapiens MAP3K7 C-terminal like (MAP3K7CL), transcript variant 3, mRNA [NM_001286617]	0.497958	1.29369
NM_005711	EDIL3	NM_005711 || EDIL3 || Homo sapiens EGF-like repeats and discoidin I-like domains 3 (EDIL3), transcript variant 1, mRNA [NM_005711]	0.496942	0.883581
TCONS_l2_00000385	XLOC_l2_000297	TCONS_l2_00000385 || XLOC_l2_000297 || BROAD Institute lincRNA (XLOC_l2_000297), lincRNA [TCONS_l2_00000385]	0.496852	1.61939
NM_003341	UBE2E1	NM_003341 || UBE2E1 || Homo sapiens ubiquitin-conjugating enzyme E2E 1 (UBE2E1), transcript variant 1, mRNA [NM_003341]	0.49554	0
NM_005639	SYT1	NM_005639 || SYT1 || Homo sapiens synaptotagmin I (SYT1), transcript variant 1, mRNA [NM_005639]	0.49256	0
NM_019605	SERTAD4	NM_019605 || SERTAD4 || Homo sapiens SERTA domain containing 4 (SERTAD4), mRNA [NM_019605]	0.491603	0
NM_005725	TSPAN2	NM_005725 || TSPAN2 || Homo sapiens tetraspanin 2 (TSPAN2), mRNA [NM_005725]	0.491042	0.70517
NM_001012279	SOGA3	NM_001012279 || SOGA3 || Homo sapiens SOGA family member 3 (SOGA3), mRNA [NM_001012279]	0.490208	0
NM_004997	MYBPH	NM_004997 || MYBPH || Homo sapiens myosin binding protein H (MYBPH), mRNA [NM_004997]	0.490195	6.24009
NM_020741	KIAA1257	NM_020741 || KIAA1257 || Homo sapiens KIAA1257 (KIAA1257), mRNA [NM_020741]	0.48916	0.145338
A_21_P0014894		A_21_P0014894 || unmapped	0.48909	0.135387
TCONS_l2_00024286	XLOC_l2_012605	TCONS_l2_00024286 || XLOC_l2_012605 || BROAD Institute lincRNA (XLOC_l2_012605), lincRNA [TCONS_l2_00024286]	0.488673	0
NM_006398	UBD	NM_006398 || UBD || Homo sapiens ubiquitin D (UBD), mRNA [NM_006398]	0.488638	1.03923
NM_000396	CTSK	NM_000396 || CTSK || Homo sapiens cathepsin K (CTSK), mRNA [NM_000396]	0.488137	0
NM_001629	ALOX5AP	NM_001629 || ALOX5AP || Homo sapiens arachidonate 5-lipoxygenase-activating protein (ALOX5AP), transcript variant 1, mRNA [NM_001629]	0.487526	0
NM_022147	RTP4	NM_022147 || RTP4 || Homo sapiens receptor (chemosensory) transporter protein 4 (RTP4), mRNA [NM_022147]	0.486297	0
NM_000459	TEK	NM_000459 || TEK || Homo sapiens TEK tyrosine kinase, endothelial (TEK), transcript variant 1, mRNA [NM_000459]	0.485445	0
lnc-AC069257.9.1-4:16	lnc-AC069257.9.1-4	lnc-AC069257.9.1-4:16 || lnc-AC069257.9.1-4 || LNCipedia lincRNA (lnc-AC069257.9.1-4), lincRNA [lnc-AC069257.9.1-4:16]	0.484549	1.93466
NM_015009	PDZRN3	NM_015009 || PDZRN3 || Homo sapiens PDZ domain containing ring finger 3 (PDZRN3), transcript variant 1, mRNA [NM_015009]	0.483716	0
NM_021992	TMSB15A	NM_021992 || TMSB15A || Homo sapiens thymosin beta 15a (TMSB15A), mRNA [NM_021992]	0.482657	0
NR_130106	LAMA3	NR_130106 || LAMA3 || Homo sapiens laminin, alpha 3 (LAMA3), transcript variant 6, non-coding RNA [NR_130106]	0.482532	3.89407
ENST00000379526		ENST00000379526 || || Q5VXX5_HUMAN (Q5VXX5) OTTHUMP00000030153, complete [THC2696515]	0.480877	8.06703
NM_173354	SIK1	NM_173354 || SIK1 || Homo sapiens salt-inducible kinase 1 (SIK1), mRNA [NM_173354]	0.479957	0
NM_203422	LRRN4CL	NM_203422 || LRRN4CL || Homo sapiens LRRN4 C-terminal like (LRRN4CL), mRNA [NM_203422]	0.478671	0
NM_198389	PDPN	NM_198389 || PDPN || Homo sapiens podoplanin (PDPN), transcript variant 2, mRNA [NM_198389]	0.477542	0
NM_003734	AOC3	NM_003734 || AOC3 || Homo sapiens amine oxidase, copper containing 3 (AOC3), transcript variant 1, mRNA [NM_003734]	0.477373	0
NM_003783	B3GALT2	NM_003783 || B3GALT2 || Homo sapiens UDP-Gal:betaGlcNAc beta 1,3-galactosyltransferase, polypeptide 2 (B3GALT2), mRNA [NM_003783]	0.47672	0
NM_130782	RGS18	NM_130782 || RGS18 || Homo sapiens regulator of G-protein signaling 18 (RGS18), mRNA [NM_130782]	0.476243	0
NM_005410	SEPP1	NM_005410 || SEPP1 || Homo sapiens selenoprotein P, plasma, 1 (SEPP1), transcript variant 1, mRNA [NM_005410]	0.475467	0
NM_000669	ADH1C	NM_000669 || ADH1C || Homo sapiens alcohol dehydrogenase 1C (class I), gamma polypeptide (ADH1C), mRNA [NM_000669]	0.475424	0
lnc-NKD2-3:7	lnc-NKD2-3	lnc-NKD2-3:7 || lnc-NKD2-3 || LNCipedia lincRNA (lnc-NKD2-3), lincRNA [lnc-NKD2-3:7]	0.473391	0.137619
NM_001008394	EID3	NM_001008394 || EID3 || Homo sapiens EP300 interacting inhibitor of differentiation 3 (EID3), mRNA [NM_001008394]	0.470134	0
NM_133455	EMID1	NM_133455 || EMID1 || Homo sapiens EMI domain containing 1 (EMID1), transcript variant 1, mRNA [NM_133455]	0.469804	0
NM_030906	STK33	NM_030906 || STK33 || Homo sapiens serine/threonine kinase 33 (STK33), transcript variant 1, mRNA [NM_030906]	0.469678	0
NM_153756	FNDC5	NM_153756 || FNDC5 || Homo sapiens fibronectin type III domain containing 5 (FNDC5), transcript variant 2, mRNA [NM_153756]	0.469359	0.405613
lnc-SLC12A7-1:2	lnc-SLC12A7-1	lnc-SLC12A7-1:2 || lnc-SLC12A7-1 || LNCipedia lincRNA (lnc-SLC12A7-1), lincRNA [lnc-SLC12A7-1:2]	0.468362	2.0077
NM_152753	SCUBE3	NM_152753 || SCUBE3 || Homo sapiens signal peptide, CUB domain, EGF-like 3 (SCUBE3), transcript variant 1, mRNA [NM_152753]	0.468002	1.00009
TCONS_l2_00018911	XLOC_l2_009929	TCONS_l2_00018911 || XLOC_l2_009929 || BROAD Institute lincRNA (XLOC_l2_009929), lincRNA [TCONS_l2_00018911]	0.467942	0
NM_000492	CFTR	NM_000492 || CFTR || Homo sapiens cystic fibrosis transmembrane conductance regulator (ATP-binding cassette sub-family C, member 7) (CFTR), mRNA [NM_000492]	0.467703	0.491109
lnc-FAM133B-1:1	lnc-FAM133B-1	lnc-FAM133B-1:1 || lnc-FAM133B-1 || Homo sapiens cDNA FLJ16364 fis, clone THYMU2032976. [AK131345]	0.467292	2.40025
NR_026998	LOC91450	NR_026998 || LOC91450 || Homo sapiens uncharacterized LOC91450 (LOC91450), long non-coding RNA [NR_026998]	0.467143	0
NR_002968	SNORA34	NR_002968 || SNORA34 || Homo sapiens small nucleolar RNA, H/ACA box 34 (SNORA34), small nucleolar RNA [NR_002968]	0.46656	2.50909
NM_005491	MAMLD1	NM_005491 || MAMLD1 || Homo sapiens mastermind-like domain containing 1 (MAMLD1), transcript variant 2, mRNA [NM_005491]	0.465292	0
ENST00000269197	ASXL3	ENST00000269197 || ASXL3 || additional sex combs like transcriptional regulator 3 [Source:HGNC Symbol;Acc:HGNC:29357] [ENST00000269197]	0.465146	0.148497
NM_014020	TMEM176B	NM_014020 || TMEM176B || Homo sapiens transmembrane protein 176B (TMEM176B), transcript variant 1, mRNA [NM_014020]	0.464312	0
lnc-RPS27L-1:1	lnc-RPS27L-1	lnc-RPS27L-1:1 || lnc-RPS27L-1 || BX373851 Homo sapiens PLACENTA COT 25-NORMALIZED Homo sapiens cDNA clone CS0DI086YN04 3-PRIME, mRNA sequence [BX373851]	0.463758	0.256888
NM_001615	ACTG2	NM_001615 || ACTG2 || Homo sapiens actin, gamma 2, smooth muscle, enteric (ACTG2), transcript variant 1, mRNA [NM_001615]	0.461686	0
NM_018487	TMEM176A	NM_018487 || TMEM176A || Homo sapiens transmembrane protein 176A (TMEM176A), mRNA [NM_018487]	0.460326	0
NM_018245	OGDHL	NM_018245 || OGDHL || Homo sapiens oxoglutarate dehydrogenase-like (OGDHL), transcript variant 1, mRNA [NM_018245]	0.457783	0
NM_001200	BMP2	NM_001200 || BMP2 || Homo sapiens bone morphogenetic protein 2 (BMP2), mRNA [NM_001200]	0.457203	0
NM_001114123	ELK1	NM_001114123 || ELK1 || Homo sapiens ELK1, member of ETS oncogene family (ELK1), transcript variant 1, mRNA [NM_001114123]	0.456877	9.23036
NM_000399	EGR2	NM_000399 || EGR2 || Homo sapiens early growth response 2 (EGR2), transcript variant 1, mRNA [NM_000399]	0.454928	0
NR_110392	LINC01280	NR_110392 || LINC01280 || Homo sapiens long intergenic non-protein coding RNA 1280 (LINC01280), long non-coding RNA [NR_110392]	0.453095	1.1905
NM_130386	COLEC12	NM_130386 || COLEC12 || Homo sapiens collectin sub-family member 12 (COLEC12), mRNA [NM_130386]	0.451534	0
NM_024553	CCDC132	NM_024553 || CCDC132 || Homo sapiens coiled-coil domain containing 132 (CCDC132), transcript variant 2, mRNA [NM_024553]	0.450143	0
NM_005330	HBE1	NM_005330 || HBE1 || Homo sapiens hemoglobin, epsilon 1 (HBE1), mRNA [NM_005330]	0.447919	0.631073
NM_001004439	ITGA11	NM_001004439 || ITGA11 || Homo sapiens integrin, alpha 11 (ITGA11), mRNA [NM_001004439]	0.447586	0
NR_110434	RTCA-AS1	NR_110434 || RTCA-AS1 || Homo sapiens RTCA antisense RNA 1 (RTCA-AS1), transcript variant 1, long non-coding RNA [NR_110434]	0.447162	1.43927
ENST00000606279		ENST00000606279 || || Unknown	0.4464	0
ENST00000360835	SCUBE1	ENST00000360835 || SCUBE1 || signal peptide, CUB domain, EGF-like 1 [Source:HGNC Symbol;Acc:HGNC:13441] [ENST00000360835]	0.445583	0
NM_000418	IL4R	NM_000418 || IL4R || Homo sapiens interleukin 4 receptor (IL4R), transcript variant 1, mRNA [NM_000418]	0.444879	0
NM_000576	IL1B	NM_000576 || IL1B || Homo sapiens interleukin 1, beta (IL1B), mRNA [NM_000576]	0.444848	0
lnc-MINA-3:2	lnc-MINA-3	lnc-MINA-3:2 || lnc-MINA-3 || LNCipedia lincRNA (lnc-MINA-3), lincRNA [lnc-MINA-3:2]	0.44225	0
NM_004120	GBP2	NM_004120 || GBP2 || Homo sapiens guanylate binding protein 2, interferon-inducible (GBP2), mRNA [NM_004120]	0.441412	0
NM_001100165	PHACTR2	NM_001100165 || PHACTR2 || Homo sapiens phosphatase and actin regulator 2 (PHACTR2), transcript variant 2, mRNA [NM_001100165]	0.441386	0
NM_032622	LNX1	NM_032622 || LNX1 || Homo sapiens ligand of numb-protein X 1, E3 ubiquitin protein ligase (LNX1), transcript variant 2, mRNA [NM_032622]	0.43887	0
NM_017784	OSBPL10	NM_017784 || OSBPL10 || Homo sapiens oxysterol binding protein-like 10 (OSBPL10), transcript variant 1, mRNA [NM_017784]	0.438084	0
NM_002658	PLAU	NM_002658 || PLAU || Homo sapiens plasminogen activator, urokinase (PLAU), transcript variant 1, mRNA [NM_002658]	0.437823	0
AW968932		AW968932 || || EST381008 MAGE resequences, MAGJ Homo sapiens cDNA, mRNA sequence [AW968932]	0.437253	0
NM_001463	FRZB	NM_001463 || FRZB || Homo sapiens frizzled-related protein (FRZB), mRNA [NM_001463]	0.435819	0
NM_005883	APC2	NM_005883 || APC2 || Homo sapiens adenomatosis polyposis coli 2 (APC2), mRNA [NM_005883]	0.434673	0
NM_001613	ACTA2	NM_001613 || ACTA2 || Homo sapiens actin, alpha 2, smooth muscle, aorta (ACTA2), transcript variant 2, mRNA [NM_001613]	0.434559	0
NM_001031849	MASP1	NM_001031849 || MASP1 || Homo sapiens mannan-binding lectin serine peptidase 1 (C4/C2 activating component of Ra-reactive factor) (MASP1), transcript variant 3, mRNA [NM_001031849]	0.434107	0
NM_182920	ADAMTS9	NM_182920 || ADAMTS9 || Homo sapiens ADAM metallopeptidase with thrombospondin type 1 motif, 9 (ADAMTS9), mRNA [NM_182920]	0.433624	0
NM_020663	RHOJ	NM_020663 || RHOJ || Homo sapiens ras homolog family member J (RHOJ), mRNA [NM_020663]	0.433375	0
NM_001042575	TMPRSS7	NM_001042575 || TMPRSS7 || Homo sapiens transmembrane protease, serine 7 (TMPRSS7), transcript variant 1, mRNA [NM_001042575]	0.429303	4.55297
NM_002889	RARRES2	NM_002889 || RARRES2 || Homo sapiens retinoic acid receptor responder (tazarotene induced) 2 (RARRES2), mRNA [NM_002889]	0.428567	0
NM_152588	TMTC2	NM_152588 || TMTC2 || Homo sapiens transmembrane and tetratricopeptide repeat containing 2 (TMTC2), mRNA [NM_152588]	0.425543	0
NM_144966	FREM1	NM_144966 || FREM1 || Homo sapiens FRAS1 related extracellular matrix 1 (FREM1), transcript variant 1, mRNA [NM_144966]	0.42101	0
NM_001018005	TPM1	NM_001018005 || TPM1 || Homo sapiens tropomyosin 1 (alpha) (TPM1), transcript variant Tpm1.1, mRNA [NM_001018005]	0.420712	0
NM_000600	IL6	NM_000600 || IL6 || Homo sapiens interleukin 6 (IL6), mRNA [NM_000600]	0.417734	0
NM_000724	CACNB2	NM_000724 || CACNB2 || Homo sapiens calcium channel, voltage-dependent, beta 2 subunit (CACNB2), transcript variant 1, mRNA [NM_000724]	0.410275	0.135387
NM_001101676	SAMD12	NM_001101676 || SAMD12 || Homo sapiens sterile alpha motif domain containing 12 (SAMD12), transcript variant 1, mRNA [NM_001101676]	0.407801	0
NM_002153	HSD17B2	NM_002153 || HSD17B2 || Homo sapiens hydroxysteroid (17-beta) dehydrogenase 2 (HSD17B2), mRNA [NM_002153]	0.407235	0
NM_001045556	SLA	NM_001045556 || SLA || Homo sapiens Src-like-adaptor (SLA), transcript variant 1, mRNA [NM_001045556]	0.406876	0
NM_001143836	NOX4	NM_001143836 || NOX4 || Homo sapiens NADPH oxidase 4 (NOX4), transcript variant NOX4B, mRNA [NM_001143836]	0.405294	3.94553
NM_000667	ADH1A	NM_000667 || ADH1A || Homo sapiens alcohol dehydrogenase 1A (class I), alpha polypeptide (ADH1A), mRNA [NM_000667]	0.402808	0.23968
NM_001018004	TPM1	NM_001018004 || TPM1 || Homo sapiens tropomyosin 1 (alpha) (TPM1), transcript variant Tpm1.6, mRNA [NM_001018004]	0.402768	0
lnc-RAD23B-11:1	lnc-RAD23B-11	lnc-RAD23B-11:1 || lnc-RAD23B-11 || LNCipedia lincRNA (lnc-RAD23B-11), lincRNA [lnc-RAD23B-11:1]	0.400259	4.1832
NM_021968	HIST1H4J	NM_021968 || HIST1H4J || Homo sapiens histone cluster 1, H4j (HIST1H4J), mRNA [NM_021968]	0.40022	0
NM_001080505	SHISA3	NM_001080505 || SHISA3 || Homo sapiens shisa family member 3 (SHISA3), mRNA [NM_001080505]	0.399554	0
NM_002543	OLR1	NM_002543 || OLR1 || Homo sapiens oxidized low density lipoprotein (lectin-like) receptor 1 (OLR1), transcript variant 1, mRNA [NM_002543]	0.396068	0
NM_002575	SERPINB2	NM_002575 || SERPINB2 || Homo sapiens serpin peptidase inhibitor, clade B (ovalbumin), member 2 (SERPINB2), transcript variant 2, mRNA [NM_002575]	0.395741	0
ENST00000376332	CHRDL2	ENST00000376332 || CHRDL2 || chordin-like 2 [Source:HGNC Symbol;Acc:HGNC:24168] [ENST00000376332]	0.395076	0
NR_075093	SOX2-OT	NR_075093 || SOX2-OT || Homo sapiens SOX2 overlapping transcript (SOX2-OT), transcript variant 3, long non-coding RNA [NR_075093]	0.39443	0
lnc-UMODL1-1:1	lnc-UMODL1-1	lnc-UMODL1-1:1 || lnc-UMODL1-1 || LNCipedia lincRNA (lnc-UMODL1-1), lincRNA [lnc-UMODL1-1:1]	0.393798	1.04276
NM_002193	INHBB	NM_002193 || INHBB || Homo sapiens inhibin, beta B (INHBB), mRNA [NM_002193]	0.392973	0
NM_004469	FIGF	NM_004469 || FIGF || Homo sapiens c-fos induced growth factor (vascular endothelial growth factor D) (FIGF), mRNA [NM_004469]	0.391196	0.331987
NM_006108	SPON1	NM_006108 || SPON1 || Homo sapiens spondin 1, extracellular matrix protein (SPON1), mRNA [NM_006108]	0.38762	0
NM_001999	FBN2	NM_001999 || FBN2 || Homo sapiens fibrillin 2 (FBN2), mRNA [NM_001999]	0.386366	0
NM_006343	MERTK	NM_006343 || MERTK || Homo sapiens MER proto-oncogene, tyrosine kinase (MERTK), mRNA [NM_006343]	0.383586	0
lnc-FAM55B-1:1	lnc-FAM55B-1	lnc-FAM55B-1:1 || lnc-FAM55B-1 || LNCipedia lincRNA (lnc-FAM55B-1), lincRNA [lnc-FAM55B-1:1]	0.383182	0
NM_000559	HBG1	NM_000559 || HBG1 || Homo sapiens hemoglobin, gamma A (HBG1), mRNA [NM_000559]	0.380633	0
NR_024337	SERTAD4-AS1	NR_024337 || SERTAD4-AS1 || Homo sapiens SERTAD4 antisense RNA 1 (SERTAD4-AS1), long non-coding RNA [NR_024337]	0.380357	0
ENST00000426575		ENST00000426575 || || Unknown	0.376459	0
NM_000519	HBD	NM_000519 || HBD || Homo sapiens hemoglobin, delta (HBD), mRNA [NM_000519]	0.376404	0
NM_003991	EDNRB	NM_003991 || EDNRB || Homo sapiens endothelin receptor type B (EDNRB), transcript variant 2, mRNA [NM_003991]	0.37555	0
lnc-PRICKLE2-3:1	lnc-PRICKLE2-3	lnc-PRICKLE2-3:1 || lnc-PRICKLE2-3 || LNCipedia lincRNA (lnc-PRICKLE2-3), lincRNA [lnc-PRICKLE2-3:1]	0.37462	0
NM_130385	MRVI1	NM_130385 || MRVI1 || Homo sapiens murine retrovirus integration site 1 homolog (MRVI1), transcript variant 2, mRNA [NM_130385]	0.374351	0
NM_001301043	CADM1	NM_001301043 || CADM1 || Homo sapiens cell adhesion molecule 1 (CADM1), transcript variant 3, mRNA [NM_001301043]	0.373717	0
NM_020225	STOX2	NM_020225 || STOX2 || Homo sapiens storkhead box 2 (STOX2), mRNA [NM_020225]	0.369738	0
NM_001511	CXCL1	NM_001511 || CXCL1 || Homo sapiens chemokine (C-X-C motif) ligand 1 (melanoma growth stimulating activity, alpha) (CXCL1), transcript variant 1, mRNA [NM_001511]	0.364005	0
NM_023940	RASL11B	NM_023940 || RASL11B || Homo sapiens RAS-like, family 11, member B (RASL11B), mRNA [NM_023940]	0.363769	0
ENST00000572007		ENST00000572007 || || Unknown	0.355657	9.61574
AK098579	LOC100509780	AK098579 || LOC100509780 || Homo sapiens cDNA FLJ25713 fis, clone TST05089. [AK098579]	0.346016	5.99377
NM_002612	PDK4	NM_002612 || PDK4 || Homo sapiens pyruvate dehydrogenase kinase, isozyme 4 (PDK4), mRNA [NM_002612]	0.342802	0
NM_173491	LSM11	NM_173491 || LSM11 || Homo sapiens LSM11, U7 small nuclear RNA associated (LSM11), mRNA [NM_173491]	0.339282	7.58603
NM_133477	SYNPO2	NM_133477 || SYNPO2 || Homo sapiens synaptopodin 2 (SYNPO2), transcript variant 1, mRNA [NM_133477]	0.335885	0
lnc-SDIM1-3:7	lnc-SDIM1-3	lnc-SDIM1-3:7 || lnc-SDIM1-3 || LNCipedia lincRNA (lnc-SDIM1-3), lincRNA [lnc-SDIM1-3:7]	0.330238	0
NM_000104	CYP1B1	NM_000104 || CYP1B1 || Homo sapiens cytochrome P450, family 1, subfamily B, polypeptide 1 (CYP1B1), mRNA [NM_000104]	0.32197	0
NM_001142287	SEMA4D	NM_001142287 || SEMA4D || Homo sapiens sema domain, immunoglobulin domain (Ig), transmembrane domain (TM) and short cytoplasmic domain, (semaphorin) 4D (SEMA4D), transcript variant 2, mRNA [NM_001142287]	0.319122	0
NM_014737	RASSF2	NM_014737 || RASSF2 || Homo sapiens Ras association (RalGDS/AF-6) domain family member 2 (RASSF2), transcript variant 1, mRNA [NM_014737]	0.317997	0
NM_000238	KCNH2	NM_000238 || KCNH2 || Homo sapiens potassium voltage-gated channel, subfamily H (eag-related), member 2 (KCNH2), transcript variant 1, mRNA [NM_000238]	0.31784	0
NM_001040113	MYH11	NM_001040113 || MYH11 || Homo sapiens myosin, heavy chain 11, smooth muscle (MYH11), transcript variant SM2B, mRNA [NM_001040113]	0.310109	0.172339
NR_125739	CEBPB-AS1	NR_125739 || CEBPB-AS1 || Homo sapiens CEBPB antisense RNA 1 (CEBPB-AS1), long non-coding RNA [NR_125739]	0.308964	9.91133
NM_007037	ADAMTS8	NM_007037 || ADAMTS8 || Homo sapiens ADAM metallopeptidase with thrombospondin type 1 motif, 8 (ADAMTS8), mRNA [NM_007037]	0.307459	0
NM_021197	WFDC1	NM_021197 || WFDC1 || Homo sapiens WAP four-disulfide core domain 1 (WFDC1), transcript variant 1, mRNA [NM_021197]	0.291219	0
NM_002522	NPTX1	NM_002522 || NPTX1 || Homo sapiens neuronal pentraxin I (NPTX1), mRNA [NM_002522]	0.284089	0
lnc-UMODL1-1:2	lnc-UMODL1-1	lnc-UMODL1-1:2 || lnc-UMODL1-1 || LNCipedia lincRNA (lnc-UMODL1-1), lincRNA [lnc-UMODL1-1:2]	0.275677	0
AK124222	LOC100131043	AK124222 || LOC100131043 || Homo sapiens cDNA FLJ42228 fis, clone THYMU2041252. [AK124222]	0.257439	8.4009
[truncated: 9 more rows]

## Sheet: Gr-4C-CB, toxic
NCBI RefSeq	Gene Symbol	NBCI RefSeq || Gene Symbol || Gene Description (total # of significant genes: 3333; 1546 up, 1787 down)	Normalized Fold (Unlogged)	q-value (%)
[truncated: 3,333 more rows]

[truncated: 5 more sheets: Gr-4A-CD, toxic, Gr-4A-Asinex, toxic, O10-V, non-toxic, O10-CB, non-toxic, Rapamycin]
