# Supplementary material
Source: publisher figshare collection journal article supplement (https://gsajournals.figshare.com/articles/dataset/_/11292143)
Supplement: Supplementary file 2 [file 1]

Archive with 12 entries (12 files):
- Table S9 Potential targets for small molecules.xlsx
- Table S8 Effects of small molecules on C. elegans’ lifespan and H2O2-resistance.xlsx
- Table S7 Potential mTOR inhibition by certain small molecules.xlsx
- Table S6 Summary of pathway analysis results for RNA-seq of cells treated with small molecules.xlsx
- Table S5B List of significant genes identified by microarray for cells treated with others.xlsx
- Table S5A List of significant genes identified by RNA-seq for cells treated with Gr-4D.xlsx
- Table S4 Effects of small molecules on ATP level and DNA damage-associated markers.xlsx
- Table S3 Protection of WI-38 cells from the heavy metal CdCl2 by small molecules.xlsx
- Table S2 Cell death-imaging analysis of 32 core-set small molecules.xlsx
- Table S1 Summary of 61 top hits that passed the initial selection criteria.xlsx
- Small molecule screen manuscript Supplemental Figure S1 to S10 (revised)- Zhang, Kenyon.pdf
- Small molecule screen manuscript supplemental text (revised) v4 - Zhang, Kenyon.docx
