# Supplementary material
Source: publisher figshare collection journal article supplement (https://gsajournals.figshare.com/articles/dataset/_/11292143)
Supplement: Supplementary file 2 [file 1 › Table S9 Potential targets for small molecules.xlsx]

## Sheet: Table S9, Potential targets
Table S9.Potential targets for small molecules
By PubChem query - #Human Protein Targets (active, non-redundant)/ #Total Protein Targets (active, non-redundant)/ #Total Potential Protein Targets (non-redundant)/ #Identified in Total BioAssays
36/40/395/803		12/19/375/736	23/24/238/553	40/44/401/950	3/4/19/119	43/51/400/806	12/17/305/606	1/1/1/2		9/15/306/574
Gr-4D, non-toxic		Gr-1F	Gr-3A = AC1LEORR	Gr-3B	Gr-3C	Gr-7C	O13	O18		O6 (PAIN, non-toxic)
ABHD5		CASP3	APLNR	ADRB2	GAPDH	ABHD5	CASP3	JAK2		ADAM10
ATXN2		CFTR	BARD1	AGTR1	NFKBIA	ADRB2	DRD2			ADAM17
BARD1		FXN	BAZ2B	APLNR	RELA	ATXN2	GMNN			ATXN2
BRCA1		GMNN	BRCA1	ARNT		BARD1	HCRTR1			GLP1R
CFTR		IDH1	CCR6	BARD1		BRCA1	NR5A1			IDH1
CHRM1		IL1B	DRD3	BRCA1		CFTR	NR5A2			IL1B
CHRM4		JAK2	GMNN	CCR6		CHRM4	SENP6			KCNE1
CYP2C9		SENP6	GRK2	CFTR		CYP2C19	SENP8			KCNQ1
CYP3A4		SENP7	IL1B	CHRM4		EPAS1	SSP1			NTSR1
DRD3		SENP8	MDM2	CXCR6		GMNN	TDP1
EPAS1		STAT1	MDM4	DRD3		GPR183	TIM10
GMNN		TDP1	NFE2L2	EPAS1		HIF1A	TIM23
GPR183			NFKBIA	GOPC		HNF4A
HIF1A			NOD1	HIF1A		IDH1
HNF4A			NOD2	HTT		IL1B
HOXA9			OPRK1	IL1B		KCNJ1
HTT			RBBP8	MAP1LC3A		MDM2
IDH1			RELA	MDM2		MDM4
IL1B			SIX1	MDM4		MITF
LMP1			SMAD3	MITF		NCOA1
MAPT			TDP1	MSRA		NCOA2
MDM2			TIM10	NFE2L2		NCOA3
MDM4			TIM23	NOD1		NFE2L2
MITF				NOD2		NOD1
NFKB1				NR2E3		NOD2
NOD1				OPRD1		NPBWR1
NOD2				OPRK1		NPSR1
PLIN5				OPRM1		NPY1R
RELA				PRNP		NPY2R
SMAD3				RIPK2		NR2E3
TDP1				S1PR1		NR2F2
TIM10				S1PR4		NR5A1
TIM23				SIX1		NR5A2
TNF				SLC12A5		PLIN5
TNFRSF10B				SMAD3		RIPK2
TUBB				TACC3		S1PR1
				TARDBP		S1PR2
				TDP1		S1PR4
				TLR9		TDP1
				TNF		TIM10
						TIM23
						TNF
						VDR
Target of 2 different small molecules (23): ABHD5, ADRB2, APLNR, CASP3, CCR6, GPR183, HNF4A, HTT, JAK2, NCOA3, NFKBIA, NR2E3, NR5A1, NR5A2,
OPRD1, OPRK1, OPRM1, PLIN5, RIPK2, SENP6, SENP8, SIX1, S1PR1, S1PR4
Target of 3 different small molecules (10): ATXN2, CHRM4, DRD3, EPAS1, HIF1A, MITF, NFE2L2/NRF2, RELA, SMAD3, TNF
Target of 4 different small molecules (7): BARD1, BRCA1, IDH1, MDM2, MDM4, NOD1, NOD2, TIM10, TIM23
Target of 5 or more different small molecules (4): CFTR, GMNN, IL1B, TDP1
Non-cell-toxic:
Gr-4D		https://pubchem.ncbi.nlm.nih.gov/compound/5760298?from=summary
Cell-toxic:
Gr-1F		https://pubchem.ncbi.nlm.nih.gov/compound/756083?from=summary
Gr-3A		https://pubchem.ncbi.nlm.nih.gov/compound/739449?from=summary
Gr-3B		https://pubchem.ncbi.nlm.nih.gov/compound/82533?from=summary
Gr-3C		https://pubchem.ncbi.nlm.nih.gov/compound/1070159?from=summary
Gr-7C		https://pubchem.ncbi.nlm.nih.gov/compound/5767688?from=summary
O13		https://pubchem.ncbi.nlm.nih.gov/compound/762594?from=summary
O18		https://pubchem.ncbi.nlm.nih.gov/compound/5720181?from=summary
Non-cell-toxic, yet a PAIN:
O6		https://pubchem.ncbi.nlm.nih.gov/compound/15999028?from=summary
Supplemental Table 9. Potential targets for small molecules identified in other assays. Shown are potential (direct or indirect) human protein targets for 9 small molecules that were identified and reported previously in other screens. 9 of our small-molecule hits scored positively (from PubChem, https://www.ncbi.nlm.nih.gov/pccompound). 1st tab: list of potential (direct or indirect) human prote…

## Sheet: Gr-4D, non-toxic
acvalue	activity	cid	sid	aid	aidname	targetname	targeturl
	Active	5760298	17408031	602281	Luminescence-based biochemical primary high throughput screening assay to identify inhibitors of the interaction of the lipase co-activator protein, abhydrolase domain containing 5 (ABHD5) with perilipin-5 (MLDP; PLIN5)	ABHD5	https://pubchem.ncbi.nlm.nih.gov/target/gene/ABHD5
	Active	5760298	17408031	651612	Luminescence-based biochemical high throughput confirmation assay for inhibitors of the interaction of the lipase co-activator protein, abhydrolase domain containing 5 (ABHD5) with perilipin-5 (MLDP; PLIN5)	ABHD5	https://pubchem.ncbi.nlm.nih.gov/target/gene/ABHD5
39.8107	Active	5760298	22410113	651635	qHTS for Inhibitors of ATXN expression	ATXN2	https://pubchem.ncbi.nlm.nih.gov/target/gene/ATXN2
	Active	5760298	22410113	504668	Single concentration confirmation of inhibitors of Mdm2/MdmX interaction using a Brca1/Bard1 BiLC Counterscreen assay.	BARD1	https://pubchem.ncbi.nlm.nih.gov/target/gene/BARD1
	Active	5760298	22410113	504668	Single concentration confirmation of inhibitors of Mdm2/MdmX interaction using a Brca1/Bard1 BiLC Counterscreen assay.	BRCA1	https://pubchem.ncbi.nlm.nih.gov/target/gene/BRCA1
	Active	5760298	17408031	588850	uHTS identification of cystic fibrosis induced NFkb Inhibitors in a fluoresence assay	CFTR	https://pubchem.ncbi.nlm.nih.gov/target/gene/CFTR
	Active	5760298	17408031	588852	Fluorescence-based cell-based primary high throughput screening assay to identify antagonists of the human M1 muscarinic receptor (CHRM1)	CHRM1	https://pubchem.ncbi.nlm.nih.gov/target/gene/CHRM1
	Active	5760298	17408031	624125	Fluorescence-based cell-based primary high throughput screening assay to identify antagonists of the human cholinergic receptor, muscarinic 4 (CHRM4)	CHRM4	https://pubchem.ncbi.nlm.nih.gov/target/gene/CHRM4
	Active	5760298	17408031	1851	Cytochrome panel assay with activity outcomes	CYP2C9	https://pubchem.ncbi.nlm.nih.gov/target/gene/CYP2C9
	Active	5760298	17408031	1851	Cytochrome panel assay with activity outcomes	CYP3A4	https://pubchem.ncbi.nlm.nih.gov/target/gene/CYP3A4
	Active	5760298	22410113	652054	qHTS of D3 Dopamine Receptor Antagonist: qHTS	DRD3	https://pubchem.ncbi.nlm.nih.gov/target/gene/DRD3
	Active	5760298	17408031	624352	uHTS identification of HIF-2a Inhibitors in a luminesence assay	EPAS1	https://pubchem.ncbi.nlm.nih.gov/target/gene/EPAS1
	Active	5760298	17408031	651580	Single concentration confirmation of uHTS identification of HIF-2a Inhibitors in a luminesence assay	EPAS1	https://pubchem.ncbi.nlm.nih.gov/target/gene/EPAS1
5.1735	Active	5760298	22410113	624297	A quantitative high throughput screen for small molecules that induce DNA re-replication in SW480 colon adenocarcinoma cells.	GMNN	https://pubchem.ncbi.nlm.nih.gov/target/gene/GMNN
6.5131	Active	5760298	22410113	624296	A quantitative high throughput screen for small molecules that induce DNA re-replication in MCF 10a normal breast cells.	GMNN	https://pubchem.ncbi.nlm.nih.gov/target/gene/GMNN
	Active	5760298	17408031	651636	uHTS identification of small molecule antagonists of the EBI2 receptor via a luminescent beta-arrestin assay	GPR183	https://pubchem.ncbi.nlm.nih.gov/target/gene/GPR183
	Active	5760298	17408031	651589	Single concentration confirmation of HIF-2a Inhibitors in a HIF-1a counterscreen in human MiAPaCa-2 Cells luciferase reporter assay	HIF1A	https://pubchem.ncbi.nlm.nih.gov/target/gene/HIF1A
	Active	5760298	17408031	651674	Counterscreen for inhibitors of the interaction of the lipase co-activator protein, abhydrolase domain containing 5 (ABHD5) with perilipin-5 (MLDP; PLIN5): Luminescence-based biochemical high throughput assay to identify inhibitors of Hepatocyte nuclear f	HNF4A	https://pubchem.ncbi.nlm.nih.gov/target/gene/HNF4A
	Active	5760298	17408031	624256	HTS to identify compounds that promote myeloid differentiation with MLPCN compound set	HOXA9	https://pubchem.ncbi.nlm.nih.gov/target/gene/HOXA9
5.0119	Active	5760298	17408031	1688	qHTS Multiplex Assay to Identify Dual Action Probes in a Cell Model of Huntington: Aggregate Formation (GFP)	HTT	https://pubchem.ncbi.nlm.nih.gov/target/gene/HTT
2.9093	Active	5760298	22410113	686970	qHTS for induction of synthetic lethality in tumor cells producing 2HG: qHTS for the HT-1080-NT fibrosarcoma cell line	IDH1	https://pubchem.ncbi.nlm.nih.gov/target/gene/IDH1
	Active	5760298	22410113	743279	qHTS for Inhibitors of Inflammasome Signaling: IL-1-beta AlphaLISA Primary Screen	IL1B	https://pubchem.ncbi.nlm.nih.gov/target/gene/IL1B
	Active	5760298	17408031	504558	Inhibitors of Epstein-Barr LMP1 inducible NF-kappaB luciferase reporter Measured in Cell-Based System Using Plate Reader - 2122-01_Inhibitor_SinglePoint_HTS_Activity	LMP1	https://pubchem.ncbi.nlm.nih.gov/target/gene/LMP1
39.8107	Active	5760298	17408031	1460	qHTS for Inhibitors of Tau Fibril Formation, Thioflavin T Binding	MAPT	https://pubchem.ncbi.nlm.nih.gov/target/gene/MAPT
	Active	5760298	22410113	485346	uHTS for identification of Inhibitors of Mdm2/MdmX interaction in luminescent format.	MDM2	https://pubchem.ncbi.nlm.nih.gov/target/gene/MDM2
	Active	5760298	22410113	489028	Single concentration confirmation of uHTS for Inhibitors of Mdm2/MdmX interaction in luminescent format.	MDM2	https://pubchem.ncbi.nlm.nih.gov/target/gene/MDM2
	Active	5760298	22410113	504601	Single concentration confirmation of uHTS for Inhibitors of Mdm2/MdmX interaction in luminescent format - Set 2	MDM2	https://pubchem.ncbi.nlm.nih.gov/target/gene/MDM2
	Active	5760298	22410113	485346	uHTS for identification of Inhibitors of Mdm2/MdmX interaction in luminescent format.	MDM4	https://pubchem.ncbi.nlm.nih.gov/target/gene/MDM4
	Active	5760298	22410113	489028	Single concentration confirmation of uHTS for Inhibitors of Mdm2/MdmX interaction in luminescent format.	MDM4	https://pubchem.ncbi.nlm.nih.gov/target/gene/MDM4
	Active	5760298	22410113	504601	Single concentration confirmation of uHTS for Inhibitors of Mdm2/MdmX interaction in luminescent format - Set 2	MDM4	https://pubchem.ncbi.nlm.nih.gov/target/gene/MDM4
	Active	5760298	17408031	488899	MITF Measured in Cell-Based System Using Plate Reader - 2084-01_Inhibitor_SinglePoint_HTS_Activity	MITF	https://pubchem.ncbi.nlm.nih.gov/target/gene/MITF
	Active	5760298	17408031	1239	High Throughput Screen to Identify Compounds that increase expression of NF-kB in Human Neuronal Cells - Primary Screen	NFKB1	https://pubchem.ncbi.nlm.nih.gov/target/gene/NFKB1
	Active	5760298	17408031	1578	uHTS luminescence assay for the identification of compounds that inhibit NOD1	NOD1	https://pubchem.ncbi.nlm.nih.gov/target/gene/NOD1
	Active	5760298	17408031	1566	uHTS luminescence assay for the identification of compounds that inhibit NOD2	NOD2	https://pubchem.ncbi.nlm.nih.gov/target/gene/NOD2
7.045	Active	5760298	17408031	540268	Anti-Malarial Hsp90 Inhibitors Measured in Microorganism System Using Plate Reader - 2121-01_Inhibitor_Dose_CherryPick_Activity	PF14_0417	https://pubchem.ncbi.nlm.nih.gov/target/gene/PF14_0417
	Active	5760298	17408031	504621	Anti-Malarial Hsp90 Inhibitors Measured in Microorganism System Using Plate Reader - 2121-01_Inhibitor_SinglePoint_HTS_Activity_Set2	PF14_0417	https://pubchem.ncbi.nlm.nih.gov/target/gene/PF14_0417
	Active	5760298	17408031	602281	Luminescence-based biochemical primary high throughput screening assay to identify inhibitors of the interaction of the lipase co-activator protein, abhydrolase domain containing 5 (ABHD5) with perilipin-5 (MLDP; PLIN5)	PLIN5	https://pubchem.ncbi.nlm.nih.gov/target/gene/PLIN5
	Active	5760298	17408031	651612	Luminescence-based biochemical high throughput confirmation assay for inhibitors of the interaction of the lipase co-activator protein, abhydrolase domain containing 5 (ABHD5) with perilipin-5 (MLDP; PLIN5)	PLIN5	https://pubchem.ncbi.nlm.nih.gov/target/gene/PLIN5
	Active	5760298	17408031	588405	HTS Assay for Peg3 Promoter Inhibitors	Ppp1r15a	https://pubchem.ncbi.nlm.nih.gov/target/gene/171071
	Active	5760298	17408031	1239	High Throughput Screen to Identify Compounds that increase expression of NF-kB in Human Neuronal Cells - Primary Screen	RELA	https://pubchem.ncbi.nlm.nih.gov/target/gene/RELA
4.4668	Active	5760298	17408031	2551	qHTS for inhibitors of ROR gamma transcriptional activity	Rorc	https://pubchem.ncbi.nlm.nih.gov/target/gene/19885
10	Active	5760298	17408031	2546	VP16 counterscreen qHTS for inhibitors of ROR gamma transcriptional activity	Rorc	https://pubchem.ncbi.nlm.nih.gov/target/gene/19885
5.0119	Active	5760298	22410113	588855	qHTS for Inhibitors of TGF-b	SMAD3	https://pubchem.ncbi.nlm.nih.gov/target/gene/SMAD3
	Active	5760298	17408031	624268	Luminescence-based biochemical primary high throughput screening assay to identify inhibitors of Trypanosoma brucei methionyl tRNA synthetase (MetRS)	Tb10.70.6470	https://pubchem.ncbi.nlm.nih.gov/target/gene/Tb10.70.6470
7.3078	Active	5760298	22410113	686978	qHTS for Inhibitors of human tyrosyl-DNA phosphodiesterase 1 (TDP1): qHTS in cells in absence of CPT	TDP1	https://pubchem.ncbi.nlm.nih.gov/target/gene/TDP1
12.9953	Active	5760298	22410113	686979	qHTS for Inhibitors of human tyrosyl-DNA phosphodiesterase 1 (TDP1): qHTS in cells in presence of CPT	TDP1	https://pubchem.ncbi.nlm.nih.gov/target/gene/TDP1
	Active	5760298	22410113	463190	uHTS identification of small molecule inhibitors of tim10-1 yeast via a luminescent assay	TIM10	https://pubchem.ncbi.nlm.nih.gov/target/gene/TIM10
	Active	5760298	22410113	463195	uHTS identification of small molecule inhibitors of tim10 yeast via a luminescent assay	TIM10	https://pubchem.ncbi.nlm.nih.gov/target/gene/TIM10
	Active	5760298	22410113	463213	Single concentration confirmation of small molecule inhibitors of tim10-1 yeast via a luminescent assay	TIM10	https://pubchem.ncbi.nlm.nih.gov/target/gene/TIM10
	Active	5760298	22410113	463215	Single concentration confirmation of small molecule inhibitors of tim10 yeast via a luminescent assay	TIM10	https://pubchem.ncbi.nlm.nih.gov/target/gene/TIM10
	Active	5760298	22410113	463212	uHTS identification of small molecule inhibitors of tim23-1 yeast via a luminescent assay	TIM23	https://pubchem.ncbi.nlm.nih.gov/target/gene/855751
	Active	5760298	22410113	463218	Single concentration confirmation of small molecule inhibitors of tim23-1 yeast via a luminescent assay	TIM23	https://pubchem.ncbi.nlm.nih.gov/target/gene/855751
	Active	5760298	17408031	1852	HTS assay for identification of inhibitors of TNF-a-specific NF-kB induction	TNF	https://pubchem.ncbi.nlm.nih.gov/target/gene/TNF
	Active	5760298	17408031	624354	uHTS identification of Caspase-8 TRAIL sensitizers in a luminesence assay	TNFRSF10B	https://pubchem.ncbi.nlm.nih.gov/target/gene/TNFRSF10B
	Active	5760298	17408031	651596	Single concentration confirmation of Caspase-8 TRAIL sensitizer hits in a luminesence panel assay	TNFRSF10B	https://pubchem.ncbi.nlm.nih.gov/target/gene/TNFRSF10B
	Active	5760298	17408031	651596	Single concentration confirmation of Caspase-8 TRAIL sensitizer hits in a luminesence panel assay	TNFRSF10B	https://pubchem.ncbi.nlm.nih.gov/target/gene/TNFRSF10B
	Active	5760298	17408031	2205	HCS assay for microtubule stabilizers	TUBB	https://pubchem.ncbi.nlm.nih.gov/target/gene/TUBB
0.824	Active	5760298	17408031	2044	Luminescence Cell-Based/Microorganism Dose Confirmation HTS to Identify Inhibitors of T.Cruzi Replication.	NULL	NULL
1.2589	Active	5760298	17408031	504848	Confirmation screen for delayed death inhibitors of the malarial parasite plastid, 96 hour incubation	NULL	NULL
1.4125	Active	5760298	17408031	504850	Confirmation screen for delayed death inhibitors of the malarial parasite plastid, 48 hour incubation	NULL	NULL
2.3323	Active	5760298	17408031	504834	Primary qHTS for delayed death inhibitors of the malarial parasite plastid, 96 hour incubation	NULL	NULL
2.5119	Active	5760298	22410113	588856	qHTS for Inhibitors of TGF-b: Cytotox Counterscreen	NULL	NULL
2.9362	Active	5760298	17408031	504832	Primary qHTS for delayed death inhibitors of the malarial parasite plastid, 48 hour incubation	NULL	NULL
2.978	Active	5760298	22410113	449756	Luminescence Cell-Based Dose Retest to Confirm Inhibitors of Beta Cell Apoptosis	NULL	NULL
3.111	Active	5760298	17408031	1045	High Throughput Screen to Identify Compounds that Suppress the Growth of Human Colon Tumor Cells Lacking Oncogenic Beta Catenin Expression - Dose Response	NULL	NULL
3.636	Active	5760298	17408031	1047	High Throughput Screen to Identify Compounds that Suppress the Growth of Cells with a Deletion of the PTEN Tumor Suppressor - Dose Response	NULL	NULL
4.044	Active	5760298	22410113	463229	ATP-based Luminescence in the Absence of Cytokines Measured in Cell-Based System Using Plate Reader - 2061-06_Inhibitor_Dose_CherryPick	NULL	NULL
4.1078	Active	5760298	22410113	540256	qHTS for Inhibitors of binding or entry into cells for Lassa Virus	NULL	NULL
4.1095	Active	5760298	22410113	686971	qHTS for induction of synthetic lethality in tumor cells producing 2HG: qHTS for the HT-1080-IDH1KD cell line	NULL	NULL
6.57	Active	5760298	22410113	489024	Dose response confirmation of small molecule activators of the apoptotic arm of the Unfolded Protein response via a luminescent-based reporter assay	NULL	NULL
7.94	Active	5760298	17408031	1053143	HepG2 Cytotoxicity Assay Measured in Cell-Based System Using Plate Reader - 7071-02_Activator_Dose_CherryPick_Activity_Set2	NULL	NULL
10	Active	5760298	22410113	651820	qHTS Assay for Inhibitors of Hepatitis C Virus (HCV)	NULL	NULL
	Active	5760298	17408031	738	Screening for Modulators of Post-Golgi Transport, Control Strain	NULL	NULL
	Active	5760298	17408031	739	Modulators of Post-Golgi Transport	NULL	NULL
	Active	5760298	17408031	818	High Throughput Screen to Identify Compounds that Suppress the Growth of Human Colon Tumor Cells Lacking Oncogenic Beta Catenin Expression	NULL	NULL
	Active	5760298	17408031	827	High Throughput Screen to Identify Compounds that Suppress the Growth of Cells with a Deletion of the PTEN Tumor Suppressor	NULL	NULL
	Active	5760298	17408031	1063	Leishmania major promastigote HTS	NULL	NULL
	Active	5760298	17408031	1377	HTS to identify inhibitors of zVAD Induced Cell Death in L929 Cells.	NULL	NULL
	Active	5760298	17408031	1381	HCS to Identify Inhibitors of Dynein Mediated Cargo Transport on Microtubules.	NULL	NULL
	Active	5760298	17408031	1814	MLPCN Alpha-Synuclein 5'UTR - 5'-UTR binding - activators	NULL	NULL
	Active	5760298	17408031	1885	Luminescence Cell-Based/Microorganism Primary HTS to Identify Inhibitors of T.Cruzi Replication	NULL	NULL
	Active	5760298	17408031	2314	Cycloheximide Counterscreen for Small Molecule Inhibitors of Shiga Toxin	NULL	NULL
	Active	5760298	17408031	2314	Cycloheximide Counterscreen for Small Molecule Inhibitors of Shiga Toxin	NULL	NULL
	Active	5760298	17408031	2315	A qHTS for Small Molecule Inhibitors of Shiga Toxin	NULL	NULL
	Active	5760298	17408031	2315	A qHTS for Small Molecule Inhibitors of Shiga Toxin	NULL	NULL
	Active	5760298	22410113	435005	Luminescence Cell-Based Primary HTS to Identify Inhibitors of Beta Cell Apoptosis.	NULL	NULL
	Active	5760298	22410113	449763	uHTS identification of small molecule activators of the apoptotic arm of the Unfolded Protein response via a luminescent-based reporter assay	NULL	NULL
	Active	5760298	22410113	463112	Single concentration confirmation of small molecule activators of the apoptotic arm of the Unfolded Protein response via a luminescent-based reporter assay	NULL	NULL
	Active	5760298	17408031	463116	HCS to Identify Inhibitors of Dynein Mediated Cargo Transport on Microtubules: Confirmation Assay	NULL	NULL
	Active	5760298	17408031	504408	Heat Shock Factor-1 (HSF-1) Measured in Cell-Based System Using Plate Reader - 2038-01_Activator_SinglePoint_HTS_Activity	NULL	NULL
	Active	5760298	22410113	504607	Single concentration confirmation of inhibitors of Mdm2/MdmX interaction using a Full-Length Luciferase Counterscreen assay	NULL	NULL
	Active	5760298	17408031	602141	uHTS determination of small molecule cytotoxicity in a fluorescence assay to identify cystic fibrosis induced NFkb Inhibitors	NULL	NULL
	Active	5760298	17408031	602449	uHTS identification of small molecule inhibitors of the mitochondrial permeability transition pore via an absorbance assay	NULL	NULL
	Active	5760298	17408031	624413	Counterscreen for inhibitors of Trypanosoma brucei methionyl tRNA synthetase (MetRS): Luminescence-based cell-based high throughput assay to identify compounds that are cytotoxic to Jurkat human T lymphocyte cells	NULL	NULL
	Active	5760298	17408031	624504	Single concentration confirmation of uHTS inhibitor hits of the mitochondrial permeability transition pore via a fluorescent based assay	NULL	NULL
	Active	5760298	17408031	743398	Wnt/Beta-catenin HTS Measured in Cell-Based System Using Plate Reader - 2161-01_Activator_SinglePoint_HTS_Activity	NULL	NULL
	Active	5760298	17408031	1159606	uHTS identification of small molecule inhibitors of TWEAK-Fn14 interactions, using a cell-based reporter assay	NULL	NULL
	Active	5760298	22410113	1259313	uHTS identification of small molecule modulators of NR3A	NULL	NULL

## Sheet: Gr-1F
acvalue	activity	cid	sid	aid	aidname	targetname	targeturl
	Active	756083	24789398	488918	Single concentration confirmation of inhibitors of Sentrin-specific proteases (SENPs) using a Caspase-3 Selectivity assay	CASP3	https://pubchem.ncbi.nlm.nih.gov/target/gene/CASP3
	Active	756083	24789398	588850	uHTS identification of cystic fibrosis induced NFkb Inhibitors in a fluoresence assay	CFTR	https://pubchem.ncbi.nlm.nih.gov/target/gene/CFTR
	Active	756083	24789398	540364	Luminescence-based cell-based primary high throughput screening assay to identify activators of the GAA850 frataxin (FXN) promoter	FXN	https://pubchem.ncbi.nlm.nih.gov/target/gene/FXN
	Active	756083	24789398	588350	Counterscreen for activators of the GAA850 frataxin promoter: luminescence-based cell-based high throughput screening assay to identify activators of the GAA30 frataxin promoter	FXN	https://pubchem.ncbi.nlm.nih.gov/target/gene/FXN
	Active	756083	24789398	588351	Luminescence-based cell-based high throughput confirmation assay for activators of the GAA850 frataxin (FXN) promoter	FXN	https://pubchem.ncbi.nlm.nih.gov/target/gene/FXN
9.2	Active	756083	24789398	624296	A quantitative high throughput screen for small molecules that induce DNA re-replication in MCF 10a normal breast cells.	GMNN	https://pubchem.ncbi.nlm.nih.gov/target/gene/GMNN
	Active	756083	24789398	435030	Absorbance-based primary bacterial cell-based high throughput screening assay to identify inhibitors of AddAB recombination protein complex	HP1089	https://pubchem.ncbi.nlm.nih.gov/target/gene/HP1089
	Active	756083	24789398	488942	Absorbance-based bacterial cell-based high throughput confirmation assay for inhibitors of AddAB recombination protein complex	HP1089	https://pubchem.ncbi.nlm.nih.gov/target/gene/HP1089
	Active	756083	24789398	435030	Absorbance-based primary bacterial cell-based high throughput screening assay to identify inhibitors of AddAB recombination protein complex	HP1553	https://pubchem.ncbi.nlm.nih.gov/target/gene/HP1553
	Active	756083	24789398	488942	Absorbance-based bacterial cell-based high throughput confirmation assay for inhibitors of AddAB recombination protein complex	HP1553	https://pubchem.ncbi.nlm.nih.gov/target/gene/HP1553
25.929	Active	756083	24789398	686970	qHTS for induction of synthetic lethality in tumor cells producing 2HG: qHTS for the HT-1080-NT fibrosarcoma cell line	IDH1	https://pubchem.ncbi.nlm.nih.gov/target/gene/IDH1
	Active	756083	24789398	743279	qHTS for Inhibitors of Inflammasome Signaling: IL-1-beta AlphaLISA Primary Screen	IL1B	https://pubchem.ncbi.nlm.nih.gov/target/gene/IL1B
	Active	756083	24789398	1446	Primary cell-based high throughput assay for inhibitors of the Janus kinase 2 mutant JAK2V617F	JAK2	https://pubchem.ncbi.nlm.nih.gov/target/gene/JAK2
	Active	756083	24789398	1521	Confirmation cell-based high throughput screening assay for inhibitors of the Janus kinase 2 mutant JAK2V617F	JAK2	https://pubchem.ncbi.nlm.nih.gov/target/gene/JAK2
	Active	756083	24789398	588405	HTS Assay for Peg3 Promoter Inhibitors	Ppp1r15a	https://pubchem.ncbi.nlm.nih.gov/target/gene/171071
	Active	756083	24789398	488955	Counterscreen for AddAB inhibitors: absorbance-based high throughput cell-based assay to identify inhibitors of RecBCD	recB	https://pubchem.ncbi.nlm.nih.gov/target/gene/recB
	Active	756083	24789398	488955	Counterscreen for AddAB inhibitors: absorbance-based high throughput cell-based assay to identify inhibitors of RecBCD	recC	https://pubchem.ncbi.nlm.nih.gov/target/gene/recC
	Active	756083	24789398	488955	Counterscreen for AddAB inhibitors: absorbance-based high throughput cell-based assay to identify inhibitors of RecBCD	recD	https://pubchem.ncbi.nlm.nih.gov/target/gene/recD
7.9433	Active	756083	24789398	2551	qHTS for inhibitors of ROR gamma transcriptional activity	Rorc	https://pubchem.ncbi.nlm.nih.gov/target/gene/19885
	Active	756083	24789398	2599	uHTS Luminescent assay for identification of inhibitors of Sentrin-specific protease 6 (SENP6)	SENP6	https://pubchem.ncbi.nlm.nih.gov/target/gene/SENP6
	Active	756083	24789398	488915	Single concentration confirmation of uHTS for inhibitors of Sentrin-specific protease 6 (SENP6) using a Luminescent assay	SENP6	https://pubchem.ncbi.nlm.nih.gov/target/gene/SENP6
	Active	756083	24789398	434973	uHTS Luminescent assay for identification of inhibitors of Sentrin-specific protease 7 (SENP7)	SENP7	https://pubchem.ncbi.nlm.nih.gov/target/gene/SENP7
	Active	756083	24789398	488917	Single concentration confirmation of uHTS for inhibitors of Sentrin-specific protease 7 (SENP7) using a Luminescent assay	SENP7	https://pubchem.ncbi.nlm.nih.gov/target/gene/SENP7
	Active	756083	24789398	2540	HTS Luminescent assay for identification of inhibitors of Sentrin-specific protease 8 (SENP8)	SENP8	https://pubchem.ncbi.nlm.nih.gov/target/gene/SENP8
	Active	756083	24789398	488912	Single concentration confirmation of uHTS for inhibitors of Sentrin-specific protease 8 (SENP8) using a Luminescent assay	SENP8	https://pubchem.ncbi.nlm.nih.gov/target/gene/SENP8
	Active	756083	24789398	488919	Single concentration confirmation of inhibitors of Sentrin-specific proteases (SENPs) using a Luminescent Interference Counterscreen assay	SENP8	https://pubchem.ncbi.nlm.nih.gov/target/gene/SENP8
	Active	756083	24789398	932	Primary cell-based high throughput screening assay to measure STAT1 activation	STAT1	https://pubchem.ncbi.nlm.nih.gov/target/gene/STAT1
10.3225	Active	756083	24789398	686978	qHTS for Inhibitors of human tyrosyl-DNA phosphodiesterase 1 (TDP1): qHTS in cells in absence of CPT	TDP1	https://pubchem.ncbi.nlm.nih.gov/target/gene/TDP1
25.929	Active	756083	24789398	686979	qHTS for Inhibitors of human tyrosyl-DNA phosphodiesterase 1 (TDP1): qHTS in cells in presence of CPT	TDP1	https://pubchem.ncbi.nlm.nih.gov/target/gene/TDP1
0.195	Active	756083	24789398	1626	High Throughput Screen to Identify Inhibitors of Mycobacterium tuberculosis H37Rv	NULL	NULL
0.28	Active	756083	24789398	488890	Elucidation of physiology of non-replicating, drug-tolerant Mycobacterium tuberculosis	NULL	NULL
0.46	Active	756083	24789398	588397	qHTS of small molecules that selectively kill Giardia lamblia: Hit Validation.	NULL	NULL
0.7	Active	756083	24789398	492952	A Cell Based Secondary Assay to Explore Compounds that Modulate Non-Replicating, Drug-tolerant Compounds in Replicating H37Rv TB of Mycobacterium tuberculosis	NULL	NULL
1.132	Active	756083	24789398	2423	Fluorescence Cell-Based Secondary Assay to Identify Inhibitors of Resistant C. albicans Growth in the Presence of Fluconazole	NULL	NULL
1.873	Active	756083	24789398	2467	Fluorescence Cell-Based Retest of C. albicans Growth in the Presence of Fluconazole	NULL	NULL
6.86	Active	756083	103061993	504665	SAR Analysis of small molecule inhibitors of T-cell specific antigen receptor-induced NF-kB activation in a Jurkat cell line using a luminescence assay - Set 2	NULL	NULL
6.87	Active	756083	24789398	492998	A Cell Based Secondary Assay to Explore Cytotoxicity in Vero E6 Cells of Compounds that Modulate Non-Replicating, Drug-tolerant Mycobacterium tuberculosis	NULL	NULL
12.5893	Active	756083	24789398	651820	qHTS Assay for Inhibitors of Hepatitis C Virus (HCV)	NULL	NULL
12.9953	Active	756083	24789398	686971	qHTS for induction of synthetic lethality in tumor cells producing 2HG: qHTS for the HT-1080-IDH1KD cell line	NULL	NULL
14.172	Active	756083	24789398	2327	Fluorescence Cell-Based Secondary Assay for toxicity in mammalian fibroblasts	NULL	NULL
15.075	Active	756083	24789398	489018	A Cell Based Secondary Assay to Explore Cytotoxicity in HepG2 Cells of Compounds that Modulate Non-Replicating, Drug-tolerant Mycobacterium tuberculosis	NULL	NULL
16.194	Active	756083	24789398	489025	A Cell Based Secondary Assay to Explore Cytotoxicity in THP-1 Cells of Compounds that Modulate Non-Replicating, Drug-tolerant Mycobacterium tuberculosis	NULL	NULL
21.3313	Active	756083	24789398	588342	qHTS profiling assay for firefly luciferase inhibitor/activator using purifed enzyme and Km concentrations of substrates (counterscreen for miR-21 project)	NULL	NULL
	Active	756083	24789398	1063	Leishmania major promastigote HTS	NULL	NULL
	Active	756083	24789398	1520	Counterscreen for inhibitors of mutant JAK2V617F: Cell-based high throughput screening assay for inhibitors of parental Ba/F3 cell viability.	NULL	NULL
	Active	756083	24789398	1825	Luminescence-based counterscreen assay for KLF5 inhibitors: cell-based high throughput screening assay to identify cytotoxic compounds using the IEC-6 intestinal epithelial cell line.	NULL	NULL
	Active	756083	24789398	1979	Fluorescence Cell-Based Primary HTS of C.albicans growth in the presence of Fluconazole and compound	NULL	NULL
	Active	756083	24789398	2023	Multiplex HTS Screen of TOR pathway GFP-fusion proteins in Saccharomyes cerevisiae_specifically_ LAP4_MLPCN.	NULL	NULL
	Active	756083	24789398	2314	Cycloheximide Counterscreen for Small Molecule Inhibitors of Shiga Toxin	NULL	NULL
	Active	756083	24789398	2314	Cycloheximide Counterscreen for Small Molecule Inhibitors of Shiga Toxin	NULL	NULL
	Active	756083	24789398	2315	A qHTS for Small Molecule Inhibitors of Shiga Toxin	NULL	NULL
	Active	756083	24789398	2315	A qHTS for Small Molecule Inhibitors of Shiga Toxin	NULL	NULL
	Active	756083	24789398	449728	Counterscreen for inhibitors of AddAB: absorbance-based bacterial cell-based high throughput screening assay to identify inhibitors of bacterial viability	NULL	NULL
	Active	756083	24789398	488956	Counterscreen for AddAB inhibitors: absorbance-based bacterial cell-based high throughput confirmation assay for inhibitors of bacterial viability	NULL	NULL
	Active	756083	24789398	540267	Small Molecules that selectively kill Giardia lamblia: qHTS	NULL	NULL
	Active	756083	24789398	602141	uHTS determination of small molecule cytotoxicity in a fluorescence assay to identify cystic fibrosis induced NFkb Inhibitors	NULL	NULL
	Active	756083	24789398	651723	MLPCN PGC1a Modulators Measured in Cell-Based System Using Plate Reader - 2139-01_Activator_SinglePoint_HTS_Activity	NULL	NULL
	Active	756083	125094631	1053175	A screen for compounds that inhibit growth of Escherichia coli	NULL	NULL

## Sheet: Gr-3A
acvalue	activity	cid	sid	aid	aidname	targetname	targeturl
	Active	739449	49825546	2521	uHTS identification of small molecule antagonists of the APJ receptor via a luminescent beta-arrestin assay	APLNR	https://pubchem.ncbi.nlm.nih.gov/target/gene/APLNR
4.4	Active	739449	49825546	504669	Dose Response confirmation of Inhibitors of Mdm2/MdmX interaction using a Brca1/Bard1 BiLC Counterscreen assay	BARD1	https://pubchem.ncbi.nlm.nih.gov/target/gene/BARD1
	Active	739449	49825546	504668	Single concentration confirmation of inhibitors of Mdm2/MdmX interaction using a Brca1/Bard1 BiLC Counterscreen assay.	BARD1	https://pubchem.ncbi.nlm.nih.gov/target/gene/BARD1
25.1	Active	739449	49825546	504333	qHTS Assay for Inhibitors of BAZ2B	BAZ2B	https://pubchem.ncbi.nlm.nih.gov/target/gene/BAZ2B
4.4	Active	739449	49825546	504669	Dose Response confirmation of Inhibitors of Mdm2/MdmX interaction using a Brca1/Bard1 BiLC Counterscreen assay	BRCA1	https://pubchem.ncbi.nlm.nih.gov/target/gene/BRCA1
	Active	739449	49825546	504668	Single concentration confirmation of inhibitors of Mdm2/MdmX interaction using a Brca1/Bard1 BiLC Counterscreen assay.	BRCA1	https://pubchem.ncbi.nlm.nih.gov/target/gene/BRCA1
	Active	739449	49825546	493098	uHTS identification of small molecule antagonists of the CCR6 receptor via a luminescent beta-arrestin assay	CCR6	https://pubchem.ncbi.nlm.nih.gov/target/gene/CCR6
	Active	739449	49825546	652054	qHTS of D3 Dopamine Receptor Antagonist: qHTS	DRD3	https://pubchem.ncbi.nlm.nih.gov/target/gene/DRD3
13	Active	739449	49825546	624297	A quantitative high throughput screen for small molecules that induce DNA re-replication in SW480 colon adenocarcinoma cells.	GMNN	https://pubchem.ncbi.nlm.nih.gov/target/gene/GMNN
	Active	739449	49825546	488847	RNA aptamer-based HTS for inhibitors of GRK2	GRK2	https://pubchem.ncbi.nlm.nih.gov/target/gene/GRK2
	Active	739449	49825546	743279	qHTS for Inhibitors of Inflammasome Signaling: IL-1-beta AlphaLISA Primary Screen	IL1B	https://pubchem.ncbi.nlm.nih.gov/target/gene/IL1B
3.7	Active	739449	49825546	504593	Dose Response confirmation of Inhibitors of Mdm2/MdmX interaction in luminescent format	MDM2	https://pubchem.ncbi.nlm.nih.gov/target/gene/MDM2
	Active	739449	49825546	485346	uHTS for identification of Inhibitors of Mdm2/MdmX interaction in luminescent format.	MDM2	https://pubchem.ncbi.nlm.nih.gov/target/gene/MDM2
	Active	739449	49825546	489028	Single concentration confirmation of uHTS for Inhibitors of Mdm2/MdmX interaction in luminescent format.	MDM2	https://pubchem.ncbi.nlm.nih.gov/target/gene/MDM2
	Active	739449	49825546	504601	Single concentration confirmation of uHTS for Inhibitors of Mdm2/MdmX interaction in luminescent format - Set 2	MDM2	https://pubchem.ncbi.nlm.nih.gov/target/gene/MDM2
3.7	Active	739449	49825546	504593	Dose Response confirmation of Inhibitors of Mdm2/MdmX interaction in luminescent format	MDM4	https://pubchem.ncbi.nlm.nih.gov/target/gene/MDM4
	Active	739449	49825546	485346	uHTS for identification of Inhibitors of Mdm2/MdmX interaction in luminescent format.	MDM4	https://pubchem.ncbi.nlm.nih.gov/target/gene/MDM4
	Active	739449	49825546	489028	Single concentration confirmation of uHTS for Inhibitors of Mdm2/MdmX interaction in luminescent format.	MDM4	https://pubchem.ncbi.nlm.nih.gov/target/gene/MDM4
	Active	739449	49825546	504601	Single concentration confirmation of uHTS for Inhibitors of Mdm2/MdmX interaction in luminescent format - Set 2	MDM4	https://pubchem.ncbi.nlm.nih.gov/target/gene/MDM4
5.8	Active	739449	26755347	504444	Nrf2 qHTS screen for inhibitors	NFE2L2	https://pubchem.ncbi.nlm.nih.gov/target/gene/NFE2L2
11.6	Active	739449	49825546	504444	Nrf2 qHTS screen for inhibitors	NFE2L2	https://pubchem.ncbi.nlm.nih.gov/target/gene/NFE2L2
11	Active	739449	103574622	317143	Induction of human IkappaBalpha stabilization in OCI-Ly3 cells by green light emiting IkappaBalpha-fused luciferase reporter gene assay	NFKBIA	https://pubchem.ncbi.nlm.nih.gov/target/gene/NFKBIA
12	Active	739449	103574622	317145	Induction of human IkappaBalpha stabilization in OCI-Ly3 cells assessed as ratio of green light emiting IkappaBalpha-fused luciferase expression to red light emiting native luciferase expression	NFKBIA	https://pubchem.ncbi.nlm.nih.gov/target/gene/NFKBIA
	Active	739449	49825546	1578	uHTS luminescence assay for the identification of compounds that inhibit NOD1	NOD1	https://pubchem.ncbi.nlm.nih.gov/target/gene/NOD1
	Active	739449	49825546	1566	uHTS luminescence assay for the identification of compounds that inhibit NOD2	NOD2	https://pubchem.ncbi.nlm.nih.gov/target/gene/NOD2
7.8	Active	739449	49825546	1778	uHTS identification of small molecule antagonists of the kappa opioid receptor via a luminescent beta-arrestin assay	OPRK1	https://pubchem.ncbi.nlm.nih.gov/target/gene/OPRK1
	Active	739449	49825546	651724	qHTS Assay for Inhibitors of the CtBP/E1A Interaction	RBBP8	https://pubchem.ncbi.nlm.nih.gov/target/gene/RBBP8
3.2	Active	739449	103574622	317146	Inhibition of TNF-alpha-stimulated human NF-kappaB p65 RelA subunit nuclear translocation in HUVEC	RELA	https://pubchem.ncbi.nlm.nih.gov/target/gene/RELA
0.5	Active	739449	26755346	2551	qHTS for inhibitors of ROR gamma transcriptional activity	Rorc	https://pubchem.ncbi.nlm.nih.gov/target/gene/19885
0.7	Active	739449	49825546	2551	qHTS for inhibitors of ROR gamma transcriptional activity	Rorc	https://pubchem.ncbi.nlm.nih.gov/target/gene/19885
1	Active	739449	49825546	2546	VP16 counterscreen qHTS for inhibitors of ROR gamma transcriptional activity	Rorc	https://pubchem.ncbi.nlm.nih.gov/target/gene/19885
1.4	Active	739449	26755346	2546	VP16 counterscreen qHTS for inhibitors of ROR gamma transcriptional activity	Rorc	https://pubchem.ncbi.nlm.nih.gov/target/gene/19885
	Active	739449	49825546	651725	qHTS Assay for Inhibitors of the Six1/Eya2 Interaction	SIX1	https://pubchem.ncbi.nlm.nih.gov/target/gene/SIX1
1.3	Active	739449	124892357	588855	qHTS for Inhibitors of TGF-b	SMAD3	https://pubchem.ncbi.nlm.nih.gov/target/gene/SMAD3
6.3	Active	739449	49825546	588855	qHTS for Inhibitors of TGF-b	SMAD3	https://pubchem.ncbi.nlm.nih.gov/target/gene/SMAD3
8.2	Active	739449	49825546	720536	qHTS for Inhibitors of TGF-b: CCL64 Cells Orthogonal Assay for Cherry Picks	SMAD3	https://pubchem.ncbi.nlm.nih.gov/target/gene/SMAD3
13	Active	739449	49825546	720534	qHTS for Inhibitors of TGF-b: Confirmation of Cherry Picks	SMAD3	https://pubchem.ncbi.nlm.nih.gov/target/gene/SMAD3
0.8	Active	739449	124892357	686979	qHTS for Inhibitors of human tyrosyl-DNA phosphodiesterase 1 (TDP1): qHTS in cells in presence of CPT	TDP1	https://pubchem.ncbi.nlm.nih.gov/target/gene/TDP1
2	Active	739449	124892357	686978	qHTS for Inhibitors of human tyrosyl-DNA phosphodiesterase 1 (TDP1): qHTS in cells in absence of CPT	TDP1	https://pubchem.ncbi.nlm.nih.gov/target/gene/TDP1
2.6	Active	739449	49825546	686978	qHTS for Inhibitors of human tyrosyl-DNA phosphodiesterase 1 (TDP1): qHTS in cells in absence of CPT	TDP1	https://pubchem.ncbi.nlm.nih.gov/target/gene/TDP1
3.3	Active	739449	49825546	686979	qHTS for Inhibitors of human tyrosyl-DNA phosphodiesterase 1 (TDP1): qHTS in cells in presence of CPT	TDP1	https://pubchem.ncbi.nlm.nih.gov/target/gene/TDP1
13.9	Active	739449	49825546	504672	Dose Response confirmation of uHTS small molecule inhibitors of tim23-1: a luminescent TIM10 yeast counterscreen.	TIM10	https://pubchem.ncbi.nlm.nih.gov/target/gene/TIM10
	Active	739449	49825546	463195	uHTS identification of small molecule inhibitors of tim10 yeast via a luminescent assay	TIM10	https://pubchem.ncbi.nlm.nih.gov/target/gene/TIM10
7.7	Active	739449	49825546	493002	Dose Response confirmation of uHTS small molecule inhibitors of tim23-1 yeast via a luminescent assay	TIM23	https://pubchem.ncbi.nlm.nih.gov/target/gene/855751
	Active	739449	49825546	463212	uHTS identification of small molecule inhibitors of tim23-1 yeast via a luminescent assay	TIM23	https://pubchem.ncbi.nlm.nih.gov/target/gene/855751
	Active	739449	49825546	463218	Single concentration confirmation of small molecule inhibitors of tim23-1 yeast via a luminescent assay	TIM23	https://pubchem.ncbi.nlm.nih.gov/target/gene/855751
2.3	Active	739449	49825546	504832	Primary qHTS for delayed death inhibitors of the malarial parasite plastid, 48 hour incubation	NULL	NULL
2.7	Active	739449	49825546	504609	Dose Response confirmation of Inhibitors of Mdm2/MdmX interaction using a Full-Length Luciferase Counterscreen assay	NULL	NULL
3.2	Active	739449	103574622	448438	Inhibition of NF-kappaB activation	NULL	NULL
7.7	Active	739449	49825546	489024	Dose response confirmation of small molecule activators of the apoptotic arm of the Unfolded Protein response via a luminescent-based reporter assay	NULL	NULL
8.6	Active	739449	49825546	1650	A Cell Based Secondary Assay To Explore Cytotoxicity of West Nile Virus Anti-Viral Hit Compounds	NULL	NULL
10	Active	739449	103574622	317148	Inhibition of TNFalpha stimulated human NF-kappaB-mediated beta lactamase gene expression in HUVEC	NULL	NULL
11.6	Active	739449	49825546	686971	qHTS for induction of synthetic lethality in tumor cells producing 2HG: qHTS for the HT-1080-IDH1KD cell line	NULL	NULL
11.6	Active	739449	49825546	1994	Luminescence Cell-Based Dose Response HTS to Identify Inhibitors of 5'UTR Stem-Loop Driven Prion Protein mRNA Translation in H4 Neuroglioblastoma Cells	NULL	NULL
13	Active	739449	49825546	651558	qHTS Assay to Find Inhibitors of Chronic Active B-Cell Receptor Signaling: Hit Validation in Primary Screen	NULL	NULL
14.1	Active	739449	49825546	1990	Luminescence Cell-Based Dose Response HTS to Identify Inhibitors of Luciferase Translation or Activity in H4 Neuroglioblastoma Cells	NULL	NULL
56.2	Active	739449	26755346	504339	qHTS Assay for Inhibitors of JMJD2A-Tudor Domain	NULL	NULL
56.2	Active	739449	26755347	504339	qHTS Assay for Inhibitors of JMJD2A-Tudor Domain	NULL	NULL
56.2	Active	739449	49825546	504339	qHTS Assay for Inhibitors of JMJD2A-Tudor Domain	NULL	NULL
	Active	739449	49825546	1825	Luminescence-based counterscreen assay for KLF5 inhibitors: cell-based high throughput screening assay to identify cytotoxic compounds using the IEC-6 intestinal epithelial cell line.	NULL	NULL
	Active	739449	49825546	1907	Luminescence-based confirmation cell-based assay for cytotoxic compounds using the IEC-6 intestinal epithelial cell line.	NULL	NULL
	Active	739449	49825546	435003	uHTS luminescence assay for the identification of chemical inhibitors of T-cell specific antigen receptor-induced NF-kB activation	NULL	NULL
	Active	739449	49825546	449763	uHTS identification of small molecule activators of the apoptotic arm of the Unfolded Protein response via a luminescent-based reporter assay	NULL	NULL
	Active	739449	49825546	463112	Single concentration confirmation of small molecule activators of the apoptotic arm of the Unfolded Protein response via a luminescent-based reporter assay	NULL	NULL
	Active	739449	49825546	504408	Heat Shock Factor-1 (HSF-1) Measured in Cell-Based System Using Plate Reader - 2038-01_Activator_SinglePoint_HTS_Activity	NULL	NULL
	Active	739449	49825546	504607	Single concentration confirmation of inhibitors of Mdm2/MdmX interaction using a Full-Length Luciferase Counterscreen assay	NULL	NULL
	Active	739449	348403025	1259354	Small-molecule inhibitors of ST2 (IL1RL1)	NULL	NULL
	Active	739449	348403025	1259354	Small-molecule inhibitors of ST2 (IL1RL1)	NULL	NULL
	Active	739449	348403025	1259354	Small-molecule inhibitors of ST2 (IL1RL1)	NULL	NULL
	Active	739449	348403025	1259354	Small-molecule inhibitors of ST2 (IL1RL1)	NULL	NULL
	Active	739449	348403025	1259354	Small-molecule inhibitors of ST2 (IL1RL1)	NULL	NULL
	Active	739449	348403025	1259354	Small-molecule inhibitors of ST2 (IL1RL1)	NULL	NULL
	Active	739449	348403025	1259354	Small-molecule inhibitors of ST2 (IL1RL1)	NULL	NULL
	Active	739449	348403025	1259354	Small-molecule inhibitors of ST2 (IL1RL1)	NULL	NULL
	Active	739449	348403025	1259354	Small-molecule inhibitors of ST2 (IL1RL1)	NULL	NULL
	Active	739449	348403025	1259354	Small-molecule inhibitors of ST2 (IL1RL1)	NULL	NULL
	Active	739449	348403025	1259354	Small-molecule inhibitors of ST2 (IL1RL1)	NULL	NULL
	Active	739449	348403025	1259354	Small-molecule inhibitors of ST2 (IL1RL1)	NULL	NULL

## Sheet: Gr-3B
acvalue	activity	cid	sid	aid	aidname	targetname	targeturl
	Active	82533	14734290	504454	HTS for Beta-2AR agonists via FAP method	ADRB2	https://pubchem.ncbi.nlm.nih.gov/target/gene/ADRB2
3.673	Active	82533	14734290	463214	Dose Response screen for antagonists of Angiotensin II Receptor Type 1 to assess selectivity of uHTS small molecule antagonists hits of the APJ receptor	AGTR1	https://pubchem.ncbi.nlm.nih.gov/target/gene/AGTR1
	Active	82533	14734290	2521	uHTS identification of small molecule antagonists of the APJ receptor via a luminescent beta-arrestin assay	APLNR	https://pubchem.ncbi.nlm.nih.gov/target/gene/APLNR
	Active	82533	14734290	2766	Single concentration confirmation of uHTS hits from a small molecule antagonists of the APJ receptor via a luminescent beta-arrestin assay	APLNR	https://pubchem.ncbi.nlm.nih.gov/target/gene/APLNR
	Active	82533	14734290	624129	Dose Response confirmation of uHTS hits from a small molecule antagonists of the CXCR6 receptor in a screening assay	APLNR	https://pubchem.ncbi.nlm.nih.gov/target/gene/APLNR
	Active	82533	14734290	623870	ARNT-TAC3: AlphaScreen HTS to detect disruption of ARNT/TAC3 interactions Measured in Biochemical System Using Plate Reader - 2158-01_Inhibitor_SinglePoint_HTS_Activity	ARNT	https://pubchem.ncbi.nlm.nih.gov/target/gene/ARNT
	Active	82533	14734290	504668	Single concentration confirmation of inhibitors of Mdm2/MdmX interaction using a Brca1/Bard1 BiLC Counterscreen assay.	BARD1	https://pubchem.ncbi.nlm.nih.gov/target/gene/BARD1
	Active	82533	14734290	624371	Counterscreen for inhibitors of the interaction of nucleotide-binding oligomerization domain containing 2 (NOD2) and receptor-interacting serine-threonine kinase 2 (RIPK2): Fluorescence-based cell-based high throughput assay to identify non-selective inhi	bla	https://pubchem.ncbi.nlm.nih.gov/target/gene/4290808
	Active	82533	14734290	504668	Single concentration confirmation of inhibitors of Mdm2/MdmX interaction using a Brca1/Bard1 BiLC Counterscreen assay.	BRCA1	https://pubchem.ncbi.nlm.nih.gov/target/gene/BRCA1
	Active	82533	14734290	493098	uHTS identification of small molecule antagonists of the CCR6 receptor via a luminescent beta-arrestin assay	CCR6	https://pubchem.ncbi.nlm.nih.gov/target/gene/CCR6
	Active	82533	14734290	624129	Dose Response confirmation of uHTS hits from a small molecule antagonists of the CXCR6 receptor in a screening assay	CCR6	https://pubchem.ncbi.nlm.nih.gov/target/gene/CCR6
	Active	82533	14734290	588850	uHTS identification of cystic fibrosis induced NFkb Inhibitors in a fluoresence assay	CFTR	https://pubchem.ncbi.nlm.nih.gov/target/gene/CFTR
	Active	82533	14734290	602252	Fluorescence Polarization with CAL-PDZ Measured in Biochemical System Using Plate Reader - 2109-02_Inhibitor_SinglePoint_HTS_Activity	CFTR	https://pubchem.ncbi.nlm.nih.gov/target/gene/CFTR
	Active	82533	14734290	624125	Fluorescence-based cell-based primary high throughput screening assay to identify antagonists of the human cholinergic receptor, muscarinic 4 (CHRM4)	CHRM4	https://pubchem.ncbi.nlm.nih.gov/target/gene/CHRM4
	Active	82533	14734290	602244	uHTS identification of CXCR6 Inhibitors in a B-arrestin luminescence assay	CXCR6	https://pubchem.ncbi.nlm.nih.gov/target/gene/CXCR6
	Active	82533	14734290	624129	Dose Response confirmation of uHTS hits from a small molecule antagonists of the CXCR6 receptor in a screening assay	CXCR6	https://pubchem.ncbi.nlm.nih.gov/target/gene/CXCR6
	Active	82533	14734290	652054	qHTS of D3 Dopamine Receptor Antagonist: qHTS	DRD3	https://pubchem.ncbi.nlm.nih.gov/target/gene/DRD3
	Active	82533	14734290	624352	uHTS identification of HIF-2a Inhibitors in a luminesence assay	EPAS1	https://pubchem.ncbi.nlm.nih.gov/target/gene/EPAS1
	Active	82533	14734290	651580	Single concentration confirmation of uHTS identification of HIF-2a Inhibitors in a luminesence assay	EPAS1	https://pubchem.ncbi.nlm.nih.gov/target/gene/EPAS1
	Active	82533	14734290	651581	Dose response confirmation of uHTS identification of HIF-2a Inhibitors in screening - selectivity counterscreen assays	EPAS1	https://pubchem.ncbi.nlm.nih.gov/target/gene/EPAS1
	Active	82533	14734290	588413	uHTS identification of Gli-Sufu Antagonists in a luminescence reporter assay	Gli1	https://pubchem.ncbi.nlm.nih.gov/target/gene/14632
	Active	82533	14734290	602252	Fluorescence Polarization with CAL-PDZ Measured in Biochemical System Using Plate Reader - 2109-02_Inhibitor_SinglePoint_HTS_Activity	GOPC	https://pubchem.ncbi.nlm.nih.gov/target/gene/GOPC
99	Active	82533	14734290	651581	Dose response confirmation of uHTS identification of HIF-2a Inhibitors in screening - selectivity counterscreen assays	HIF1A	https://pubchem.ncbi.nlm.nih.gov/target/gene/HIF1A
12.5893	Active	82533	14734290	1688	qHTS Multiplex Assay to Identify Dual Action Probes in a Cell Model of Huntington: Aggregate Formation (GFP)	HTT	https://pubchem.ncbi.nlm.nih.gov/target/gene/HTT
	Active	82533	14734290	743279	qHTS for Inhibitors of Inflammasome Signaling: IL-1-beta AlphaLISA Primary Screen	IL1B	https://pubchem.ncbi.nlm.nih.gov/target/gene/IL1B
	Active	82533	14734290	463193	High-content cell-based screening for modulators of autophagy	MAP1LC3A	https://pubchem.ncbi.nlm.nih.gov/target/gene/MAP1LC3A
	Active	82533	14734290	485346	uHTS for identification of Inhibitors of Mdm2/MdmX interaction in luminescent format.	MDM2	https://pubchem.ncbi.nlm.nih.gov/target/gene/MDM2
	Active	82533	14734290	489028	Single concentration confirmation of uHTS for Inhibitors of Mdm2/MdmX interaction in luminescent format.	MDM2	https://pubchem.ncbi.nlm.nih.gov/target/gene/MDM2
	Active	82533	14734290	504601	Single concentration confirmation of uHTS for Inhibitors of Mdm2/MdmX interaction in luminescent format - Set 2	MDM2	https://pubchem.ncbi.nlm.nih.gov/target/gene/MDM2
	Active	82533	14734290	485346	uHTS for identification of Inhibitors of Mdm2/MdmX interaction in luminescent format.	MDM4	https://pubchem.ncbi.nlm.nih.gov/target/gene/MDM4
	Active	82533	14734290	489028	Single concentration confirmation of uHTS for Inhibitors of Mdm2/MdmX interaction in luminescent format.	MDM4	https://pubchem.ncbi.nlm.nih.gov/target/gene/MDM4
	Active	82533	14734290	504601	Single concentration confirmation of uHTS for Inhibitors of Mdm2/MdmX interaction in luminescent format - Set 2	MDM4	https://pubchem.ncbi.nlm.nih.gov/target/gene/MDM4
5.552	Active	82533	14734290	493073	MITF Measured in Cell-Based System Using Plate Reader - 2084-01_Inhibitor_DoseNoFile_CherryPick_Activity_Set3	MITF	https://pubchem.ncbi.nlm.nih.gov/target/gene/MITF
5.552	Active	82533	14734290	493102	MITF Measured in Cell-Based System Using Plate Reader - 2084-01_Inhibitor_DoseNoFile_CherryPick_Activity_Set4	MITF	https://pubchem.ncbi.nlm.nih.gov/target/gene/MITF
5.552	Active	82533	14734290	493177	MITF Measured in Cell-Based System Using Plate Reader - 2084-01_Inhibitor_DoseNoFile_CherryPick_Activity_Set2	MITF	https://pubchem.ncbi.nlm.nih.gov/target/gene/MITF
35	Active	82533	14734290	540346	MITF: Counter assay: A375 proliferation Measured in Cell-Based System Using Plate Reader - 2084-03_Inhibitor_Dose_DryPowder_Activity	MITF	https://pubchem.ncbi.nlm.nih.gov/target/gene/MITF
	Active	82533	14734290	488899	MITF Measured in Cell-Based System Using Plate Reader - 2084-01_Inhibitor_SinglePoint_HTS_Activity	MITF	https://pubchem.ncbi.nlm.nih.gov/target/gene/MITF
	Active	82533	14734290	602163	Absorbance-based biochemical primary high throughput screening assay to identify activators of Methionine sulfoxide reductase A (MsrA)	MSRA	https://pubchem.ncbi.nlm.nih.gov/target/gene/281312
6.5131	Active	82533	14734290	504444	Nrf2 qHTS screen for inhibitors	NFE2L2	https://pubchem.ncbi.nlm.nih.gov/target/gene/NFE2L2
	Active	82533	14734290	1578	uHTS luminescence assay for the identification of compounds that inhibit NOD1	NOD1	https://pubchem.ncbi.nlm.nih.gov/target/gene/NOD1
	Active	82533	14734290	1566	uHTS luminescence assay for the identification of compounds that inhibit NOD2	NOD2	https://pubchem.ncbi.nlm.nih.gov/target/gene/NOD2
	Active	82533	14734290	624267	Fluorescence-based cell-based primary high throughput screening assay to identify inhibitors of the interaction of nucleotide-binding oligomerization domain containing 2 (NOD2) and the receptor-interacting serine-threonine kinase 2 (RIPK2)	NOD2	https://pubchem.ncbi.nlm.nih.gov/target/gene/NOD2
	Active	82533	14734290	624370	Fluorescence-based cell-based high throughput confirmation assay for inhibitors of the interaction of nucleotide-binding oligomerization domain containing 2 (NOD2) and the receptor-interacting serine-threonine kinase 2 (RIPK2)	NOD2	https://pubchem.ncbi.nlm.nih.gov/target/gene/NOD2
	Active	82533	14734290	602229	Luminescence-based cell-based high throughput primary screening assay to identify agonists of nuclear receptor subfamily 2, group E, member 3 (NR2E3)	NR2E3	https://pubchem.ncbi.nlm.nih.gov/target/gene/NR2E3
	Active	82533	14734290	504357	Luminescence-based cell-based primary high throughput screening assay to identify inverse agonists of heterodimerization of the mu 1 (OPRM1) and delta 1 (OPRD1) opioid receptors	OPRD1	https://pubchem.ncbi.nlm.nih.gov/target/gene/OPRD1
2.57	Active	82533	14734290	1778	uHTS identification of small molecule antagonists of the kappa opioid receptor via a luminescent beta-arrestin assay	OPRK1	https://pubchem.ncbi.nlm.nih.gov/target/gene/OPRK1
	Active	82533	14734290	504357	Luminescence-based cell-based primary high throughput screening assay to identify inverse agonists of heterodimerization of the mu 1 (OPRM1) and delta 1 (OPRD1) opioid receptors	OPRM1	https://pubchem.ncbi.nlm.nih.gov/target/gene/OPRM1
	Active	82533	14734290	588405	HTS Assay for Peg3 Promoter Inhibitors	Ppp1r15a	https://pubchem.ncbi.nlm.nih.gov/target/gene/171071
	Active	82533	14734290	720596	TRFRET-based cell-based primary high throughput screening assay to identify inhibitors of cell surface Prion Protein (PRPC)	PRNP	https://pubchem.ncbi.nlm.nih.gov/target/gene/PRNP
	Active	82533	14734290	743200	TRFRET-based cell-based high throughput confirmation assay to identify inhibitors of cell surface Prion Protein (PRPC)	PRNP	https://pubchem.ncbi.nlm.nih.gov/target/gene/PRNP
	Active	82533	14734290	743201	Counterscreen for inhibitors of cell surface Prion Protein (PrPc): Luminescence-based cell-based high throughput assay to identify compounds that are cytotoxic to LD9 cells	PRNP	https://pubchem.ncbi.nlm.nih.gov/target/gene/PRNP
	Active	82533	14734290	624267	Fluorescence-based cell-based primary high throughput screening assay to identify inhibitors of the interaction of nucleotide-binding oligomerization domain containing 2 (NOD2) and the receptor-interacting serine-threonine kinase 2 (RIPK2)	RIPK2	https://pubchem.ncbi.nlm.nih.gov/target/gene/RIPK2
	Active	82533	14734290	624370	Fluorescence-based cell-based high throughput confirmation assay for inhibitors of the interaction of nucleotide-binding oligomerization domain containing 2 (NOD2) and the receptor-interacting serine-threonine kinase 2 (RIPK2)	RIPK2	https://pubchem.ncbi.nlm.nih.gov/target/gene/RIPK2
1.122	Active	82533	26755343	2551	qHTS for inhibitors of ROR gamma transcriptional activity	Rorc	https://pubchem.ncbi.nlm.nih.gov/target/gene/19885
1.2589	Active	82533	14734290	2551	qHTS for inhibitors of ROR gamma transcriptional activity	Rorc	https://pubchem.ncbi.nlm.nih.gov/target/gene/19885
1.7783	Active	82533	26755343	2546	VP16 counterscreen qHTS for inhibitors of ROR gamma transcriptional activity	Rorc	https://pubchem.ncbi.nlm.nih.gov/target/gene/19885
2.5119	Active	82533	14734290	2546	VP16 counterscreen qHTS for inhibitors of ROR gamma transcriptional activity	Rorc	https://pubchem.ncbi.nlm.nih.gov/target/gene/19885
1.418	Active	82533	14734290	1821	Fluorescence-based counterscreen assay for S1P4 antagonists: Cell-based dose response high throughput screening assay to identify antagonists of the Sphingosine 1-Phosphate Receptor 1 (S1P1)	S1PR1	https://pubchem.ncbi.nlm.nih.gov/target/gene/S1PR1
	Active	82533	14734290	1564	Counterscreen assay for S1P4 antagonists: Cell-based high throughput screening assay to identify antagonists of the Sphingosine 1-Phosphate Receptor 1 (S1P1)	S1PR1	https://pubchem.ncbi.nlm.nih.gov/target/gene/S1PR1
0.5502	Active	82533	87241449	2332	Late stage fluorescence dose response cell-based screening assay for antagonists of the Sphingosine 1-Phosphate Receptor 4 (S1P4)	S1PR4	https://pubchem.ncbi.nlm.nih.gov/target/gene/S1PR4
0.63	Active	82533	14734290	1692	Fluorescence dose response cell-based high throughput screening assay for antagonists of the Sphingosine 1-Phosphate Receptor 4 (S1P4)	S1PR4	https://pubchem.ncbi.nlm.nih.gov/target/gene/S1PR4
	Active	82533	14734290	1510	Primary Cell-Based Assay to Identify Antagonists of the Sphingosine 1-Phosphate Receptor 4 (S1P4)	S1PR4	https://pubchem.ncbi.nlm.nih.gov/target/gene/S1PR4
	Active	82533	14734290	1524	Confirmation cell-based high throughput assay for antagonists of the Sphingosine 1-Phosphate Receptor 4 (S1P4)	S1PR4	https://pubchem.ncbi.nlm.nih.gov/target/gene/S1PR4
	Active	82533	14734290	651725	qHTS Assay for Inhibitors of the Six1/Eya2 Interaction	SIX1	https://pubchem.ncbi.nlm.nih.gov/target/gene/SIX1
	Active	82533	14734290	1456	Identification of Novel Modulators of Cl- dependent Transport Process via HTS: Primary Screen	SLC12A5	https://pubchem.ncbi.nlm.nih.gov/target/gene/SLC12A5
	Active	82533	14734290	1714	Identification of Novel Modulators of Cl- dependent Transport Process via HTS: Secondary Assay 3 with KCC2 cells	SLC12A5	https://pubchem.ncbi.nlm.nih.gov/target/gene/SLC12A5
3.9811	Active	82533	14734290	588855	qHTS for Inhibitors of TGF-b	SMAD3	https://pubchem.ncbi.nlm.nih.gov/target/gene/SMAD3
8.1995	Active	82533	14734290	720536	qHTS for Inhibitors of TGF-b: CCL64 Cells Orthogonal Assay for Cherry Picks	SMAD3	https://pubchem.ncbi.nlm.nih.gov/target/gene/SMAD3
16.3601	Active	82533	14734290	720534	qHTS for Inhibitors of TGF-b: Confirmation of Cherry Picks	SMAD3	https://pubchem.ncbi.nlm.nih.gov/target/gene/SMAD3
	Active	82533	14734290	623870	ARNT-TAC3: AlphaScreen HTS to detect disruption of ARNT/TAC3 interactions Measured in Biochemical System Using Plate Reader - 2158-01_Inhibitor_SinglePoint_HTS_Activity	TACC3	https://pubchem.ncbi.nlm.nih.gov/target/gene/TACC3
35.4813	Active	82533	14734290	652104	qHTS of TDP-43 Inhibitors	TARDBP	https://pubchem.ncbi.nlm.nih.gov/target/gene/TARDBP
20.5962	Active	82533	14734290	686978	qHTS for Inhibitors of human tyrosyl-DNA phosphodiesterase 1 (TDP1): qHTS in cells in absence of CPT	TDP1	https://pubchem.ncbi.nlm.nih.gov/target/gene/TDP1
	Active	82533	14734290	504734	Fluorescence-based cell-based primary high throughput screening assay to identify inhibitors of TLR9-MyD88 binding.	TLR9	https://pubchem.ncbi.nlm.nih.gov/target/gene/TLR9
	Active	82533	14734290	1852	HTS assay for identification of inhibitors of TNF-a-specific NF-kB induction	TNF	https://pubchem.ncbi.nlm.nih.gov/target/gene/TNF
1.06	Active	82533	103061991	504512	SAR Analysis of small molecule inhibitors of both B-cell and T-cell specific antigen receptor-induced NF-kB activation in a Jurkat cell line using a luminescence assay	NULL	NULL
1.844	Active	82533	14734290	1972	Luminescence-based dose response cell-based high throughput screening assay for cytotoxic compounds using the IEC-6 intestinal epithelial cell line.	NULL	NULL
2.18	Active	82533	242289235	1256275	Inhibition of Cks1-Skp2 (unknown origin) interaction after 30 mins by ELISA	NULL	NULL
2.21	Active	82533	103061991	504489	SAR Analysis of small molecule inhibitors of B-cell and T-cell specific antigen receptor-induced NF-kB activation in a 697B cell line using a luminescence assay	NULL	NULL
2.46	Active	82533	242289235	1256279	Antiproliferative activity against human HT1080 cells after 6 days	NULL	NULL
2.48	Active	82533	242289235	1256278	Antiproliferative activity against human A549 cells after 6 days	NULL	NULL
2.505	Active	82533	14734290	1045	High Throughput Screen to Identify Compounds that Suppress the Growth of Human Colon Tumor Cells Lacking Oncogenic Beta Catenin Expression - Dose Response	NULL	NULL
2.838	Active	82533	14734290	1047	High Throughput Screen to Identify Compounds that Suppress the Growth of Cells with a Deletion of the PTEN Tumor Suppressor - Dose Response	NULL	NULL
3.6964	Active	82533	14734290	504834	Primary qHTS for delayed death inhibitors of the malarial parasite plastid, 96 hour incubation	NULL	NULL
4.41	Active	82533	14734290	489024	Dose response confirmation of small molecule activators of the apoptotic arm of the Unfolded Protein response via a luminescent-based reporter assay	NULL	NULL
5.35	Active	82533	242289235	1256280	Antiproliferative activity against human H1299 cells after 2 days	NULL	NULL
5.6234	Active	82533	14734290	504848	Confirmation screen for delayed death inhibitors of the malarial parasite plastid, 96 hour incubation	NULL	NULL
6.89	Active	82533	14734290	1650	A Cell Based Secondary Assay To Explore Cytotoxicity of West Nile Virus Anti-Viral Hit Compounds	NULL	NULL
7.0795	Active	82533	14734290	504850	Confirmation screen for delayed death inhibitors of the malarial parasite plastid, 48 hour incubation	NULL	NULL
7.54	Active	82533	242289235	1256281	Antiproliferative activity against human A549 cells after 2 days	NULL	NULL
8.1995	Active	82533	14734290	651558	qHTS Assay to Find Inhibitors of Chronic Active B-Cell Receptor Signaling: Hit Validation in Primary Screen	NULL	NULL
11.498	Active	82533	14734290	1988	Luminescence Cell-Based Dose Confimation HTS to Identify Inhibitors of of 5'UTR Stem-Loop Driven Alpha-Synuclein mRNA Translation in H4 Neuroglioblastoma Cells	NULL	NULL
13.742	Active	82533	14734290	1990	Luminescence Cell-Based Dose Response HTS to Identify Inhibitors of Luciferase Translation or Activity in H4 Neuroglioblastoma Cells	NULL	NULL
15.19	Active	82533	14734290	1994	Luminescence Cell-Based Dose Response HTS to Identify Inhibitors of 5'UTR Stem-Loop Driven Prion Protein mRNA Translation in H4 Neuroglioblastoma Cells	NULL	NULL
18.1	Active	82533	103061991	504506	SAR Analysis of small molecule inhibitors of both B-cell and T-cell specific antigen receptor-induced NF-kB activation in a HEK-293T cell line using a luminescence assay	NULL	NULL
28.1838	Active	82533	14734290	1159524	High Throughput Screening for Foot and Mouth Disease Virus Antivirals	NULL	NULL
35	Active	82533	14734290	540335	MITF: Counter assay: A375 proliferation Measured in Cell-Based System Using Plate Reader - 2084-03_Inhibitor_Dose_CherryPick_Activity_Set2	NULL	NULL
	Active	82533	124413	147	NCI Yeast Anticancer Drug Screen. Data for the rad52 strain	NULL	NULL
	Active	82533	124413	149	NCI Yeast Anticancer Drug Screen. Data for the wt1 strain	NULL	NULL
	Active	82533	124413	153	NCI Yeast Anticancer Drug Screen. Data for the mgt1 strain	NULL	NULL
	Active	82533	124413	155	NCI Yeast Anticancer Drug Screen. Data for the rad50 strain	NULL	NULL
	Active	82533	124413	157	NCI Yeast Anticancer Drug Screen. Data for the mec2-1 strain	NULL	NULL
	Active	82533	124413	159	NCI Yeast Anticancer Drug Screen. Data for the rad14 strain	NULL	NULL
	Active	82533	124413	171	NCI Yeast Anticancer Drug Screen. Data for the mlh1 strain	NULL	NULL
	Active	82533	124413	173	NCI Yeast Anticancer Drug Screen. Data for the sgs1 strain	NULL	NULL
	Active	82533	124413	175	NCI Yeast Anticancer Drug Screen. Data for the mlh1 rad18 strain	NULL	NULL
	Active	82533	124413	177	NCI Yeast Anticancer Drug Screen. Data for the rad18 strain	NULL	NULL
	Active	82533	14734290	598	Human H69AR Lung Tumor Cell Growth Inhibition Assay - 86K Screen	NULL	NULL
	Active	82533	14734290	719	Human Lung Fibroblast Proliferation Assay	NULL	NULL
	Active	82533	14734290	818	High Throughput Screen to Identify Compounds that Suppress the Growth of Human Colon Tumor Cells Lacking Oncogenic Beta Catenin Expression	NULL	NULL
	Active	82533	14734290	827	High Throughput Screen to Identify Compounds that Suppress the Growth of Cells with a Deletion of the PTEN Tumor Suppressor	NULL	NULL
	Active	82533	14734290	1063	Leishmania major promastigote HTS	NULL	NULL
	Active	82533	14734290	1716	Identification of Novel Modulators of Cl- dependent Transport Process via HTS: Counterscreen with HEK cells	NULL	NULL
	Active	82533	14734290	1717	Identification of Novel Modulators of Cl- dependent Transport Process via HTS: Retesting of KCC2 cells with Ouabain	NULL	NULL
	Active	82533	14734290	1813	MLPCN Alpha-Synuclein 5'UTR - 5'-UTR binding - inhibitors	NULL	NULL
	Active	82533	14734290	1825	Luminescence-based counterscreen assay for KLF5 inhibitors: cell-based high throughput screening assay to identify cytotoxic compounds using the IEC-6 intestinal epithelial cell line.	NULL	NULL
	Active	82533	14734290	1907	Luminescence-based confirmation cell-based assay for cytotoxic compounds using the IEC-6 intestinal epithelial cell line.	NULL	NULL
	Active	82533	14734290	2717	Luminescence Cell-Based Primary HTS to Identify Inhibitors of Cancer Stem Cells	NULL	NULL
	Active	82533	14734290	435003	uHTS luminescence assay for the identification of chemical inhibitors of T-cell specific antigen receptor-induced NF-kB activation	NULL	NULL
	Active	82533	14734290	449763	uHTS identification of small molecule activators of the apoptotic arm of the Unfolded Protein response via a luminescent-based reporter assay	NULL	NULL
	Active	82533	14734290	463079	Fluorescence-based counterscreen for orexin 1 receptor (OX1R) antagonists: cell-based assay to identify antagonists of the parental CHO cell line	NULL	NULL
	Active	82533	14734290	463112	Single concentration confirmation of small molecule activators of the apoptotic arm of the Unfolded Protein response via a luminescent-based reporter assay	NULL	NULL
	Active	82533	14734290	504408	Heat Shock Factor-1 (HSF-1) Measured in Cell-Based System Using Plate Reader - 2038-01_Activator_SinglePoint_HTS_Activity	NULL	NULL
	Active	82533	14734290	504607	Single concentration confirmation of inhibitors of Mdm2/MdmX interaction using a Full-Length Luciferase Counterscreen assay	NULL	NULL
	Active	82533	14734290	1159606	uHTS identification of small molecule inhibitors of TWEAK-Fn14 interactions, using a cell-based reporter assay	NULL	NULL
	Active	82533	318172757	1224903	Identification of CBX7 inhibitors - Primary Alpha Screen	NULL	NULL
	Active	82533	242289235	1256276	Inhibition of Cks1-Skp2 (unknown origin) interaction assessed as increase in p27-GFP level by western blot analysis	NULL	NULL
	Active	82533	242289235	1256277	Inhibition of Cks1-Skp2 (unknown origin) interaction assessed as increase in p27-GFP level by ELISA	NULL	NULL

## Sheet: Gr-3C
acvalue	activity	cid	sid	aid	aidname	targetname	targeturl
	Active	1070159	26755348	2472	qHTS Assay for Inhibitors of Fructose-1,6-bisphosphate Aldolase from Giardia Lamblia: Coupling assay counterscreen	GAPDH	https://pubchem.ncbi.nlm.nih.gov/target/gene/GAPDH
	Active	1070159	29216384	2472	qHTS Assay for Inhibitors of Fructose-1,6-bisphosphate Aldolase from Giardia Lamblia: Coupling assay counterscreen	GAPDH	https://pubchem.ncbi.nlm.nih.gov/target/gene/GAPDH
8.5	Active	1070159	103575036	317145	Induction of human IkappaBalpha stabilization in OCI-Ly3 cells assessed as ratio of green light emiting IkappaBalpha-fused luciferase expression to red light emiting native luciferase expression	NFKBIA	https://pubchem.ncbi.nlm.nih.gov/target/gene/NFKBIA
11	Active	1070159	103575036	317143	Induction of human IkappaBalpha stabilization in OCI-Ly3 cells by green light emiting IkappaBalpha-fused luciferase reporter gene assay	NFKBIA	https://pubchem.ncbi.nlm.nih.gov/target/gene/NFKBIA
2	Active	1070159	103575036	317146	Inhibition of TNF-alpha-stimulated human NF-kappaB p65 RelA subunit nuclear translocation in HUVEC	RELA	https://pubchem.ncbi.nlm.nih.gov/target/gene/RELA
1.5849	Active	1070159	29216384	2551	qHTS for inhibitors of ROR gamma transcriptional activity	Rorc	https://pubchem.ncbi.nlm.nih.gov/target/gene/19885
2.2387	Active	1070159	29216384	2546	VP16 counterscreen qHTS for inhibitors of ROR gamma transcriptional activity	Rorc	https://pubchem.ncbi.nlm.nih.gov/target/gene/19885
2.5119	Active	1070159	26755348	2546	VP16 counterscreen qHTS for inhibitors of ROR gamma transcriptional activity	Rorc	https://pubchem.ncbi.nlm.nih.gov/target/gene/19885
6.3096	Active	1070159	26755348	2551	qHTS for inhibitors of ROR gamma transcriptional activity	Rorc	https://pubchem.ncbi.nlm.nih.gov/target/gene/19885
2	Active	1070159	103575036	448438	Inhibition of NF-kappaB activation	NULL	NULL
7.0795	Active	1070159	29216384	720532	qHTS for Inhibitors of binding or entry into cells for Marburg Virus	NULL	NULL
13.5	Active	1070159	103575036	317148	Inhibition of TNFalpha stimulated human NF-kappaB-mediated beta lactamase gene expression in HUVEC	NULL	NULL
14.0919	Active	1070159	29216384	2451	qHTS Assay for Inhibitors of Fructose-1,6-bisphosphate Aldolase from Giardia Lamblia	NULL	NULL
15.8114	Active	1070159	26755348	2451	qHTS Assay for Inhibitors of Fructose-1,6-bisphosphate Aldolase from Giardia Lamblia	NULL	NULL
17.7828	Active	1070159	29216384	720533	qHTS for Inhibitors of binding or entry into cells for Lassa Virus	NULL	NULL
56.2341	Active	1070159	26755348	504339	qHTS Assay for Inhibitors of JMJD2A-Tudor Domain	NULL	NULL

## Sheet: Gr-7C
acvalue	activity	cid	sid	aid	aidname	targetname	targeturl
	Active	5767688	87337483	602281	Luminescence-based biochemical primary high throughput screening assay to identify inhibitors of the interaction of the lipase co-activator protein, abhydrolase domain containing 5 (ABHD5) with perilipin-5 (MLDP; PLIN5)	ABHD5	https://pubchem.ncbi.nlm.nih.gov/target/gene/ABHD5
	Active	5767688	87337483	651612	Luminescence-based biochemical high throughput confirmation assay for inhibitors of the interaction of the lipase co-activator protein, abhydrolase domain containing 5 (ABHD5) with perilipin-5 (MLDP; PLIN5)	ABHD5	https://pubchem.ncbi.nlm.nih.gov/target/gene/ABHD5
	Active	5767688	87337483	504454	HTS for Beta-2AR agonists via FAP method	ADRB2	https://pubchem.ncbi.nlm.nih.gov/target/gene/ADRB2
35.4813	Active	5767688	17408270	651635	qHTS for Inhibitors of ATXN expression	ATXN2	https://pubchem.ncbi.nlm.nih.gov/target/gene/ATXN2
	Active	5767688	17408270	504668	Single concentration confirmation of inhibitors of Mdm2/MdmX interaction using a Brca1/Bard1 BiLC Counterscreen assay.	BARD1	https://pubchem.ncbi.nlm.nih.gov/target/gene/BARD1
	Active	5767688	17408270	504668	Single concentration confirmation of inhibitors of Mdm2/MdmX interaction using a Brca1/Bard1 BiLC Counterscreen assay.	BRCA1	https://pubchem.ncbi.nlm.nih.gov/target/gene/BRCA1
	Active	5767688	87337483	588850	uHTS identification of cystic fibrosis induced NFkb Inhibitors in a fluoresence assay	CFTR	https://pubchem.ncbi.nlm.nih.gov/target/gene/CFTR
	Active	5767688	87337483	624125	Fluorescence-based cell-based primary high throughput screening assay to identify antagonists of the human cholinergic receptor, muscarinic 4 (CHRM4)	CHRM4	https://pubchem.ncbi.nlm.nih.gov/target/gene/CHRM4
	Active	5767688	17408270	778	CYP2C19 Assay	CYP2C19	https://pubchem.ncbi.nlm.nih.gov/target/gene/CYP2C19
	Active	5767688	17408270	2732	HTS for small molecule inhibitors of CHOP to regulate the unfolded protein response to ER stress	Ddit3	https://pubchem.ncbi.nlm.nih.gov/target/gene/13198
32.36	Active	5767688	17408270	449750	Fluorescence Cell-Free Homogeneous Secondary Screen to Identify Non-Covalent Inhibitors of RecA-Intein Splicing Activity	dnaB	https://pubchem.ncbi.nlm.nih.gov/target/gene/dnaB
	Active	5767688	87337483	624352	uHTS identification of HIF-2a Inhibitors in a luminesence assay	EPAS1	https://pubchem.ncbi.nlm.nih.gov/target/gene/EPAS1
	Active	5767688	87337483	651580	Single concentration confirmation of uHTS identification of HIF-2a Inhibitors in a luminesence assay	EPAS1	https://pubchem.ncbi.nlm.nih.gov/target/gene/EPAS1
9.2	Active	5767688	17408270	624296	A quantitative high throughput screen for small molecules that induce DNA re-replication in MCF 10a normal breast cells.	GMNN	https://pubchem.ncbi.nlm.nih.gov/target/gene/GMNN
9.2	Active	5767688	17408270	624297	A quantitative high throughput screen for small molecules that induce DNA re-replication in SW480 colon adenocarcinoma cells.	GMNN	https://pubchem.ncbi.nlm.nih.gov/target/gene/GMNN
	Active	5767688	87337483	651636	uHTS identification of small molecule antagonists of the EBI2 receptor via a luminescent beta-arrestin assay	GPR183	https://pubchem.ncbi.nlm.nih.gov/target/gene/GPR183
	Active	5767688	87337483	651589	Single concentration confirmation of HIF-2a Inhibitors in a HIF-1a counterscreen in human MiAPaCa-2 Cells luciferase reporter assay	HIF1A	https://pubchem.ncbi.nlm.nih.gov/target/gene/HIF1A
	Active	5767688	87337483	651674	Counterscreen for inhibitors of the interaction of the lipase co-activator protein, abhydrolase domain containing 5 (ABHD5) with perilipin-5 (MLDP; PLIN5): Luminescence-based biochemical high throughput assay to identify inhibitors of Hepatocyte nuclear f	HNF4A	https://pubchem.ncbi.nlm.nih.gov/target/gene/HNF4A
6.3096	Active	5767688	17408270	686970	qHTS for induction of synthetic lethality in tumor cells producing 2HG: qHTS for the HT-1080-NT fibrosarcoma cell line	IDH1	https://pubchem.ncbi.nlm.nih.gov/target/gene/IDH1
	Active	5767688	17408270	743279	qHTS for Inhibitors of Inflammasome Signaling: IL-1-beta AlphaLISA Primary Screen	IL1B	https://pubchem.ncbi.nlm.nih.gov/target/gene/IL1B
	Active	5767688	17408270	1917	High throughput discovery of novel modulators of ROMK K+ channel activity: Retest of Primary Hits	KCNJ1	https://pubchem.ncbi.nlm.nih.gov/target/gene/KCNJ1
	Active	5767688	17408270	2156	Primary cell-based high-throughput screening assay for identification of compounds that inhibit KCNQ2 potassium channels	Kcnq2	https://pubchem.ncbi.nlm.nih.gov/target/gene/170848
	Active	5767688	17408270	485346	uHTS for identification of Inhibitors of Mdm2/MdmX interaction in luminescent format.	MDM2	https://pubchem.ncbi.nlm.nih.gov/target/gene/MDM2
	Active	5767688	17408270	489028	Single concentration confirmation of uHTS for Inhibitors of Mdm2/MdmX interaction in luminescent format.	MDM2	https://pubchem.ncbi.nlm.nih.gov/target/gene/MDM2
	Active	5767688	17408270	504601	Single concentration confirmation of uHTS for Inhibitors of Mdm2/MdmX interaction in luminescent format - Set 2	MDM2	https://pubchem.ncbi.nlm.nih.gov/target/gene/MDM2
	Active	5767688	17408270	485346	uHTS for identification of Inhibitors of Mdm2/MdmX interaction in luminescent format.	MDM4	https://pubchem.ncbi.nlm.nih.gov/target/gene/MDM4
	Active	5767688	17408270	489028	Single concentration confirmation of uHTS for Inhibitors of Mdm2/MdmX interaction in luminescent format.	MDM4	https://pubchem.ncbi.nlm.nih.gov/target/gene/MDM4
	Active	5767688	17408270	504601	Single concentration confirmation of uHTS for Inhibitors of Mdm2/MdmX interaction in luminescent format - Set 2	MDM4	https://pubchem.ncbi.nlm.nih.gov/target/gene/MDM4
	Active	5767688	87337483	488899	MITF Measured in Cell-Based System Using Plate Reader - 2084-01_Inhibitor_SinglePoint_HTS_Activity	MITF	https://pubchem.ncbi.nlm.nih.gov/target/gene/MITF
	Active	5767688	87337483	588820	Luminescence-based cell-based high throughput confirmation assay for inhibitors of the Steroid Receptor Coactivator 1 (SRC1; NCOA1).	NCOA1	https://pubchem.ncbi.nlm.nih.gov/target/gene/NCOA1
	Active	5767688	87337483	651957	Luminescence-based cell-based primary high throughput screening assay to identify inhibitors of the Steroid Receptor Coactivator 2 (SRC2; NCOA2)	NCOA2	https://pubchem.ncbi.nlm.nih.gov/target/gene/NCOA2
	Active	5767688	87337483	652008	Luminescence-based cell-based high throughput confirmation assay to identify inhibitors of the Steroid Receptor Coactivator 2 (SRC2; NCOA2)	NCOA2	https://pubchem.ncbi.nlm.nih.gov/target/gene/NCOA2
	Active	5767688	87337483	588352	Luminescence-based cell-based primary high throughput screening assay to identify inhibitors of the Steroid Receptor Coactivator 3 (SRC3; NCOA3)	NCOA3	https://pubchem.ncbi.nlm.nih.gov/target/gene/NCOA3
	Active	5767688	87337483	588792	Luminescence-based cell-based high throughput confirmation assay for inhibitors of the Steroid Receptor Coactivator 3 (SRC3; NCOA3)	NCOA3	https://pubchem.ncbi.nlm.nih.gov/target/gene/NCOA3
20.5962	Active	5767688	17408270	504444	Nrf2 qHTS screen for inhibitors	NFE2L2	https://pubchem.ncbi.nlm.nih.gov/target/gene/NFE2L2
	Active	5767688	17408270	1578	uHTS luminescence assay for the identification of compounds that inhibit NOD1	NOD1	https://pubchem.ncbi.nlm.nih.gov/target/gene/NOD1
6.399	Active	5767688	87337483	651553	Fluorescence-based cell-based high throughput dose response assay for inhibitors of the interaction of nucleotide-binding oligomerization domain containing 2 (NOD2) and the receptor-interacting serine-threonine kinase 2 (RIPK2)	NOD2	https://pubchem.ncbi.nlm.nih.gov/target/gene/NOD2
	Active	5767688	17408270	1566	uHTS luminescence assay for the identification of compounds that inhibit NOD2	NOD2	https://pubchem.ncbi.nlm.nih.gov/target/gene/NOD2
	Active	5767688	87337483	624267	Fluorescence-based cell-based primary high throughput screening assay to identify inhibitors of the interaction of nucleotide-binding oligomerization domain containing 2 (NOD2) and the receptor-interacting serine-threonine kinase 2 (RIPK2)	NOD2	https://pubchem.ncbi.nlm.nih.gov/target/gene/NOD2
	Active	5767688	87337483	624370	Fluorescence-based cell-based high throughput confirmation assay for inhibitors of the interaction of nucleotide-binding oligomerization domain containing 2 (NOD2) and the receptor-interacting serine-threonine kinase 2 (RIPK2)	NOD2	https://pubchem.ncbi.nlm.nih.gov/target/gene/NOD2
	Active	5767688	17408270	1861	Fluorescence-based primary cell-based high throughput screening assay to identify antagonists of the G-protein coupled receptor 7 (GPR7).	NPBWR1	https://pubchem.ncbi.nlm.nih.gov/target/gene/NPBWR1
10	Active	5767688	17408270	1461	qHTS Assay for Antagonists of the Neuropeptide S Receptor: cAMP Signal Transduction	NPSR1	https://pubchem.ncbi.nlm.nih.gov/target/gene/NPSR1
	Active	5767688	17408270	1040	Primary cell-based high-throughput screening assay for antagonists of NPY-Y1	NPY1R	https://pubchem.ncbi.nlm.nih.gov/target/gene/NPY1R
	Active	5767688	17408270	1255	Counterscreen assay for antagonists of neuropeptide Y receptor Y1 (NPY-Y1): Cell-based high throughput assay to measure NPY-Y2 antagonism	NPY2R	https://pubchem.ncbi.nlm.nih.gov/target/gene/NPY2R
	Active	5767688	87337483	602229	Luminescence-based cell-based high throughput primary screening assay to identify agonists of nuclear receptor subfamily 2, group E, member 3 (NR2E3)	NR2E3	https://pubchem.ncbi.nlm.nih.gov/target/gene/NR2E3
	Active	5767688	87337483	686940	Luminescence-based cell-based primary high throughput screening assay to identify inhibitors of COUP-TFII (NR2F2)	NR2F2	https://pubchem.ncbi.nlm.nih.gov/target/gene/NR2F2
	Active	5767688	87337483	687008	Luminescence-based cell-based high throughput confirmation assay to identify inhibitors of COUP-TFII (NR2F2)	NR2F2	https://pubchem.ncbi.nlm.nih.gov/target/gene/NR2F2
	Active	5767688	87337483	651614	Counterscreen for inverse agonists of the liver receptor homolog-1 (LRH-1; NR5A2): Luminescence-based cell-based high throughput assay to identify inverse agonists of the Steroidogenic Factor 1 Nuclear Receptor (SF1; NR5A1)	NR5A1	https://pubchem.ncbi.nlm.nih.gov/target/gene/NR5A1
	Active	5767688	87337483	651613	Luminescence-based cell-based high throughput confirmation assay for inverse agonists of the liver receptor homolog-1 (LRH-1; NR5A2)	NR5A2	https://pubchem.ncbi.nlm.nih.gov/target/gene/NR5A2
	Active	5767688	87337483	602281	Luminescence-based biochemical primary high throughput screening assay to identify inhibitors of the interaction of the lipase co-activator protein, abhydrolase domain containing 5 (ABHD5) with perilipin-5 (MLDP; PLIN5)	PLIN5	https://pubchem.ncbi.nlm.nih.gov/target/gene/PLIN5
	Active	5767688	87337483	651612	Luminescence-based biochemical high throughput confirmation assay for inhibitors of the interaction of the lipase co-activator protein, abhydrolase domain containing 5 (ABHD5) with perilipin-5 (MLDP; PLIN5)	PLIN5	https://pubchem.ncbi.nlm.nih.gov/target/gene/PLIN5
	Active	5767688	87337483	588405	HTS Assay for Peg3 Promoter Inhibitors	Ppp1r15a	https://pubchem.ncbi.nlm.nih.gov/target/gene/171071
27.3	Active	5767688	17408270	435010	Fluorescence Cell-Free Homogeneous Dose Retest to Identify Inhibitors of RecA-Intein Splicing Activity	recA	https://pubchem.ncbi.nlm.nih.gov/target/gene/recA
47.5	Active	5767688	17408270	434968	Fluorescence Cell-Free Homogeneous Counter Screen to Identify Inhibitors of GFP Chromophore Formation	recA	https://pubchem.ncbi.nlm.nih.gov/target/gene/recA
	Active	5767688	17408270	2221	Fluorescence Cell-Free Homogenous Primary HTS to Identify Inhibitors of RecA Intein Splicing Activity	recA	https://pubchem.ncbi.nlm.nih.gov/target/gene/recA
6.399	Active	5767688	87337483	651553	Fluorescence-based cell-based high throughput dose response assay for inhibitors of the interaction of nucleotide-binding oligomerization domain containing 2 (NOD2) and the receptor-interacting serine-threonine kinase 2 (RIPK2)	RIPK2	https://pubchem.ncbi.nlm.nih.gov/target/gene/RIPK2
	Active	5767688	87337483	624267	Fluorescence-based cell-based primary high throughput screening assay to identify inhibitors of the interaction of nucleotide-binding oligomerization domain containing 2 (NOD2) and the receptor-interacting serine-threonine kinase 2 (RIPK2)	RIPK2	https://pubchem.ncbi.nlm.nih.gov/target/gene/RIPK2
	Active	5767688	87337483	624370	Fluorescence-based cell-based high throughput confirmation assay for inhibitors of the interaction of nucleotide-binding oligomerization domain containing 2 (NOD2) and the receptor-interacting serine-threonine kinase 2 (RIPK2)	RIPK2	https://pubchem.ncbi.nlm.nih.gov/target/gene/RIPK2
19.9526	Active	5767688	17408270	2546	VP16 counterscreen qHTS for inhibitors of ROR gamma transcriptional activity	Rorc	https://pubchem.ncbi.nlm.nih.gov/target/gene/19885
	Active	5767688	17408270	1564	Counterscreen assay for S1P4 antagonists: Cell-based high throughput screening assay to identify antagonists of the Sphingosine 1-Phosphate Receptor 1 (S1P1)	S1PR1	https://pubchem.ncbi.nlm.nih.gov/target/gene/S1PR1
	Active	5767688	17408270	736	Primary Cell-Based High-Throughput Screening to Identify Antagonists of the Sphingosine 1-phosphate receptor 2 (S1P2)	S1PR2	https://pubchem.ncbi.nlm.nih.gov/target/gene/S1PR2
	Active	5767688	17408270	1510	Primary Cell-Based Assay to Identify Antagonists of the Sphingosine 1-Phosphate Receptor 4 (S1P4)	S1PR4	https://pubchem.ncbi.nlm.nih.gov/target/gene/S1PR4
	Active	5767688	17408270	1524	Confirmation cell-based high throughput assay for antagonists of the Sphingosine 1-Phosphate Receptor 4 (S1P4)	S1PR4	https://pubchem.ncbi.nlm.nih.gov/target/gene/S1PR4
19.9526	Active	5767688	17408270	485364	qHTS Assay for the Inhibitors of Schistosoma Mansoni Peroxiredoxins	Smp_048430	https://pubchem.ncbi.nlm.nih.gov/target/gene/Smp_048430
5.1735	Active	5767688	17408270	686979	qHTS for Inhibitors of human tyrosyl-DNA phosphodiesterase 1 (TDP1): qHTS in cells in presence of CPT	TDP1	https://pubchem.ncbi.nlm.nih.gov/target/gene/TDP1
7.3078	Active	5767688	17408270	686978	qHTS for Inhibitors of human tyrosyl-DNA phosphodiesterase 1 (TDP1): qHTS in cells in absence of CPT	TDP1	https://pubchem.ncbi.nlm.nih.gov/target/gene/TDP1
	Active	5767688	17408270	463190	uHTS identification of small molecule inhibitors of tim10-1 yeast via a luminescent assay	TIM10	https://pubchem.ncbi.nlm.nih.gov/target/gene/TIM10
	Active	5767688	17408270	463195	uHTS identification of small molecule inhibitors of tim10 yeast via a luminescent assay	TIM10	https://pubchem.ncbi.nlm.nih.gov/target/gene/TIM10
	Active	5767688	17408270	463213	Single concentration confirmation of small molecule inhibitors of tim10-1 yeast via a luminescent assay	TIM10	https://pubchem.ncbi.nlm.nih.gov/target/gene/TIM10
	Active	5767688	17408270	463215	Single concentration confirmation of small molecule inhibitors of tim10 yeast via a luminescent assay	TIM10	https://pubchem.ncbi.nlm.nih.gov/target/gene/TIM10
	Active	5767688	17408270	463212	uHTS identification of small molecule inhibitors of tim23-1 yeast via a luminescent assay	TIM23	https://pubchem.ncbi.nlm.nih.gov/target/gene/855751
	Active	5767688	17408270	463218	Single concentration confirmation of small molecule inhibitors of tim23-1 yeast via a luminescent assay	TIM23	https://pubchem.ncbi.nlm.nih.gov/target/gene/855751
	Active	5767688	17408270	1852	HTS assay for identification of inhibitors of TNF-a-specific NF-kB induction	TNF	https://pubchem.ncbi.nlm.nih.gov/target/gene/TNF
5.0119	Active	5767688	17408270	588453	qHTS Assay for Inhibitors of Mammalian Selenoprotein Thioredoxin Reductase 1 (TrxR1): qHTS	Txnrd1	https://pubchem.ncbi.nlm.nih.gov/target/gene/58819
22.3872	Active	5767688	17408270	504847	Inhibitors of the vitamin D receptor (VDR): qHTS	VDR	https://pubchem.ncbi.nlm.nih.gov/target/gene/VDR
3.2944	Active	5767688	17408270	504834	Primary qHTS for delayed death inhibitors of the malarial parasite plastid, 96 hour incubation	NULL	NULL
3.5481	Active	5767688	17408270	1159524	High Throughput Screening for Foot and Mouth Disease Virus Antivirals	NULL	NULL
3.898	Active	5767688	17408270	1626	High Throughput Screen to Identify Inhibitors of Mycobacterium tuberculosis H37Rv	NULL	NULL
4.084	Active	5767688	17408270	1045	High Throughput Screen to Identify Compounds that Suppress the Growth of Human Colon Tumor Cells Lacking Oncogenic Beta Catenin Expression - Dose Response	NULL	NULL
4.397	Active	5767688	17408270	1047	High Throughput Screen to Identify Compounds that Suppress the Growth of Cells with a Deletion of the PTEN Tumor Suppressor - Dose Response	NULL	NULL
4.4668	Active	5767688	17408270	588856	qHTS for Inhibitors of TGF-b: Cytotox Counterscreen	NULL	NULL
5.35	Active	5767688	87337483	624132	Schnurri-3 Inhibitors: specific inducers of adult bone formation Measured in Cell-Based System Using Plate Reader - 2134-01_Inhibitor_Dose_CherryPick_Activity	NULL	NULL
5.35	Active	5767688	87337483	743417	Schnurri-3 Inhibitors: specific inducers of adult bone formation Measured in Cell-Based System Using Plate Reader - 2134-01_Inhibitor_Dose_DryPowder_Activity_Set2	NULL	NULL
5.6234	Active	5767688	17408270	686971	qHTS for induction of synthetic lethality in tumor cells producing 2HG: qHTS for the HT-1080-IDH1KD cell line	NULL	NULL
6.04	Active	5767688	87337483	720514	MLPCN PGC1a Modulators Measured in Cell-Based System Using Plate Reader - 2139-01_Inhibitor_Dose_CherryPick_Activity	NULL	NULL
6.18	Active	5767688	17408270	489024	Dose response confirmation of small molecule activators of the apoptotic arm of the Unfolded Protein response via a luminescent-based reporter assay	NULL	NULL
6.51	Active	5767688	17408270	449756	Luminescence Cell-Based Dose Retest to Confirm Inhibitors of Beta Cell Apoptosis	NULL	NULL
6.5733	Active	5767688	17408270	504832	Primary qHTS for delayed death inhibitors of the malarial parasite plastid, 48 hour incubation	NULL	NULL
6.932	Active	5767688	17408270	463229	ATP-based Luminescence in the Absence of Cytokines Measured in Cell-Based System Using Plate Reader - 2061-06_Inhibitor_Dose_CherryPick	NULL	NULL
7.9433	Active	5767688	17408270	651820	qHTS Assay for Inhibitors of Hepatitis C Virus (HCV)	NULL	NULL
11.78	Active	5767688	87337483	624133	Shn3: Dual-Go Shn3RL cells Measured in Cell-Based System Using Plate Reader - 2134-02_Inhibitor_Dose_CherryPick_Activity	NULL	NULL
11.88	Active	5767688	87337483	624134	Shn3: Cytotox assay Measured in Cell-Based System Using Plate Reader - 2134-03_Inhibitor_Dose_CherryPick_Activity	NULL	NULL
18.3489	Active	5767688	17408270	540256	qHTS for Inhibitors of binding or entry into cells for Lassa Virus	NULL	NULL
34.254	Active	5767688	17408270	463136	Concentration-Response Confirmation Assays for HCS to Identify Inhibitors of Dynein Mediated Cargo Transport on Microtubules	NULL	NULL
	Active	5767688	17408270	818	High Throughput Screen to Identify Compounds that Suppress the Growth of Human Colon Tumor Cells Lacking Oncogenic Beta Catenin Expression	NULL	NULL
	Active	5767688	17408270	827	High Throughput Screen to Identify Compounds that Suppress the Growth of Cells with a Deletion of the PTEN Tumor Suppressor	NULL	NULL
	Active	5767688	17408270	1063	Leishmania major promastigote HTS	NULL	NULL
	Active	5767688	17408270	1381	HCS to Identify Inhibitors of Dynein Mediated Cargo Transport on Microtubules.	NULL	NULL
	Active	5767688	17408270	1814	MLPCN Alpha-Synuclein 5'UTR - 5'-UTR binding - activators	NULL	NULL
	Active	5767688	17408270	2717	Luminescence Cell-Based Primary HTS to Identify Inhibitors of Cancer Stem Cells	NULL	NULL
	Active	5767688	17408270	435005	Luminescence Cell-Based Primary HTS to Identify Inhibitors of Beta Cell Apoptosis.	NULL	NULL
	Active	5767688	17408270	449763	uHTS identification of small molecule activators of the apoptotic arm of the Unfolded Protein response via a luminescent-based reporter assay	NULL	NULL
	Active	5767688	17408270	463112	Single concentration confirmation of small molecule activators of the apoptotic arm of the Unfolded Protein response via a luminescent-based reporter assay	NULL	NULL
	Active	5767688	17408270	463116	HCS to Identify Inhibitors of Dynein Mediated Cargo Transport on Microtubules: Confirmation Assay	NULL	NULL
	Active	5767688	17408270	504408	Heat Shock Factor-1 (HSF-1) Measured in Cell-Based System Using Plate Reader - 2038-01_Activator_SinglePoint_HTS_Activity	NULL	NULL
	Active	5767688	17408270	504607	Single concentration confirmation of inhibitors of Mdm2/MdmX interaction using a Full-Length Luciferase Counterscreen assay	NULL	NULL
	Active	5767688	87337483	588335	Counterscreen for inhibitors of the fructose-bisphosphate aldolase (FBA) of M. tuberculosis: Absorbance-based biochemical high throughput Glycerophosphate Dehydrogenase-Triosephosphate Isomerase (GDH-TPI) full deck assay to identify assay artifacts	NULL	NULL
	Active	5767688	87337483	588674	Schnurri-3 Inhibitors: specific inducers of adult bone formation Measured in Cell-Based System Using Plate Reader - 2134-01_Inhibitor_SinglePoint_HTS_Activity_Set2	NULL	NULL
	Active	5767688	87337483	588794	Counterscreen for inhibitors of the Steroid Receptor Coactivator 3 (SRC3; NCOA3): Luminescence-based cell-based high throughput assay to identify inhibitors of the Herpes Virus Virion Protein 16 (VP16)	NULL	NULL
	Active	5767688	87337483	588824	Counterscreen for inhibitors of the Steroid Receptor Coactivator 1 (SRC1; NCOA1): Luminescence-based cell-based high throughput assay to identify inhibitors of the Herpes Virus Virion Protein 16 (VP16).	NULL	NULL
	Active	5767688	87337483	602141	uHTS determination of small molecule cytotoxicity in a fluorescence assay to identify cystic fibrosis induced NFkb Inhibitors	NULL	NULL
	Active	5767688	87337483	651611	Counterscreen for inverse agonists of the liver receptor homolog-1 (LRH-1; NR5A2): Luminescence-based cell-based high throughput assay to identify nonselective inhibitors of the Steroidogenic acute regulatory protein (StAR) promoter or luminescence assay	NULL	NULL
	Active	5767688	87337483	651615	Counterscreen for inverse agonists of the liver receptor homolog-1 (LRH-1; NR5A2): Luminescence-based cell-based high throughput assay to identify inhibitors of the Herpes Virus Virion Protein 16 (VP16)	NULL	NULL
	Active	5767688	87337483	651661	Luminescence Cell-Based Primary HTS to identify inhibitors of the oncoprotein EWS/Fli transcriptional activity Measured in Cell-Based System Using Plate Reader - 7014-01_Inhibitor_SinglePoint_HTS_Activity	NULL	NULL
	Active	5767688	87337483	651702	Flow Cytometric HTS Screening for Inhibitors of Lytic Granule Exocytosis with MLPCN Compound Library	NULL	NULL
	Active	5767688	87337483	651723	MLPCN PGC1a Modulators Measured in Cell-Based System Using Plate Reader - 2139-01_Activator_SinglePoint_HTS_Activity	NULL	NULL
	Active	5767688	87337483	652007	Counterscreen for inhibitors of the Steroid Receptor Coactivator 2 (SRC2; NCOA2): Luminescence-based cell-based high throughput assay to identify inhibitors of the Herpes Virus Virion Protein 16 (VP16)	NULL	NULL
	Active	5767688	87337483	687007	Counterscreen for antagonists of COUP-TFII (NR2F2): Luminescence-based cell-based high throughput assay to identify inhibitors of the Herpes Virus Virion Protein 16 (VP16)	NULL	NULL
	Active	5767688	87337483	720647	Bursicon-induced LGR2 mediated cAMP production in LGR-2/CRE6x-Luciferase co-transfected HEK293 cells Inhibition	NULL	NULL
	Active	5767688	87337483	1159606	uHTS identification of small molecule inhibitors of TWEAK-Fn14 interactions, using a cell-based reporter assay	NULL	NULL

## Sheet: O13
acvalue	activity	cid	sid	aid	aidname	targetname	targeturl
	Active	762594	47202064	488918	Single concentration confirmation of inhibitors of Sentrin-specific proteases (SENPs) using a Caspase-3 Selectivity assay	CASP3	https://pubchem.ncbi.nlm.nih.gov/target/gene/CASP3
	Active	762594	47202064	624463	Beta-Arrestin HTS for Positive Allosteric Modulators of the Human D2 Dopamine Receptor: Antagonists	DRD2	https://pubchem.ncbi.nlm.nih.gov/target/gene/DRD2
9.2	Active	762594	47202064	624296	A quantitative high throughput screen for small molecules that induce DNA re-replication in MCF 10a normal breast cells.	GMNN	https://pubchem.ncbi.nlm.nih.gov/target/gene/GMNN
20.5962	Active	762594	47202064	624297	A quantitative high throughput screen for small molecules that induce DNA re-replication in SW480 colon adenocarcinoma cells.	GMNN	https://pubchem.ncbi.nlm.nih.gov/target/gene/GMNN
	Active	762594	47202064	485270	FRET-based cell-based primary high throughput screening assay to identify antagonists of the orexin 1 receptor (OX1R; HCRTR1)	HCRTR1	https://pubchem.ncbi.nlm.nih.gov/target/gene/HCRTR1
	Active	762594	47202064	435030	Absorbance-based primary bacterial cell-based high throughput screening assay to identify inhibitors of AddAB recombination protein complex	HP1089	https://pubchem.ncbi.nlm.nih.gov/target/gene/HP1089
	Active	762594	47202064	488942	Absorbance-based bacterial cell-based high throughput confirmation assay for inhibitors of AddAB recombination protein complex	HP1089	https://pubchem.ncbi.nlm.nih.gov/target/gene/HP1089
	Active	762594	47202064	651984	Counterscreen for RECBCD inhibitors: absorbance-based high throughput cell-based assay to identify inhibitors of AddAB recombination protein complex	HP1089	https://pubchem.ncbi.nlm.nih.gov/target/gene/HP1089
	Active	762594	47202064	435030	Absorbance-based primary bacterial cell-based high throughput screening assay to identify inhibitors of AddAB recombination protein complex	HP1553	https://pubchem.ncbi.nlm.nih.gov/target/gene/HP1553
	Active	762594	47202064	488942	Absorbance-based bacterial cell-based high throughput confirmation assay for inhibitors of AddAB recombination protein complex	HP1553	https://pubchem.ncbi.nlm.nih.gov/target/gene/HP1553
	Active	762594	47202064	651984	Counterscreen for RECBCD inhibitors: absorbance-based high throughput cell-based assay to identify inhibitors of AddAB recombination protein complex	HP1553	https://pubchem.ncbi.nlm.nih.gov/target/gene/HP1553
	Active	762594	47202064	602163	Absorbance-based biochemical primary high throughput screening assay to identify activators of Methionine sulfoxide reductase A (MsrA)	MSRA	https://pubchem.ncbi.nlm.nih.gov/target/gene/281312
	Active	762594	47202064	651614	Counterscreen for inverse agonists of the liver receptor homolog-1 (LRH-1; NR5A2): Luminescence-based cell-based high throughput assay to identify inverse agonists of the Steroidogenic Factor 1 Nuclear Receptor (SF1; NR5A1)	NR5A1	https://pubchem.ncbi.nlm.nih.gov/target/gene/NR5A1
	Active	762594	47202064	651613	Luminescence-based cell-based high throughput confirmation assay for inverse agonists of the liver receptor homolog-1 (LRH-1; NR5A2)	NR5A2	https://pubchem.ncbi.nlm.nih.gov/target/gene/NR5A2
	Active	762594	47202064	488955	Counterscreen for AddAB inhibitors: absorbance-based high throughput cell-based assay to identify inhibitors of RecBCD	recB	https://pubchem.ncbi.nlm.nih.gov/target/gene/recB
	Active	762594	47202064	651602	Absorbance-based primary bacterial cell-based high throughput screening assay to identify inhibitors of RecBCD (with phage)	recB	https://pubchem.ncbi.nlm.nih.gov/target/gene/recB
	Active	762594	47202064	488955	Counterscreen for AddAB inhibitors: absorbance-based high throughput cell-based assay to identify inhibitors of RecBCD	recC	https://pubchem.ncbi.nlm.nih.gov/target/gene/recC
	Active	762594	47202064	651602	Absorbance-based primary bacterial cell-based high throughput screening assay to identify inhibitors of RecBCD (with phage)	recC	https://pubchem.ncbi.nlm.nih.gov/target/gene/recC
	Active	762594	47202064	488955	Counterscreen for AddAB inhibitors: absorbance-based high throughput cell-based assay to identify inhibitors of RecBCD	recD	https://pubchem.ncbi.nlm.nih.gov/target/gene/recD
	Active	762594	47202064	651602	Absorbance-based primary bacterial cell-based high throughput screening assay to identify inhibitors of RecBCD (with phage)	recD	https://pubchem.ncbi.nlm.nih.gov/target/gene/recD
	Active	762594	47202064	2599	uHTS Luminescent assay for identification of inhibitors of Sentrin-specific protease 6 (SENP6)	SENP6	https://pubchem.ncbi.nlm.nih.gov/target/gene/SENP6
	Active	762594	47202064	488915	Single concentration confirmation of uHTS for inhibitors of Sentrin-specific protease 6 (SENP6) using a Luminescent assay	SENP6	https://pubchem.ncbi.nlm.nih.gov/target/gene/SENP6
	Active	762594	47202064	602440	uHTS Fluorescent Assay Using Nedd8 Protein Substrate for Identification of Inhibitors of Sentrin-Specific Protease 8 (SENP8)	SENP8	https://pubchem.ncbi.nlm.nih.gov/target/gene/SENP8
10.3225	Active	762594	47202064	686979	qHTS for Inhibitors of human tyrosyl-DNA phosphodiesterase 1 (TDP1): qHTS in cells in presence of CPT	TDP1	https://pubchem.ncbi.nlm.nih.gov/target/gene/TDP1
11.5821	Active	762594	47202064	686978	qHTS for Inhibitors of human tyrosyl-DNA phosphodiesterase 1 (TDP1): qHTS in cells in absence of CPT	TDP1	https://pubchem.ncbi.nlm.nih.gov/target/gene/TDP1
	Active	762594	47202064	463190	uHTS identification of small molecule inhibitors of tim10-1 yeast via a luminescent assay	TIM10	https://pubchem.ncbi.nlm.nih.gov/target/gene/TIM10
	Active	762594	47202064	463195	uHTS identification of small molecule inhibitors of tim10 yeast via a luminescent assay	TIM10	https://pubchem.ncbi.nlm.nih.gov/target/gene/TIM10
	Active	762594	47202064	463213	Single concentration confirmation of small molecule inhibitors of tim10-1 yeast via a luminescent assay	TIM10	https://pubchem.ncbi.nlm.nih.gov/target/gene/TIM10
	Active	762594	47202064	463215	Single concentration confirmation of small molecule inhibitors of tim10 yeast via a luminescent assay	TIM10	https://pubchem.ncbi.nlm.nih.gov/target/gene/TIM10
	Active	762594	47202064	463212	uHTS identification of small molecule inhibitors of tim23-1 yeast via a luminescent assay	TIM23	https://pubchem.ncbi.nlm.nih.gov/target/gene/855751
	Active	762594	47202064	463218	Single concentration confirmation of small molecule inhibitors of tim23-1 yeast via a luminescent assay	TIM23	https://pubchem.ncbi.nlm.nih.gov/target/gene/855751
1.2964	Active	762594	47202064	588397	qHTS of small molecules that selectively kill Giardia lamblia: Hit Validation.	NULL	NULL
25	Active	762594	47202064	588719	Vero 76 Cytoxicity Assay for VEEV Compounds	NULL	NULL
	Active	762594	47202064	1814	MLPCN Alpha-Synuclein 5'UTR - 5'-UTR binding - activators	NULL	NULL
	Active	762594	47202064	1825	Luminescence-based counterscreen assay for KLF5 inhibitors: cell-based high throughput screening assay to identify cytotoxic compounds using the IEC-6 intestinal epithelial cell line.	NULL	NULL
	Active	762594	47202064	2314	Cycloheximide Counterscreen for Small Molecule Inhibitors of Shiga Toxin	NULL	NULL
	Active	762594	47202064	2314	Cycloheximide Counterscreen for Small Molecule Inhibitors of Shiga Toxin	NULL	NULL
	Active	762594	47202064	2315	A qHTS for Small Molecule Inhibitors of Shiga Toxin	NULL	NULL
	Active	762594	47202064	2315	A qHTS for Small Molecule Inhibitors of Shiga Toxin	NULL	NULL
	Active	762594	47202064	449728	Counterscreen for inhibitors of AddAB: absorbance-based bacterial cell-based high throughput screening assay to identify inhibitors of bacterial viability	NULL	NULL
	Active	762594	47202064	488956	Counterscreen for AddAB inhibitors: absorbance-based bacterial cell-based high throughput confirmation assay for inhibitors of bacterial viability	NULL	NULL
	Active	762594	47202064	540267	Small Molecules that selectively kill Giardia lamblia: qHTS	NULL	NULL
	Active	762594	125159468	1053175	A screen for compounds that inhibit growth of Escherichia coli	NULL	NULL

## Sheet: O18
acvalue	activity	cid	sid	aid	aidname	targetname	targeturl
0.71	Active	5720181	85267436	2165	Late stage results from the probe development effort to identify inhibitors of the Janus kinase 2 mutant JAK2V617F.	JAK2	https://pubchem.ncbi.nlm.nih.gov/target/gene/JAK2
1.17	Active	5720181	85267436	2165	Late stage results from the probe development effort to identify inhibitors of the Janus kinase 2 mutant JAK2V617F.	JAK2	https://pubchem.ncbi.nlm.nih.gov/target/gene/JAK2
23.96	Active	5720181	85267436	2165	Late stage results from the probe development effort to identify inhibitors of the Janus kinase 2 mutant JAK2V617F.	JAK2	https://pubchem.ncbi.nlm.nih.gov/target/gene/JAK2
	Active	5720181	85267436	2165	Late stage results from the probe development effort to identify inhibitors of the Janus kinase 2 mutant JAK2V617F.	JAK2	https://pubchem.ncbi.nlm.nih.gov/target/gene/JAK2
0.69	Active	5720181	85267436	2165	Late stage results from the probe development effort to identify inhibitors of the Janus kinase 2 mutant JAK2V617F.	NULL	NULL

## Sheet: O6 (PAIN, non-toxic)
acvalue	activity	cid	sid	aid	aidname	targetname	targeturl
	Active	15999028	49670535	743256	Counterscreen for exosite inhibitors of ADAM17: Fluorescence resonance energy transfer (FRET)-based biochemical high throughput screening assay to identify inhibitors of ADAM10	ADAM10	https://pubchem.ncbi.nlm.nih.gov/target/gene/ADAM10
	Active	15999028	49670535	720648	QFRET-based biochemical primary high throughput screening assay to identify exosite inhibitors of ADAM17.	ADAM17	https://pubchem.ncbi.nlm.nih.gov/target/gene/ADAM17
	Active	15999028	49670535	743257	QFRET-based biochemical high throughput confirmation assay to identify exosite inhibitors of ADAM17	ADAM17	https://pubchem.ncbi.nlm.nih.gov/target/gene/ADAM17
39.8107	Active	15999028	49670535	651635	qHTS for Inhibitors of ATXN expression	ATXN2	https://pubchem.ncbi.nlm.nih.gov/target/gene/ATXN2
4.769	Active	15999028	49670535	449749	Fluorescence Cell-Free Homogeneous Secondary Screen to Identify Inhibitors of DnaB-Intein Splicing Activity	dnaB	https://pubchem.ncbi.nlm.nih.gov/target/gene/dnaB
5.183	Active	15999028	49670535	449750	Fluorescence Cell-Free Homogeneous Secondary Screen to Identify Non-Covalent Inhibitors of RecA-Intein Splicing Activity	dnaB	https://pubchem.ncbi.nlm.nih.gov/target/gene/dnaB
	Active	15999028	49670535	493131	Activator for delta FosB/delta FosB homodimer Measured in Biochemical System Using Plate Reader - 2072-01_Activator_SinglePoint_HTS_Activity	Fosb	https://pubchem.ncbi.nlm.nih.gov/target/gene/14282
5.6234	Active	15999028	49670535	624417	qHTS of GLP-1 Receptor Inverse Agonists (Inhibition Mode)	GLP1R	https://pubchem.ncbi.nlm.nih.gov/target/gene/GLP1R
16.3601	Active	15999028	49670535	686970	qHTS for induction of synthetic lethality in tumor cells producing 2HG: qHTS for the HT-1080-NT fibrosarcoma cell line	IDH1	https://pubchem.ncbi.nlm.nih.gov/target/gene/IDH1
	Active	15999028	49670535	743279	qHTS for Inhibitors of Inflammasome Signaling: IL-1-beta AlphaLISA Primary Screen	IL1B	https://pubchem.ncbi.nlm.nih.gov/target/gene/IL1B
	Active	15999028	49670535	652147	Specificity screen against KCNQ1/KCNE1 for identification of compounds that inhibit KCNQ1 potassium channels	KCNE1	https://pubchem.ncbi.nlm.nih.gov/target/gene/KCNE1
	Active	15999028	49670535	2642	Primary cell-based high-throughput screening assay for identification of compounds that inhibit KCNQ1 potassium channels	KCNQ1	https://pubchem.ncbi.nlm.nih.gov/target/gene/KCNQ1
	Active	15999028	49670535	588353	Validation (re-confirmation) assay for identification of compounds that inhibit KCNQ1 potassium channels	KCNQ1	https://pubchem.ncbi.nlm.nih.gov/target/gene/KCNQ1
	Active	15999028	49670535	652147	Specificity screen against KCNQ1/KCNE1 for identification of compounds that inhibit KCNQ1 potassium channels	KCNQ1	https://pubchem.ncbi.nlm.nih.gov/target/gene/KCNQ1
	Active	15999028	49670535	651746	Specificity screen against KCNQ2 for identification of compounds that inhibit KCNQ1 potassium channels	Kcnq2	https://pubchem.ncbi.nlm.nih.gov/target/gene/170848
	Active	15999028	49670535	493036	Image-Based HTS for Selective Agonists for NTR1	NTSR1	https://pubchem.ncbi.nlm.nih.gov/target/gene/NTSR1
8.24	Active	15999028	49670535	435010	Fluorescence Cell-Free Homogeneous Dose Retest to Identify Inhibitors of RecA-Intein Splicing Activity	recA	https://pubchem.ncbi.nlm.nih.gov/target/gene/recA
92.08	Active	15999028	49670535	434968	Fluorescence Cell-Free Homogeneous Counter Screen to Identify Inhibitors of GFP Chromophore Formation	recA	https://pubchem.ncbi.nlm.nih.gov/target/gene/recA
	Active	15999028	49670535	2221	Fluorescence Cell-Free Homogenous Primary HTS to Identify Inhibitors of RecA Intein Splicing Activity	recA	https://pubchem.ncbi.nlm.nih.gov/target/gene/recA
	Active	15999028	49670535	488896	HTS using DiI-HDL to assay lipid transfer in ldlA[SR-BI] cells Measured in Cell-Based System Using Plate Reader - 2085-01_Inhibitor_SinglePoint_HTS_Activity	Scarb1	https://pubchem.ncbi.nlm.nih.gov/target/gene/20778
2.316	Active	15999028	49670535	1902	Luminescence Microorganism-Based Dose Confirmation HTS to Identify Inhibitors of Streptokinase Promotor Activity	ska	https://pubchem.ncbi.nlm.nih.gov/target/gene/ska
	Active	15999028	49670535	1662	MLPCN Streptokinase Expression Inhibition	ska	https://pubchem.ncbi.nlm.nih.gov/target/gene/ska
1.401	Active	15999028	49670535	1900	Luminescence Microorganism-Based Dose Confirmation HTS to Identify Compounds Cytotoxic to SK(-)GAS Group A Streptococcus	NULL	NULL
11.541	Active	15999028	49670535	1915	Luminescence Microorganism-Based Dose Response HTS to Identify Compounds Cytotoxic to Streptococcus	NULL	NULL
23.1093	Active	15999028	49670535	686971	qHTS for induction of synthetic lethality in tumor cells producing 2HG: qHTS for the HT-1080-IDH1KD cell line	NULL	NULL
	Active	15999028	49670535	1259313	uHTS identification of small molecule modulators of NR3A	NULL	NULL

[truncated: 2 more sheets: Curcumin (PAIN), Resveratrol (PAIN)]
